# Supplementary material for: A novel signature incorporating genes related to lipid metabolism and immune for prognostic and functional prediction of breast cancer
Source: Aging (Albany NY). 2024 May 20;16(10):8611–29. doi: 10.18632/aging.205828 (PMC11164511; doi:10.18632/aging.205828)
Supplement: Supplementary Table 1 [file aging-16-205828-s001.xlsx]

## Sheet: Supplementary Table 1
Supplementary Table 1. Deseq2-DEGs-adjust-0.05-FC-1.
	Symbol	baseMean	logFC	lfcSE	stat	pval	adj.P.Val
A2M	A2M	46972.9	-1.10715	0.104297	-10.6154	2.53e-26	1.59e-25
A2M-AS1	A2M-AS1	81.2414	-1.41352	0.0806599	-17.5244	9.33e-69	2.7e-67
A2ML1	A2ML1	590.596	3.25395	0.281997	11.539	8.39e-31	6.47e-30
A2MP1	A2MP1	16.5488	-1.15806	0.143093	-8.09311	5.82e-16	2.21e-15
A4GNT	A4GNT	3.52946	-1.49546	0.165609	-9.03001	1.72e-19	7.81e-19
AACSP1	AACSP1	8.65165	2.4773	0.3209	7.71984	1.16e-14	4.11e-14
AADAC	AADAC	44.497	-4.45893	0.304373	-14.6495	1.36e-48	2.05e-47
AADACL2-AS1	AADACL2-AS1	7.52982	-1.34435	0.190855	-7.04381	1.87e-12	5.8e-12
AADACP1	AADACP1	5.69494	-2.65533	0.192326	-13.8064	2.33e-43	2.95e-42
AARD	AARD	3538.12	2.2071	0.206505	10.6879	1.16e-26	7.43e-26
AASS	AASS	389.822	-1.88388	0.103888	-18.1338	1.73e-73	5.75e-72
ABAT	ABAT	3966.72	1.2643	0.154327	8.19238	2.56e-16	9.88e-16
ABCA1	ABCA1	2901.01	-1.39804	0.0920038	-15.1954	3.79e-52	6.43e-51
ABCA10	ABCA10	210.214	-3.41846	0.152139	-22.4692	8.3e-112	7.83e-110
ABCA12	ABCA12	1542.62	1.16102	0.229633	5.05597	4.28e-07	9.28e-07
ABCA17P	ABCA17P	72.3561	1.13747	0.124884	9.10819	8.38e-20	3.87e-19
ABCA5	ABCA5	1253.41	-1.54202	0.0956455	-16.1223	1.78e-58	3.65e-57
ABCA6	ABCA6	532.022	-2.80825	0.129431	-21.6968	2.2e-104	1.71e-102
ABCA8	ABCA8	1016.49	-3.98143	0.18064	-22.0407	1.17e-107	9.95e-106
ABCA9	ABCA9	577.008	-3.71776	0.151897	-24.4755	2.7e-132	4.1e-130
ABCA9-AS1	ABCA9-AS1	2.04983	-2.47197	0.208321	-11.8662	1.77e-32	1.47e-31
ABCB1	ABCB1	347.244	-2.03601	0.128752	-15.8134	2.52e-56	4.85e-55
ABCB11	ABCB11	11.812	-2.24973	0.237747	-9.46271	3e-21	1.49e-20
ABCB5	ABCB5	51.9566	-3.49821	0.210812	-16.594	7.7e-62	1.77e-60
ABCC12	ABCC12	130.192	1.85786	0.309908	5.99487	2.04e-09	5.22e-09
ABCC13	ABCC13	216.759	5.57745	0.346606	16.0916	2.92e-58	5.97e-57
ABCC5	ABCC5	4661.89	1.10994	0.103977	10.6749	1.33e-26	8.53e-26
ABCC6	ABCC6	354.27	-1.55966	0.151833	-10.2722	9.4e-25	5.51e-24
ABCC6P1	ABCC6P1	18.5947	-1.30676	0.217824	-5.99918	1.98e-09	5.09e-09
ABCC9	ABCC9	941.899	-2.44773	0.116699	-20.9746	1.12e-97	7.43e-96
ABCD2	ABCD2	214.298	-4.21595	0.162429	-25.9556	1.57e-148	3.72e-146
ABCG2	ABCG2	296.269	-1.43751	0.12498	-11.5019	1.29e-30	9.84e-30
ABCG8	ABCG8	5.04677	-1.95674	0.231851	-8.43963	3.18e-17	1.29e-16
ABHD11	ABHD11	3407.61	1.36302	0.0898415	15.1714	5.47e-52	9.23e-51
ABHD12	ABHD12	5244.9	1.10665	0.0725871	15.2458	1.76e-52	3.02e-51
ABHD17AP4	ABHD17AP4	2.66673	1.03309	0.237167	4.35596	1.32e-05	2.54e-05
ABHD17C	ABHD17C	1942.44	1.40301	0.0944261	14.8583	6.15e-50	9.72e-49
ABHD2	ABHD2	14934.7	1.00692	0.124853	8.06487	7.33e-16	2.76e-15
ABHD6	ABHD6	465.331	-1.22206	0.0860697	-14.1985	9.37e-46	1.29e-44
ABI3BP	ABI3BP	1954.86	-2.20883	0.152082	-14.524	8.54e-48	1.25e-46
ABLIM1	ABLIM1	8282.43	-1.46229	0.0846421	-17.2761	7.12e-67	1.94e-65
ABLIM3	ABLIM3	2560.63	-1.54249	0.140234	-10.9994	3.85e-28	2.63e-27
ABRA	ABRA	2.08117	-2.33959	0.194635	-12.0204	2.78e-33	2.38e-32
ABRACL	ABRACL	2472.76	1.44187	0.0985581	14.6296	1.82e-48	2.74e-47
ABTB3	ABTB3	345.13	-1.05661	0.139097	-7.59618	3.05e-14	1.05e-13
ACAA2	ACAA2	3186.85	-1.24717	0.0748594	-16.6602	2.55e-62	5.97e-61
ACACB	ACACB	3726.52	-3.77326	0.128335	-29.4017	5.23e-190	4e-187
ACAD11	ACAD11	37.925	-1.35498	0.0787518	-17.2057	2.41e-66	6.4e-65
ACADL	ACADL	126.94	-3.44772	0.248599	-13.8686	9.82e-44	1.26e-42
ACADS	ACADS	1272.58	-1.43781	0.109672	-13.11	2.89e-39	3.09e-38
ACAN	ACAN	392.878	3.20261	0.182886	17.5115	1.17e-68	3.38e-67
ACKR1	ACKR1	1897.77	-2.28721	0.204912	-11.1619	6.27e-29	4.43e-28
ACKR3	ACKR3	2195.48	-1.78058	0.119991	-14.8393	8.17e-50	1.28e-48
ACKR4	ACKR4	108.135	-1.66262	0.133731	-12.4326	1.74e-35	1.62e-34
ACMSD	ACMSD	67.1433	1.66823	0.234037	7.12808	1.02e-12	3.22e-12
ACO1	ACO1	3657.76	-2.1314	0.0749407	-28.4411	6.27e-178	3.25e-175
ACOD1	ACOD1	3.55361	3.27898	0.346798	9.455	3.23e-21	1.6e-20
ACOT7	ACOT7	1840.28	1.38019	0.0891821	15.4761	5.03e-54	9.07e-53
ACOXL	ACOXL	39.4128	1.35244	0.159571	8.47548	2.34e-17	9.56e-17
ACP7	ACP7	20.8669	2.53153	0.282322	8.96682	3.05e-19	1.37e-18
ACRP1	ACRP1	1.84884	1.0564	0.271319	3.89355	9.88e-05	0.000174993
ACRV1	ACRV1	14.9452	1.57561	0.145933	10.7968	3.56e-27	2.33e-26
ACSL1	ACSL1	10353.6	-2.90422	0.122035	-23.7983	3.47e-125	4.62e-123
ACSL4	ACSL4	2487.94	-1.23419	0.0975182	-12.656	1.04e-36	1.01e-35
ACSL6	ACSL6	162.182	1.13589	0.181177	6.26953	3.62e-10	9.78e-10
ACSM1	ACSM1	280.679	-1.47456	0.192326	-7.66699	1.76e-14	6.15e-14
ACSM2A	ACSM2A	3.09735	-2.82303	0.266243	-10.6032	2.88e-26	1.81e-25
ACSM2B	ACSM2B	2.85659	-2.94452	0.221175	-13.3131	1.94e-40	2.18e-39
ACSM3	ACSM3	296.079	-1.73188	0.133623	-12.9609	2.04e-38	2.11e-37
ACSM5	ACSM5	213.925	-3.83936	0.134302	-28.5875	9.61e-180	5.44e-177
ACSM5P1	ACSM5P1	3.06626	-1.49481	0.27602	-5.41561	6.11e-08	1.41e-07
ACSS2	ACSS2	3163.76	-1.78333	0.070638	-25.246	1.25e-140	2.34e-138
ACSS3	ACSS3	1591.91	-1.29618	0.138965	-9.32736	1.09e-20	5.24e-20
ACTA1	ACTA1	226.975	1.51487	0.225277	6.72446	1.76e-11	5.17e-11
ACTA2	ACTA2	20810.2	-1.56441	0.109327	-14.3095	1.91e-46	2.68e-45
ACTA2-AS1	ACTA2-AS1	230.62	-2.58133	0.144762	-17.8316	4.02e-71	1.25e-69
ACTBP12	ACTBP12	40.4665	4.77916	0.364968	13.0947	3.53e-39	3.77e-38
ACTE1P	ACTE1P	1.93297	1.21644	0.276434	4.40045	1.08e-05	2.09e-05
ACTG1P11	ACTG1P11	1.49193	1.22792	0.265631	4.62266	3.79e-06	7.6e-06
ACTG1P22	ACTG1P22	26.9477	1.59006	0.363537	4.37385	1.22e-05	2.35e-05
ACTG1P25	ACTG1P25	26.5713	2.19127	0.134218	16.3262	6.42e-60	1.37e-58
ACTG2	ACTG2	4720.18	-1.8594	0.229902	-8.08777	6.08e-16	2.3e-15
ACTL11P	ACTL11P	3.36151	1.50106	0.240673	6.23691	4.46e-10	1.2e-09
ACTL6B	ACTL6B	5.54264	2.45979	0.367337	6.69627	2.14e-11	6.24e-11
ACTL8	ACTL8	161.129	7.14598	0.363683	19.6489	5.91e-86	2.83e-84
ACTN2	ACTN2	110.147	2.52969	0.24733	10.228	1.49e-24	8.64e-24
ACTN3	ACTN3	6.76623	-1.11821	0.140348	-7.96745	1.62e-15	5.98e-15
ACVR1C	ACVR1C	558.437	-5.29954	0.177499	-29.8568	7.17e-196	6.85e-193
ACVRL1	ACVRL1	1544.58	-1.1386	0.0774997	-14.6917	7.29e-49	1.11e-47
ADAD2	ADAD2	10.5327	-1.40323	0.160912	-8.72053	2.77e-18	1.19e-17
ADAM12	ADAM12	6196.02	1.2147	0.129084	9.41011	4.96e-21	2.43e-20
ADAM19	ADAM19	1407.74	1.64792	0.106221	15.5141	2.79e-54	5.06e-53
ADAM33	ADAM33	422.105	-2.72503	0.157487	-17.3032	4.45e-67	1.22e-65
ADAM7-AS1	ADAM7-AS1	2.63349	1.27814	0.268802	4.75495	1.98e-06	4.08e-06
ADAM8	ADAM8	1354.01	2.25759	0.115562	19.5358	5.45e-85	2.54e-83
ADAMDEC1	ADAMDEC1	546.887	3.11124	0.196034	15.8709	1.01e-56	1.98e-55
ADAMTS1	ADAMTS1	4156.37	-2.26117	0.132876	-17.0172	6.13e-65	1.56e-63
ADAMTS14	ADAMTS14	397.2	3.13317	0.130544	24.001	2.72e-127	3.72e-125
ADAMTS18	ADAMTS18	188.889	-1.73775	0.198919	-8.73599	2.42e-18	1.04e-17
ADAMTS19	ADAMTS19	123.645	2.12712	0.247427	8.59696	8.19e-18	3.42e-17
ADAMTS19-AS1	ADAMTS19-AS1	11.5912	2.27059	0.262673	8.64419	5.42e-18	2.29e-17
ADAMTS20	ADAMTS20	12.1282	4.26388	0.346272	12.3137	7.65e-35	6.95e-34
ADAMTS3	ADAMTS3	170.309	-1.34711	0.136998	-9.83313	8.11e-23	4.35e-22
ADAMTS5	ADAMTS5	1354.14	-3.09596	0.121282	-25.527	9.88e-144	2.07e-141
ADAMTS6	ADAMTS6	210.963	1.12982	0.107568	10.5033	8.35e-26	5.13e-25
ADAMTS8	ADAMTS8	143.898	-1.24614	0.190682	-6.53516	6.35e-11	1.8e-10
ADAMTS9	ADAMTS9	1176.91	-1.29849	0.112952	-11.496	1.38e-30	1.05e-29
ADAMTS9-AS1	ADAMTS9-AS1	62.1375	-3.01962	0.167476	-18.0301	1.13e-72	3.68e-71
ADAMTS9-AS2	ADAMTS9-AS2	53.9766	-3.33149	0.145143	-22.9531	1.37e-116	1.5e-114
ADAMTSL1	ADAMTSL1	469.588	-1.06316	0.110367	-9.63294	5.8e-22	2.99e-21
ADAMTSL2	ADAMTSL2	575.587	1.58262	0.107031	14.7866	1.79e-49	2.78e-48
ADAMTSL3	ADAMTSL3	536.786	-1.02899	0.131578	-7.82041	5.27e-15	1.89e-14
ADAMTSL4	ADAMTSL4	764.864	-1.89473	0.124844	-15.1768	5.04e-52	8.51e-51
ADAMTSL4-AS2	ADAMTSL4-AS2	27.0894	-1.1472	0.137554	-8.34	7.43e-17	2.95e-16
ADAP1	ADAP1	312.422	1.31992	0.125538	10.5142	7.43e-26	4.59e-25
ADAT3	ADAT3	118.465	1.16361	0.119281	9.75518	1.75e-22	9.24e-22
ADCK5	ADCK5	681.804	1.31233	0.0988107	13.2812	2.98e-40	3.33e-39
ADCY4	ADCY4	738.816	-1.77161	0.102855	-17.2243	1.75e-66	4.65e-65
ADCY5	ADCY5	1297.29	-1.30096	0.187558	-6.93632	4.02e-12	1.22e-11
ADCY6-DT	ADCY6-DT	16.5981	1.67816	0.139582	12.0228	2.7e-33	2.31e-32
ADCYAP1R1	ADCYAP1R1	205.53	-2.72927	0.154391	-17.6777	6.23e-70	1.88e-68
ADD3	ADD3	4243.75	-1.39961	0.101221	-13.8272	1.75e-43	2.22e-42
ADD3-AS1	ADD3-AS1	12.0825	-2.33462	0.119414	-19.5507	4.07e-85	1.91e-83
ADGB	ADGB	8.54806	1.74515	0.259399	6.72764	1.72e-11	5.07e-11
ADGRA2	ADGRA2	2453.69	-1.50376	0.0964946	-15.5839	9.37e-55	1.72e-53
ADGRB2	ADGRB2	2036.93	1.95326	0.153393	12.7337	3.84e-37	3.77e-36
ADGRB3	ADGRB3	27.1248	-1.83958	0.178915	-10.2819	8.51e-25	4.99e-24
ADGRB3-DT	ADGRB3-DT	5.31738	-2.17279	0.210312	-10.3313	5.09e-25	3.02e-24
ADGRD1	ADGRD1	287.479	-2.60847	0.148051	-17.6187	1.77e-69	5.25e-68
ADGRD2	ADGRD2	69.0402	-3.56751	0.333861	-10.6856	1.19e-26	7.61e-26
ADGRF2	ADGRF2	5.19553	1.77848	0.26192	6.79018	1.12e-11	3.32e-11
ADGRF4	ADGRF4	50.2865	3.31881	0.256847	12.9214	3.41e-38	3.49e-37
ADGRF5	ADGRF5	2619.6	-1.98259	0.0892747	-22.2078	2.89e-109	2.57e-107
ADGRF5P2	ADGRF5P2	2.79006	-2.12168	0.12842	-16.5214	2.58e-61	5.79e-60
ADGRG2	ADGRG2	231.353	-1.02869	0.194001	-5.30249	1.14e-07	2.59e-07
ADGRG3	ADGRG3	42.2521	-1.73234	0.164875	-10.507	8.02e-26	4.94e-25
ADGRG4	ADGRG4	3.301	-3.34982	0.269974	-12.4079	2.37e-35	2.2e-34
ADGRL2	ADGRL2	2416.58	-1.16052	0.119175	-9.73793	2.08e-22	1.09e-21
ADGRL3	ADGRL3	227.981	-2.07121	0.185549	-11.1626	6.21e-29	4.39e-28
ADGRL4	ADGRL4	2053.88	-1.63863	0.0907414	-18.0582	6.8e-73	2.24e-71
ADH1A	ADH1A	17.6915	-5.05898	0.221737	-22.8152	3.24e-115	3.41e-113
ADH1B	ADH1B	9420.01	-5.18402	0.269564	-19.2311	2.03e-82	8.81e-81
ADH1C	ADH1C	180.223	-3.45903	0.228746	-15.1217	1.16e-51	1.94e-50
ADH4	ADH4	14.0509	-3.90854	0.238661	-16.3769	2.8e-60	6.06e-59
ADH6	ADH6	14.283	-1.36758	0.133711	-10.2279	1.49e-24	8.64e-24
ADHFE1	ADHFE1	351.775	-2.06161	0.115376	-17.8686	2.07e-71	6.5e-70
ADIPOQ	ADIPOQ	7147.21	-5.28752	0.283098	-18.6773	7.57e-78	2.94e-76
ADIRF-AS1	ADIRF-AS1	387.62	-1.2477	0.105403	-11.8374	2.5e-32	2.05e-31
ADM	ADM	932.038	-1.45936	0.162921	-8.95751	3.32e-19	1.49e-18
ADM2	ADM2	907.859	2.15421	0.119329	18.0527	7.51e-73	2.46e-71
ADORA2A	ADORA2A	29.3231	1.54232	0.159185	9.68887	3.36e-22	1.75e-21
ADORA2BP1	ADORA2BP1	2.1704	-2.32417	0.200221	-11.608	3.75e-31	2.94e-30
ADRA1A	ADRA1A	47.067	-4.71138	0.19894	-23.6825	5.47e-124	7.05e-122
ADRA2A	ADRA2A	1557.66	-1.46382	0.142555	-10.2684	9.78e-25	5.72e-24
ADRA2B	ADRA2B	76.1816	-1.04308	0.141779	-7.35707	1.88e-13	6.21e-13
ADRB1	ADRB1	111.886	-1.44402	0.243951	-5.9193	3.23e-09	8.18e-09
ADRB2	ADRB2	240.462	-2.85614	0.129678	-22.0249	1.66e-107	1.4e-105
ADRB3	ADRB3	6.86873	-3.0783	0.236249	-13.0299	8.27e-39	8.72e-38
AEBP1	AEBP1	43471.2	1.11969	0.116939	9.57498	1.02e-21	5.18e-21
AFAP1-AS1	AFAP1-AS1	254.808	3.98903	0.28045	14.2237	6.53e-46	9.03e-45
AFAP1L1	AFAP1L1	825.998	-1.65124	0.0837895	-19.707	1.88e-86	9.2e-85
AFF2	AFF2	89.4427	-1.10164	0.157167	-7.00932	2.39e-12	7.38e-12
AFP	AFP	138.434	-1.34424	0.304121	-4.42006	9.87e-06	1.91e-05
AGAP1-IT1	AGAP1-IT1	34.9306	2.57168	0.159001	16.174	7.69e-59	1.59e-57
AGMAT	AGMAT	150.819	1.47307	0.100168	14.706	5.9e-49	9.02e-48
AGMO	AGMO	37.4456	-2.38826	0.167468	-14.261	3.83e-46	5.32e-45
AGPAT2	AGPAT2	4084.72	-1.81968	0.103628	-17.5598	5.01e-69	1.46e-67
AGR2	AGR2	34312.8	2.49117	0.213618	11.6618	2e-31	1.58e-30
AGR3	AGR3	6480.81	2.45947	0.231219	10.637	2.01e-26	1.27e-25
AGRP	AGRP	4.58964	1.05568	0.143235	7.3703	1.7e-13	5.63e-13
AGT	AGT	1283.46	1.39779	0.206386	6.7727	1.26e-11	3.74e-11
AGXT	AGXT	13.7972	-1.00825	0.301235	-3.34705	0.000816765	0.00132427
AGXT2	AGXT2	13.9665	1.23133	0.207904	5.92257	3.17e-09	8.03e-09
AHNAK	AHNAK	98780.2	-1.59622	0.0871649	-18.3126	6.57e-75	2.31e-73
AIFM2	AIFM2	1549.42	-1.92635	0.0843303	-22.843	1.72e-115	1.82e-113
AIFM3	AIFM3	121.825	1.31267	0.117584	11.1636	6.15e-29	4.34e-28
AIM2	AIM2	139.897	1.92188	0.182556	10.5276	6.44e-26	3.99e-25
AJM1	AJM1	320.517	1.96235	0.112506	17.4421	3.95e-68	1.12e-66
AK3	AK3	3624.64	-1.01479	0.0583062	-17.4045	7.63e-68	2.13e-66
AK3P3	AK3P3	9.30633	-1.00897	0.112398	-8.97676	2.79e-19	1.26e-18
AK4	AK4	2986.95	-1.05707	0.127256	-8.30661	9.85e-17	3.89e-16
AK5	AK5	1138.65	-2.27878	0.194061	-11.7426	7.71e-32	6.18e-31
AK8	AK8	300.655	1.26064	0.110364	11.4225	3.23e-30	2.42e-29
AKAP12	AKAP12	3015.96	-2.79077	0.124961	-22.3332	1.76e-110	1.6e-108
AKAP14	AKAP14	8.68414	2.79551	0.325237	8.59531	8.3e-18	3.47e-17
AKAP5	AKAP5	606.398	1.43298	0.136981	10.4611	1.3e-25	7.93e-25
AKAP6	AKAP6	287.729	-2.38566	0.123512	-19.3152	4e-83	1.77e-81
AKR1C1	AKR1C1	1088.46	-3.5652	0.205344	-17.3621	1.6e-67	4.43e-66
AKR1C2	AKR1C2	1666.87	-3.15414	0.244344	-12.9086	4.02e-38	4.11e-37
AKR1C3	AKR1C3	1463.79	-2.43436	0.15085	-16.1375	1.39e-58	2.86e-57
AKR1C8	AKR1C8	2.99704	-1.23683	0.205554	-6.01709	1.78e-09	4.57e-09
AKR1D1	AKR1D1	16.83	-1.21855	0.255378	-4.77156	1.83e-06	3.76e-06
AKR7A3	AKR7A3	1565.83	2.5863	0.203959	12.6805	7.59e-37	7.4e-36
AKR7L	AKR7L	106.672	1.41114	0.139068	10.1471	3.41e-24	1.95e-23
ALAS2	ALAS2	8.77069	-3.6108	0.178886	-20.185	1.33e-90	7.33e-89
ALB	ALB	1074.62	-1.06887	0.30906	-3.45844	0.000543315	0.000897274
ALDH18A1	ALDH18A1	8165.36	1.0151	0.0564908	17.9693	3.39e-72	1.09e-70
ALDH1A1	ALDH1A1	1975.22	-2.54588	0.130768	-19.4687	2.02e-84	9.23e-83
ALDH1A2	ALDH1A2	244.338	-2.88536	0.154139	-18.7192	3.45e-78	1.35e-76
ALDH1A3	ALDH1A3	1309.04	-1.63323	0.144017	-11.3406	8.26e-30	6.07e-29
ALDH1A3-AS1	ALDH1A3-AS1	159.124	-1.50099	0.113306	-13.2472	4.68e-40	5.2e-39
ALDH1L1	ALDH1L1	542.958	-4.87203	0.201655	-24.1602	5.84e-129	8.37e-127
ALDH1L1-AS2	ALDH1L1-AS2	19.6193	-5.18085	0.259115	-19.9944	6.16e-89	3.23e-87
ALDH2	ALDH2	7540.29	-2.37659	0.11359	-20.9225	3.34e-97	2.19e-95
ALDH3A1	ALDH3A1	152.643	-1.38457	0.275107	-5.03286	4.83e-07	1.04e-06
ALDOA	ALDOA	91531	1.16203	0.0830906	13.9851	1.92e-44	2.53e-43
ALDOB	ALDOB	14.5539	-1.0976	0.163604	-6.70893	1.96e-11	5.74e-11
ALDOC	ALDOC	1355.78	-1.98656	0.151684	-13.0967	3.44e-39	3.67e-38
ALG1L11P	ALG1L11P	1.75858	-1.20867	0.185504	-6.51561	7.24e-11	2.05e-10
ALG1L1P	ALG1L1P	127.529	2.16987	0.206897	10.4877	9.84e-26	6.02e-25
ALG1L3P	ALG1L3P	6.82037	1.86576	0.265321	7.03207	2.03e-12	6.3e-12
ALG3	ALG3	3186.16	1.14086	0.0712391	16.0145	1.01e-57	2.04e-56
ALK	ALK	33.0848	-1.14772	0.187274	-6.12852	8.87e-10	2.33e-09
ALKAL2	ALKAL2	81.6517	-1.54948	0.274998	-5.63453	1.76e-08	4.22e-08
ALLC	ALLC	1.80989	-1.00935	0.256411	-3.93644	8.27e-05	0.000147427
ALOXE3	ALOXE3	70.2773	1.08447	0.178031	6.09145	1.12e-09	2.93e-09
ALOXE3P1	ALOXE3P1	8.96446	1.18509	0.304936	3.88635	0.000101761	0.000180116
ALPK3	ALPK3	755.078	-2.71475	0.107153	-25.3352	1.31e-141	2.53e-139
ALPL	ALPL	1544.58	-1.21849	0.157767	-7.72335	1.13e-14	4e-14
ALX3	ALX3	9.51549	1.7797	0.307449	5.78861	7.1e-09	1.75e-08
ALX4	ALX4	238.448	-2.40519	0.211452	-11.3746	5.59e-30	4.15e-29
ALYREF	ALYREF	3605.41	1.25212	0.0865901	14.4603	2.16e-47	3.12e-46
AMER2	AMER2	11.9623	2.11599	0.389157	5.43738	5.41e-08	1.25e-07
AMER3	AMER3	13.4119	4.30542	0.460143	9.3567	8.23e-21	4e-20
AMH	AMH	130.313	2.6626	0.197245	13.4989	1.59e-41	1.87e-40
AMMECR1	AMMECR1	1327.09	1.02834	0.0863929	11.9031	1.14e-32	9.49e-32
AMOTL1	AMOTL1	3136.76	-1.47694	0.105817	-13.9575	2.83e-44	3.7e-43
AMOTL2	AMOTL2	4718.44	-1.48909	0.0780652	-19.0749	4.08e-81	1.71e-79
AMPD1	AMPD1	40.2628	-2.00094	0.208288	-9.6066	7.5e-22	3.84e-21
AMTN	AMTN	16.5086	1.7924	0.34407	5.20941	1.89e-07	4.22e-07
AMY2B	AMY2B	306.012	-1.20913	0.119095	-10.1527	3.22e-24	1.84e-23
AMZ1	AMZ1	249.48	2.58908	0.17937	14.4343	3.15e-47	4.52e-46
ANAPC11	ANAPC11	4073.68	1.14419	0.0883856	12.9454	2.49e-38	2.57e-37
ANGPT1	ANGPT1	423.555	-2.83066	0.152082	-18.6128	2.53e-77	9.65e-76
ANGPT4	ANGPT4	44.1354	-3.55997	0.14629	-24.335	8.36e-131	1.22e-128
ANGPTL1	ANGPTL1	311.511	-3.25793	0.149979	-21.7225	1.26e-104	9.85e-103
ANGPTL2	ANGPTL2	5235.62	-1.89894	0.108128	-17.562	4.82e-69	1.41e-67
ANGPTL4	ANGPTL4	1400.86	-2.00083	0.171889	-11.6402	2.57e-31	2.03e-30
ANGPTL5	ANGPTL5	18.3915	-4.24111	0.210091	-20.187	1.27e-90	7.05e-89
ANGPTL6	ANGPTL6	25.445	1.26484	0.111532	11.3405	8.26e-30	6.07e-29
ANGPTL7	ANGPTL7	71.9318	-4.30522	0.273426	-15.7455	7.38e-56	1.4e-54
ANGPTL8	ANGPTL8	28.5042	-4.38597	0.186427	-23.5265	2.18e-122	2.74e-120
ANK2	ANK2	1115.18	-2.41477	0.122116	-19.7744	4.94e-87	2.44e-85
ANK3-DT	ANK3-DT	7.93712	1.30581	0.197161	6.62309	3.52e-11	1.01e-10
ANKDD1A	ANKDD1A	265.23	-1.48141	0.0717615	-20.6436	1.11e-94	6.83e-93
ANKDD1B	ANKDD1B	22.062	-1.37557	0.116692	-11.7881	4.5e-32	3.65e-31
ANKK1	ANKK1	53.1328	-1.30992	0.141577	-9.25237	2.2e-20	1.04e-19
ANKRD1	ANKRD1	37.6117	1.47992	0.222046	6.66494	2.65e-11	7.68e-11
ANKRD18B	ANKRD18B	12.7257	1.20548	0.300584	4.01044	6.06e-05	0.000109316
ANKRD20A1	ANKRD20A1	1.90008	-1.07998	0.205832	-5.24689	1.55e-07	3.47e-07
ANKRD20A18P	ANKRD20A18P	1.12519	1.14268	0.261996	4.36145	1.29e-05	2.48e-05
ANKRD20A4P	ANKRD20A4P	3.46886	-1.5166	0.211899	-7.1572	8.23e-13	2.62e-12
ANKRD22	ANKRD22	418.324	2.14301	0.135672	15.7955	3.34e-56	6.42e-55
ANKRD29	ANKRD29	391.205	-2.20176	0.146395	-15.0399	4.02e-51	6.59e-50
ANKRD30B	ANKRD30B	641.71	2.15692	0.262099	8.22938	1.88e-16	7.32e-16
ANKRD30BP1	ANKRD30BP1	42.9707	2.57101	0.279822	9.18801	4e-20	1.88e-19
ANKRD33B	ANKRD33B	346.419	-1.42616	0.125571	-11.3574	6.82e-30	5.03e-29
ANKRD34B	ANKRD34B	15.5489	1.70628	0.273299	6.24328	4.28e-10	1.15e-09
ANKRD35	ANKRD35	269.244	-1.29683	0.157339	-8.24227	1.69e-16	6.6e-16
ANKRD36C	ANKRD36C	225.303	-1.18278	0.107294	-11.0237	2.94e-28	2.02e-27
ANKRD40CL	ANKRD40CL	1.95651	1.49587	0.252433	5.9258	3.11e-09	7.88e-09
ANKRD53	ANKRD53	65.9364	-2.76609	0.112364	-24.6172	8.27e-134	1.29e-131
ANKRD62	ANKRD62	3.18289	1.40796	0.265947	5.29413	1.2e-07	2.71e-07
ANKRD65	ANKRD65	454.297	-1.18938	0.126353	-9.41318	4.81e-21	2.36e-20
ANLN	ANLN	2636.58	3.35471	0.129308	25.9436	2.15e-148	5.05e-146
ANO3	ANO3	124.314	-1.71324	0.259702	-6.59695	4.2e-11	1.2e-10
ANO6	ANO6	7051.38	-1.55369	0.069436	-22.3759	6.76e-111	6.19e-109
ANO7	ANO7	163.101	1.34756	0.142987	9.4243	4.33e-21	2.13e-20
ANO9	ANO9	1050.37	1.47419	0.113559	12.9817	1.55e-38	1.62e-37
ANTKMT	ANTKMT	844.439	1.75109	0.114737	15.2618	1.37e-52	2.37e-51
ANTXR2	ANTXR2	2659.86	-1.85648	0.0864875	-21.4653	3.29e-102	2.44e-100
ANTXRL	ANTXRL	25.8264	-1.52083	0.294664	-5.16124	2.45e-07	5.42e-07
ANXA1	ANXA1	11810.1	-2.32103	0.1134	-20.4677	4.18e-93	2.47e-91
ANXA10	ANXA10	6.0115	1.23191	0.22765	5.41141	6.25e-08	1.44e-07
ANXA3	ANXA3	1824.07	-1.22598	0.153588	-7.98228	1.44e-15	5.32e-15
ANXA8L1	ANXA8L1	201.487	-1.0163	0.239881	-4.23666	2.27e-05	4.26e-05
ANXA9	ANXA9	2412.44	1.75849	0.133232	13.1987	8.93e-40	9.8e-39
AOC1	AOC1	139.825	2.7278	0.220566	12.3673	3.93e-35	3.62e-34
AOC2	AOC2	79.5059	-2.48542	0.125563	-19.7942	3.34e-87	1.66e-85
AOC3	AOC3	4802.01	-4.07133	0.133432	-30.5124	1.78e-204	2.18e-201
AOC4P	AOC4P	13.8591	-3.39674	0.134832	-25.1923	4.86e-140	8.95e-138
AOX1	AOX1	955.618	-2.32903	0.171496	-13.5807	5.21e-42	6.26e-41
AP1M2	AP1M2	6420.03	1.58323	0.0891097	17.7672	1.27e-70	3.91e-69
AP1S1	AP1S1	3241.13	1.22141	0.064941	18.8079	6.5e-79	2.59e-77
AP1S3	AP1S3	293.222	1.05873	0.0937754	11.29	1.47e-29	1.07e-28
APBA1	APBA1	513.577	-1.27168	0.12397	-10.2579	1.09e-24	6.37e-24
APBB1IP	APBB1IP	1111.51	-1.34028	0.101274	-13.2341	5.57e-40	6.16e-39
APCDD1	APCDD1	1699.11	-2.20281	0.121255	-18.1668	9.46e-74	3.22e-72
APCDD1L	APCDD1L	430.952	-1.81685	0.198827	-9.13786	6.37e-20	2.96e-19
APCDD1L-DT	APCDD1L-DT	145.808	-2.21244	0.222132	-9.96	2.28e-23	1.25e-22
APLP1	APLP1	831.173	2.52693	0.18659	13.5427	8.75e-42	1.04e-40
APOA1	APOA1	20.6944	2.10594	0.209972	10.0297	1.13e-23	6.28e-23
APOA5	APOA5	2.76054	1.77359	0.332439	5.33507	9.55e-08	2.18e-07
APOB	APOB	110.168	-5.6222	0.235867	-23.8363	1.4e-125	1.88e-123
APOBEC3A	APOBEC3A	81.9788	1.65194	0.20125	8.20841	2.24e-16	8.68e-16
APOBEC3B	APOBEC3B	642.407	2.60724	0.164827	15.8181	2.34e-56	4.52e-55
APOBEC3H	APOBEC3H	46.4724	1.04704	0.136587	7.66576	1.78e-14	6.21e-14
APOBR	APOBR	1065.08	1.37761	0.129308	10.6537	1.68e-26	1.07e-25
APOC1	APOC1	3339.77	1.04499	0.129133	8.09237	5.85e-16	2.22e-15
APOC2	APOC2	12.4422	1.33991	0.147318	9.09534	9.43e-20	4.34e-19
APOC4-APOC2	APOC4-APOC2	5.36612	1.10458	0.161352	6.84578	7.61e-12	2.28e-11
APOD	APOD	34891.9	-1.48193	0.23166	-6.39699	1.58e-10	4.38e-10
APOF	APOF	38.9541	1.31004	0.237543	5.51498	3.49e-08	8.2e-08
APOL5	APOL5	3.17439	-1.31781	0.162447	-8.11228	4.97e-16	1.89e-15
APOLD1	APOLD1	2570.8	-2.16619	0.112418	-19.2692	9.75e-83	4.27e-81
APOO	APOO	1003.88	1.1267	0.0701566	16.0598	4.88e-58	9.94e-57
APPAT	APPAT	34.2158	1.16339	0.122656	9.48494	2.43e-21	1.21e-20
AQP1	AQP1	9845.11	-2.10784	0.111234	-18.9497	4.44e-80	1.83e-78
AQP4	AQP4	63.2918	-1.34784	0.216706	-6.21967	4.98e-10	1.33e-09
AQP7	AQP7	962.67	-5.23401	0.222851	-23.4866	5.6e-122	6.84e-120
AQP7B	AQP7B	20.9917	-5.52593	0.243021	-22.7385	1.87e-114	1.93e-112
AQP7P1	AQP7P1	23.8322	-5.26114	0.22154	-23.7481	1.15e-124	1.5e-122
ARAP3	ARAP3	984.631	-1.2431	0.0774712	-16.0459	6.1e-58	1.24e-56
ARF1	ARF1	40981.7	1.0578	0.0537878	19.6663	4.2e-86	2.03e-84
ARF4P2	ARF4P2	2.39836	2.08004	0.236838	8.78256	1.6e-18	6.95e-18
ARFGAP1	ARFGAP1	5656.37	1.07377	0.0722946	14.8528	6.68e-50	1.05e-48
ARHGAP10	ARHGAP10	943.692	-1.43396	0.091915	-15.601	7.17e-55	1.32e-53
ARHGAP11A	ARHGAP11A	1271.96	2.22785	0.107021	20.8171	3.03e-96	1.93e-94
ARHGAP11A-DT	ARHGAP11A-DT	5.42056	-1.00718	0.0895108	-11.2521	2.26e-29	1.64e-28
ARHGAP11B-DT	ARHGAP11B-DT	4.36848	-1.03495	0.0984492	-10.5126	7.56e-26	4.66e-25
ARHGAP20	ARHGAP20	248.607	-3.14047	0.118913	-26.4098	1.06e-153	2.83e-151
ARHGAP24	ARHGAP24	642.57	-1.34593	0.0861697	-15.6195	5.36e-55	9.93e-54
ARHGAP26	ARHGAP26	1490.04	-1.11165	0.10467	-10.6205	2.39e-26	1.51e-25
ARHGAP28-AS1	ARHGAP28-AS1	5.07587	-1.25637	0.199561	-6.29568	3.06e-10	8.3e-10
ARHGAP29-AS1	ARHGAP29-AS1	35.1395	3.07763	0.226302	13.5996	4.03e-42	4.86e-41
ARHGAP31	ARHGAP31	2388.34	-1.19786	0.0814914	-14.6992	6.52e-49	9.97e-48
ARHGAP36	ARHGAP36	286.955	-1.83214	0.413299	-4.43297	9.29e-06	1.8e-05
ARHGAP39	ARHGAP39	1573.97	1.66987	0.0856812	19.4893	1.35e-84	6.21e-83
ARHGAP42	ARHGAP42	538.195	-1.04104	0.106212	-9.80146	1.11e-22	5.91e-22
ARHGAP42P2	ARHGAP42P2	2.92846	1.09259	0.244102	4.47598	7.61e-06	1.49e-05
ARHGAP5-AS1	ARHGAP5-AS1	159.559	-1.07783	0.0903785	-11.9257	8.69e-33	7.27e-32
ARHGAP6	ARHGAP6	269.539	-1.37975	0.11103	-12.4269	1.87e-35	1.74e-34
ARHGEF10	ARHGEF10	1791.91	-1.04207	0.0713323	-14.6086	2.47e-48	3.69e-47
ARHGEF15	ARHGEF15	1029.65	-1.88047	0.0933595	-20.1423	3.15e-90	1.71e-88
ARHGEF16	ARHGEF16	1490.15	1.16264	0.0887033	13.1071	3e-39	3.21e-38
ARHGEF26-AS1	ARHGEF26-AS1	135.528	1.22919	0.150921	8.14459	3.81e-16	1.46e-15
ARHGEF28	ARHGEF28	1306.41	-1.1424	0.0869826	-13.1337	2.11e-39	2.28e-38
ARHGEF39	ARHGEF39	382.285	1.75161	0.0986307	17.7593	1.46e-70	4.49e-69
ARHGEF4	ARHGEF4	395.495	-1.24947	0.151751	-8.23369	1.82e-16	7.07e-16
ARHGEF4-AS1	ARHGEF4-AS1	10.1866	1.46339	0.300709	4.86647	1.14e-06	2.38e-06
ARHGEF40	ARHGEF40	3035.81	-1.31125	0.0706372	-18.5631	6.39e-77	2.4e-75
ARHGEF6	ARHGEF6	3953.97	-1.48787	0.106653	-13.9505	3.12e-44	4.07e-43
ARHGEF7-AS2	ARHGEF7-AS2	2.49436	-3.15346	0.158116	-19.9439	1.69e-88	8.78e-87
ARID5A	ARID5A	2645.15	-1.02134	0.106727	-9.56968	1.07e-21	5.45e-21
ARID5B	ARID5B	5071.89	-1.54279	0.083269	-18.5278	1.23e-76	4.59e-75
11	11	263.369	1.1708	0.114686	10.2087	1.81e-24	1.05e-23
14	14	4.90449	2.78931	0.359485	7.75917	8.55e-15	3.04e-14
ARL4A	ARL4A	1289.47	-1.50998	0.0984987	-15.33	4.82e-53	8.47e-52
ARL6IP1P2	ARL6IP1P2	1.17346	1.30403	0.24425	5.33894	9.35e-08	2.13e-07
9	9	118.808	1.32557	0.183905	7.20789	5.68e-13	1.82e-12
ARMC2-AS1	ARMC2-AS1	1.42646	-1.262	0.18625	-6.77583	1.24e-11	3.66e-11
ARMC3	ARMC3	152.838	2.95064	0.195748	15.0737	2.41e-51	3.98e-50
ARMS2	ARMS2	1.54565	-1.62883	0.169728	-9.59666	8.26e-22	4.22e-21
ARMT1	ARMT1	7181.7	1.50872	0.144821	10.4178	2.06e-25	1.24e-24
ARNT2	ARNT2	4021.53	2.02638	0.150098	13.5004	1.56e-41	1.83e-40
ARNT2-DT	ARNT2-DT	368.121	1.65327	0.159293	10.3788	3.1e-25	1.85e-24
ARPC1B	ARPC1B	8373.79	1.03581	0.0854916	12.116	8.69e-34	7.59e-33
ARRDC1	ARRDC1	3625.9	1.14858	0.077739	14.7748	2.13e-49	3.3e-48
ARRDC3	ARRDC3	5924.18	-1.39876	0.0819212	-17.0744	2.3e-65	5.95e-64
ARSI	ARSI	298.216	1.51579	0.13525	11.2073	3.76e-29	2.68e-28
ART1	ART1	3.80616	1.82474	0.283431	6.43805	1.21e-10	3.37e-10
ART3	ART3	246.603	2.78756	0.317309	8.78502	1.56e-18	6.8e-18
ART4	ART4	55.5108	-1.47031	0.229129	-6.41692	1.39e-10	3.86e-10
ART5	ART5	36.6451	-1.0925	0.151639	-7.20459	5.82e-13	1.87e-12
ARTN	ARTN	275.437	3.23024	0.164111	19.6832	3e-86	1.47e-84
ARX	ARX	68.4299	1.79781	0.286061	6.28468	3.29e-10	8.89e-10
ASB11	ASB11	1.73635	-1.55057	0.240778	-6.43986	1.2e-10	3.34e-10
ASB13	ASB13	4391.53	1.00417	0.0907864	11.0608	1.94e-28	1.34e-27
ASB15	ASB15	5.6204	1.06733	0.287934	3.70685	0.000209856	0.000360827
ASB16	ASB16	135.669	1.25612	0.118342	10.6143	2.56e-26	1.61e-25
ASB4	ASB4	16.154	-1.34888	0.209391	-6.44192	1.18e-10	3.29e-10
ASCL1	ASCL1	233.963	6.50068	0.408901	15.8979	6.55e-57	1.29e-55
ASCL2	ASCL2	276.184	2.53494	0.179902	14.0907	4.33e-45	5.84e-44
ASCL4	ASCL4	12.58	2.84082	0.298382	9.52075	1.72e-21	8.63e-21
ASCL5	ASCL5	6.87864	1.1911	0.17569	6.77953	1.21e-11	3.57e-11
ASF1B	ASF1B	1563.13	3.0531	0.102517	29.7813	6.81e-195	6.31e-192
ASH1L-IT1	ASH1L-IT1	1.13667	1.24062	0.243982	5.08488	3.68e-07	8.01e-07
ASIC2	ASIC2	61.4215	1.79327	0.275978	6.49785	8.15e-11	2.3e-10
ASIC3	ASIC3	132.25	1.65747	0.137062	12.0928	1.15e-33	1e-32
ASIC4	ASIC4	10.832	1.00539	0.171217	5.872	4.31e-09	1.08e-08
ASNS	ASNS	2099.14	1.06698	0.101004	10.5638	4.39e-26	2.74e-25
ASPA	ASPA	148.286	-3.66717	0.141111	-25.9878	6.8e-149	1.64e-146
ASPH	ASPH	18612.8	-1.05551	0.110472	-9.55455	1.24e-21	6.28e-21
ASPHD1	ASPHD1	310.977	1.70322	0.179641	9.48123	2.51e-21	1.25e-20
ASPHD2	ASPHD2	251.283	1.06533	0.082599	12.8976	4.64e-38	4.73e-37
ASPM	ASPM	1866.85	3.51409	0.131583	26.7062	3.99e-157	1.15e-154
ASPN	ASPN	6853.29	1.82355	0.168748	10.8063	3.21e-27	2.1e-26
ASPSCR1	ASPSCR1	1994.31	1.08707	0.0818463	13.2818	2.95e-40	3.3e-39
ASS1P11	ASS1P11	3.09525	-1.00131	0.308205	-3.24884	0.00115875	0.00185141
ASTL	ASTL	23.2888	1.10493	0.15876	6.95974	3.41e-12	1.04e-11
ASTN1	ASTN1	90.6249	-2.08862	0.195463	-10.6855	1.19e-26	7.62e-26
ASXL3	ASXL3	61.1882	-1.5072	0.185481	-8.12592	4.44e-16	1.69e-15
ATAD2	ATAD2	5103.93	1.95074	0.107458	18.1535	1.2e-73	4.08e-72
ATAD3A	ATAD3A	1318.74	1.00684	0.0924982	10.885	1.36e-27	9.05e-27
ATF3	ATF3	3269.25	-1.9636	0.15151	-12.9603	2.06e-38	2.13e-37
ATF6-DT	ATF6-DT	2.63552	-1.41609	0.121328	-11.6715	1.78e-31	1.41e-30
ATG9B	ATG9B	207.624	1.7491	0.136842	12.7819	2.07e-37	2.05e-36
ATOH8	ATOH8	275.144	-3.35836	0.155742	-21.5637	3.94e-103	3e-101
ATP13A3-DT	ATP13A3-DT	119.31	1.07388	0.124347	8.63615	5.81e-18	2.45e-17
ATP13A4	ATP13A4	447.754	-1.17322	0.223607	-5.24677	1.55e-07	3.47e-07
ATP13A5	ATP13A5	363.48	-1.61728	0.26244	-6.16247	7.16e-10	1.89e-09
ATP1A2	ATP1A2	889.523	-4.6435	0.225199	-20.6196	1.83e-94	1.12e-92
ATP1A3	ATP1A3	245.902	3.53809	0.208373	16.9796	1.16e-64	2.94e-63
ATP1A4	ATP1A4	283.256	1.24681	0.218512	5.7059	1.16e-08	2.82e-08
ATP1B2	ATP1B2	167.756	-1.46711	0.120731	-12.1519	5.6e-34	4.93e-33
ATP2A1-AS1	ATP2A1-AS1	47.4039	2.13664	0.135211	15.8023	3e-56	5.77e-55
ATP2A3	ATP2A3	6046.99	1.59293	0.13594	11.7179	1.03e-31	8.24e-31
ATP2B3	ATP2B3	7.59459	1.59508	0.284443	5.60774	2.05e-08	4.9e-08
ATP2B4	ATP2B4	10389	-1.13508	0.0815725	-13.915	5.14e-44	6.64e-43
ATP2C2	ATP2C2	1150.32	1.24504	0.134801	9.2361	2.56e-20	1.21e-19
ATP4B	ATP4B	2.28614	1.05671	0.259301	4.07524	4.6e-05	8.39e-05
ATP5F1EP2	ATP5F1EP2	19.6167	1.23672	0.139351	8.87488	7e-19	3.1e-18
ATP5MC1P4	ATP5MC1P4	16.3566	2.44105	0.157825	15.4668	5.82e-54	1.05e-52
ATP5MFP2	ATP5MFP2	10.4851	1.42808	0.255113	5.59782	2.17e-08	5.19e-08
ATP5PBP5	ATP5PBP5	44.5514	-1.21124	0.137064	-8.83703	9.83e-19	4.32e-18
ATP5PBP8	ATP5PBP8	1.31331	-1.11526	0.199028	-5.60352	2.1e-08	5.02e-08
ATP6AP1	ATP6AP1	17595.3	1.22953	0.0639047	19.24	1.71e-82	7.46e-81
ATP6V0B	ATP6V0B	8478.76	1.37216	0.0684103	20.0577	1.73e-89	9.21e-88
ATP7B	ATP7B	1589.91	1.02047	0.132223	7.71782	1.18e-14	4.17e-14
ATP8B3	ATP8B3	186.694	1.10142	0.128832	8.54927	1.24e-17	5.13e-17
ATP8B4	ATP8B4	293.732	-1.4656	0.10457	-14.0154	1.25e-44	1.66e-43
ATRNL1	ATRNL1	564.812	1.29762	0.23992	5.40856	6.35e-08	1.47e-07
AUNIP	AUNIP	250.835	2.21748	0.113711	19.501	1.08e-84	4.96e-83
AURKA	AURKA	1499.68	3.09384	0.117738	26.2774	3.48e-152	8.94e-150
AURKB	AURKB	797.567	3.35464	0.136743	24.5323	6.67e-133	1.02e-130
AVPI1	AVPI1	665.456	-1.24089	0.0930811	-13.3313	1.52e-40	1.72e-39
AVPR1A	AVPR1A	463.666	-1.71647	0.115129	-14.9092	2.87e-50	4.58e-49
AVPR2	AVPR2	91.7327	-2.80335	0.154512	-18.1432	1.45e-73	4.88e-72
AWAT1	AWAT1	3.60619	1.00541	0.308175	3.26248	0.00110443	0.0017686
AXDND1	AXDND1	19.4292	1.46994	0.16501	8.9082	5.19e-19	2.31e-18
AZGP1P1	AZGP1P1	365.659	1.36332	0.180411	7.55675	4.13e-14	1.42e-13
AZU1	AZU1	69.5104	1.58477	0.227654	6.96132	3.37e-12	1.03e-11
B3GALT1	B3GALT1	38.4373	-3.18441	0.188178	-16.9224	3.08e-64	7.68e-63
B3GALT2	B3GALT2	19.1675	-1.03556	0.135061	-7.66732	1.76e-14	6.14e-14
B3GAT1	B3GAT1	180.683	-1.20795	0.235118	-5.13765	2.78e-07	6.12e-07
B3GAT1-DT	B3GAT1-DT	39.3081	-2.04114	0.293241	-6.96061	3.39e-12	1.04e-11
B3GNT4	B3GNT4	49.0394	1.00335	0.126238	7.94806	1.89e-15	6.97e-15
B4GALNT1	B4GALNT1	350.204	1.23282	0.153239	8.04504	8.62e-16	3.23e-15
B4GALNT2	B4GALNT2	146.386	2.04983	0.258142	7.94071	2.01e-15	7.39e-15
B4GALNT3	B4GALNT3	1870.88	1.75275	0.145713	12.0288	2.51e-33	2.15e-32
B4GALNT4	B4GALNT4	1858.04	1.92661	0.120452	15.9949	1.39e-57	2.79e-56
B4GALT1-AS1	B4GALT1-AS1	61.2758	-1.71769	0.089028	-19.2938	6.05e-83	2.67e-81
B4GALT3	B4GALT3	4702.48	1.22105	0.066601	18.3339	4.44e-75	1.58e-73
B4GALT6	B4GALT6	237.791	-1.20881	0.0974224	-12.4079	2.37e-35	2.2e-34
BACH2	BACH2	380.013	-1.39338	0.121177	-11.4987	1.34e-30	1.02e-29
BAIAP2L1	BAIAP2L1	2491.51	1.12824	0.0810579	13.919	4.86e-44	6.28e-43
BAIAP2L2	BAIAP2L2	134.916	1.20942	0.164644	7.34564	2.05e-13	6.74e-13
BAIAP3	BAIAP3	1197.47	1.10338	0.17158	6.43069	1.27e-10	3.54e-10
BAK1P2	BAK1P2	6.92402	1.71098	0.26807	6.38257	1.74e-10	4.8e-10
BAMBI	BAMBI	5088.48	1.45238	0.162581	8.93332	4.13e-19	1.85e-18
BANK1	BANK1	253.817	-1.30078	0.190996	-6.81053	9.72e-12	2.89e-11
BARD1	BARD1	1061.72	1.20817	0.0759446	15.9086	5.53e-57	1.09e-55
BARX1	BARX1	66.4711	1.68002	0.256293	6.5551	5.56e-11	1.58e-10
BASP1	BASP1	2459.02	1.23241	0.107129	11.5039	1.26e-30	9.62e-30
BATF	BATF	808.295	1.214	0.124647	9.73954	2.04e-22	1.07e-21
BATF2	BATF2	466.333	1.12399	0.159101	7.06462	1.61e-12	5.02e-12
BAX	BAX	2498.36	1.17081	0.0707394	16.5511	1.57e-61	3.58e-60
BBC3	BBC3	742.123	1.33671	0.1004	13.3139	1.92e-40	2.16e-39
BBOX1	BBOX1	489.048	-1.98358	0.237625	-8.34753	6.97e-17	2.78e-16
BBOX1-AS1	BBOX1-AS1	16.4131	1.13324	0.201339	5.62849	1.82e-08	4.36e-08
BCAN-AS1	BCAN-AS1	241.379	1.9694	0.230314	8.55095	1.22e-17	5.06e-17
BCAN-AS2	BCAN-AS2	78.2768	1.46544	0.196721	7.44932	9.38e-14	3.15e-13
BCAR4	BCAR4	11.341	3.97664	0.375714	10.5842	3.53e-26	2.21e-25
BCAS1	BCAS1	2527.57	2.47624	0.201839	12.2684	1.34e-34	1.21e-33
BCAS2P2	BCAS2P2	4.93471	1.05786	0.206379	5.1258	2.96e-07	6.5e-07
BCAS4	BCAS4	1900.61	2.08518	0.115748	18.0148	1.49e-72	4.83e-71
BCL2A1	BCL2A1	270.3	1.37419	0.166707	8.24312	1.68e-16	6.55e-16
BCL2L12	BCL2L12	960.58	1.27037	0.0868051	14.6348	1.69e-48	2.54e-47
BCL3	BCL3	3939.36	1.06875	0.0789433	13.5382	9.31e-42	1.11e-40
BCL6	BCL6	4099.23	-1.19147	0.0815662	-14.6074	2.52e-48	3.76e-47
BCL9	BCL9	3852.77	1.2275	0.0689983	17.7903	8.41e-71	2.6e-69
BCRP2	BCRP2	23.5329	1.79028	0.209296	8.55385	1.19e-17	4.94e-17
BET1P1	BET1P1	1.47216	-1.76478	0.196533	-8.97959	2.72e-19	1.23e-18
BEX1	BEX1	669.821	3.35932	0.322838	10.4056	2.34e-25	1.41e-24
BFSP2	BFSP2	25.5183	1.99281	0.206725	9.63993	5.42e-22	2.79e-21
BFSP2-AS1	BFSP2-AS1	12.4827	1.51397	0.260645	5.80855	6.3e-09	1.56e-08
BGN	BGN	44707.1	2.32054	0.10607	21.8774	4.27e-106	3.45e-104
BHLHA15	BHLHA15	56.3813	1.43628	0.177567	8.08867	6.03e-16	2.29e-15
BHLHE41	BHLHE41	3076.46	-1.12091	0.118046	-9.49555	2.19e-21	1.09e-20
BHMT2	BHMT2	368.096	-3.26353	0.1416	-23.0474	1.56e-117	1.75e-115
BICDL1	BICDL1	1413.54	2.67565	0.104676	25.5612	4.12e-144	8.69e-142
BICDL2	BICDL2	1789.94	1.03416	0.115634	8.9434	3.77e-19	1.69e-18
BICDL3P	BICDL3P	79.5589	1.36743	0.166289	8.22317	1.98e-16	7.7e-16
BIK	BIK	782.864	1.66842	0.123001	13.5642	6.53e-42	7.82e-41
BIN1	BIN1	1478.04	-1.72403	0.118487	-14.5504	5.81e-48	8.56e-47
BIRC5	BIRC5	2814.32	3.54099	0.138336	25.597	1.65e-144	3.52e-142
BLK	BLK	84.083	1.54523	0.226633	6.81818	9.22e-12	2.75e-11
BLM	BLM	617.285	1.99119	0.108947	18.2766	1.27e-74	4.45e-73
BLNK	BLNK	1112.3	1.01837	0.0859068	11.8544	2.04e-32	1.68e-31
BLOC1S5-TXNDC5	BLOC1S5-TXNDC5	19.2849	-1.56409	0.160897	-9.72109	2.45e-22	1.28e-21
BLVRBP1	BLVRBP1	5.90924	-1.05905	0.105578	-10.031	1.11e-23	6.2e-23
BLZF2P	BLZF2P	1.27689	-1.44064	0.197808	-7.28301	3.26e-13	1.06e-12
BMP2	BMP2	192.552	-2.19309	0.162036	-13.5345	9.78e-42	1.16e-40
BMP3	BMP3	58.0695	-4.34576	0.274281	-15.8442	1.54e-56	3.01e-55
BMP5	BMP5	132.39	-1.52086	0.270401	-5.62444	1.86e-08	4.47e-08
BMP6	BMP6	301.238	-1.92372	0.148272	-12.9743	1.71e-38	1.78e-37
BMP8A	BMP8A	74.7853	2.35934	0.118677	19.8803	6.03e-88	3.06e-86
BMP8B	BMP8B	509.907	1.08972	0.13689	7.96055	1.71e-15	6.32e-15
BMPER	BMPER	146.087	-2.0901	0.201208	-10.3878	2.82e-25	1.69e-24
BMPR1AP2	BMPR1AP2	2.30094	-1.21351	0.196799	-6.16623	6.99e-10	1.85e-09
BMPR1B	BMPR1B	10999.9	4.44535	0.264059	16.8347	1.36e-63	3.33e-62
BMPR1B-DT	BMPR1B-DT	70.2944	4.67244	0.345694	13.5161	1.26e-41	1.48e-40
BMX	BMX	107.229	-2.65037	0.142989	-18.5355	1.07e-76	3.99e-75
BNC1	BNC1	87.6509	-1.25057	0.242585	-5.15516	2.53e-07	5.59e-07
BNIP3P11	BNIP3P11	65.9668	1.03037	0.118722	8.67882	4e-18	1.7e-17
BNIP3P17	BNIP3P17	23.3871	1.49064	0.14451	10.3151	6.02e-25	3.56e-24
BNIP5	BNIP5	3.5248	2.94738	0.306431	9.6184	6.69e-22	3.43e-21
BNIPL	BNIPL	2059.34	1.16964	0.15192	7.69906	1.37e-14	4.82e-14
BOC	BOC	1770.89	-1.6414	0.134694	-12.1861	3.69e-34	3.27e-33
BOK	BOK	2578.09	-1.34974	0.0933535	-14.4584	2.22e-47	3.2e-46
BOK-AS1	BOK-AS1	7.29492	-2.81678	0.233562	-12.0601	1.72e-33	1.48e-32
BOLA2B	BOLA2B	28.5102	1.68392	0.127045	13.2545	4.25e-40	4.72e-39
BOLA2P3	BOLA2P3	3.37453	1.97074	0.235117	8.38196	5.21e-17	2.09e-16
BOLL	BOLL	2.04392	1.47054	0.283474	5.18757	2.13e-07	4.73e-07
1	1	3917.83	1.50661	0.108356	13.9042	5.97e-44	7.69e-43
BPIFB1	BPIFB1	1741.95	3.57338	0.262416	13.6172	3.16e-42	3.83e-41
BPIFB2	BPIFB2	585.896	1.44987	0.29391	4.93304	8.1e-07	1.72e-06
BRCA1	BRCA1	1205.76	1.07234	0.0967731	11.081	1.55e-28	1.08e-27
BRCA2	BRCA2	681.836	1.55042	0.0982611	15.7785	4.37e-56	8.35e-55
BRDT	BRDT	26.4388	1.94042	0.275303	7.04831	1.81e-12	5.62e-12
BRI3BP	BRI3BP	2276.89	1.10094	0.0721466	15.2598	1.42e-52	2.44e-51
BRICD5	BRICD5	171.58	1.22746	0.118872	10.3259	5.38e-25	3.19e-24
BRINP1	BRINP1	220.545	-1.76081	0.230068	-7.65344	1.96e-14	6.82e-14
BRINP2	BRINP2	371.21	1.58405	0.276537	5.72816	1.02e-08	2.48e-08
BRINP3	BRINP3	364.451	3.55232	0.422676	8.40434	4.3e-17	1.73e-16
BRINP3-DT	BRINP3-DT	12.2925	2.51378	0.38366	6.55211	5.67e-11	1.62e-10
BRIP1	BRIP1	697.058	2.21098	0.118964	18.5852	4.23e-77	1.6e-75
BRSK1	BRSK1	410.149	1.10511	0.120594	9.16391	5.01e-20	2.34e-19
BRSK2	BRSK2	156.653	2.8473	0.2121	13.4243	4.36e-41	5.04e-40
BSG-AS1	BSG-AS1	122.116	2.52241	0.142477	17.704	3.91e-70	1.18e-68
BSN-DT	BSN-DT	6.12235	1.56482	0.21847	7.1626	7.92e-13	2.52e-12
BSND	BSND	5.94164	1.14571	0.228241	5.01972	5.17e-07	1.11e-06
BST1	BST1	330.936	-1.19473	0.08642	-13.8247	1.81e-43	2.3e-42
BST2	BST2	13344.5	1.33664	0.134955	9.90428	3.99e-23	2.17e-22
BTG1-DT	BTG1-DT	36.602	-1.1346	0.135453	-8.37629	5.46e-17	2.19e-16
BTG2-DT	BTG2-DT	18.9017	1.82103	0.15403	11.8226	2.98e-32	2.43e-31
BTN1A1	BTN1A1	11.1435	-1.68977	0.19616	-8.61425	7.04e-18	2.96e-17
BTNL10P	BTNL10P	22.656	2.01035	0.17444	11.5246	9.92e-31	7.6e-30
BTNL2	BTNL2	3.08404	-1.9103	0.20033	-9.53575	1.49e-21	7.5e-21
BTNL9	BTNL9	983.439	-4.08052	0.152334	-26.7866	4.63e-158	1.39e-155
BUB1	BUB1	1564.11	3.2768	0.119853	27.3401	1.42e-164	4.97e-162
BUB1B	BUB1B	1168.99	2.9377	0.112076	26.2117	1.96e-151	4.98e-149
BUB3	BUB3	8829.1	1.07874	0.0651186	16.5658	1.23e-61	2.81e-60
BVES	BVES	242.54	-1.1221	0.11833	-9.48284	2.47e-21	1.23e-20
BVES-AS1	BVES-AS1	7.80528	-1.3569	0.18052	-7.5166	5.62e-14	1.91e-13
BZW1-AS1	BZW1-AS1	1.60458	1.0569	0.264808	3.99119	6.57e-05	0.000118193
C10orf105	C10orf105	5.55645	-1.03701	0.167672	-6.18476	6.22e-10	1.65e-09
C10orf67	C10orf67	9.37632	1.94791	0.272464	7.14922	8.73e-13	2.77e-12
C10orf82	C10orf82	312.799	2.23665	0.272684	8.20235	2.36e-16	9.12e-16
C10orf88B	C10orf88B	43.7139	1.90785	0.134901	14.1426	2.08e-45	2.82e-44
C10orf90	C10orf90	74.3151	-2.46624	0.244546	-10.085	6.44e-24	3.63e-23
C10orf95	C10orf95	46.9845	1.17097	0.100713	11.6268	3.01e-31	2.36e-30
C11orf16	C11orf16	30.1345	1.16537	0.210978	5.52368	3.32e-08	7.82e-08
C11orf87	C11orf87	4.03134	-2.79994	0.20344	-13.763	4.26e-43	5.33e-42
C11orf96	C11orf96	776.25	-1.23484	0.130133	-9.48908	2.33e-21	1.16e-20
C11orf98	C11orf98	203.728	1.05243	0.0855296	12.3049	8.52e-35	7.74e-34
C12orf42	C12orf42	10.047	1.16822	0.20847	5.60377	2.1e-08	5.01e-08
C12orf54	C12orf54	11.8246	-1.56418	0.149798	-10.4419	1.6e-25	9.67e-25
C12orf56	C12orf56	21.8595	2.1619	0.302295	7.15162	8.58e-13	2.72e-12
C14orf180	C14orf180	188.042	-5.25328	0.289643	-18.1371	1.62e-73	5.42e-72
C15orf48	C15orf48	1651.9	1.99658	0.159246	12.5377	4.64e-36	4.43e-35
C16orf92	C16orf92	3.31518	2.6803	0.285458	9.38947	6.03e-21	2.95e-20
C19orf12	C19orf12	1735.98	-1.34701	0.0724176	-18.6005	3.18e-77	1.21e-75
C19orf33	C19orf33	1053.97	2.81409	0.201553	13.962	2.66e-44	3.48e-43
C19orf48P	C19orf48P	3388.72	1.18326	0.0867439	13.6409	2.29e-42	2.79e-41
C19orf81	C19orf81	10.028	1.49681	0.248895	6.01383	1.81e-09	4.67e-09
C19orf84	C19orf84	8.1454	1.26534	0.160502	7.88365	3.18e-15	1.15e-14
C1DP5	C1DP5	2.5932	-2.40221	0.169384	-14.182	1.18e-45	1.62e-44
C1GALT1C1L	C1GALT1C1L	47.8998	-1.31421	0.127224	-10.3299	5.16e-25	3.06e-24
C1orf105	C1orf105	7.45375	3.10646	0.292757	10.6111	2.65e-26	1.67e-25
C1orf112	C1orf112	785.304	1.34778	0.0764191	17.6367	1.29e-69	3.85e-68
C1orf115	C1orf115	3347.01	-1.22934	0.122624	-10.0253	1.18e-23	6.56e-23
C1orf127	C1orf127	45.8	1.58924	0.153043	10.3843	2.92e-25	1.75e-24
C1orf167	C1orf167	25.4613	2.40734	0.267462	9.0007	2.24e-19	1.01e-18
C1orf21-DT	C1orf21-DT	25.7496	1.09083	0.140158	7.78285	7.09e-15	2.53e-14
C1orf220	C1orf220	65.7937	1.1383	0.113517	10.0275	1.15e-23	6.42e-23
C1orf35	C1orf35	1457.97	1.19919	0.0812302	14.7629	2.54e-49	3.93e-48
C1orf53	C1orf53	108.584	1.13475	0.110853	10.2366	1.36e-24	7.91e-24
C1QL1	C1QL1	82.5866	1.07708	0.181132	5.94638	2.74e-09	6.97e-09
C1QL4	C1QL4	45.4188	1.09476	0.261013	4.19426	2.74e-05	5.1e-05
C1QTNF1	C1QTNF1	2207.09	-1.74268	0.116159	-15.0026	7.06e-51	1.15e-49
C1QTNF1-AS1	C1QTNF1-AS1	3.97476	-1.59613	0.216524	-7.37161	1.69e-13	5.58e-13
C1QTNF6	C1QTNF6	2701.14	2.21189	0.0976986	22.6399	1.75e-113	1.77e-111
C1QTNF7	C1QTNF7	206.58	-2.63521	0.174438	-15.1069	1.46e-51	2.43e-50
C1QTNF9	C1QTNF9	19.626	-3.69602	0.16344	-22.6139	3.16e-113	3.17e-111
C20orf141	C20orf141	2.60738	1.16377	0.320225	3.63423	0.000278811	0.000473423
C20orf144	C20orf144	23.4959	1.65554	0.105659	15.6687	2.48e-55	4.63e-54
C20orf203	C20orf203	12.3606	-1.412	0.154139	-9.16056	5.16e-20	2.41e-19
C20orf204	C20orf204	139.094	2.40583	0.145129	16.5771	1.02e-61	2.34e-60
C21orf58	C21orf58	565.913	1.67454	0.0928722	18.0306	1.12e-72	3.65e-71
C21orf62	C21orf62	6.98648	-1.51827	0.123835	-12.2604	1.48e-34	1.33e-33
C22orf23	C22orf23	111.973	-1.06035	0.105763	-10.0258	1.17e-23	6.53e-23
C2CD2	C2CD2	2663.75	-1.80167	0.0842664	-21.3807	2.02e-101	1.47e-99
C2CD4A	C2CD4A	260.913	1.85291	0.261586	7.08337	1.41e-12	4.4e-12
C2CD4B	C2CD4B	130.184	-2.08695	0.197092	-10.5887	3.36e-26	2.11e-25
C2CD4D	C2CD4D	123.096	1.40829	0.12549	11.2223	3.17e-29	2.28e-28
C2orf15	C2orf15	328.15	1.00688	0.0784555	12.8338	1.06e-37	1.06e-36
C2orf50	C2orf50	84.1552	1.89287	0.18037	10.4944	9.16e-26	5.62e-25
C2orf73	C2orf73	18.0898	-1.04368	0.161598	-6.45851	1.06e-10	2.96e-10
C2orf88	C2orf88	277.208	-2.33082	0.153941	-15.141	8.68e-52	1.45e-50
C3	C3	34400.6	-1.14323	0.126685	-9.02414	1.81e-19	8.22e-19
C3orf49	C3orf49	10.843	-1.11311	0.0997987	-11.1536	6.88e-29	4.85e-28
C3orf52	C3orf52	948.271	1.58469	0.132031	12.0024	3.45e-33	2.94e-32
C3orf80	C3orf80	259.027	2.02394	0.103332	19.5868	2e-85	9.47e-84
C3orf86P	C3orf86P	2.83755	-1.60092	0.158965	-10.0709	7.43e-24	4.17e-23
C4A	C4A	4026.61	1.41071	0.176578	7.98916	1.36e-15	5.04e-15
C4B	C4B	4424.43	1.39905	0.176639	7.92038	2.37e-15	8.67e-15
C4BPA	C4BPA	85.6355	-2.1744	0.277623	-7.83219	4.79e-15	1.73e-14
C4orf45	C4orf45	1.96087	-1.24658	0.216305	-5.76306	8.26e-09	2.03e-08
C4orf46P1	C4orf46P1	5.66289	1.15561	0.143407	8.05826	7.74e-16	2.91e-15
C4orf48	C4orf48	204.8	2.01352	0.151343	13.3043	2.19e-40	2.45e-39
C4orf50	C4orf50	9.25102	2.29629	0.228752	10.0383	1.03e-23	5.77e-23
C4orf51	C4orf51	5.90539	2.32807	0.304318	7.65015	2.01e-14	6.99e-14
C4orf54	C4orf54	9.84544	2.34902	0.329594	7.127	1.03e-12	3.24e-12
C5AR2	C5AR2	1218.08	1.54529	0.147157	10.5009	8.55e-26	5.25e-25
C5orf46	C5orf46	239.894	1.91753	0.193264	9.92185	3.34e-23	1.82e-22
C5orf47	C5orf47	2.66327	1.06344	0.2114	5.03048	4.89e-07	1.06e-06
C5orf64	C5orf64	11.9007	-1.6373	0.232706	-7.03591	1.98e-12	6.13e-12
C6	C6	212.338	-3.307	0.245654	-13.462	2.62e-41	3.05e-40
C6orf118	C6orf118	5.96494	2.21019	0.36456	6.0626	1.34e-09	3.48e-09
C6orf141	C6orf141	870.984	1.6898	0.193011	8.75496	2.04e-18	8.82e-18
C6orf58	C6orf58	7.32554	-2.14858	0.156248	-13.7511	5.02e-43	6.27e-42
C7	C7	1584.88	-1.97618	0.224268	-8.81166	1.23e-18	5.39e-18
C7orf57	C7orf57	12.5014	1.71926	0.256648	6.69887	2.1e-11	6.13e-11
C8G	C8G	34.6083	1.23226	0.133275	9.246	2.33e-20	1.11e-19
C8orf34	C8orf34	95.3593	-1.30449	0.22249	-5.86312	4.54e-09	1.14e-08
C8orf76	C8orf76	522.453	1.05483	0.0750836	14.0487	7.85e-45	1.05e-43
C8orf88	C8orf88	47.9483	-2.08804	0.118873	-17.5652	4.55e-69	1.33e-67
C9orf163	C9orf163	43.7675	1.67525	0.112412	14.9027	3.16e-50	5.04e-49
CA12	CA12	25927.1	1.77368	0.168104	10.5511	5.02e-26	3.12e-25
CA14	CA14	114.702	1.04791	0.140645	7.45072	9.28e-14	3.12e-13
CA3	CA3	309.279	-3.75199	0.208566	-17.9894	2.36e-72	7.61e-71
CA4	CA4	157.446	-5.36156	0.268576	-19.963	1.16e-88	6.01e-87
CA9	CA9	382.137	4.78219	0.303337	15.7653	5.39e-56	1.03e-54
CAB39L	CAB39L	2284.78	-1.1596	0.092965	-12.4735	1.04e-35	9.83e-35
CABLES2	CABLES2	1120.51	1.25951	0.0802666	15.6916	1.73e-55	3.24e-54
CABP1	CABP1	42.3747	-2.31879	0.10688	-21.6952	2.28e-104	1.77e-102
CABP7	CABP7	32.1116	1.86186	0.173843	10.71	9.14e-27	5.88e-26
CABYR	CABYR	576.312	1.0692	0.108079	9.89282	4.47e-23	2.42e-22
CACFD1	CACFD1	2974.94	1.42399	0.0795451	17.9017	1.14e-71	3.62e-70
CACHD1	CACHD1	1091.08	-2.14343	0.108982	-19.6677	4.08e-86	1.98e-84
CACNA1B	CACNA1B	55.2898	2.35116	0.230008	10.2221	1.58e-24	9.16e-24
CACNA1D	CACNA1D	1437.77	1.35313	0.151136	8.95306	3.46e-19	1.55e-18
CACNA1E	CACNA1E	32.2466	1.57305	0.166801	9.4307	4.07e-21	2.01e-20
CACNA1G	CACNA1G	96.3625	-1.26575	0.17381	-7.28237	3.28e-13	1.07e-12
CACNA1G-AS1	CACNA1G-AS1	6.395	-1.09625	0.160026	-6.85049	7.36e-12	2.21e-11
CACNA1H	CACNA1H	2323.71	2.28662	0.199912	11.4381	2.7e-30	2.03e-29
CACNA1I	CACNA1I	143.858	1.45238	0.17979	8.07818	6.57e-16	2.49e-15
CACNA2D1	CACNA2D1	910.091	-2.04098	0.119327	-17.104	1.38e-65	3.6e-64
CACNA2D2	CACNA2D2	1239.07	1.20214	0.159271	7.54775	4.43e-14	1.51e-13
CACNB3	CACNB3	2623.04	1.43382	0.0816302	17.5648	4.58e-69	1.34e-67
CACNG1	CACNG1	99.5005	3.09623	0.226166	13.6901	1.16e-42	1.44e-41
CACNG4	CACNG4	5389.03	2.45418	0.186135	13.185	1.07e-39	1.17e-38
CACNG6	CACNG6	61.9696	3.53802	0.363561	9.73156	2.21e-22	1.16e-21
CADM2	CADM2	198.29	-1.35578	0.21084	-6.43034	1.27e-10	3.54e-10
CADM3	CADM3	272.294	-2.37448	0.199225	-11.9186	9.47e-33	7.91e-32
CADM3-AS1	CADM3-AS1	57.5889	-2.68812	0.205011	-13.1121	2.81e-39	3.01e-38
CADPS	CADPS	49.7306	2.03896	0.158373	12.8744	6.27e-38	6.35e-37
CALB2	CALB2	1170.32	-2.17185	0.217562	-9.98266	1.82e-23	1e-22
CALCB	CALCB	8.82687	1.54057	0.300587	5.1252	2.97e-07	6.52e-07
CALCOCO1	CALCOCO1	4826.62	-1.10807	0.0599942	-18.4697	3.62e-76	1.33e-74
CALCR	CALCR	35.4235	-1.41119	0.186907	-7.55023	4.35e-14	1.49e-13
CALCRL	CALCRL	2051.68	-1.12643	0.107597	-10.469	1.2e-25	7.31e-25
CALHM1	CALHM1	18.0244	2.80696	0.230551	12.175	4.22e-34	3.74e-33
CALHM3	CALHM3	4.8402	1.64371	0.25226	6.51593	7.22e-11	2.04e-10
CALHM6	CALHM6	399.307	1.1419	0.136827	8.34559	7.09e-17	2.82e-16
CALML5	CALML5	4793.22	2.91754	0.300008	9.72489	2.36e-22	1.23e-21
CALR	CALR	56361.4	1.04616	0.068646	15.2399	1.92e-52	3.3e-51
CALR3	CALR3	2.0118	1.17427	0.243475	4.82295	1.41e-06	2.94e-06
CALY	CALY	15.0101	2.08386	0.25826	8.06885	7.1e-16	2.68e-15
CAMK1	CAMK1	248.81	-1.54887	0.0761474	-20.3404	5.65e-92	3.22e-90
CAMK2A	CAMK2A	35.0945	1.18958	0.139888	8.50381	1.83e-17	7.54e-17
CAMK2N2	CAMK2N2	57.2369	3.12118	0.174865	17.849	2.94e-71	9.19e-70
CAMKV	CAMKV	13.947	1.36782	0.309061	4.42573	9.61e-06	1.86e-05
CAMP	CAMP	79.5801	4.07241	0.222661	18.2897	1e-74	3.51e-73
CAMSAP3	CAMSAP3	2478.72	1.09833	0.0953038	11.5245	9.93e-31	7.61e-30
CANT1	CANT1	9830.73	1.30567	0.0816655	15.9881	1.55e-57	3.11e-56
CAPG	CAPG	11309.9	1.12412	0.0878737	12.7924	1.81e-37	1.8e-36
CAPN11	CAPN11	116.588	-2.36665	0.143458	-16.4972	3.84e-61	8.58e-60
CAPN13	CAPN13	2186.26	1.80817	0.166339	10.8703	1.6e-27	1.06e-26
CAPN3	CAPN3	45.4253	-1.28665	0.117515	-10.9488	6.73e-28	4.54e-27
CAPN8	CAPN8	2274.51	1.04858	0.208792	5.02212	5.11e-07	1.1e-06
CAPN9	CAPN9	500.3	2.68481	0.184844	14.5248	8.44e-48	1.24e-46
CAPS	CAPS	2833.34	2.19038	0.141893	15.4368	9.25e-54	1.66e-52
CAPSL	CAPSL	70.8232	3.98562	0.251821	15.8272	2.02e-56	3.92e-55
CAPZA3	CAPZA3	5.61423	-2.78972	0.291519	-9.56962	1.07e-21	5.45e-21
CARD17P	CARD17P	8.78008	2.89721	0.266127	10.8866	1.34e-27	8.9e-27
CARD19	CARD19	1719.93	1.07648	0.0801776	13.4262	4.24e-41	4.92e-40
CARD6	CARD6	589.713	-1.29677	0.0925723	-14.0082	1.39e-44	1.84e-43
CARHSP1-DT	CARHSP1-DT	2.08786	1.37836	0.229335	6.01027	1.85e-09	4.77e-09
CARMIL2	CARMIL2	301.802	1.6872	0.163857	10.2968	7.28e-25	4.29e-24
CARMIL3	CARMIL3	130.08	1.05169	0.141449	7.43511	1.04e-13	3.5e-13
CARMN	CARMN	268.498	-3.73578	0.151556	-24.6494	3.73e-134	5.85e-132
CASC16	CASC16	30.9188	3.48587	0.29693	11.7397	7.97e-32	6.39e-31
CASKIN1	CASKIN1	152.533	1.56928	0.142727	10.995	4.04e-28	2.76e-27
CASP12	CASP12	11.4169	-2.14691	0.133842	-16.0406	6.65e-58	1.35e-56
CASP14	CASP14	1057.59	6.39437	0.369903	17.2866	5.93e-67	1.62e-65
CASP16P	CASP16P	87.7941	1.68125	0.177874	9.45189	3.33e-21	1.65e-20
CASP4LP	CASP4LP	143.104	-1.6514	0.103983	-15.8815	8.52e-57	1.67e-55
CASQ2	CASQ2	201.854	-3.53073	0.168786	-20.9184	3.64e-97	2.39e-95
CAT	CAT	6366.74	-2.09346	0.0730091	-28.6739	8.06e-181	4.65e-178
CATIP	CATIP	37.304	1.66466	0.174554	9.5366	1.48e-21	7.45e-21
CATIP-AS2	CATIP-AS2	2.1343	1.6313	0.277678	5.87479	4.23e-09	1.06e-08
CATSPER1	CATSPER1	31.78	1.56706	0.120947	12.9566	2.16e-38	2.23e-37
CAV1	CAV1	8407.45	-3.40715	0.11013	-30.9376	3.73e-210	5.43e-207
CAV2	CAV2	2646.45	-2.91538	0.105996	-27.5047	1.54e-166	5.83e-164
CAV3	CAV3	3.0619	-2.53075	0.168751	-14.9969	7.69e-51	1.25e-49
CAVIN1	CAVIN1	19350.8	-1.93021	0.0921948	-20.9363	2.5e-97	1.65e-95
CAVIN2	CAVIN2	1286	-4.00885	0.160821	-24.9274	3.75e-137	6.34e-135
CAVIN2-AS1	CAVIN2-AS1	4.19073	-3.83476	0.241262	-15.8946	6.9e-57	1.36e-55
CAVIN4	CAVIN4	31.9771	1.05064	0.122425	8.5819	9.33e-18	3.89e-17
CBARP	CBARP	70.304	1.31383	0.117022	11.2273	3e-29	2.15e-28
CBARP-DT	CBARP-DT	5.62259	1.453	0.174512	8.3261	8.35e-17	3.32e-16
CBLC	CBLC	1170.56	1.46426	0.126518	11.5735	5.61e-31	4.36e-30
CBLN1	CBLN1	67.7157	-1.20354	0.216605	-5.55638	2.75e-08	6.53e-08
CBLN2	CBLN2	691.283	5.89472	0.327913	17.9764	2.98e-72	9.59e-71
CBLN4	CBLN4	69.372	-1.25991	0.162534	-7.75164	9.07e-15	3.22e-14
CBS	CBS	49.1127	1.92297	0.209498	9.17891	4.35e-20	2.04e-19
CBX1P3	CBX1P3	4.31984	1.21193	0.248174	4.88339	1.04e-06	2.19e-06
CBX2	CBX2	1488.1	2.63976	0.166366	15.8671	1.07e-56	2.1e-55
CBX3	CBX3	14551.9	1.02835	0.0519171	19.8076	2.56e-87	1.28e-85
CBX4	CBX4	3298.61	1.70676	0.0893241	19.1076	2.18e-81	9.26e-80
CBX7	CBX7	1938.64	-1.55649	0.0881129	-17.6648	7.83e-70	2.36e-68
CBX8	CBX8	729.118	1.45821	0.0864447	16.8687	7.64e-64	1.89e-62
CBY2	CBY2	11.3999	2.4247	0.344478	7.03876	1.94e-12	6.01e-12
CCBE1	CCBE1	120.611	-1.97875	0.152244	-12.9972	1.27e-38	1.32e-37
CCDC136	CCDC136	151.371	-1.38306	0.11102	-12.4577	1.27e-35	1.19e-34
CCDC137	CCDC137	1604.9	1.07515	0.0794636	13.5301	1.04e-41	1.23e-40
CCDC141	CCDC141	43.7445	-2.86079	0.145548	-19.6553	5.21e-86	2.51e-84
CCDC144A	CCDC144A	50.6608	-1.4937	0.224254	-6.66074	2.72e-11	7.9e-11
CCDC150	CCDC150	121.717	1.36331	0.110868	12.2967	9.44e-35	8.54e-34
CCDC152	CCDC152	130.607	-1.4566	0.100939	-14.4306	3.32e-47	4.77e-46
CCDC154	CCDC154	112.295	1.67675	0.150872	11.1137	1.08e-28	7.52e-28
CCDC158	CCDC158	129.195	-1.63569	0.149077	-10.9721	5.21e-28	3.53e-27
CCDC167	CCDC167	1000.58	1.92531	0.0874705	22.011	2.26e-107	1.89e-105
CCDC175	CCDC175	5.75727	2.17008	0.340181	6.37919	1.78e-10	4.9e-10
CCDC177	CCDC177	28.3986	1.04902	0.21071	4.97847	6.41e-07	1.37e-06
CCDC178	CCDC178	51.6647	-2.97835	0.164249	-18.1332	1.74e-73	5.8e-72
CCDC185	CCDC185	10.7364	2.82525	0.258266	10.9393	7.48e-28	5.04e-27
CCDC187	CCDC187	22.8465	4.70538	0.336721	13.9741	2.24e-44	2.94e-43
CCDC194	CCDC194	11.5983	1.21361	0.188944	6.42313	1.34e-10	3.71e-10
CCDC196	CCDC196	38.174	2.81451	0.315328	8.92567	4.43e-19	1.97e-18
CCDC24	CCDC24	1113.32	1.25255	0.0969457	12.9201	3.47e-38	3.55e-37
CCDC28B	CCDC28B	418.666	1.06995	0.101941	10.4958	9.03e-26	5.55e-25
CCDC3	CCDC3	1746.8	-2.81848	0.122071	-23.0888	6e-118	6.76e-116
CCDC38	CCDC38	7.72265	-1.17911	0.147358	-8.00166	1.23e-15	4.57e-15
CCDC50	CCDC50	4193.21	-1.2848	0.0543404	-23.6435	1.38e-123	1.77e-121
CCDC54-AS1	CCDC54-AS1	8.01855	-1.21077	0.120542	-10.0444	9.72e-24	5.43e-23
CCDC60	CCDC60	16.3865	3.34262	0.352038	9.49507	2.2e-21	1.1e-20
CCDC69	CCDC69	2133.46	-3.06947	0.118213	-25.9656	1.21e-148	2.89e-146
CCDC74A	CCDC74A	2376.63	1.77521	0.182203	9.74304	1.98e-22	1.04e-21
CCDC74B	CCDC74B	449.519	1.51357	0.173898	8.70376	3.21e-18	1.37e-17
CCDC78	CCDC78	447.198	3.55504	0.161697	21.9858	3.94e-107	3.26e-105
CCDC8	CCDC8	1128.89	-1.76793	0.138072	-12.8044	1.55e-37	1.55e-36
CCDC80	CCDC80	15966.1	-1.89275	0.131475	-14.3962	5.46e-47	7.78e-46
CCDC82	CCDC82	763.899	-1.23345	0.0947574	-13.0169	9.81e-39	1.03e-37
CCDC83	CCDC83	10.5726	1.93462	0.236768	8.17098	3.06e-16	1.18e-15
CCDC85A	CCDC85A	75.6579	-2.1326	0.161753	-13.1843	1.08e-39	1.18e-38
CCDC87	CCDC87	118.794	1.69151	0.120302	14.0605	6.64e-45	8.89e-44
CCDC96	CCDC96	333.532	1.02272	0.105839	9.66302	4.33e-22	2.24e-21
CCK	CCK	5.63257	1.82067	0.360815	5.046	4.51e-07	9.76e-07
CCKAR	CCKAR	4.74924	1.61463	0.271458	5.94798	2.71e-09	6.91e-09
CCKBR	CCKBR	36.1021	3.20288	0.376715	8.50214	1.86e-17	7.64e-17
CCL11	CCL11	76.656	4.10188	0.166933	24.572	2.51e-133	3.88e-131
CCL13	CCL13	119.872	-1.93616	0.210675	-9.19027	3.92e-20	1.84e-19
CCL14	CCL14	184.503	-3.27826	0.182239	-17.9888	2.39e-72	7.69e-71
CCL15	CCL15	2.78025	1.11676	0.323455	3.4526	0.000555213	0.000915934
CCL16	CCL16	7.29702	-2.36686	0.169446	-13.9682	2.44e-44	3.19e-43
CCL17	CCL17	59.7573	1.79448	0.185403	9.67877	3.71e-22	1.93e-21
CCL19	CCL19	1216.04	1.15205	0.22098	5.21336	1.85e-07	4.13e-07
CCL2	CCL2	1681.41	-1.03166	0.134236	-7.68545	1.52e-14	5.34e-14
CCL20	CCL20	72.5806	2.34445	0.207583	11.294	1.4e-29	1.02e-28
CCL21	CCL21	965.91	-2.27089	0.221611	-10.2472	1.22e-24	7.1e-24
CCL23	CCL23	16.2502	-1.99247	0.15981	-12.4678	1.12e-35	1.05e-34
CCL24	CCL24	13.8319	-2.26112	0.27679	-8.16908	3.11e-16	1.19e-15
CCL25	CCL25	6.9699	1.91749	0.220606	8.69191	3.56e-18	1.52e-17
CCL28	CCL28	2344.62	-2.35482	0.19041	-12.3671	3.94e-35	3.63e-34
CCL5	CCL5	2581.56	1.054	0.153966	6.84568	7.61e-12	2.28e-11
CCL7	CCL7	34.2672	3.83365	0.30122	12.7271	4.18e-37	4.1e-36
CCM2L	CCM2L	239.746	-1.69687	0.0914829	-18.5485	8.39e-77	3.14e-75
CCN1	CCN1	13355.6	-1.51788	0.126595	-11.99	4.01e-33	3.4e-32
CCN3	CCN3	600.015	-1.46215	0.137797	-10.6109	2.65e-26	1.67e-25
CCN4	CCN4	1128.49	3.44812	0.127525	27.0389	5.16e-161	1.64e-158
CCN5	CCN5	2100.76	-1.65338	0.172096	-9.60733	7.45e-22	3.81e-21
CCNA2	CCNA2	1421.71	2.86585	0.119169	24.0486	8.62e-128	1.19e-125
CCNB1	CCNB1	3007.58	2.58774	0.0952996	27.1538	2.29e-162	7.59e-160
CCNB2	CCNB2	1440.96	3.03921	0.119535	25.4253	1.33e-142	2.68e-140
CCND1	CCND1	33890.7	1.29117	0.140826	9.16854	4.79e-20	2.24e-19
CCND2	CCND2	2531.24	-1.02566	0.10374	-9.88682	4.75e-23	2.57e-22
CCND2-AS1	CCND2-AS1	2.06518	-1.9786	0.159747	-12.3858	3.12e-35	2.88e-34
CCNE1	CCNE1	500.499	2.73429	0.16601	16.4706	5.97e-61	1.32e-59
CCNE2	CCNE2	504.657	2.4422	0.121877	20.0383	2.55e-89	1.36e-87
CCNF	CCNF	1830.38	1.70039	0.0778787	21.8338	1.11e-105	8.81e-104
CCNI2	CCNI2	105.641	1.80274	0.174181	10.3498	4.19e-25	2.5e-24
CCNO	CCNO	762.756	2.47157	0.208965	11.8277	2.81e-32	2.3e-31
CCNP	CCNP	472.678	2.97931	0.178636	16.6781	1.89e-62	4.46e-61
CCR3	CCR3	15.7414	1.10395	0.161181	6.84917	7.43e-12	2.23e-11
CCR4	CCR4	224.912	1.72691	0.155689	11.0921	1.37e-28	9.53e-28
CCR7	CCR7	434.294	1.7311	0.169593	10.2074	1.84e-24	1.06e-23
CCR8	CCR8	44.305	3.16189	0.191882	16.4783	5.25e-61	1.16e-59
CCT3	CCT3	26056.2	1.19061	0.0594451	20.0287	3.1e-89	1.64e-87
CD164L2	CD164L2	90.1757	-1.03507	0.178695	-5.79237	6.94e-09	1.72e-08
CD177	CD177	232.011	3.85228	0.271348	14.1968	9.59e-46	1.32e-44
CD19	CD19	120.739	2.31194	0.227146	10.1782	2.48e-24	1.43e-23
CD1A	CD1A	99.359	3.14271	0.247547	12.6954	6.27e-37	6.13e-36
CD1B	CD1B	29.8889	1.29291	0.233587	5.53504	3.11e-08	7.35e-08
CD2	CD2	981.109	1.05736	0.154466	6.84526	7.63e-12	2.29e-11
CD200	CD200	845.023	-1.22886	0.0861689	-14.2611	3.82e-46	5.31e-45
CD207	CD207	196.955	1.33221	0.200182	6.65499	2.83e-11	8.21e-11
CD209	CD209	337.791	-2.67306	0.155452	-17.1954	2.88e-66	7.63e-65
CD22	CD22	613.704	1.18562	0.149823	7.91347	2.5e-15	9.15e-15
CD24	CD24	65980.8	1.66305	0.159382	10.4343	1.73e-25	1.05e-24
CD248	CD248	3517.7	-1.76129	0.106974	-16.4645	6.6e-61	1.46e-59
CD24P4	CD24P4	20.7656	1.31097	0.185694	7.05983	1.67e-12	5.19e-12
CD27	CD27	335.026	1.05133	0.159916	6.57425	4.89e-11	1.4e-10
CD2BP2-DT	CD2BP2-DT	298.648	1.68504	0.112079	15.0344	4.37e-51	7.15e-50
CD300LF	CD300LF	168.29	1.06288	0.105312	10.0927	5.95e-24	3.36e-23
CD300LG	CD300LG	605.382	-5.06505	0.231486	-21.8806	3.98e-106	3.22e-104
CD302	CD302	603.254	-1.70856	0.0988662	-17.2815	6.48e-67	1.77e-65
CD34	CD34	5176.81	-2.13478	0.0847829	-25.1793	6.75e-140	1.24e-137
CD36	CD36	12939.9	-4.24555	0.192688	-22.0332	1.38e-107	1.17e-105
CD3D	CD3D	390.874	1.07586	0.163016	6.59971	4.12e-11	1.18e-10
CD44-DT	CD44-DT	26.7562	1.25126	0.167185	7.48428	7.19e-14	2.43e-13
CD5	CD5	469.494	1.23388	0.153536	8.03644	9.25e-16	3.46e-15
CD6	CD6	624.757	1.14909	0.142041	8.08988	5.97e-16	2.27e-15
CD7	CD7	334.233	1.10361	0.158382	6.96804	3.21e-12	9.84e-12
CD79A	CD79A	787.095	1.05851	0.215382	4.91458	8.9e-07	1.88e-06
CD80	CD80	76.2815	2.23561	0.131683	16.9772	1.21e-64	3.06e-63
CD93	CD93	6202.27	-1.04317	0.0887831	-11.7496	7.09e-32	5.7e-31
CD99L2	CD99L2	3250.06	-1.07868	0.0741634	-14.5447	6.31e-48	9.28e-47
CDC14B	CDC14B	864.199	-1.84606	0.0867541	-21.2792	1.77e-100	1.26e-98
CDC20	CDC20	2350.15	3.48679	0.137669	25.3273	1.6e-141	3.07e-139
CDC20B	CDC20B	293.366	6.55482	0.351404	18.6532	1.19e-77	4.58e-76
CDC20P1	CDC20P1	43.609	-1.54873	0.125297	-12.3605	4.28e-35	3.93e-34
CDC25A	CDC25A	497.047	2.17059	0.123472	17.5796	3.53e-69	1.04e-67
CDC25B	CDC25B	3792.08	1.15865	0.105772	10.9543	6.34e-28	4.28e-27
CDC25C	CDC25C	348.456	3.3534	0.114011	29.4128	3.77e-190	2.95e-187
CDC42EP2	CDC42EP2	855.355	-1.19725	0.0794046	-15.0779	2.26e-51	3.73e-50
CDC45	CDC45	637.716	2.863	0.124755	22.9489	1.51e-116	1.65e-114
CDC6	CDC6	1776	2.98952	0.144955	20.6237	1.68e-94	1.03e-92
CDC7	CDC7	749.501	1.77303	0.105605	16.7892	2.93e-63	7.08e-62
CDCA2	CDCA2	567.992	2.92771	0.138915	21.0754	1.34e-98	9.07e-97
CDCA3	CDCA3	916.859	3.05446	0.121424	25.1553	1.24e-139	2.22e-137
CDCA4	CDCA4	1219.61	1.27498	0.0750152	16.9963	8.75e-65	2.22e-63
CDCA5	CDCA5	1678.44	3.06869	0.119638	25.6498	4.25e-145	9.2e-143
CDCA7	CDCA7	635.988	1.44386	0.181916	7.93696	2.07e-15	7.61e-15
CDCA8	CDCA8	1354.51	3.01036	0.116853	25.762	2.37e-146	5.2e-144
CDCP1	CDCP1	3418.31	1.01707	0.104534	9.7296	2.25e-22	1.18e-21
CDCP2	CDCP2	1.76823	-1.38702	0.161779	-8.57355	1e-17	4.18e-17
CDH11	CDH11	7938.84	1.50484	0.113759	13.2284	6.02e-40	6.64e-39
CDH12	CDH12	31.3588	-2.28302	0.317064	-7.2005	6e-13	1.92e-12
CDH13	CDH13	1306.6	-1.44722	0.0876924	-16.5033	3.47e-61	7.77e-60
CDH13-AS2	CDH13-AS2	161.282	1.50596	0.158703	9.48913	2.33e-21	1.16e-20
CDH15	CDH15	23.9292	1.80263	0.178407	10.104	5.3e-24	3e-23
CDH18	CDH18	18.4637	2.13198	0.361489	5.89777	3.68e-09	9.29e-09
CDH2	CDH2	559.767	2.4421	0.184309	13.25	4.51e-40	5.01e-39
CDH20	CDH20	24.9536	-3.48186	0.167421	-20.797	4.61e-96	2.92e-94
CDH22	CDH22	26.4359	-1.1053	0.225409	-4.90355	9.41e-07	1.98e-06
CDH23	CDH23	487.662	-2.07001	0.121374	-17.0548	3.22e-65	8.28e-64
CDH5	CDH5	3183.14	-1.66804	0.0887262	-18.7999	7.57e-79	3.01e-77
CDH7	CDH7	103.974	3.54575	0.302002	11.7408	7.87e-32	6.31e-31
CDH8	CDH8	48.1051	-1.41892	0.153073	-9.26953	1.87e-20	8.92e-20
CDHR17P	CDHR17P	4.7264	1.32502	0.279747	4.73649	2.17e-06	4.45e-06
CDHR18P	CDHR18P	9.06033	-1.31897	0.104747	-12.5919	2.34e-36	2.25e-35
CDHR2	CDHR2	35.2901	1.56515	0.137306	11.399	4.23e-30	3.15e-29
CDHR4	CDHR4	34.3686	1.90179	0.271672	7.00032	2.55e-12	7.86e-12
CDIPTOSP	CDIPTOSP	31.1794	2.61179	0.195122	13.3854	7.36e-41	8.44e-40
CDK1	CDK1	2657.06	3.16937	0.111045	28.5412	3.61e-179	1.97e-176
CDK5	CDK5	1180.29	1.3885	0.0697389	19.91	3.33e-88	1.71e-86
CDK5R1	CDK5R1	372.145	1.32201	0.105542	12.5259	5.39e-36	5.12e-35
CDK5R2	CDK5R2	14.6678	4.25556	0.379002	11.2283	2.96e-29	2.13e-28
CDKL2	CDKL2	45.0854	-1.05361	0.209046	-5.04008	4.65e-07	1.01e-06
CDKN1C	CDKN1C	1039.17	-2.12062	0.112364	-18.8727	1.91e-79	7.72e-78
CDKN2A	CDKN2A	1232.06	2.75864	0.179908	15.3336	4.56e-53	8.02e-52
CDKN2A-DT	CDKN2A-DT	3.85452	1.86686	0.277759	6.72113	1.8e-11	5.29e-11
CDKN2B-AS1	CDKN2B-AS1	54.4392	2.03169	0.130083	15.6185	5.45e-55	1.01e-53
CDKN2C	CDKN2C	1294.19	-1.39936	0.0997682	-14.0261	1.08e-44	1.43e-43
CDKN2D	CDKN2D	646.285	1.15597	0.0881998	13.1063	3.03e-39	3.24e-38
CDKN3	CDKN3	592.252	2.93359	0.108223	27.1068	8.2e-162	2.69e-159
CDNF	CDNF	119.656	-1.2309	0.0886447	-13.8858	7.73e-44	9.92e-43
CDO1	CDO1	516.446	-3.71117	0.164214	-22.5996	4.37e-113	4.34e-111
CDSN	CDSN	30.8262	2.58931	0.269965	9.59125	8.7e-22	4.44e-21
CDT1	CDT1	1023.83	2.42479	0.123977	19.5584	3.5e-85	1.64e-83
CEACAM16	CEACAM16	4.85031	1.37229	0.303847	4.5164	6.29e-06	1.24e-05
CEACAM20	CEACAM20	2.29014	-1.02283	0.230242	-4.44244	8.89e-06	1.73e-05
CEACAM5	CEACAM5	2729.03	5.3792	0.295399	18.21	4.3e-74	1.48e-72
CEACAM6	CEACAM6	11648.5	4.7315	0.268585	17.6164	1.84e-69	5.46e-68
CEACAM7	CEACAM7	51.5584	1.69342	0.236967	7.14623	8.92e-13	2.83e-12
CEACAMP5	CEACAMP5	4.14739	-1.05881	0.221437	-4.78153	1.74e-06	3.59e-06
CEBPA	CEBPA	1320.97	-2.32611	0.108875	-21.3649	2.83e-101	2.04e-99
CEBPA-DT	CEBPA-DT	193.469	-1.09083	0.118936	-9.17156	4.66e-20	2.18e-19
CEBPB-AS1	CEBPB-AS1	70.2635	-1.10066	0.0936924	-11.7476	7.27e-32	5.83e-31
CEBPE	CEBPE	6.36888	1.04658	0.141119	7.41632	1.2e-13	4.02e-13
CECR7	CECR7	340.517	-1.11617	0.158542	-7.04024	1.92e-12	5.95e-12
CEDORA	CEDORA	4.96211	2.06611	0.290609	7.10959	1.16e-12	3.66e-12
CEL	CEL	108.91	1.6714	0.192601	8.67805	4.03e-18	1.71e-17
CELA1	CELA1	2.25195	1.57517	0.267648	5.88524	3.97e-09	1e-08
CELF2	CELF2	2302.18	-1.9801	0.109154	-18.1405	1.53e-73	5.11e-72
CELF2-AS1	CELF2-AS1	10.9016	-1.40607	0.191451	-7.3443	2.07e-13	6.81e-13
CELF3	CELF3	31.001	3.74202	0.280834	13.3247	1.66e-40	1.88e-39
CELF4	CELF4	80.0335	1.22865	0.194376	6.32097	2.6e-10	7.09e-10
CELSR1	CELSR1	13555.6	1.53265	0.124654	12.2953	9.6e-35	8.69e-34
CELSR3	CELSR3	912.309	2.44496	0.147869	16.5347	2.07e-61	4.67e-60
CEMIP	CEMIP	1254.49	3.16491	0.158311	19.9917	6.51e-89	3.4e-87
CEND1	CEND1	13.9738	1.58552	0.153147	10.3529	4.06e-25	2.42e-24
CENPA	CENPA	443.046	3.27997	0.136625	24.0071	2.34e-127	3.22e-125
CENPE	CENPE	1167.71	2.6153	0.114243	22.8923	5.54e-116	5.98e-114
CENPF	CENPF	6596.07	3.23972	0.118194	27.4103	2.07e-165	7.51e-163
CENPH	CENPH	610.237	1.11201	0.0733223	15.166	5.94e-52	1e-50
CENPI	CENPI	359.686	2.17352	0.108316	20.0665	1.45e-89	7.76e-88
CENPK	CENPK	324.193	1.94783	0.0961499	20.2582	3.01e-91	1.69e-89
CENPL	CENPL	659.236	1.36439	0.0750956	18.1688	9.12e-74	3.1e-72
CENPM	CENPM	523.426	2.78789	0.114357	24.3788	2.87e-131	4.26e-129
CENPN	CENPN	621.276	1.37877	0.10033	13.7424	5.66e-43	7.06e-42
CENPO	CENPO	808.463	1.24026	0.0745997	16.6256	4.55e-62	1.05e-60
CENPP	CENPP	660.943	1.29031	0.093918	13.7387	5.96e-43	7.43e-42
CENPS	CENPS	226.158	1.11933	0.0705867	15.8575	1.25e-56	2.43e-55
CENPU	CENPU	1454.68	2.37925	0.10121	23.508	3.38e-122	4.16e-120
CENPW	CENPW	677.754	1.7347	0.140826	12.318	7.25e-35	6.6e-34
CENPX	CENPX	2536.86	1.44139	0.0930321	15.4935	3.84e-54	6.95e-53
CEP112	CEP112	441.904	-1.78083	0.083871	-21.233	4.74e-100	3.33e-98
CEP164P1	CEP164P1	5.11539	-1.09908	0.133222	-8.25004	1.58e-16	6.19e-16
CEP55	CEP55	1378.86	3.42912	0.123566	27.7514	1.67e-169	7.31e-167
CEP68	CEP68	2324.53	-1.22422	0.0491994	-24.8829	1.14e-136	1.88e-134
CEP85	CEP85	1421.47	1.04795	0.070467	14.8716	5.04e-50	8e-49
CERS1	CERS1	46.4693	1.15376	0.196975	5.85742	4.7e-09	1.18e-08
CERS2	CERS2	19493.9	1.32438	0.0739312	17.9137	9.22e-72	2.92e-70
CERS3-AS1	CERS3-AS1	4.00513	-2.7307	0.250183	-10.9148	9.79e-28	6.56e-27
CERS6	CERS6	5817.07	1.08466	0.102543	10.5777	3.78e-26	2.37e-25
CERS6-AS1	CERS6-AS1	6.85194	1.63057	0.162138	10.0567	8.58e-24	4.81e-23
CES1	CES1	1515.5	-3.8764	0.190633	-20.3343	6.39e-92	3.64e-90
CES1P1	CES1P1	15.6563	-2.35236	0.317831	-7.4013	1.35e-13	4.48e-13
CES5AP1	CES5AP1	3.77017	-1.26291	0.225166	-5.60878	2.04e-08	4.88e-08
CETN4P	CETN4P	6.54689	-2.04136	0.131715	-15.4984	3.56e-54	6.44e-53
CETP	CETP	125.062	-2.34564	0.120901	-19.4012	7.53e-84	3.38e-82
CFAP107	CFAP107	7.78528	2.09165	0.347543	6.01838	1.76e-09	4.54e-09
CFAP119	CFAP119	102.012	1.73743	0.120908	14.3698	8.01e-47	1.14e-45
CFAP141	CFAP141	13.775	1.87564	0.182082	10.3011	6.97e-25	4.1e-24
CFAP144	CFAP144	79.5555	1.5446	0.169589	9.10785	8.4e-20	3.88e-19
CFAP157	CFAP157	260.416	1.43036	0.096306	14.8522	6.73e-50	1.06e-48
CFAP20DC	CFAP20DC	275.941	2.06898	0.122243	16.9252	2.93e-64	7.32e-63
CFAP221	CFAP221	73.6821	1.2729	0.189747	6.70841	1.97e-11	5.76e-11
CFAP276	CFAP276	34.6001	1.92487	0.173624	11.0864	1.46e-28	1.01e-27
CFAP45	CFAP45	354.355	2.68402	0.140188	19.1459	1.05e-81	4.45e-80
CFAP47	CFAP47	56.4262	2.98195	0.218111	13.6717	1.5e-42	1.84e-41
CFAP57	CFAP57	161.029	1.0808	0.149235	7.24226	4.41e-13	1.42e-12
CFAP58-DT	CFAP58-DT	34.876	1.56332	0.180943	8.63987	5.63e-18	2.38e-17
CFAP61	CFAP61	114.871	1.49274	0.157689	9.46633	2.9e-21	1.44e-20
CFAP65	CFAP65	56.7103	2.15715	0.229352	9.40541	5.18e-21	2.54e-20
CFAP77	CFAP77	17.8554	1.49888	0.22913	6.54162	6.09e-11	1.73e-10
CFAP90	CFAP90	213.181	1.70925	0.155652	10.9812	4.7e-28	3.2e-27
CFAP92	CFAP92	162.039	1.94581	0.13718	14.1844	1.14e-45	1.57e-44
CFAP99	CFAP99	43.3953	2.00919	0.166538	12.0645	1.63e-33	1.41e-32
CFB	CFB	3440.13	2.54426	0.166213	15.3072	6.84e-53	1.19e-51
CFD	CFD	3274.51	-3.15229	0.187746	-16.7902	2.88e-63	6.99e-62
CFH	CFH	3450.17	-1.4589	0.108687	-13.4229	4.44e-41	5.14e-40
CFHR1	CFHR1	2.74104	-1.4188	0.283563	-5.00347	5.63e-07	1.21e-06
CFI	CFI	1141.77	-1.22882	0.114362	-10.745	6.26e-27	4.05e-26
CFL1	CFL1	50638.8	1.01867	0.0569944	17.8731	1.91e-71	6e-70
CFL2	CFL2	1308.02	-2.29917	0.0787865	-29.1823	3.25e-187	2.26e-184
CFLAR	CFLAR	6027.68	-1.02945	0.0589134	-17.4739	2.26e-68	6.45e-67
CFLAR-AS1	CFLAR-AS1	21.9457	-1.2835	0.108226	-11.8595	1.92e-32	1.58e-31
CFP	CFP	118.013	-1.43116	0.139184	-10.2825	8.45e-25	4.96e-24
CGA	CGA	581.257	8.29877	0.41874	19.8185	2.06e-87	1.03e-85
CGB7	CGB7	7.60032	-1.43327	0.161641	-8.867	7.51e-19	3.32e-18
CH25H	CH25H	173.617	-1.14028	0.140417	-8.12068	4.64e-16	1.77e-15
CHAC1	CHAC1	185.06	1.42192	0.148211	9.59394	8.48e-22	4.33e-21
CHAD	CHAD	2337.52	1.51695	0.233171	6.50573	7.73e-11	2.18e-10
CHAF1A	CHAF1A	1535.46	1.01729	0.0754848	13.4767	2.14e-41	2.51e-40
CHAF1B	CHAF1B	1302.6	1.42235	0.0870633	16.337	5.38e-60	1.15e-58
CHCHD2P9	CHCHD2P9	145.17	1.12252	0.122843	9.13781	6.37e-20	2.96e-19
CHCHD3P1	CHCHD3P1	4.40073	2.35471	0.33628	7.00224	2.52e-12	7.75e-12
CHCT1	CHCT1	3.6284	-1.14171	0.167746	-6.8062	1e-11	2.98e-11
CHD5	CHD5	36.2381	1.06696	0.19908	5.35944	8.35e-08	1.91e-07
CHD9NB	CHD9NB	170.431	-2.66165	0.189105	-14.075	5.41e-45	7.26e-44
CHEK1	CHEK1	1045.77	1.54681	0.098009	15.7823	4.12e-56	7.89e-55
CHGA	CHGA	357.697	3.97159	0.379994	10.4517	1.44e-25	8.74e-25
CHGB	CHGB	814.01	3.54057	0.373805	9.4717	2.75e-21	1.37e-20
CHILL1	CHILL1	10.0106	1.74681	0.199648	8.74943	2.14e-18	9.25e-18
CHL1	CHL1	795.859	-3.02266	0.173086	-17.4633	2.73e-68	7.75e-67
CHL1-AS2	CHL1-AS2	6.01217	-2.99537	0.214235	-13.9817	2.02e-44	2.65e-43
CHMP4BP1	CHMP4BP1	15.9951	1.35803	0.1618	8.39325	4.73e-17	1.9e-16
CHPF	CHPF	8341.98	1.4233	0.0840672	16.9304	2.68e-64	6.71e-63
CHRD	CHRD	1643.33	1.38044	0.166251	8.30336	1.01e-16	4e-16
CHRDL1	CHRDL1	2724.2	-4.5103	0.197872	-22.7941	5.25e-115	5.49e-113
CHRNA1	CHRNA1	89.2121	1.43973	0.163459	8.80786	1.28e-18	5.57e-18
CHRNA2	CHRNA2	19.8162	-1.69193	0.352291	-4.80264	1.57e-06	3.24e-06
CHRNA4	CHRNA4	11.1925	2.16328	0.372689	5.80452	6.46e-09	1.6e-08
CHRNA5	CHRNA5	136.542	1.27877	0.165011	7.74961	9.22e-15	3.27e-14
CHRNA6	CHRNA6	48.3034	3.89624	0.182191	21.3855	1.82e-101	1.33e-99
CHRNA9	CHRNA9	73.4874	5.25757	0.32359	16.2477	2.32e-59	4.87e-58
CHRNB4	CHRNB4	21.2364	1.6847	0.231327	7.28274	3.27e-13	1.06e-12
CHST1	CHST1	1297	1.92061	0.175678	10.9326	8.05e-28	5.42e-27
CHST11	CHST11	1872.5	1.19343	0.0905841	13.1749	1.22e-39	1.34e-38
CHST3	CHST3	1858.89	-1.30092	0.122866	-10.5881	3.38e-26	2.12e-25
CHST6	CHST6	208.233	2.26138	0.167194	13.5255	1.11e-41	1.31e-40
CHST7	CHST7	191.021	-1.19564	0.0765861	-15.6117	6.06e-55	1.12e-53
CHST8	CHST8	688.815	1.93105	0.236288	8.17242	3.02e-16	1.16e-15
CHST9	CHST9	242.783	-2.28985	0.225732	-10.1441	3.52e-24	2.01e-23
CHTF18	CHTF18	1285.37	1.78963	0.104343	17.1515	6.13e-66	1.61e-64
CIAO2AP2	CIAO2AP2	8.00351	-1.33419	0.15181	-8.78853	1.52e-18	6.6e-18
CIB1	CIB1	7193.57	1.10373	0.0804734	13.7155	8.2e-43	1.02e-41
CIB3	CIB3	35.0676	3.1324	0.198519	15.7789	4.35e-56	8.31e-55
CIB4	CIB4	4.04089	1.13091	0.301241	3.75417	0.000173916	0.000301338
CIBAR1-DT	CIBAR1-DT	6.23249	-1.02916	0.173163	-5.94332	2.79e-09	7.1e-09
CIBAR2	CIBAR2	20.4716	1.79704	0.227123	7.91221	2.53e-15	9.24e-15
CIDEA	CIDEA	609.157	-5.11683	0.274554	-18.6369	1.61e-77	6.2e-76
CIDEC	CIDEC	2151.46	-5.37001	0.265025	-20.2623	2.77e-91	1.56e-89
CILP2	CILP2	975.033	3.43348	0.142332	24.123	1.43e-128	2.03e-126
CIP2A	CIP2A	675.83	1.88932	0.106459	17.7468	1.82e-70	5.57e-69
CISD3	CISD3	2553.34	1.16809	0.107745	10.8413	2.19e-27	1.45e-26
CISH	CISH	3378.07	1.04766	0.107165	9.77605	1.43e-22	7.56e-22
CIT	CIT	1361.62	1.93953	0.0932542	20.7983	4.48e-96	2.85e-94
CITED1	CITED1	359.659	-1.78626	0.234445	-7.61909	2.55e-14	8.84e-14
CKAP2	CKAP2	2204.06	1.37477	0.0814967	16.869	7.6e-64	1.88e-62
CKAP2L	CKAP2L	706.53	3.31148	0.119341	27.748	1.84e-169	7.93e-167
CKMT1A	CKMT1A	263.352	1.70017	0.178247	9.53831	1.45e-21	7.33e-21
CKMT1B	CKMT1B	302.951	1.63921	0.185265	8.84792	8.92e-19	3.93e-18
CKMT2	CKMT2	125.826	-2.49203	0.119433	-20.8655	1.1e-96	7.14e-95
CKS2	CKS2	1940.53	2.69426	0.0985045	27.3516	1.03e-164	3.67e-162
CLCA4	CLCA4	41.8337	-3.21151	0.262587	-12.2303	2.14e-34	1.92e-33
CLCA4-AS1	CLCA4-AS1	1.55234	-2.27202	0.201944	-11.2507	2.3e-29	1.66e-28
CLCN2	CLCN2	601.001	1.32318	0.0777053	17.0282	5.08e-65	1.29e-63
CLCN4	CLCN4	412.755	-1.09886	0.155576	-7.06319	1.63e-12	5.07e-12
CLCN6	CLCN6	1029.52	-1.01643	0.0521855	-19.4772	1.71e-84	7.82e-83
CLCNKB	CLCNKB	16.1417	-1.04507	0.159837	-6.53836	6.22e-11	1.77e-10
CLDN11	CLDN11	666.966	-2.41391	0.14959	-16.1369	1.4e-58	2.89e-57
CLDN14	CLDN14	37.9935	1.46476	0.158687	9.23048	2.69e-20	1.28e-19
CLDN14-AS1	CLDN14-AS1	26.4216	1.36748	0.120234	11.3735	5.67e-30	4.2e-29
CLDN18	CLDN18	12.671	-1.38615	0.123835	-11.1934	4.39e-29	3.12e-28
CLDN19	CLDN19	82.9537	-3.51582	0.251934	-13.9553	2.92e-44	3.81e-43
CLDN25	CLDN25	6.35083	4.06155	0.348739	11.6464	2.39e-31	1.89e-30
CLDN3	CLDN3	4826.69	1.43952	0.145742	9.87712	5.23e-23	2.82e-22
CLDN5	CLDN5	932.102	-2.61679	0.149609	-17.4908	1.68e-68	4.84e-67
CLDN6	CLDN6	42.4706	3.71585	0.290601	12.7868	1.94e-37	1.93e-36
CLDN7	CLDN7	6336.42	1.30001	0.0920934	14.1162	3.02e-45	4.09e-44
CLDN8	CLDN8	798.169	-2.03115	0.213808	-9.49988	2.1e-21	1.05e-20
CLDN9	CLDN9	79.1685	2.42219	0.181518	13.3441	1.28e-40	1.45e-39
CLDND2	CLDND2	30.513	-1.3643	0.138386	-9.85867	6.29e-23	3.38e-22
CLEC10A	CLEC10A	299.427	-1.28254	0.179432	-7.14777	8.82e-13	2.8e-12
CLEC11A	CLEC11A	1006.69	1.41341	0.124596	11.344	7.95e-30	5.85e-29
CLEC14A	CLEC14A	1328.13	-1.33837	0.0915053	-14.6261	1.91e-48	2.88e-47
CLEC17A	CLEC17A	30.618	1.16751	0.212388	5.49706	3.86e-08	9.05e-08
CLEC18B	CLEC18B	12.4244	1.25327	0.173932	7.20553	5.78e-13	1.85e-12
CLEC1A	CLEC1A	182.645	-1.66119	0.0936505	-17.7382	2.13e-70	6.49e-69
CLEC3A	CLEC3A	10426.4	5.84586	0.449236	13.0129	1.03e-38	1.08e-37
CLEC3B	CLEC3B	873.874	-3.94493	0.132637	-29.7423	2.18e-194	1.96e-191
CLEC4C	CLEC4C	10.4405	1.28535	0.265126	4.84808	1.25e-06	2.6e-06
CLEC4G	CLEC4G	17.9045	-3.18429	0.242795	-13.1151	2.7e-39	2.9e-38
CLEC4GP1	CLEC4GP1	4.97791	-3.01876	0.291372	-10.3605	3.75e-25	2.24e-24
CLEC4M	CLEC4M	3.01822	-2.17857	0.244897	-8.89589	5.8e-19	2.57e-18
CLEC5A	CLEC5A	385.611	3.25665	0.144041	22.6092	3.52e-113	3.5e-111
CLEC6A	CLEC6A	7.56555	2.74078	0.287689	9.52686	1.62e-21	8.16e-21
CLEC7A	CLEC7A	758.361	1.38924	0.136094	10.2079	1.83e-24	1.06e-23
CLGN	CLGN	1162.82	2.68931	0.189563	14.1869	1.1e-45	1.52e-44
CLIC2	CLIC2	819.197	-1.25493	0.0937404	-13.3873	7.18e-41	8.24e-40
CLIC3	CLIC3	330.881	1.81472	0.172329	10.5305	6.25e-26	3.87e-25
CLIC5	CLIC5	555.73	-2.56806	0.129251	-19.8688	7.57e-88	3.83e-86
CLIC6	CLIC6	5553.74	2.0406	0.259304	7.86955	3.56e-15	1.29e-14
CLIP4	CLIP4	1187.11	-1.77539	0.123922	-14.3267	1.49e-46	2.1e-45
CLLU1-AS1	CLLU1-AS1	8.29241	1.90711	0.298095	6.39765	1.58e-10	4.37e-10
CLMAT3	CLMAT3	7.88774	-1.51124	0.132739	-11.385	4.97e-30	3.69e-29
CLMP	CLMP	2610.96	-2.4897	0.110213	-22.59	5.44e-113	5.34e-111
CLN3	CLN3	2317.09	1.02032	0.07434	13.7251	7.19e-43	8.93e-42
CLPS	CLPS	22.0919	2.9682	0.244028	12.1634	4.87e-34	4.3e-33
CLPSL1	CLPSL1	146.255	2.9688	0.215003	13.8082	2.27e-43	2.88e-42
CLPSL2	CLPSL2	88.4387	3.4325	0.194681	17.6315	1.41e-69	4.21e-68
CLRN1	CLRN1	2.01618	2.21782	0.315649	7.02623	2.12e-12	6.56e-12
CLRN1-AS1	CLRN1-AS1	10.6212	3.07772	0.254336	12.101	1.04e-33	9.07e-33
CLSPN	CLSPN	467.152	2.83005	0.128176	22.0794	4.99e-108	4.27e-106
CLVS1	CLVS1	16.56	-1.52601	0.148414	-10.2821	8.48e-25	4.98e-24
CLXN	CLXN	71.0164	-2.27865	0.201846	-11.289	1.49e-29	1.08e-28
CMA1	CMA1	56.1722	-2.89006	0.204127	-14.1582	1.66e-45	2.27e-44
CMPK2	CMPK2	1108.51	1.42175	0.13571	10.4764	1.11e-25	6.77e-25
CMTM5	CMTM5	28.2896	-1.19476	0.309257	-3.86333	0.000111852	0.000197143
CNFN	CNFN	281.708	1.30493	0.135706	9.61586	6.85e-22	3.51e-21
CNGA1	CNGA1	108.221	-1.14598	0.195662	-5.85695	4.71e-09	1.18e-08
CNGA3	CNGA3	36.1874	1.43278	0.229258	6.24964	4.11e-10	1.11e-09
CNIH2	CNIH2	287.567	3.35703	0.145064	23.1418	1.76e-118	2.03e-116
CNIH3-AS2	CNIH3-AS2	8.01468	1.35157	0.161392	8.37445	5.55e-17	2.22e-16
CNKSR2	CNKSR2	100.384	-2.1	0.164933	-12.7324	3.91e-37	3.83e-36
CNN1	CNN1	2158.38	-3.14272	0.150775	-20.8438	1.74e-96	1.12e-94
CNR1	CNR1	197.191	-1.18351	0.213566	-5.54167	3e-08	7.08e-08
CNR2	CNR2	35.2456	1.61298	0.218539	7.38073	1.57e-13	5.22e-13
CNRIP1	CNRIP1	603.772	-1.81619	0.0906398	-20.0374	2.6e-89	1.38e-87
CNTFR	CNTFR	533.232	-2.72566	0.220853	-12.3415	5.41e-35	4.96e-34
CNTN5	CNTN5	22.9134	2.40345	0.320605	7.49659	6.55e-14	2.22e-13
CNTN6	CNTN6	21.9109	-1.58026	0.205134	-7.70354	1.32e-14	4.66e-14
CNTNAP2	CNTNAP2	2274.29	3.96071	0.232562	17.0308	4.85e-65	1.24e-63
CNTNAP3	CNTNAP3	110.739	-2.30917	0.184548	-12.5126	6.37e-36	6.04e-35
CNTNAP3B	CNTNAP3B	56.0256	-2.72275	0.179467	-15.1713	5.48e-52	9.24e-51
CNTNAP3P2	CNTNAP3P2	16.5676	-2.86622	0.184079	-15.5706	1.15e-54	2.11e-53
COA6	COA6	1370	1.27819	0.0723091	17.6767	6.34e-70	1.91e-68
COBLL1	COBLL1	2747.22	-1.39543	0.0969969	-14.3863	6.31e-47	8.97e-46
COL10A1	COL10A1	8742.63	7.11753	0.166039	42.8666	0	0
COL11A1	COL11A1	12170.1	6.17487	0.18725	32.9767	1.75e-238	5.96e-235
COL12A1	COL12A1	34302.7	1.44146	0.130142	11.0761	1.64e-28	1.14e-27
COL14A1	COL14A1	7622.12	-1.61668	0.155107	-10.423	1.95e-25	1.18e-24
COL17A1	COL17A1	3655.71	-2.82791	0.221593	-12.7617	2.68e-37	2.65e-36
COL1A1	COL1A1	403806	2.2227	0.134936	16.4723	5.8e-61	1.29e-59
COL1A2	COL1A2	293867	1.55019	0.132237	11.7228	9.74e-32	7.79e-31
COL20A1	COL20A1	5.6302	1.4522	0.262013	5.54248	2.98e-08	7.05e-08
COL22A1	COL22A1	524.579	3.21929	0.204264	15.7605	5.82e-56	1.11e-54
COL24A1	COL24A1	176.283	1.31906	0.106864	12.3433	5.29e-35	4.85e-34
COL25A1	COL25A1	66.6059	-2.79938	0.160199	-17.4744	2.24e-68	6.41e-67
COL25A1-DT	COL25A1-DT	1.08716	-1.56513	0.182464	-8.57772	9.68e-18	4.03e-17
COL2A1	COL2A1	3478.08	3.54452	0.316439	11.2012	4.02e-29	2.87e-28
COL3A1	COL3A1	266249	1.34027	0.134854	9.93862	2.83e-23	1.55e-22
COL4A2-AS1	COL4A2-AS1	3.77226	-1.97792	0.141729	-13.9556	2.91e-44	3.8e-43
COL4A2-AS2	COL4A2-AS2	2.36399	-1.77397	0.232103	-7.64304	2.12e-14	7.38e-14
COL4A3	COL4A3	75.7498	-1.41677	0.164207	-8.62795	6.25e-18	2.63e-17
COL4A6	COL4A6	521.477	-1.32523	0.207285	-6.39327	1.62e-10	4.49e-10
COL5A1	COL5A1	29278.7	1.84989	0.12288	15.0545	3.23e-51	5.3e-50
COL5A2	COL5A2	30797.5	1.67997	0.124419	13.5026	1.51e-41	1.78e-40
COL6A4P1	COL6A4P1	6.10461	2.15469	0.271589	7.93362	2.13e-15	7.81e-15
COL6A5	COL6A5	15.1122	3.25904	0.274844	11.8578	1.96e-32	1.61e-31
COL6A6	COL6A6	289.609	-3.30745	0.173765	-19.0341	8.91e-81	3.71e-79
COL9A1	COL9A1	45.4103	1.97166	0.30503	6.46382	1.02e-10	2.86e-10
COL9A3	COL9A3	682.805	1.8715	0.222519	8.41052	4.08e-17	1.64e-16
COLCA1	COLCA1	217.048	-1.51649	0.202481	-7.48952	6.91e-14	2.34e-13
COLEC10	COLEC10	10.9174	1.21215	0.150604	8.04855	8.38e-16	3.14e-15
COLGALT2	COLGALT2	139.43	-1.27498	0.15462	-8.24588	1.64e-16	6.4e-16
COMMD3-BMI1	COMMD3-BMI1	4.87999	1.96074	0.268383	7.30576	2.76e-13	9e-13
COMMD5	COMMD5	2010.88	1.03991	0.0698118	14.8959	3.5e-50	5.57e-49
COMP	COMP	7872.79	4.43559	0.171422	25.8752	1.27e-147	2.93e-145
COMTD1	COMTD1	620.176	1.69836	0.123201	13.7853	3.13e-43	3.93e-42
COPDA1	COPDA1	46.0972	4.14097	0.27265	15.1878	4.26e-52	7.2e-51
COPE	COPE	7318.53	1.05132	0.0723372	14.5335	7.43e-48	1.09e-46
COQ8A	COQ8A	4045.9	-1.39477	0.0820095	-17.0075	7.23e-65	1.84e-63
CORIN	CORIN	383.041	1.79763	0.155503	11.56	6.57e-31	5.09e-30
CORO1A	CORO1A	3062.27	1.0618	0.123233	8.61619	6.92e-18	2.91e-17
CORO2A	CORO2A	3193.04	1.42172	0.0971829	14.6293	1.83e-48	2.75e-47
CORO2B	CORO2B	287.28	-2.41555	0.110753	-21.8103	1.85e-105	1.47e-103
CORO6	CORO6	512.232	1.37627	0.221282	6.21953	4.99e-10	1.33e-09
COX17P1	COX17P1	5.63928	1.37467	0.161323	8.5212	1.58e-17	6.51e-17
COX20P1	COX20P1	45.7476	1.42996	0.227737	6.27899	3.41e-10	9.22e-10
COX6A2	COX6A2	6.59515	2.50802	0.281355	8.91407	4.92e-19	2.19e-18
COX6B1P5	COX6B1P5	2.76142	1.14806	0.167684	6.84654	7.57e-12	2.27e-11
COX6C	COX6C	34761.3	2.78652	0.152049	18.3265	5.09e-75	1.8e-73
COX6CP1	COX6CP1	192.44	2.62144	0.28519	9.19191	3.86e-20	1.82e-19
COX6CP2	COX6CP2	1.95007	1.77021	0.249706	7.08919	1.35e-12	4.22e-12
COX7A1	COX7A1	614.518	-2.59585	0.138326	-18.7662	1.43e-78	5.64e-77
CPA1	CPA1	18.7907	-4.19454	0.232284	-18.0578	6.85e-73	2.25e-71
CPA2	CPA2	8.23646	-2.4748	0.222165	-11.1395	8.06e-29	5.66e-28
CPA4	CPA4	331.254	1.20277	0.212617	5.657	1.54e-08	3.72e-08
CPA6	CPA6	155.133	2.57242	0.28311	9.08632	1.02e-19	4.71e-19
CPAMD8	CPAMD8	879.189	-1.22607	0.160184	-7.65412	1.95e-14	6.79e-14
CPB1	CPB1	48900	4.63129	0.391732	11.8226	2.98e-32	2.43e-31
CPEB1	CPEB1	112.595	-1.50407	0.127727	-11.7757	5.21e-32	4.2e-31
CPED1	CPED1	1091.79	-2.98472	0.135791	-21.9802	4.45e-107	3.68e-105
CPLX2	CPLX2	139.886	6.12211	0.49631	12.3352	5.85e-35	5.35e-34
CPM	CPM	2406.35	-2.13401	0.118988	-17.9346	6.33e-72	2.01e-70
CPNE7	CPNE7	571.736	2.56812	0.175061	14.6699	1.01e-48	1.53e-47
CPNE8	CPNE8	491.783	-1.03747	0.104977	-9.88283	4.94e-23	2.67e-22
CPNE9	CPNE9	14.081	1.16682	0.147808	7.89417	2.92e-15	1.06e-14
CPS1	CPS1	360.289	-1.15784	0.160327	-7.22171	5.13e-13	1.65e-12
CPSF1P1	CPSF1P1	48.9208	1.00683	0.190784	5.27734	1.31e-07	2.96e-07
CPXM2	CPXM2	2126.76	-1.36029	0.124613	-10.9162	9.65e-28	6.47e-27
CR1	CR1	110.313	-1.28986	0.179136	-7.20043	6e-13	1.92e-12
CR1L	CR1L	10.4519	1.42271	0.194126	7.3288	2.32e-13	7.62e-13
CR2	CR2	202.392	1.48003	0.283244	5.22531	1.74e-07	3.88e-07
CRABP1	CRABP1	1659.85	1.06694	0.305913	3.48773	0.000487149	0.000808493
CRABP2	CRABP2	31419.1	2.16799	0.146115	14.8376	8.37e-50	1.32e-48
CRACD	CRACD	382.02	2.58525	0.153619	16.8289	1.5e-63	3.67e-62
CRADD-AS1	CRADD-AS1	4.04222	-1.65178	0.169244	-9.75976	1.68e-22	8.85e-22
CRAT37	CRAT37	10.8051	2.21858	0.302787	7.32721	2.35e-13	7.71e-13
CRB2	CRB2	52.4429	-2.15549	0.148159	-14.5484	5.97e-48	8.79e-47
CRB3	CRB3	899.787	1.61258	0.0823515	19.5817	2.21e-85	1.04e-83
CREB3L1	CREB3L1	4433.83	2.2512	0.13456	16.7301	7.91e-63	1.89e-61
CREB3L3	CREB3L3	3.52612	1.30018	0.223331	5.82177	5.82e-09	1.45e-08
CREB3L4	CREB3L4	7596.38	1.68445	0.105131	16.0223	8.92e-58	1.8e-56
CREB5	CREB5	511.352	-2.11345	0.120685	-17.5121	1.16e-68	3.34e-67
CREG2	CREG2	30.5054	1.60531	0.155215	10.3425	4.53e-25	2.69e-24
CRHBP	CRHBP	61.4949	-3.97725	0.135042	-29.4519	1.19e-190	9.84e-188
CRHR2	CRHR2	16.9454	-1.74995	0.133473	-13.1108	2.85e-39	3.06e-38
CRIM1	CRIM1	8601.66	-1.68508	0.0974164	-17.2977	4.9e-67	1.34e-65
CRIM1-DT	CRIM1-DT	87.6206	-1.32138	0.115708	-11.42	3.32e-30	2.49e-29
CRIP1	CRIP1	512.948	1.49609	0.136078	10.9944	4.07e-28	2.77e-27
CRIP1P2	CRIP1P2	2.39186	1.76017	0.262462	6.70639	1.99e-11	5.84e-11
CRIP1P4	CRIP1P4	1.92797	1.70309	0.26653	6.38983	1.66e-10	4.59e-10
CRISP3	CRISP3	1118.51	3.55251	0.327305	10.8538	1.91e-27	1.27e-26
CRMA	CRMA	2.50223	-1.55657	0.21933	-7.09695	1.28e-12	4e-12
CROCC2	CROCC2	25.5504	1.97014	0.276595	7.12282	1.06e-12	3.34e-12
CRTAC1	CRTAC1	240.421	-1.38481	0.217631	-6.36309	1.98e-10	5.43e-10
CRTAP	CRTAP	10908.2	-1.12162	0.0533438	-21.0262	3.77e-98	2.51e-96
CRY2	CRY2	3255.42	-1.24329	0.0656989	-18.924	7.24e-80	2.95e-78
CRYAB	CRYAB	7409.38	-2.86654	0.201283	-14.2414	5.07e-46	7.03e-45
CRYBA2	CRYBA2	8.94966	3.94076	0.346366	11.3775	5.42e-30	4.02e-29
CRYBA4	CRYBA4	4.48062	1.12477	0.208891	5.38447	7.27e-08	1.67e-07
CRYBG2	CRYBG2	185.385	3.19992	0.156656	20.4264	9.75e-93	5.65e-91
CRYBG3	CRYBG3	1155.62	-1.98931	0.133131	-14.9426	1.74e-50	2.8e-49
CRYM	CRYM	190.786	1.20946	0.237717	5.08784	3.62e-07	7.89e-07
CSAG1	CSAG1	45.0869	8.21363	0.466018	17.6251	1.58e-69	4.7e-68
CSF3	CSF3	26.9047	-3.72532	0.322308	-11.5583	6.71e-31	5.2e-30
CSF3R	CSF3R	1705.87	1.07052	0.139224	7.68919	1.48e-14	5.19e-14
CSMD2	CSMD2	218.594	2.00584	0.144238	13.9065	5.78e-44	7.46e-43
CSMD3	CSMD3	40.176	3.71144	0.401867	9.23549	2.57e-20	1.22e-19
CSN1S1	CSN1S1	48.973	-3.593	0.452246	-7.94481	1.94e-15	7.16e-15
CSP2	CSP2	9.23355	-1.53775	0.145507	-10.5682	4.18e-26	2.61e-25
CSPG5	CSPG5	146.908	1.00551	0.134815	7.45842	8.76e-14	2.95e-13
CSRNP1	CSRNP1	2950.84	-1.88948	0.0909872	-20.7665	8.7e-96	5.48e-94
CSRNP3	CSRNP3	242.011	-2.40606	0.142023	-16.9414	2.23e-64	5.59e-63
CSRP1	CSRP1	20542.5	-1.2817	0.0782921	-16.3708	3.09e-60	6.69e-59
CSRP3-AS1	CSRP3-AS1	1.25128	1.75885	0.257975	6.8179	9.24e-12	2.76e-11
CST1	CST1	747.49	6.83173	0.259847	26.2913	2.41e-152	6.24e-150
CST2	CST2	155.529	4.99835	0.217045	23.0291	2.38e-117	2.65e-115
CST4	CST4	160.414	7.48597	0.340134	22.0089	2.37e-107	1.97e-105
CST5	CST5	205.72	7.13414	0.435571	16.3788	2.71e-60	5.88e-59
CST6	CST6	242.16	2.66886	0.197206	13.5333	9.94e-42	1.18e-40
CST9	CST9	746.753	2.85593	0.396366	7.20528	5.79e-13	1.86e-12
CST9L	CST9L	19.5977	3.01034	0.402522	7.47871	7.51e-14	2.53e-13
CSTL1	CSTL1	4.36805	3.16734	0.355165	8.91794	4.75e-19	2.11e-18
CT55	CT55	1.50608	1.10466	0.280366	3.94007	8.15e-05	0.000145307
CTBP2P8	CTBP2P8	6.64906	-1.51936	0.118946	-12.7736	2.3e-37	2.28e-36
CTHRC1	CTHRC1	5506.66	2.48975	0.110454	22.5411	1.64e-112	1.59e-110
CTIF	CTIF	2833.05	-1.25741	0.0731417	-17.1914	3.08e-66	8.16e-65
CTLA4	CTLA4	136.423	1.27381	0.169045	7.5353	4.87e-14	1.66e-13
CTNNA2	CTNNA2	25.5054	2.13642	0.295385	7.23267	4.74e-13	1.53e-12
CTNNA3	CTNNA3	35.6508	-1.41362	0.166201	-8.50551	1.81e-17	7.43e-17
CTNNAL1	CTNNAL1	1434.1	-1.06246	0.0806861	-13.1678	1.34e-39	1.46e-38
CTNND2	CTNND2	958.386	1.16006	0.184944	6.2725	3.55e-10	9.6e-10
CTPS1	CTPS1	2198.32	1.33531	0.0917672	14.5511	5.75e-48	8.49e-47
CTSD	CTSD	61469.3	1.27611	0.10913	11.6935	1.38e-31	1.1e-30
CTSE	CTSE	18.1075	1.33346	0.303402	4.39501	1.11e-05	2.14e-05
CTSG	CTSG	146.964	-1.81147	0.197718	-9.16189	5.1e-20	2.38e-19
CTTNBP2	CTTNBP2	292.784	-1.36732	0.161279	-8.47796	2.29e-17	9.36e-17
CTXN1	CTXN1	1489.3	2.92787	0.124425	23.5311	1.96e-122	2.47e-120
CTXN2	CTXN2	1.81372	2.14791	0.297586	7.2178	5.28e-13	1.7e-12
CUBN	CUBN	153.735	-1.65279	0.101836	-16.2299	3.1e-59	6.48e-58
CWH43	CWH43	77.0693	2.21346	0.298216	7.42233	1.15e-13	3.84e-13
CX3CL1	CX3CL1	5660.57	-2.37911	0.150287	-15.8305	1.92e-56	3.72e-55
CX3CR1	CX3CR1	726.545	-1.00727	0.155157	-6.49195	8.47e-11	2.39e-10
CXADRP3	CXADRP3	82.0753	4.55702	0.36918	12.3436	5.27e-35	4.83e-34
CXCL10	CXCL10	3217.01	3.63085	0.186679	19.4497	2.93e-84	1.33e-82
CXCL11	CXCL11	862.283	3.79177	0.189269	20.0338	2.79e-89	1.48e-87
CXCL12	CXCL12	8715.85	-1.88969	0.109315	-17.2868	5.92e-67	1.62e-65
CXCL13	CXCL13	2276.74	2.40547	0.262585	9.16075	5.15e-20	2.4e-19
CXCL17	CXCL17	1383.64	2.50043	0.265083	9.43266	4e-21	1.97e-20
CXCL2	CXCL2	270.251	-3.38658	0.191242	-17.7084	3.61e-70	1.1e-68
CXCL3	CXCL3	33.7705	-1.87663	0.184433	-10.1752	2.56e-24	1.47e-23
CXCL9	CXCL9	6177.5	3.12975	0.202982	15.4189	1.22e-53	2.18e-52
CXCR2	CXCR2	36.4011	-2.03048	0.140366	-14.4656	2e-47	2.89e-46
CXCR2P1	CXCR2P1	169.163	3.1951	0.23031	13.873	9.23e-44	1.18e-42
CXCR3	CXCR3	282.768	1.66031	0.161787	10.2623	1.04e-24	6.09e-24
CXCR4	CXCR4	5379.38	1.10191	0.108523	10.1537	3.19e-24	1.82e-23
CXCR5	CXCR5	12.3058	2.24805	0.236343	9.51183	1.87e-21	9.38e-21
CXXC1P1	CXXC1P1	1.58561	1.19326	0.22995	5.18918	2.11e-07	4.69e-07
CYB561	CYB561	12390.5	1.31368	0.0877227	14.9754	1.06e-50	1.72e-49
CYB561D2	CYB561D2	1564.42	1.03183	0.0744144	13.866	1.02e-43	1.3e-42
CYBRD1	CYBRD1	19730.2	-1.14183	0.13315	-8.5755	9.87e-18	4.11e-17
CYFIP2	CYFIP2	2714.33	1.37058	0.123008	11.1422	7.82e-29	5.49e-28
CYGB	CYGB	1007.47	-1.3645	0.105023	-12.9924	1.35e-38	1.41e-37
CYP11A1	CYP11A1	70.1099	-1.55403	0.142125	-10.9343	7.9e-28	5.32e-27
CYP1A1	CYP1A1	43.8668	-3.76452	0.317438	-11.8591	1.93e-32	1.59e-31
CYP1B1-AS1	CYP1B1-AS1	56.8521	-1.13688	0.123278	-9.22206	2.91e-20	1.38e-19
CYP21A1P	CYP21A1P	207.358	2.25855	0.188561	11.9779	4.64e-33	3.93e-32
CYP21A2	CYP21A2	178.693	2.38512	0.184379	12.936	2.82e-38	2.9e-37
CYP26B1	CYP26B1	455.908	-2.26853	0.144601	-15.6882	1.82e-55	3.42e-54
CYP27B1	CYP27B1	245.291	1.49014	0.144031	10.346	4.36e-25	2.6e-24
CYP2A13	CYP2A13	8.67701	2.23075	0.375191	5.94564	2.75e-09	7e-09
CYP2A6	CYP2A6	847.081	2.11507	0.340244	6.21633	5.09e-10	1.36e-09
CYP2A7	CYP2A7	173.796	2.31894	0.36499	6.35345	2.11e-10	5.77e-10
CYP2A7P2	CYP2A7P2	41.6146	4.50634	0.375346	12.0058	3.31e-33	2.82e-32
CYP2B6	CYP2B6	11.6765	2.31007	0.296525	7.79047	6.68e-15	2.39e-14
CYP2B7P	CYP2B7P	8065.78	4.36263	0.284833	15.3164	5.94e-53	1.04e-51
CYP2F1	CYP2F1	6.0711	2.23795	0.32828	6.81719	9.28e-12	2.77e-11
CYP2T1P	CYP2T1P	2946.33	3.01716	0.245944	12.2676	1.35e-34	1.22e-33
CYP2T3P	CYP2T3P	25.6084	2.87803	0.323683	8.89153	6.03e-19	2.67e-18
CYP2U1	CYP2U1	663.923	-1.4246	0.0764617	-18.6315	1.78e-77	6.84e-76
CYP2U1-AS1	CYP2U1-AS1	3.76923	-2.60242	0.150078	-17.3405	2.33e-67	6.44e-66
CYP2W1	CYP2W1	5.87436	1.6378	0.255025	6.42212	1.34e-10	3.74e-10
CYP39A1	CYP39A1	248.035	-1.21898	0.173201	-7.03791	1.95e-12	6.04e-12
CYP3A4	CYP3A4	7.26791	-2.27467	0.161652	-14.0714	5.7e-45	7.64e-44
CYP3A43	CYP3A43	3.67188	-1.01906	0.168044	-6.06425	1.33e-09	3.44e-09
CYP3A5	CYP3A5	76.9316	-1.1265	0.126	-8.94047	3.88e-19	1.73e-18
CYP46A1	CYP46A1	74.3281	-1.2909	0.109166	-11.8251	2.89e-32	2.36e-31
CYP4F12	CYP4F12	132.853	-1.00554	0.209788	-4.79315	1.64e-06	3.39e-06
CYP4F2	CYP4F2	7.25236	1.0842	0.295781	3.66556	0.000246799	0.000421267
CYP4F23P	CYP4F23P	397.207	2.11638	0.193554	10.9343	7.9e-28	5.32e-27
CYP4F24P	CYP4F24P	11.6632	-2.61515	0.264456	-9.88877	4.66e-23	2.52e-22
CYP4F30P	CYP4F30P	21.6036	2.78143	0.389747	7.1365	9.57e-13	3.03e-12
CYP4F35P	CYP4F35P	94.6756	1.24251	0.219307	5.66561	1.47e-08	3.54e-08
CYP4F62P	CYP4F62P	23.4322	2.55563	0.420235	6.08144	1.19e-09	3.11e-09
CYP4F8	CYP4F8	676.717	1.82585	0.337159	5.41541	6.11e-08	1.41e-07
CYP4Z1	CYP4Z1	4441.7	1.41207	0.304388	4.63903	3.5e-06	7.04e-06
CYP4Z2P	CYP4Z2P	577.031	1.00198	0.241138	4.15521	3.25e-05	6.01e-05
CYP7A1	CYP7A1	3.43958	-1.74929	0.150788	-11.601	4.07e-31	3.18e-30
CYRIA	CYRIA	930.552	-1.60992	0.0969715	-16.602	6.74e-62	1.55e-60
CYSRT1	CYSRT1	138.483	2.24893	0.137982	16.2987	1.01e-59	2.14e-58
CYTL1	CYTL1	75.2013	-1.3575	0.134671	-10.0802	6.76e-24	3.8e-23
CYTOR	CYTOR	913.33	1.14986	0.0941059	12.2188	2.47e-34	2.2e-33
CYYR1	CYYR1	1423.59	-1.77561	0.109102	-16.2748	1.49e-59	3.15e-58
DAAM2	DAAM2	1254.41	-1.87331	0.108489	-17.2673	8.3e-67	2.24e-65
DAAM2-AS1	DAAM2-AS1	60.1699	-2.43267	0.129855	-18.7338	2.62e-78	1.03e-76
DAB2IP	DAB2IP	4239.57	-1.14189	0.0687128	-16.6182	5.14e-62	1.19e-60
DACT2	DACT2	55.6347	-3.06432	0.22596	-13.5613	6.79e-42	8.12e-41
DAPK2	DAPK2	1026.81	-1.02526	0.0940991	-10.8955	1.21e-27	8.09e-27
DAZL	DAZL	6.31661	2.31615	0.291411	7.94805	1.89e-15	6.97e-15
DBF4	DBF4	906.99	1.2585	0.0764486	16.4621	6.87e-61	1.52e-59
DBF4P1	DBF4P1	8.96051	1.06654	0.125543	8.49545	1.97e-17	8.09e-17
DBNDD1	DBNDD1	2613.11	1.87237	0.108572	17.2454	1.21e-66	3.25e-65
DBX2	DBX2	18.5554	-2.10943	0.176361	-11.9609	5.7e-33	4.8e-32
DCAF10	DCAF10	6819.44	1.06489	0.100939	10.5499	5.09e-26	3.16e-25
DCAF13	DCAF13	4208.85	1.28496	0.0797712	16.108	2.24e-58	4.59e-57
DCD	DCD	574.35	2.59574	0.500785	5.18333	2.18e-07	4.83e-07
DCDC1	DCDC1	229.154	1.7539	0.190609	9.20154	3.53e-20	1.66e-19
DCDC2	DCDC2	582.751	-1.10071	0.212773	-5.17315	2.3e-07	5.09e-07
DCN	DCN	45511.4	-1.94854	0.128846	-15.1231	1.14e-51	1.91e-50
DCST1-AS1	DCST1-AS1	161.177	1.27444	0.101608	12.5427	4.36e-36	4.16e-35
DCSTAMP	DCSTAMP	57.6134	1.18802	0.172358	6.89274	5.47e-12	1.65e-11
DCT	DCT	42.7836	-2.60054	0.250262	-10.3913	2.72e-25	1.63e-24
DCTPP1	DCTPP1	3186.67	1.26827	0.0679194	18.6732	8.18e-78	3.17e-76
DCUN1D3	DCUN1D3	1018.14	-1.25608	0.0563844	-22.277	6.18e-110	5.57e-108
DDIAS	DDIAS	506.903	1.73692	0.109101	15.9202	4.59e-57	9.09e-56
DDN	DDN	32.3701	2.11052	0.207782	10.1574	3.07e-24	1.76e-23
DDR2	DDR2	4410.22	-2.76781	0.110212	-25.1135	3.55e-139	6.26e-137
DDX11-AS1	DDX11-AS1	59.5864	1.49611	0.106872	13.9992	1.58e-44	2.08e-43
DDX11L10	DDX11L10	6.14582	1.62876	0.243192	6.69743	2.12e-11	6.19e-11
DDX20P1	DDX20P1	5.19721	1.04078	0.175032	5.94621	2.74e-09	6.98e-09
DDX39A	DDX39A	3844.31	1.49052	0.0818057	18.2203	3.56e-74	1.23e-72
DDX3ILA1	DDX3ILA1	11.4532	3.25146	0.300074	10.8355	2.34e-27	1.54e-26
DDX59-AS1	DDX59-AS1	22.082	1.42742	0.189392	7.53684	4.81e-14	1.64e-13
DEFB109A	DEFB109A	1.6064	-1.1522	0.236297	-4.87607	1.08e-06	2.27e-06
DEFB124	DEFB124	4.03828	-1.22707	0.227379	-5.39661	6.79e-08	1.56e-07
DEFB131E	DEFB131E	4.03578	1.85673	0.206763	8.98	2.71e-19	1.22e-18
DEFB132	DEFB132	118.428	-4.9925	0.245322	-20.3508	4.57e-92	2.62e-90
DEGS2	DEGS2	4416.62	2.56761	0.1694	15.1571	6.8e-52	1.14e-50
DELEC1	DELEC1	15.3828	1.29535	0.226956	5.70748	1.15e-08	2.79e-08
DENND1B	DENND1B	3383.82	1.24128	0.124715	9.95289	2.45e-23	1.34e-22
DENND2A	DENND2A	378.631	-2.24376	0.110576	-20.2916	1.53e-91	8.62e-90
DENND2C	DENND2C	178.135	-1.31507	0.104042	-12.6397	1.27e-36	1.24e-35
DENND3-AS1	DENND3-AS1	65.8521	1.15517	0.110081	10.4937	9.23e-26	5.66e-25
DENND6A-AS1	DENND6A-AS1	2.42921	-1.1535	0.126703	-9.10401	8.71e-20	4.02e-19
DEPDC1	DEPDC1	797.662	3.27738	0.135725	24.1472	7.99e-129	1.14e-126
DEPDC1-AS1	DEPDC1-AS1	3.65781	2.89129	0.273172	10.5842	3.53e-26	2.21e-25
DEPDC1B	DEPDC1B	369.257	2.96214	0.12003	24.6783	1.83e-134	2.9e-132
DEPDC7	DEPDC7	109.172	1.1454	0.118671	9.65189	4.83e-22	2.49e-21
DEPP1	DEPP1	6043.54	-2.31392	0.123336	-18.7611	1.57e-78	6.19e-77
DERL3	DERL3	1121.3	1.04123	0.141205	7.37388	1.66e-13	5.49e-13
DES	DES	397.585	-3.03001	0.243844	-12.426	1.89e-35	1.76e-34
DEUP1	DEUP1	31.9456	1.02694	0.186638	5.50232	3.75e-08	8.79e-08
DGAT2	DGAT2	3882.19	-3.42785	0.161055	-21.2837	1.61e-100	1.14e-98
DGCR5	DGCR5	24.8909	1.24349	0.181201	6.86249	6.77e-12	2.03e-11
DGKB	DGKB	10.2061	-1.09664	0.159225	-6.8874	5.68e-12	1.72e-11
DGKI	DGKI	242.424	-1.14717	0.129384	-8.86643	7.55e-19	3.34e-18
DHCR24-DT	DHCR24-DT	18.3856	1.44189	0.118257	12.1928	3.39e-34	3.01e-33
DHCR7	DHCR7	5735.89	1.15318	0.113961	10.1191	4.55e-24	2.58e-23
DHDH	DHDH	58.389	1.46708	0.151636	9.67504	3.85e-22	2e-21
DHRS13	DHRS13	358.784	1.18924	0.0987177	12.0469	2.01e-33	1.74e-32
DHRS2	DHRS2	9177.53	2.81336	0.307171	9.15895	5.24e-20	2.44e-19
DHRS3	DHRS3	3240.66	-1.16062	0.0931237	-12.4633	1.18e-35	1.12e-34
DHRS9	DHRS9	128.609	-1.22673	0.167613	-7.31882	2.5e-13	8.19e-13
DHX35-DT	DHX35-DT	4.95425	1.58194	0.190002	8.32595	8.37e-17	3.32e-16
DIAPH2	DIAPH2	1304.09	-1.20855	0.0806226	-14.9903	8.5e-51	1.38e-49
DIAPH3	DIAPH3	661.86	2.29717	0.121493	18.9078	9.83e-80	4e-78
DIO1	DIO1	719.311	3.54329	0.253725	13.9651	2.55e-44	3.34e-43
DIO3OS	DIO3OS	102.715	-1.80802	0.181781	-9.94612	2.62e-23	1.44e-22
DIP2C-AS1	DIP2C-AS1	31.604	-1.82721	0.165273	-11.0557	2.06e-28	1.42e-27
DIPK1A	DIPK1A	939.683	-1.15443	0.0782338	-14.7561	2.81e-49	4.34e-48
DIPK2B	DIPK2B	1505.67	-2.0587	0.0917842	-22.4298	2.02e-111	1.87e-109
DIRC1	DIRC1	10.779	1.2558	0.171914	7.30479	2.78e-13	9.06e-13
DISC1FP1	DISC1FP1	2.38191	-1.52645	0.265129	-5.75741	8.54e-09	2.1e-08
DISP3	DISP3	105.579	2.20303	0.195701	11.2571	2.14e-29	1.55e-28
DIXDC1	DIXDC1	2224.51	-1.46437	0.0824424	-17.7623	1.38e-70	4.26e-69
1	1	378.49	2.15577	0.259813	8.29739	1.06e-16	4.19e-16
3	3	3866.22	-1.19098	0.108156	-11.0116	3.36e-28	2.3e-27
4	4	9.22459	-1.42757	0.260109	-5.48836	4.06e-08	9.49e-08
DLC1	DLC1	3112.15	-1.81622	0.099983	-18.1653	9.71e-74	3.3e-72
DLEU2	DLEU2	237.587	1.12547	0.0857522	13.1246	2.38e-39	2.56e-38
DLG2	DLG2	176.61	-1.11852	0.122963	-9.09636	9.34e-20	4.3e-19
DLG3-AS1	DLG3-AS1	13.4583	1.93089	0.172131	11.2175	3.35e-29	2.4e-28
DLGAP2	DLGAP2	15.0516	-2.07585	0.156158	-13.2932	2.53e-40	2.84e-39
DLGAP3	DLGAP3	62.07	1.56562	0.168915	9.26868	1.88e-20	8.99e-20
DLGAP5	DLGAP5	1035.27	3.2886	0.121876	26.9832	2.33e-160	7.18e-158
DLK1	DLK1	423.61	-1.13805	0.456123	-2.49505	0.012594	0.0178598
DLK2	DLK2	129.143	-1.70545	0.108569	-15.7084	1.32e-55	2.5e-54
DLL3	DLL3	39.3459	2.78744	0.253468	10.9972	3.94e-28	2.69e-27
DLX1	DLX1	170.893	1.33936	0.276146	4.85019	1.23e-06	2.58e-06
DLX2	DLX2	193.147	2.16879	0.280684	7.72682	1.1e-14	3.89e-14
DLX2-DT	DLX2-DT	5.86641	2.9309	0.319644	9.16926	4.76e-20	2.23e-19
DLX3	DLX3	303.986	1.52795	0.170503	8.96142	3.21e-19	1.44e-18
DLX4	DLX4	112.018	2.02249	0.164535	12.2921	9.98e-35	9.03e-34
DLX5	DLX5	128.142	2.22997	0.193508	11.524	9.99e-31	7.65e-30
DLX6	DLX6	37.0239	2.27619	0.302682	7.52007	5.47e-14	1.86e-13
DLX6-AS1	DLX6-AS1	28.7176	1.54361	0.275671	5.59948	2.15e-08	5.14e-08
DMBX1	DMBX1	40.2407	3.07017	0.210752	14.5677	4.51e-48	6.68e-47
DMD	DMD	1587.25	-3.07896	0.146062	-21.0799	1.22e-98	8.29e-97
DMGDH	DMGDH	122.681	-2.87423	0.111522	-25.7728	1.79e-146	3.99e-144
DMP1	DMP1	6.21887	2.84325	0.24434	11.6364	2.69e-31	2.12e-30
DMRT1	DMRT1	9.24656	3.07171	0.401128	7.65769	1.89e-14	6.6e-14
DMRT2	DMRT2	71.5349	-2.88909	0.165197	-17.4887	1.75e-68	5.01e-67
DMRT3	DMRT3	66.9089	-1.34337	0.150916	-8.90141	5.51e-19	2.45e-18
DMRTA2	DMRTA2	8.7506	2.53634	0.34823	7.28353	3.25e-13	1.06e-12
DMRTC2	DMRTC2	14.9948	2.08509	0.347132	6.00662	1.89e-09	4.87e-09
DMTN	DMTN	1464.5	-1.25176	0.117285	-10.6728	1.36e-26	8.71e-26
DNA2	DNA2	568.206	1.69491	0.0927749	18.269	1.46e-74	5.1e-73
DNAAF11	DNAAF11	595.381	1.276	0.128492	9.93056	3.07e-23	1.67e-22
DNAAF3	DNAAF3	224.651	2.43854	0.160482	15.195	3.81e-52	6.47e-51
DNAAF3-AS1	DNAAF3-AS1	2.79011	2.6584	0.268003	9.9193	3.43e-23	1.87e-22
DNAAF6	DNAAF6	4.04295	2.23711	0.315871	7.08234	1.42e-12	4.43e-12
DNAAF8	DNAAF8	222.295	1.68745	0.118774	14.2073	8.26e-46	1.14e-44
DNAAF9	DNAAF9	1484.78	-1.27162	0.0610163	-20.8407	1.85e-96	1.19e-94
DNAH10OS	DNAH10OS	264.957	1.00931	0.117442	8.59409	8.39e-18	3.51e-17
DNAH11	DNAH11	144.311	1.77076	0.223308	7.92965	2.2e-15	8.06e-15
DNAH14	DNAH14	739.741	1.55276	0.0776635	19.9934	6.28e-89	3.29e-87
DNAH17-AS1	DNAH17-AS1	10.849	2.81476	0.276591	10.1766	2.52e-24	1.45e-23
DNAH3	DNAH3	61.1259	1.42582	0.210968	6.75847	1.39e-11	4.12e-11
DNAH6	DNAH6	126.555	-1.10395	0.138493	-7.97113	1.57e-15	5.81e-15
DNAH8	DNAH8	17.9674	1.78554	0.198653	8.9882	2.51e-19	1.13e-18
DNAH9	DNAH9	62.1521	-1.67685	0.19558	-8.5737	1e-17	4.17e-17
DNAI1	DNAI1	124.943	1.3672	0.182118	7.50724	6.04e-14	2.05e-13
DNAJB13	DNAJB13	21.6082	1.06882	0.148283	7.20797	5.68e-13	1.82e-12
DNAJB4	DNAJB4	1291.32	-1.46509	0.0729013	-20.0969	7.85e-90	4.22e-88
DNAJC1	DNAJC1	5420.84	1.50656	0.10846	13.8904	7.24e-44	9.31e-43
DNAJC12	DNAJC12	2614.76	2.13884	0.185202	11.5486	7.5e-31	5.79e-30
DNAJC18	DNAJC18	525.236	-1.05734	0.0579441	-18.2475	2.17e-74	7.53e-73
DNAJC22	DNAJC22	1045.85	1.52113	0.155413	9.78766	1.27e-22	6.75e-22
DNAJC5B	DNAJC5B	65.6907	1.1614	0.154172	7.53311	4.95e-14	1.69e-13
DNASE1L2	DNASE1L2	89.2243	2.29645	0.142047	16.1668	8.65e-59	1.79e-57
DNASE1L3	DNASE1L3	110.342	-2.79813	0.167941	-16.6614	2.5e-62	5.87e-61
DNM1P46	DNM1P46	13.3719	-1.57203	0.142571	-11.0263	2.85e-28	1.96e-27
DNM1P47	DNM1P47	6.43276	-2.20349	0.156545	-14.0757	5.36e-45	7.19e-44
DNM1P51	DNM1P51	11.9608	-1.48593	0.145867	-10.1869	2.27e-24	1.31e-23
DNM3-IT1	DNM3-IT1	1.41866	1.24996	0.23049	5.42306	5.86e-08	1.36e-07
DNMT3B	DNMT3B	548.59	1.47268	0.112431	13.0986	3.36e-39	3.58e-38
DNPEP-AS1	DNPEP-AS1	29.1617	1.29187	0.110734	11.6665	1.89e-31	1.5e-30
DNPH1	DNPH1	1425.42	1.01672	0.105075	9.67611	3.81e-22	1.98e-21
DOC2A	DOC2A	264.755	1.55468	0.167475	9.28307	1.65e-20	7.88e-20
DOC2B	DOC2B	861.631	-1.35459	0.144299	-9.38741	6.15e-21	3.01e-20
DOCK11	DOCK11	1551.16	-2.4505	0.107663	-22.7609	1.12e-114	1.17e-112
DOK7	DOK7	582.082	2.26941	0.202395	11.2128	3.53e-29	2.53e-28
DONSON	DONSON	1039.87	1.427	0.0814695	17.5157	1.09e-68	3.14e-67
DOP1B	DOP1B	4878.87	1.18893	0.0822638	14.4526	2.41e-47	3.47e-46
DPCD	DPCD	1152.74	1.05373	0.075699	13.92	4.79e-44	6.2e-43
DPEP1	DPEP1	91.1176	2.40079	0.15274	15.7182	1.13e-55	2.14e-54
DPF1	DPF1	47.8682	1.27983	0.125191	10.223	1.56e-24	9.08e-24
DPM2	DPM2	3380.02	1.05932	0.0629728	16.8218	1.69e-63	4.13e-62
DPP10	DPP10	47.0495	1.74071	0.375826	4.6317	3.63e-06	7.29e-06
DPP3	DPP3	3909.68	1.47591	0.0737473	20.013	4.24e-89	2.23e-87
DPP4	DPP4	747.279	-1.5622	0.13383	-11.673	1.75e-31	1.39e-30
DPP4-DT	DPP4-DT	3.03777	-1.59071	0.186325	-8.53729	1.37e-17	5.69e-17
DPP6	DPP6	49.1545	-2.73005	0.240032	-11.3737	5.65e-30	4.19e-29
DPT	DPT	4325.45	-3.56927	0.156108	-22.8642	1.06e-115	1.13e-113
DPY19L2	DPY19L2	132.135	-1.31775	0.142996	-9.21527	3.1e-20	1.47e-19
DPY19L2P1	DPY19L2P1	44.2025	3.12417	0.255012	12.2511	1.66e-34	1.49e-33
DPY19L2P4	DPY19L2P4	102.17	1.02641	0.276443	3.71291	0.000204889	0.000352604
DPYD	DPYD	1709.24	-1.23881	0.0962405	-12.872	6.47e-38	6.54e-37
DPYD-AS1	DPYD-AS1	1.58311	-2.37733	0.180336	-13.1828	1.1e-39	1.2e-38
DPYS	DPYS	11.141	-1.51366	0.178723	-8.46931	2.47e-17	1.01e-16
DPYSL2	DPYSL2	5898.77	-1.38552	0.0826143	-16.7709	3.98e-63	9.61e-62
DPYSL5	DPYSL5	62.4599	3.82354	0.368813	10.3671	3.5e-25	2.09e-24
DQX1	DQX1	132.048	4.0559	0.207906	19.5083	9.32e-85	4.31e-83
DRAIC	DRAIC	346.805	1.4366	0.197361	7.27903	3.36e-13	1.09e-12
DRAP1	DRAP1	4524.3	1.05229	0.0890589	11.8156	3.24e-32	2.64e-31
DRAXIN	DRAXIN	125.965	1.44464	0.158459	9.11679	7.74e-20	3.58e-19
DRC7	DRC7	15.9807	2.25591	0.230473	9.78816	1.27e-22	6.72e-22
DRD2	DRD2	98.7122	-1.4995	0.232157	-6.45897	1.05e-10	2.95e-10
DRD4	DRD4	49.2402	1.40076	0.138558	10.1096	5.01e-24	2.84e-23
DRP2	DRP2	65.9842	2.03837	0.125409	16.2538	2.1e-59	4.42e-58
DSC1	DSC1	42.9412	-2.58117	0.180646	-14.2885	2.58e-46	3.6e-45
DSCAM-AS1	DSCAM-AS1	900.139	7.30171	0.392621	18.5973	3.38e-77	1.28e-75
DSCAS	DSCAS	4.17947	-1.16764	0.142304	-8.20527	2.3e-16	8.9e-16
DSCC1	DSCC1	658.295	1.52759	0.110002	13.887	7.6e-44	9.76e-43
DSCR9	DSCR9	9.54601	1.04966	0.131781	7.96519	1.65e-15	6.09e-15
DSEL	DSEL	660.656	-1.07356	0.135248	-7.9377	2.06e-15	7.57e-15
DSG4	DSG4	3.42795	-1.81199	0.227096	-7.97896	1.48e-15	5.46e-15
DSN1	DSN1	1665.66	1.13808	0.070072	16.2416	2.56e-59	5.37e-58
DSP-AS1	DSP-AS1	128.923	1.33392	0.121468	10.9816	4.68e-28	3.18e-27
DST	DST	15433.7	-2.4199	0.106839	-22.6501	1.39e-113	1.42e-111
DTL	DTL	1751.01	3.06869	0.109234	28.0927	1.2e-173	5.74e-171
DTX1	DTX1	478.272	-2.53079	0.11877	-21.3084	9.49e-101	6.81e-99
DTYMK	DTYMK	1659.59	1.07743	0.0695798	15.4848	4.4e-54	7.94e-53
DUSP1	DUSP1	11546	-1.98266	0.130778	-15.1604	6.47e-52	1.09e-50
DUSP13	DUSP13	39.3351	3.57216	0.261848	13.6421	2.25e-42	2.74e-41
DUSP15	DUSP15	221.027	1.1949	0.170483	7.00892	2.4e-12	7.4e-12
DUSP5P1	DUSP5P1	14.309	1.02305	0.2554	4.00566	6.18e-05	0.000111471
DUSP6	DUSP6	3994.64	-1.38703	0.106334	-13.044	6.87e-39	7.26e-38
DUX4L27	DUX4L27	10.3678	-1.11995	0.164756	-6.79763	1.06e-11	3.16e-11
DUX4L50	DUX4L50	236.297	1.15358	0.180185	6.4022	1.53e-10	4.24e-10
DYDC1	DYDC1	4.6088	3.3614	0.346311	9.70632	2.83e-22	1.48e-21
DYDC2	DYDC2	65.6655	2.23241	0.195674	11.4088	3.78e-30	2.82e-29
DYNC2I2	DYNC2I2	5427.8	1.57518	0.0797145	19.7603	6.54e-87	3.22e-85
DYNLL1P4	DYNLL1P4	1.95132	-1.3385	0.164325	-8.14546	3.78e-16	1.45e-15
DYNLT2B	DYNLT2B	333.171	1.26561	0.0803554	15.7502	6.85e-56	1.3e-54
DYRK3-AS1	DYRK3-AS1	7.73315	1.26279	0.145632	8.6711	4.28e-18	1.82e-17
DZIP1L	DZIP1L	224.71	-1.00488	0.0963962	-10.4244	1.92e-25	1.16e-24
E2F1	E2F1	1342.71	2.58537	0.115147	22.4528	1.2e-111	1.13e-109
E2F2	E2F2	628.902	2.54238	0.13095	19.4149	5.78e-84	2.61e-82
E2F5	E2F5	932.783	1.22513	0.0901391	13.5915	4.5e-42	5.42e-41
E2F7	E2F7	321.928	2.89308	0.135048	21.4225	8.24e-102	6.05e-100
E2F8	E2F8	379.502	3.29362	0.140157	23.4995	4.12e-122	5.06e-120
EBF1	EBF1	1117.09	-3.15423	0.109389	-28.835	7.81e-183	4.87e-180
EBF2	EBF2	304.816	-2.35985	0.118533	-19.9089	3.41e-88	1.75e-86
EBF3	EBF3	373.944	-2.84082	0.119856	-23.7019	3.44e-124	4.46e-122
EBP	EBP	2580.78	1.13969	0.082606	13.7967	2.67e-43	3.36e-42
ECE2	ECE2	791.514	1.94406	0.107151	18.1433	1.45e-73	4.88e-72
ECHDC1	ECHDC1	2440.41	-1.16139	0.089618	-12.9593	2.08e-38	2.15e-37
ECHDC3	ECHDC3	1317.09	-1.50009	0.0997874	-15.0329	4.47e-51	7.3e-50
ECM1	ECM1	7995.92	1.69675	0.179573	9.4488	3.43e-21	1.69e-20
ECM2	ECM2	1937.88	-2.67527	0.120562	-22.19	4.29e-109	3.79e-107
ECMXP	ECMXP	1.94802	2.15377	0.290765	7.40724	1.29e-13	4.29e-13
ECRG4	ECRG4	389.825	-2.90074	0.234171	-12.3873	3.06e-35	2.83e-34
ECSCR	ECSCR	229.495	-1.71018	0.0988957	-17.2927	5.34e-67	1.46e-65
ECT2	ECT2	3353.8	1.91691	0.0896672	21.3781	2.14e-101	1.54e-99
EDA	EDA	203.871	-1.37781	0.103836	-13.2691	3.5e-40	3.9e-39
EDAR	EDAR	34.217	-1.60895	0.260283	-6.18155	6.35e-10	1.69e-09
EDDM13	EDDM13	25.8625	-1.62254	0.114144	-14.2149	7.41e-46	1.02e-44
EDDM3B	EDDM3B	10.8983	1.48389	0.322014	4.60815	4.06e-06	8.12e-06
EDN1	EDN1	845.561	-1.35848	0.144827	-9.37999	6.6e-21	3.22e-20
EDN2	EDN2	434.997	2.53155	0.178994	14.1432	2.06e-45	2.8e-44
EDN3	EDN3	175.577	-2.66209	0.316411	-8.41338	3.98e-17	1.61e-16
EDNRB	EDNRB	832.532	-2.20754	0.116276	-18.9853	2.26e-80	9.33e-79
EEF1A1P18	EEF1A1P18	1.36117	-1.243	0.152165	-8.16878	3.12e-16	1.2e-15
EEF1A2	EEF1A2	6134.43	3.44916	0.225978	15.2632	1.34e-52	2.32e-51
EEF1DP1	EEF1DP1	77.4223	1.05038	0.112859	9.30699	1.32e-20	6.33e-20
EEIG1	EEIG1	11908.4	1.11105	0.0715598	15.5262	2.31e-54	4.2e-53
EEPD1	EEPD1	780.347	-1.79589	0.0810805	-22.1495	1.06e-108	9.21e-107
EFCAB13-DT	EFCAB13-DT	14.7521	-1.07838	0.12092	-8.91814	4.74e-19	2.11e-18
EFEMP1	EFEMP1	7611.93	-1.92522	0.141729	-13.5838	5e-42	6e-41
EFL1P1	EFL1P1	1.8859	1.34447	0.278689	4.82428	1.41e-06	2.92e-06
EFNA1	EFNA1	7914.78	1.09054	0.0827416	13.18	1.14e-39	1.25e-38
EFNA2	EFNA2	6.81104	3.48981	0.329668	10.5858	3.47e-26	2.17e-25
EFNA3	EFNA3	982.955	1.88938	0.137492	13.7418	5.7e-43	7.12e-42
EFNA4	EFNA4	1434.48	1.2903	0.0999858	12.9048	4.23e-38	4.31e-37
EFNB1	EFNB1	1787.22	-1.00369	0.0853983	-11.753	6.81e-32	5.48e-31
EFNB3	EFNB3	423.075	-1.19728	0.143307	-8.35466	6.56e-17	2.62e-16
EFR3B	EFR3B	625.958	1.22922	0.136056	9.03468	1.64e-19	7.49e-19
EGF	EGF	698.847	-1.42374	0.184516	-7.7161	1.2e-14	4.23e-14
EGFEM1P	EGFEM1P	4.5815	-3.7012	0.17239	-21.4698	2.98e-102	2.22e-100
EGFL6	EGFL6	435.664	-2.11771	0.178116	-11.8895	1.34e-32	1.11e-31
EGFLAM	EGFLAM	785.908	-1.80966	0.0923126	-19.6036	1.44e-85	6.84e-84
EGFR	EGFR	4248.28	-1.91834	0.178355	-10.7557	5.57e-27	3.61e-26
EGFR-AS1	EGFR-AS1	3.51301	-1.44848	0.279179	-5.18837	2.12e-07	4.71e-07
EGLN3	EGLN3	2766.02	1.64926	0.145749	11.3158	1.1e-29	8.02e-29
EGR1	EGR1	20976.4	-2.60695	0.150412	-17.332	2.7e-67	7.45e-66
EGR2	EGR2	1630.64	-2.10426	0.137145	-15.3433	3.92e-53	6.92e-52
EGR3	EGR3	2212.08	-1.99912	0.168835	-11.8407	2.4e-32	1.97e-31
EGR4	EGR4	17.4312	1.49573	0.249474	5.99551	2.03e-09	5.2e-09
EHBP1	EHBP1	2646.9	-1.31852	0.063712	-20.695	3.85e-95	2.37e-93
EHD2	EHD2	7367.55	-2.01841	0.0910842	-22.1598	8.39e-109	7.34e-107
EHD4-AS1	EHD4-AS1	6.08535	-1.57938	0.121275	-13.0231	9.04e-39	9.51e-38
EHHADH	EHHADH	741.238	-1.10716	0.0888418	-12.4622	1.2e-35	1.13e-34
EHMT2-AS1	EHMT2-AS1	5.09383	1.33442	0.178576	7.47256	7.86e-14	2.65e-13
EIF1B-AS1	EIF1B-AS1	56.038	-1.21256	0.0735701	-16.4817	4.97e-61	1.1e-59
EIF3EP1	EIF3EP1	94.6117	-1.03933	0.0834186	-12.4592	1.25e-35	1.17e-34
EIF3L	EIF3L	9758.27	-1.05731	0.0674	-15.6871	1.85e-55	3.47e-54
EIF4A2P1	EIF4A2P1	4.9354	-1.26471	0.122605	-10.3153	6.01e-25	3.55e-24
EIF4E1B	EIF4E1B	16.3803	4.10008	0.401418	10.214	1.72e-24	9.95e-24
EIF4E3	EIF4E3	2474.54	-1.05369	0.0760506	-13.8551	1.18e-43	1.51e-42
EIF4EBP1	EIF4EBP1	3344.83	1.35317	0.131201	10.3137	6.11e-25	3.61e-24
EIF4EBP2	EIF4EBP2	12495.5	-1.07273	0.0564643	-18.9983	1.76e-80	7.3e-79
EIPR1-IT1	EIPR1-IT1	11.482	1.85796	0.169143	10.9845	4.54e-28	3.09e-27
ELANE	ELANE	8.93507	-2.49235	0.208507	-11.9533	6.24e-33	5.25e-32
ELAVL2	ELAVL2	194.493	2.57781	0.186264	13.8395	1.47e-43	1.88e-42
ELAVL3	ELAVL3	11.8777	2.61109	0.302785	8.62356	6.49e-18	2.73e-17
ELF3-AS1	ELF3-AS1	91.3459	1.36238	0.0919042	14.8239	1.03e-49	1.61e-48
ELF5	ELF5	2523.96	-1.09622	0.270312	-4.05539	5.01e-05	9.1e-05
ELFN1-AS1	ELFN1-AS1	31.8146	3.66276	0.310671	11.7898	4.4e-32	3.57e-31
ELFN2	ELFN2	11.2072	1.8033	0.215984	8.34922	6.87e-17	2.74e-16
ELMOD3	ELMOD3	1540.47	-1.52139	0.0589322	-25.8159	5.88e-147	1.33e-144
ELOA2	ELOA2	1.77711	1.15622	0.276971	4.17451	2.99e-05	5.55e-05
ELOB	ELOB	8751.7	1.11376	0.0847589	13.1403	1.93e-39	2.09e-38
ELOVL2	ELOVL2	2481.26	1.73511	0.221838	7.82151	5.22e-15	1.88e-14
ELOVL2-AS1	ELOVL2-AS1	39.4301	1.00985	0.256096	3.94325	8.04e-05	0.000143484
ELOVL3	ELOVL3	61.83	-1.88514	0.177536	-10.6183	2.45e-26	1.55e-25
EMC9	EMC9	792.188	1.18053	0.0836524	14.1124	3.19e-45	4.31e-44
EMCN	EMCN	1224.56	-1.89694	0.104526	-18.148	1.33e-73	4.49e-72
EME1	EME1	312.057	2.60508	0.121602	21.4231	8.15e-102	6e-100
EME2	EME2	1052.23	1.45269	0.11052	13.144	1.84e-39	1.99e-38
EMID1	EMID1	697.274	1.16128	0.15374	7.55355	4.24e-14	1.45e-13
EMILIN2	EMILIN2	1108.63	-1.47242	0.104213	-14.129	2.52e-45	3.42e-44
EMILIN3	EMILIN3	114.621	-1.69069	0.246329	-6.86356	6.72e-12	2.02e-11
EML4-AS1	EML4-AS1	6.24264	1.46171	0.183342	7.97262	1.55e-15	5.74e-15
EML5	EML5	48.8022	-1.469	0.186474	-7.87778	3.33e-15	1.21e-14
EMP1	EMP1	12956.6	-1.87533	0.100049	-18.7442	2.16e-78	8.5e-77
EMSLR	EMSLR	128.113	1.57606	0.140789	11.1945	4.34e-29	3.09e-28
EMX1	EMX1	147.244	3.59655	0.252808	14.2264	6.28e-46	8.69e-45
EMX2	EMX2	83.9679	-1.5829	0.13279	-11.9203	9.28e-33	7.75e-32
EMX2OS	EMX2OS	167.541	-2.48166	0.137752	-18.0153	1.48e-72	4.79e-71
EN1	EN1	899.93	2.18627	0.243636	8.97353	2.87e-19	1.29e-18
EN2	EN2	44.2844	1.28401	0.275929	4.65343	3.26e-06	6.58e-06
ENAM	ENAM	7.65874	-2.55777	0.186512	-13.7137	8.41e-43	1.04e-41
ENDOU	ENDOU	28.1384	-1.06076	0.153206	-6.92376	4.4e-12	1.34e-11
ENHO	ENHO	332.778	1.27706	0.201452	6.33928	2.31e-10	6.31e-10
ENKUR	ENKUR	42.5597	1.62891	0.164383	9.90926	3.79e-23	2.06e-22
ENO2	ENO2	2866.14	1.55616	0.129979	11.9723	4.96e-33	4.19e-32
ENPP2	ENPP2	2776.89	-2.72656	0.133911	-20.3609	3.72e-92	2.14e-90
ENPP5	ENPP5	3374.18	1.34288	0.155057	8.66053	4.7e-18	1.99e-17
ENPP6	ENPP6	55.4037	-1.44246	0.147275	-9.79433	1.19e-22	6.33e-22
ENPP7	ENPP7	2.835	1.46609	0.228195	6.42474	1.32e-10	3.67e-10
ENPP7P11	ENPP7P11	21.1332	1.28787	0.241036	5.34306	9.14e-08	2.08e-07
ENPP7P2	ENPP7P2	3.01459	-1.71794	0.154803	-11.0976	1.29e-28	8.97e-28
ENPP7P8	ENPP7P8	2.85462	1.10561	0.229941	4.80825	1.52e-06	3.16e-06
ENSG00000093100	ENSG00000093100	9.18628	-1.56036	0.137714	-11.3304	9.27e-30	6.8e-29
ENSG00000145063	ENSG00000145063	40.0885	2.55817	0.224632	11.3883	4.78e-30	3.56e-29
ENSG00000151303	ENSG00000151303	12.1862	-2.31336	0.130979	-17.6621	8.21e-70	2.47e-68
ENSG00000166104	ENSG00000166104	4.66473	-1.08693	0.314708	-3.45377	0.00055281	0.000912166
ENSG00000170089	ENSG00000170089	491.328	1.05426	0.0964491	10.9308	8.22e-28	5.53e-27
ENSG00000177699	ENSG00000177699	11.6727	1.24502	0.165028	7.54431	4.55e-14	1.55e-13
ENSG00000179066	ENSG00000179066	75.9424	1.6086	0.2499	6.43699	1.22e-10	3.4e-10
ENSG00000183154	ENSG00000183154	23.9546	-2.09036	0.127967	-16.3352	5.55e-60	1.19e-58
ENSG00000186148	ENSG00000186148	1.52919	-1.19075	0.183614	-6.48509	8.87e-11	2.49e-10
ENSG00000187185	ENSG00000187185	10.136	-1.21038	0.234174	-5.16873	2.36e-07	5.21e-07
ENSG00000187951	ENSG00000187951	310.307	1.56241	0.0994688	15.7075	1.34e-55	2.53e-54
ENSG00000188525	ENSG00000188525	12.4875	-3.47269	0.26927	-12.8967	4.7e-38	4.78e-37
ENSG00000197320	ENSG00000197320	7.21709	-1.52346	0.250648	-6.07809	1.22e-09	3.17e-09
ENSG00000197376	ENSG00000197376	1.34446	-1.06727	0.234046	-4.56008	5.11e-06	1.01e-05
ENSG00000197670	ENSG00000197670	98.5449	1.27667	0.12128	10.5267	6.51e-26	4.03e-25
ENSG00000197815	ENSG00000197815	47.3116	-1.07475	0.120799	-8.897	5.74e-19	2.54e-18
ENSG00000200385	ENSG00000200385	17.6127	1.54193	0.196525	7.84598	4.3e-15	1.55e-14
ENSG00000203392	ENSG00000203392	42.3925	-1.25172	0.10491	-11.9313	8.13e-33	6.81e-32
ENSG00000203546	ENSG00000203546	40.3894	-1.10096	0.0843093	-13.0586	5.68e-39	6.02e-38
ENSG00000203635	ENSG00000203635	89.8702	1.36024	0.180119	7.5519	4.29e-14	1.47e-13
ENSG00000204049	ENSG00000204049	294.47	2.93033	0.240099	12.2047	2.93e-34	2.61e-33
ENSG00000205037	ENSG00000205037	9.07674	-1.84891	0.182269	-10.1438	3.53e-24	2.01e-23
ENSG00000205325	ENSG00000205325	13.9317	2.19912	0.371248	5.9236	3.15e-09	7.98e-09
ENSG00000205537	ENSG00000205537	2.76577	1.14042	0.17739	6.42891	1.29e-10	3.58e-10
ENSG00000205794	ENSG00000205794	10.8605	1.21021	0.165022	7.33362	2.24e-13	7.36e-13
ENSG00000206567	ENSG00000206567	343.65	-1.55297	0.0898923	-17.2759	7.14e-67	1.94e-65
ENSG00000206647	ENSG00000206647	2.42865	2.91557	0.290529	10.0354	1.07e-23	5.94e-23
ENSG00000206878	ENSG00000206878	3.81742	1.46157	0.324162	4.50877	6.52e-06	1.28e-05
ENSG00000212206	ENSG00000212206	3.30059	-1.8212	0.153743	-11.8457	2.27e-32	1.86e-31
ENSG00000212293	ENSG00000212293	4.68638	-1.21988	0.133178	-9.15978	5.2e-20	2.42e-19
ENSG00000213028	ENSG00000213028	3.3396	1.54425	0.189718	8.13971	3.96e-16	1.52e-15
ENSG00000213060	ENSG00000213060	2.95801	1.54911	0.201114	7.70262	1.33e-14	4.69e-14
ENSG00000213279	ENSG00000213279	7.06553	-1.13547	0.137571	-8.25367	1.54e-16	6e-16
ENSG00000213328	ENSG00000213328	1.38871	-1.20313	0.166436	-7.2288	4.87e-13	1.57e-12
ENSG00000213561	ENSG00000213561	2.6671	-2.46801	0.171235	-14.413	4.29e-47	6.13e-46
ENSG00000213683	ENSG00000213683	3.2025	1.13731	0.163648	6.94973	3.66e-12	1.12e-11
ENSG00000213777	ENSG00000213777	5.91114	-2.24549	0.139199	-16.1316	1.53e-58	3.14e-57
ENSG00000213791	ENSG00000213791	5.32786	-3.90267	0.155624	-25.0776	8.73e-139	1.51e-136
ENSG00000213963	ENSG00000213963	84.4837	-1.03132	0.0886873	-11.6287	2.94e-31	2.31e-30
ENSG00000213994	ENSG00000213994	3.94772	-1.70933	0.144243	-11.8504	2.14e-32	1.76e-31
ENSG00000214559	ENSG00000214559	4.30053	1.42818	0.169239	8.43882	3.21e-17	1.3e-16
ENSG00000214797	ENSG00000214797	6.39677	1.63047	0.293692	5.55165	2.83e-08	6.7e-08
ENSG00000214803	ENSG00000214803	2.98937	1.05759	0.186608	5.66743	1.45e-08	3.5e-08
ENSG00000214919	ENSG00000214919	2.70342	1.74408	0.286725	6.08278	1.18e-09	3.08e-09
ENSG00000215023	ENSG00000215023	8.35745	3.54845	0.274258	12.9384	2.73e-38	2.82e-37
ENSG00000215237	ENSG00000215237	19.1859	-1.46564	0.131398	-11.1542	6.83e-29	4.82e-28
ENSG00000215304	ENSG00000215304	1.61426	-1.63836	0.16286	-10.0599	8.31e-24	4.66e-23
ENSG00000217275	ENSG00000217275	85.0614	3.39774	0.208099	16.3275	6.29e-60	1.34e-58
ENSG00000217702	ENSG00000217702	21.8003	1.68101	0.193249	8.69866	3.36e-18	1.43e-17
ENSG00000217801	ENSG00000217801	212.474	1.41444	0.121179	11.6723	1.77e-31	1.4e-30
ENSG00000219487	ENSG00000219487	1.16175	1.1041	0.241343	4.57483	4.77e-06	9.47e-06
ENSG00000220105	ENSG00000220105	1.10315	-1.00692	0.173648	-5.7986	6.69e-09	1.66e-08
ENSG00000220154	ENSG00000220154	2.88749	1.02028	0.311881	3.27137	0.00107027	0.00171687
ENSG00000220660	ENSG00000220660	1.5271	1.38701	0.266969	5.19538	2.04e-07	4.54e-07
ENSG00000220695	ENSG00000220695	1.49404	1.18359	0.258924	4.57119	4.85e-06	9.63e-06
ENSG00000222017	ENSG00000222017	3.49413	1.59589	0.257141	6.2063	5.42e-10	1.45e-09
ENSG00000222022	ENSG00000222022	10.0955	3.50511	0.2238	15.6618	2.76e-55	5.14e-54
ENSG00000222032	ENSG00000222032	17.9299	3.34082	0.203323	16.4311	1.15e-60	2.51e-59
ENSG00000222044	ENSG00000222044	4.32198	-1.28313	0.27355	-4.69067	2.72e-06	5.52e-06
ENSG00000223523	ENSG00000223523	7.33832	2.38176	0.37879	6.28782	3.22e-10	8.72e-10
ENSG00000223559	ENSG00000223559	11.3661	1.68137	0.15435	10.8932	1.24e-27	8.28e-27
ENSG00000223599	ENSG00000223599	7.42089	1.30204	0.157435	8.27033	1.34e-16	5.24e-16
ENSG00000223754	ENSG00000223754	1.10887	-1.64927	0.177258	-9.30433	1.35e-20	6.48e-20
ENSG00000223808	ENSG00000223808	505.452	6.65515	0.329123	20.2209	6.41e-91	3.56e-89
ENSG00000224090	ENSG00000224090	11.7715	1.70436	0.238894	7.13438	9.72e-13	3.08e-12
ENSG00000224239	ENSG00000224239	4.74925	-2.01419	0.275673	-7.30642	2.74e-13	8.96e-13
ENSG00000224251	ENSG00000224251	4.88388	-1.87017	0.231593	-8.07524	6.73e-16	2.55e-15
ENSG00000224260	ENSG00000224260	16.3572	3.24448	0.347458	9.33774	9.84e-21	4.76e-20
ENSG00000224272	ENSG00000224272	84.7421	4.11072	0.237561	17.3038	4.4e-67	1.21e-65
ENSG00000224374	ENSG00000224374	4.27806	1.9908	0.280069	7.10824	1.18e-12	3.7e-12
ENSG00000224525	ENSG00000224525	11.6419	-4.68287	0.274597	-17.0536	3.29e-65	8.44e-64
ENSG00000224621	ENSG00000224621	2.83337	-1.54495	0.15141	-10.2037	1.91e-24	1.1e-23
ENSG00000224675	ENSG00000224675	6.57596	2.02374	0.357466	5.66134	1.5e-08	3.63e-08
ENSG00000224713	ENSG00000224713	25.3299	-1.4103	0.110944	-12.7119	5.08e-37	4.97e-36
ENSG00000224715	ENSG00000224715	14.19	3.94395	0.347032	11.3648	6.26e-30	4.63e-29
ENSG00000224746	ENSG00000224746	24.6278	1.56321	0.159732	9.78641	1.29e-22	6.83e-22
ENSG00000225007	ENSG00000225007	2.51516	2.50529	0.255413	9.8088	1.03e-22	5.5e-22
ENSG00000225028	ENSG00000225028	5.12135	-1.50101	0.176205	-8.51855	1.62e-17	6.66e-17
ENSG00000225032	ENSG00000225032	105.167	-1.02869	0.0990732	-10.3832	2.96e-25	1.77e-24
ENSG00000225057	ENSG00000225057	7.36534	-1.42552	0.121012	-11.78	4.95e-32	4e-31
ENSG00000225106	ENSG00000225106	6.72854	1.29156	0.225936	5.71648	1.09e-08	2.65e-08
ENSG00000225107	ENSG00000225107	8.67808	3.63845	0.358624	10.1456	3.47e-24	1.98e-23
ENSG00000225111	ENSG00000225111	1.76636	-1.14047	0.146562	-7.78148	7.17e-15	2.56e-14
ENSG00000225166	ENSG00000225166	2.23347	3.49719	0.264384	13.2277	6.07e-40	6.7e-39
ENSG00000225173	ENSG00000225173	6.57265	1.37803	0.194045	7.10158	1.23e-12	3.87e-12
ENSG00000225208	ENSG00000225208	25.9636	2.71051	0.27865	9.72731	2.31e-22	1.21e-21
ENSG00000225216	ENSG00000225216	3.03831	-1.35895	0.176329	-7.70691	1.29e-14	4.54e-14
ENSG00000225243	ENSG00000225243	6.41947	-1.28525	0.278426	-4.61613	3.91e-06	7.83e-06
ENSG00000225356	ENSG00000225356	6.03356	1.32787	0.156037	8.50993	1.74e-17	7.17e-17
ENSG00000225385	ENSG00000225385	10.2103	1.80076	0.174841	10.2994	7.09e-25	4.17e-24
ENSG00000225399	ENSG00000225399	14.8819	-1.90645	0.113489	-16.7986	2.5e-63	6.08e-62
ENSG00000225417	ENSG00000225417	1.83236	1.58622	0.289134	5.4861	4.11e-08	9.61e-08
ENSG00000225420	ENSG00000225420	2.31458	1.11061	0.201818	5.503	3.73e-08	8.76e-08
ENSG00000225489	ENSG00000225489	173.414	1.1898	0.148234	8.02648	1e-15	3.75e-15
ENSG00000225532	ENSG00000225532	2.32881	1.94973	0.277674	7.02167	2.19e-12	6.77e-12
ENSG00000225649	ENSG00000225649	16.8567	-1.46695	0.150329	-9.75827	1.7e-22	8.97e-22
ENSG00000225840	ENSG00000225840	28.386	1.09487	0.273004	4.01046	6.06e-05	0.000109313
ENSG00000225864	ENSG00000225864	8.00334	1.04995	0.195204	5.37875	7.5e-08	1.72e-07
ENSG00000225886	ENSG00000225886	29.2947	1.37611	0.193287	7.11951	1.08e-12	3.42e-12
ENSG00000225889	ENSG00000225889	56.245	-1.82461	0.137747	-13.2461	4.75e-40	5.27e-39
ENSG00000225929	ENSG00000225929	2.06415	-1.47196	0.216083	-6.81199	9.63e-12	2.87e-11
ENSG00000225956	ENSG00000225956	2.19331	-1.17789	0.154903	-7.60404	2.87e-14	9.91e-14
ENSG00000226012	ENSG00000226012	7.4441	4.41209	0.275506	16.0145	1.01e-57	2.04e-56
ENSG00000226025	ENSG00000226025	73.0515	3.59133	0.237043	15.1506	7.51e-52	1.26e-50
ENSG00000226087	ENSG00000226087	13.4504	2.25436	0.25447	8.85902	8.07e-19	3.56e-18
ENSG00000226197	ENSG00000226197	46.3427	-1.54764	0.192974	-8.01993	1.06e-15	3.95e-15
ENSG00000226239	ENSG00000226239	8.44797	-1.67834	0.12123	-13.8442	1.38e-43	1.76e-42
ENSG00000226252	ENSG00000226252	10.2944	-2.31204	0.133576	-17.3088	4.04e-67	1.11e-65
ENSG00000226329	ENSG00000226329	44.0974	-2.07025	0.162753	-12.7202	4.57e-37	4.47e-36
ENSG00000226409	ENSG00000226409	5.0175	-1.91656	0.257126	-7.45376	9.07e-14	3.05e-13
ENSG00000226423	ENSG00000226423	2.38124	1.77004	0.307099	5.76374	8.23e-09	2.02e-08
ENSG00000226530	ENSG00000226530	3.13338	-1.86478	0.19915	-9.36367	7.7e-21	3.75e-20
ENSG00000226535	ENSG00000226535	1.48624	2.03415	0.289233	7.03293	2.02e-12	6.26e-12
ENSG00000226644	ENSG00000226644	18.1048	1.36336	0.185782	7.3385	2.16e-13	7.1e-13
ENSG00000226690	ENSG00000226690	4.18709	1.68583	0.280683	6.00617	1.9e-09	4.88e-09
ENSG00000226699	ENSG00000226699	1.54426	-1.36529	0.190972	-7.14914	8.73e-13	2.77e-12
ENSG00000226798	ENSG00000226798	2.19165	1.36038	0.306358	4.44048	8.98e-06	1.74e-05
ENSG00000226849	ENSG00000226849	16.0165	-1.89299	0.0969412	-19.5272	6.45e-85	3e-83
ENSG00000226871	ENSG00000226871	3.22559	-2.86483	0.174897	-16.3801	2.65e-60	5.77e-59
ENSG00000226957	ENSG00000226957	6.35541	1.34642	0.148291	9.07952	1.09e-19	5.01e-19
ENSG00000227045	ENSG00000227045	2.06161	1.54602	0.243994	6.33629	2.35e-10	6.43e-10
ENSG00000227066	ENSG00000227066	24.7884	2.41749	0.235668	10.258	1.09e-24	6.36e-24
ENSG00000227158	ENSG00000227158	3.05168	-1.89931	0.147128	-12.9092	4e-38	4.08e-37
ENSG00000227218	ENSG00000227218	97.4478	1.43395	0.136438	10.5099	7.78e-26	4.79e-25
ENSG00000227374	ENSG00000227374	3.48778	-1.02667	0.130848	-7.84626	4.29e-15	1.55e-14
ENSG00000227413	ENSG00000227413	2.04398	-1.15453	0.168256	-6.86173	6.8e-12	2.04e-11
ENSG00000227579	ENSG00000227579	6.67463	3.13131	0.325908	9.60797	7.4e-22	3.79e-21
ENSG00000227619	ENSG00000227619	26.9312	1.2759	0.161301	7.91005	2.57e-15	9.4e-15
ENSG00000227711	ENSG00000227711	4.44038	1.06631	0.197121	5.40941	6.32e-08	1.46e-07
ENSG00000227857	ENSG00000227857	17.6079	2.22568	0.153424	14.5067	1.1e-47	1.6e-46
ENSG00000227934	ENSG00000227934	2.14878	-1.05469	0.168829	-6.24708	4.18e-10	1.12e-09
ENSG00000228044	ENSG00000228044	24.5513	2.75901	0.289674	9.52454	1.66e-21	8.34e-21
ENSG00000228079	ENSG00000228079	2.25534	-1.11406	0.162746	-6.84537	7.63e-12	2.28e-11
ENSG00000228133	ENSG00000228133	10.2484	1.12738	0.204401	5.51552	3.48e-08	8.18e-08
ENSG00000228142	ENSG00000228142	2.22623	-1.34556	0.237983	-5.65402	1.57e-08	3.78e-08
ENSG00000228162	ENSG00000228162	12.2018	-3.87806	0.35623	-10.8864	1.34e-27	8.92e-27
ENSG00000228201	ENSG00000228201	16.3322	1.07286	0.134615	7.96987	1.59e-15	5.87e-15
ENSG00000228216	ENSG00000228216	1.69409	1.66443	0.277606	5.99567	2.03e-09	5.2e-09
ENSG00000228318	ENSG00000228318	10.9154	1.31861	0.20384	6.46889	9.87e-11	2.77e-10
ENSG00000228330	ENSG00000228330	5.30451	-1.77042	0.11414	-15.511	2.92e-54	5.3e-53
ENSG00000228401	ENSG00000228401	11.8409	-1.6526	0.125877	-13.1287	2.25e-39	2.43e-38
ENSG00000228484	ENSG00000228484	7.759	-1.80189	0.171992	-10.4766	1.11e-25	6.76e-25
ENSG00000228510	ENSG00000228510	13.1442	1.26005	0.177226	7.10988	1.16e-12	3.65e-12
ENSG00000228559	ENSG00000228559	14.1349	2.94148	0.270447	10.8764	1.49e-27	9.92e-27
ENSG00000228561	ENSG00000228561	24.8976	2.8706	0.275242	10.4293	1.82e-25	1.1e-24
ENSG00000228613	ENSG00000228613	77.3001	1.43455	0.169697	8.45363	2.82e-17	1.15e-16
ENSG00000228626	ENSG00000228626	8.31907	3.41257	0.315316	10.8227	2.69e-27	1.77e-26
ENSG00000228692	ENSG00000228692	1.81275	-2.79838	0.150653	-18.575	5.12e-77	1.93e-75
ENSG00000228719	ENSG00000228719	8.97987	1.51619	0.17761	8.5366	1.38e-17	5.72e-17
ENSG00000228734	ENSG00000228734	2.05587	3.01178	0.294185	10.2377	1.34e-24	7.83e-24
ENSG00000228792	ENSG00000228792	2.5042	2.64426	0.281645	9.38864	6.08e-21	2.98e-20
ENSG00000228950	ENSG00000228950	6.83023	1.08982	0.181336	6.00993	1.86e-09	4.77e-09
ENSG00000228974	ENSG00000228974	3.64963	1.43063	0.191706	7.46262	8.48e-14	2.85e-13
ENSG00000229052	ENSG00000229052	2.95706	-2.13669	0.149781	-14.2654	3.59e-46	5e-45
ENSG00000229116	ENSG00000229116	14.834	-1.72794	0.163922	-10.5413	5.57e-26	3.46e-25
ENSG00000229151	ENSG00000229151	1.89824	-1.45978	0.204321	-7.14454	9.03e-13	2.86e-12
ENSG00000229167	ENSG00000229167	7.7871	-1.4665	0.188476	-7.7808	7.21e-15	2.57e-14
ENSG00000229178	ENSG00000229178	10.7981	1.51252	0.151567	9.97922	1.88e-23	1.04e-22
ENSG00000229262	ENSG00000229262	1.49742	1.09105	0.266879	4.08818	4.35e-05	7.95e-05
ENSG00000229263	ENSG00000229263	1.43207	-1.05254	0.179803	-5.85385	4.8e-09	1.2e-08
ENSG00000229278	ENSG00000229278	5.84238	1.30912	0.163017	8.03058	9.7e-16	3.63e-15
ENSG00000229436	ENSG00000229436	11.1073	-4.00212	0.255906	-15.639	3.95e-55	7.33e-54
ENSG00000229491	ENSG00000229491	2.86954	-1.96681	0.152123	-12.9291	3.09e-38	3.17e-37
ENSG00000229498	ENSG00000229498	1.51849	-2.68005	0.175819	-15.2432	1.83e-52	3.14e-51
ENSG00000229512	ENSG00000229512	17.5346	1.79014	0.163424	10.9539	6.36e-28	4.3e-27
ENSG00000229588	ENSG00000229588	4.04855	1.08132	0.250529	4.31617	1.59e-05	3.02e-05
ENSG00000229652	ENSG00000229652	2.36284	1.17043	0.199116	5.87812	4.15e-09	1.04e-08
ENSG00000229720	ENSG00000229720	4.91021	2.00527	0.193934	10.34	4.65e-25	2.76e-24
ENSG00000229771	ENSG00000229771	6.4798	-1.44857	0.177985	-8.13873	3.99e-16	1.53e-15
ENSG00000229808	ENSG00000229808	15.7528	1.07969	0.114493	9.4302	4.09e-21	2.02e-20
ENSG00000229827	ENSG00000229827	1.28995	-1.16469	0.175824	-6.62416	3.49e-11	1.01e-10
ENSG00000229836	ENSG00000229836	10.5613	1.92829	0.222428	8.66928	4.35e-18	1.85e-17
ENSG00000229896	ENSG00000229896	12.3413	1.33215	0.194427	6.8517	7.3e-12	2.19e-11
ENSG00000229912	ENSG00000229912	2.63337	1.14865	0.247302	4.64471	3.41e-06	6.86e-06
ENSG00000229970	ENSG00000229970	9.00491	2.63863	0.266682	9.89431	4.41e-23	2.39e-22
ENSG00000229983	ENSG00000229983	2.16643	1.52266	0.248017	6.13934	8.29e-10	2.18e-09
ENSG00000230107	ENSG00000230107	29.0662	2.38202	0.183064	13.0119	1.05e-38	1.1e-37
ENSG00000230118	ENSG00000230118	11.3089	1.60824	0.182544	8.81017	1.25e-18	5.46e-18
ENSG00000230147	ENSG00000230147	1.24299	-1.3474	0.175503	-7.67734	1.62e-14	5.69e-14
ENSG00000230303	ENSG00000230303	3.24326	-1.37896	0.140985	-9.78086	1.36e-22	7.21e-22
ENSG00000230333	ENSG00000230333	40.9082	-2.25747	0.135807	-16.6226	4.78e-62	1.11e-60
ENSG00000230387	ENSG00000230387	15.8231	1.01128	0.241214	4.19245	2.76e-05	5.14e-05
ENSG00000230433	ENSG00000230433	4.91911	1.62616	0.238828	6.8089	9.83e-12	2.93e-11
ENSG00000230435	ENSG00000230435	6.07577	-2.62941	0.176474	-14.8997	3.31e-50	5.27e-49
ENSG00000230454	ENSG00000230454	85.5116	1.04617	0.121439	8.61479	7.01e-18	2.94e-17
ENSG00000230498	ENSG00000230498	24.2443	1.1005	0.179527	6.13	8.79e-10	2.31e-09
ENSG00000230526	ENSG00000230526	3.80659	1.73689	0.20117	8.63396	5.93e-18	2.5e-17
ENSG00000230552	ENSG00000230552	24.4349	1.14621	0.197034	5.8173	5.98e-09	1.49e-08
ENSG00000230615	ENSG00000230615	105.942	1.29711	0.1658	7.82335	5.14e-15	1.85e-14
ENSG00000230628	ENSG00000230628	9.74437	2.21528	0.285399	7.76206	8.36e-15	2.97e-14
ENSG00000230650	ENSG00000230650	16.3011	1.39007	0.161984	8.58151	9.36e-18	3.9e-17
ENSG00000230699	ENSG00000230699	31.9469	2.19017	0.214348	10.2178	1.65e-24	9.57e-24
ENSG00000230735	ENSG00000230735	4.26663	-1.60587	0.142788	-11.2465	2.41e-29	1.74e-28
ENSG00000230747	ENSG00000230747	11.0948	-1.62642	0.139005	-11.7004	1.27e-31	1.01e-30
ENSG00000230928	ENSG00000230928	5.11325	-2.60268	0.255	-10.2066	1.85e-24	1.07e-23
ENSG00000230953	ENSG00000230953	30.7405	-1.59214	0.136873	-11.6322	2.83e-31	2.22e-30
ENSG00000231024	ENSG00000231024	2.56236	-1.64709	0.136807	-12.0395	2.2e-33	1.9e-32
ENSG00000231073	ENSG00000231073	6.64734	1.42431	0.145109	9.81544	9.66e-23	5.16e-22
ENSG00000231081	ENSG00000231081	4.38225	1.20641	0.188936	6.38529	1.71e-10	4.72e-10
ENSG00000231181	ENSG00000231181	9.50168	-1.15171	0.0990128	-11.6319	2.84e-31	2.23e-30
ENSG00000231252	ENSG00000231252	1.69017	-1.62658	0.237791	-6.84039	7.9e-12	2.36e-11
ENSG00000231324	ENSG00000231324	23.6001	4.33189	0.33189	13.0522	6.18e-39	6.53e-38
ENSG00000231482	ENSG00000231482	11.9975	1.85053	0.17007	10.881	1.42e-27	9.45e-27
ENSG00000231521	ENSG00000231521	2.27373	-1.27997	0.143073	-8.94626	3.68e-19	1.65e-18
ENSG00000231612	ENSG00000231612	3.75211	1.62088	0.205225	7.89803	2.83e-15	1.03e-14
ENSG00000231705	ENSG00000231705	6.33682	1.43531	0.199005	7.21243	5.5e-13	1.77e-12
ENSG00000231741	ENSG00000231741	3.84411	-1.18967	0.149907	-7.936	2.09e-15	7.67e-15
ENSG00000231868	ENSG00000231868	18.5073	2.04008	0.205883	9.90893	3.81e-23	2.07e-22
ENSG00000231881	ENSG00000231881	2.09855	1.096	0.253297	4.32695	1.51e-05	2.88e-05
ENSG00000231903	ENSG00000231903	1.9003	1.78405	0.2534	7.04046	1.92e-12	5.94e-12
ENSG00000231916	ENSG00000231916	1.95835	-1.87398	0.20684	-9.06004	1.3e-19	5.96e-19
ENSG00000232063	ENSG00000232063	14.7776	-1.31025	0.117324	-11.1678	5.86e-29	4.15e-28
ENSG00000232377	ENSG00000232377	1.13394	-1.99612	0.179651	-11.1111	1.11e-28	7.73e-28
ENSG00000232411	ENSG00000232411	3.87566	-1.09008	0.166714	-6.53863	6.21e-11	1.76e-10
ENSG00000232482	ENSG00000232482	1.76986	1.27552	0.238327	5.35197	8.7e-08	1.99e-07
ENSG00000232528	ENSG00000232528	11.8741	-2.91392	0.186821	-15.5973	7.59e-55	1.4e-53
ENSG00000232536	ENSG00000232536	6.996	1.3124	0.146585	8.95312	3.46e-19	1.55e-18
ENSG00000232638	ENSG00000232638	40.5042	2.18617	0.230551	9.48238	2.49e-21	1.24e-20
ENSG00000232692	ENSG00000232692	15.2775	-1.1287	0.175334	-6.43739	1.22e-10	3.39e-10
ENSG00000232721	ENSG00000232721	12.3322	-1.20117	0.242677	-4.94965	7.43e-07	1.58e-06
ENSG00000232821	ENSG00000232821	16.4457	-3.49716	0.169069	-20.6848	4.75e-95	2.92e-93
ENSG00000232934	ENSG00000232934	22.4898	-1.07183	0.0888392	-12.0648	1.62e-33	1.4e-32
ENSG00000232949	ENSG00000232949	2.08514	-1.26082	0.187345	-6.72991	1.7e-11	4.99e-11
ENSG00000233017	ENSG00000233017	10.435	1.86927	0.182948	10.2175	1.66e-24	9.6e-24
ENSG00000233028	ENSG00000233028	33.5937	1.56385	0.192423	8.12717	4.39e-16	1.68e-15
ENSG00000233029	ENSG00000233029	8.68229	1.13943	0.201183	5.66364	1.48e-08	3.58e-08
ENSG00000233030	ENSG00000233030	45.9019	2.01695	0.159133	12.6747	8.17e-37	7.97e-36
ENSG00000233178	ENSG00000233178	20.4592	-1.03076	0.0883494	-11.6669	1.88e-31	1.49e-30
ENSG00000233183	ENSG00000233183	12.7205	2.10756	0.202762	10.3943	2.63e-25	1.58e-24
ENSG00000233251	ENSG00000233251	118.438	-1.2803	0.193168	-6.6279	3.41e-11	9.82e-11
ENSG00000233332	ENSG00000233332	13.5547	-1.68675	0.269209	-6.26558	3.71e-10	1e-09
ENSG00000233411	ENSG00000233411	12.8431	-1.21199	0.151259	-8.01263	1.12e-15	4.18e-15
ENSG00000233461	ENSG00000233461	374.167	1.6426	0.115515	14.2198	6.91e-46	9.54e-45
ENSG00000233514	ENSG00000233514	2.93435	1.1753	0.170683	6.88583	5.75e-12	1.73e-11
ENSG00000233539	ENSG00000233539	4.70084	1.89924	0.32448	5.85318	4.82e-09	1.2e-08
ENSG00000233542	ENSG00000233542	13.8631	2.71441	0.147957	18.3459	3.56e-75	1.27e-73
ENSG00000233589	ENSG00000233589	5.0792	3.11258	0.248612	12.5198	5.81e-36	5.53e-35
ENSG00000233626	ENSG00000233626	6.81029	1.20201	0.13375	8.98699	2.54e-19	1.15e-18
ENSG00000233760	ENSG00000233760	26.7936	-1.82574	0.205089	-8.90215	5.48e-19	2.43e-18
ENSG00000233785	ENSG00000233785	4.77911	1.1558	0.200843	5.75476	8.68e-09	2.13e-08
ENSG00000233817	ENSG00000233817	3.17586	-1.79332	0.134061	-13.3769	8.25e-41	9.45e-40
ENSG00000233823	ENSG00000233823	36.446	2.71679	0.25644	10.5943	3.17e-26	1.99e-25
ENSG00000233862	ENSG00000233862	5.50147	-1.07318	0.122542	-8.75765	1.99e-18	8.61e-18
ENSG00000234055	ENSG00000234055	2.23686	1.54835	0.249348	6.20959	5.31e-10	1.42e-09
ENSG00000234115	ENSG00000234115	28.3263	3.41465	0.253826	13.4527	2.97e-41	3.46e-40
ENSG00000234175	ENSG00000234175	15.1753	-1.24553	0.0994815	-12.5202	5.79e-36	5.5e-35
ENSG00000234210	ENSG00000234210	4.0365	1.32998	0.244647	5.43634	5.44e-08	1.26e-07
ENSG00000234261	ENSG00000234261	34.5991	1.88998	0.135504	13.9477	3.25e-44	4.23e-43
ENSG00000234292	ENSG00000234292	3.10406	-2.40019	0.176755	-13.5792	5.32e-42	6.39e-41
ENSG00000234337	ENSG00000234337	10.5515	1.60805	0.153047	10.5069	8.03e-26	4.94e-25
ENSG00000234459	ENSG00000234459	10.8325	-1.04884	0.175338	-5.98183	2.21e-09	5.65e-09
ENSG00000234521	ENSG00000234521	1.84074	1.32793	0.273592	4.85367	1.21e-06	2.53e-06
ENSG00000234692	ENSG00000234692	3.81653	1.63096	0.313639	5.20012	1.99e-07	4.43e-07
ENSG00000234703	ENSG00000234703	9.66239	3.91688	0.310335	12.6215	1.61e-36	1.56e-35
ENSG00000234810	ENSG00000234810	7.98037	-2.66768	0.260768	-10.2301	1.45e-24	8.45e-24
ENSG00000234937	ENSG00000234937	5.6541	1.11846	0.140001	7.98893	1.36e-15	5.05e-15
ENSG00000234961	ENSG00000234961	11.3093	-2.02621	0.117471	-17.2487	1.14e-66	3.07e-65
ENSG00000234998	ENSG00000234998	3.18012	-1.08458	0.189705	-5.71721	1.08e-08	2.64e-08
ENSG00000235005	ENSG00000235005	2.24431	1.22709	0.282785	4.3393	1.43e-05	2.73e-05
ENSG00000235021	ENSG00000235021	5.14165	1.08989	0.215236	5.06371	4.11e-07	8.92e-07
ENSG00000235052	ENSG00000235052	7.47652	1.37082	0.168911	8.11564	4.83e-16	1.84e-15
ENSG00000235091	ENSG00000235091	12.0418	2.94301	0.235789	12.4815	9.42e-36	8.89e-35
ENSG00000235105	ENSG00000235105	8.57107	-1.00839	0.112818	-8.93826	3.95e-19	1.77e-18
ENSG00000235128	ENSG00000235128	1.56516	-2.16302	0.162156	-13.3391	1.37e-40	1.55e-39
ENSG00000235189	ENSG00000235189	1.25644	-1.2113	0.160242	-7.55918	4.06e-14	1.39e-13
ENSG00000235286	ENSG00000235286	2.26289	-1.41346	0.140325	-10.0728	7.29e-24	4.1e-23
ENSG00000235288	ENSG00000235288	2.48556	-1.08318	0.162289	-6.6744	2.48e-11	7.21e-11
ENSG00000235349	ENSG00000235349	5.59342	1.12617	0.286299	3.93355	8.37e-05	0.000149132
ENSG00000235563	ENSG00000235563	2.01193	-1.17144	0.198801	-5.89251	3.8e-09	9.58e-09
ENSG00000235574	ENSG00000235574	3.30316	1.20074	0.29486	4.07225	4.66e-05	8.49e-05
ENSG00000235713	ENSG00000235713	12.1216	1.77968	0.236533	7.52402	5.31e-14	1.81e-13
ENSG00000235721	ENSG00000235721	5.58335	2.20496	0.222216	9.92261	3.32e-23	1.81e-22
ENSG00000235782	ENSG00000235782	3.56416	-2.30502	0.194295	-11.8635	1.83e-32	1.51e-31
ENSG00000235840	ENSG00000235840	3.34813	-1.66842	0.249802	-6.67895	2.41e-11	7e-11
ENSG00000235902	ENSG00000235902	9.00571	1.01887	0.259785	3.92199	8.78e-05	0.000156218
ENSG00000235939	ENSG00000235939	10.099	1.39432	0.204371	6.82248	8.95e-12	2.67e-11
ENSG00000235978	ENSG00000235978	379.15	3.37146	0.229528	14.6887	7.62e-49	1.16e-47
ENSG00000236064	ENSG00000236064	4.54138	1.24882	0.239075	5.22355	1.76e-07	3.92e-07
ENSG00000236069	ENSG00000236069	12.2105	1.68082	0.302804	5.55086	2.84e-08	6.73e-08
ENSG00000236140	ENSG00000236140	2.78754	1.36626	0.213997	6.38446	1.72e-10	4.74e-10
ENSG00000236304	ENSG00000236304	23.7865	-1.9923	0.127838	-15.5846	9.26e-55	1.7e-53
ENSG00000236319	ENSG00000236319	2.70731	-3.58151	0.193832	-18.4774	3.14e-76	1.16e-74
ENSG00000236385	ENSG00000236385	6.89447	3.46212	0.29518	11.7288	9.07e-32	7.25e-31
ENSG00000236449	ENSG00000236449	26.1762	2.57052	0.277276	9.27061	1.85e-20	8.84e-20
ENSG00000236452	ENSG00000236452	11.0082	2.86931	0.353101	8.12602	4.44e-16	1.69e-15
ENSG00000236472	ENSG00000236472	1.11706	1.04786	0.242867	4.31453	1.6e-05	3.04e-05
ENSG00000236494	ENSG00000236494	2.29341	-1.05585	0.146813	-7.1918	6.39e-13	2.04e-12
ENSG00000236501	ENSG00000236501	4.18124	-1.32823	0.1497	-8.87266	7.14e-19	3.16e-18
ENSG00000236536	ENSG00000236536	2.30381	-1.84581	0.23867	-7.73372	1.04e-14	3.69e-14
ENSG00000236583	ENSG00000236583	1.78079	1.13155	0.236095	4.7928	1.64e-06	3.4e-06
ENSG00000236841	ENSG00000236841	29.9067	1.25956	0.123561	10.1939	2.11e-24	1.22e-23
ENSG00000236846	ENSG00000236846	5.1015	1.51965	0.204003	7.44915	9.39e-14	3.15e-13
ENSG00000236924	ENSG00000236924	15.4572	1.46179	0.246948	5.91942	3.23e-09	8.18e-09
ENSG00000236990	ENSG00000236990	1.52814	-1.05661	0.223483	-4.72789	2.27e-06	4.63e-06
ENSG00000236998	ENSG00000236998	2.13676	-1.66841	0.152103	-10.969	5.39e-28	3.65e-27
ENSG00000237070	ENSG00000237070	3.04197	-1.51693	0.260095	-5.83221	5.47e-09	1.36e-08
ENSG00000237101	ENSG00000237101	32.8324	1.22186	0.149916	8.15027	3.63e-16	1.39e-15
ENSG00000237161	ENSG00000237161	2.47932	-1.0854	0.197108	-5.50661	3.66e-08	8.59e-08
ENSG00000237176	ENSG00000237176	1.76611	-1.0639	0.158079	-6.7302	1.69e-11	4.98e-11
ENSG00000237224	ENSG00000237224	2.43032	1.18557	0.273597	4.33326	1.47e-05	2.8e-05
ENSG00000237234	ENSG00000237234	12.2277	-2.47927	0.132748	-18.6765	7.69e-78	2.99e-76
ENSG00000237324	ENSG00000237324	2.47064	-1.06382	0.155285	-6.85075	7.35e-12	2.2e-11
ENSG00000237347	ENSG00000237347	1.92203	1.36558	0.234255	5.82944	5.56e-09	1.38e-08
ENSG00000237419	ENSG00000237419	1.45083	-1.58075	0.207465	-7.61935	2.55e-14	8.82e-14
ENSG00000237461	ENSG00000237461	5.49992	-1.05525	0.123194	-8.56571	1.07e-17	4.46e-17
ENSG00000237525	ENSG00000237525	1.51457	1.74024	0.292671	5.94604	2.75e-09	6.99e-09
ENSG00000237531	ENSG00000237531	2.87574	-1.43545	0.216912	-6.61765	3.65e-11	1.05e-10
ENSG00000237555	ENSG00000237555	3.76665	2.64909	0.316778	8.3626	6.14e-17	2.45e-16
ENSG00000237588	ENSG00000237588	8.29462	1.63313	0.175475	9.30694	1.32e-20	6.33e-20
ENSG00000237813	ENSG00000237813	5.53818	-3.75963	0.182919	-20.5535	7.16e-94	4.33e-92
ENSG00000237861	ENSG00000237861	3.67354	1.27785	0.170707	7.48562	7.12e-14	2.41e-13
ENSG00000238110	ENSG00000238110	2.85172	1.06539	0.209977	5.07385	3.9e-07	8.48e-07
ENSG00000238117	ENSG00000238117	124.801	1.79631	0.287757	6.24245	4.31e-10	1.16e-09
ENSG00000238178	ENSG00000238178	414.511	1.39885	0.24953	5.60595	2.07e-08	4.95e-08
ENSG00000238258	ENSG00000238258	2.52821	-1.08957	0.13127	-8.30026	1.04e-16	4.1e-16
ENSG00000238358	ENSG00000238358	6.74101	1.45072	0.31973	4.53733	5.7e-06	1.13e-05
ENSG00000238934	ENSG00000238934	1.82212	1.16868	0.211167	5.53439	3.12e-08	7.37e-08
ENSG00000239300	ENSG00000239300	9.36612	-1.05644	0.0927644	-11.3884	4.78e-30	3.55e-29
ENSG00000239593	ENSG00000239593	2.70394	-1.72221	0.184282	-9.34548	9.15e-21	4.43e-20
ENSG00000239622	ENSG00000239622	4.43146	-1.4531	0.193441	-7.51186	5.83e-14	1.98e-13
ENSG00000239791	ENSG00000239791	2.75259	1.27296	0.185667	6.85616	7.07e-12	2.12e-11
ENSG00000240086	ENSG00000240086	16.0056	2.24724	0.343616	6.53998	6.15e-11	1.75e-10
ENSG00000240103	ENSG00000240103	3.8102	1.07371	0.295516	3.63335	0.000279766	0.000474992
ENSG00000240240	ENSG00000240240	4.75677	-1.34573	0.164292	-8.19108	2.59e-16	9.99e-16
ENSG00000240497	ENSG00000240497	1.66612	1.11861	0.274341	4.07743	4.55e-05	8.32e-05
ENSG00000240521	ENSG00000240521	69.7383	4.62367	0.47493	9.73548	2.13e-22	1.12e-21
ENSG00000240687	ENSG00000240687	2.39387	-1.38696	0.214539	-6.46482	1.01e-10	2.84e-10
ENSG00000241003	ENSG00000241003	2.85646	1.42095	0.20636	6.88579	5.75e-12	1.73e-11
ENSG00000241054	ENSG00000241054	1.37676	2.2154	0.281776	7.86227	3.77e-15	1.37e-14
ENSG00000241220	ENSG00000241220	1.95388	-1.98624	0.209462	-9.48257	2.48e-21	1.24e-20
ENSG00000241280	ENSG00000241280	11.9544	2.45887	0.332671	7.3913	1.45e-13	4.83e-13
ENSG00000241456	ENSG00000241456	1.30085	-1.21215	0.214348	-5.65507	1.56e-08	3.76e-08
ENSG00000241475	ENSG00000241475	10.9954	2.71661	0.32795	8.28361	1.2e-16	4.7e-16
ENSG00000241593	ENSG00000241593	1.57763	-2.07193	0.181058	-11.4435	2.54e-30	1.91e-29
ENSG00000241679	ENSG00000241679	3.45777	-1.44291	0.17757	-8.12587	4.44e-16	1.69e-15
ENSG00000242034	ENSG00000242034	1.4088	-1.18526	0.209239	-5.66463	1.47e-08	3.56e-08
ENSG00000242078	ENSG00000242078	9.37492	2.05959	0.153212	13.4428	3.4e-41	3.95e-40
ENSG00000242136	ENSG00000242136	16.7423	2.33719	0.271126	8.62033	6.68e-18	2.81e-17
ENSG00000242396	ENSG00000242396	16.5835	1.57732	0.117601	13.4125	5.11e-41	5.89e-40
ENSG00000242540	ENSG00000242540	6.67838	2.94677	0.316765	9.30272	1.37e-20	6.58e-20
ENSG00000242611	ENSG00000242611	6.82233	-2.05906	0.192518	-10.6954	1.07e-26	6.86e-26
ENSG00000242628	ENSG00000242628	1.88578	-1.36586	0.159512	-8.56276	1.1e-17	4.58e-17
ENSG00000242888	ENSG00000242888	2.05566	1.85032	0.294778	6.27698	3.45e-10	9.33e-10
ENSG00000243018	ENSG00000243018	2.16008	-1.88516	0.140958	-13.3739	8.59e-41	9.82e-40
ENSG00000243243	ENSG00000243243	9.00797	-2.65112	0.117711	-22.5222	2.52e-112	2.4e-110
ENSG00000243273	ENSG00000243273	2.55309	2.4406	0.302305	8.0733	6.84e-16	2.59e-15
ENSG00000243384	ENSG00000243384	7.37138	-1.45258	0.28086	-5.17189	2.32e-07	5.13e-07
ENSG00000243659	ENSG00000243659	5.69617	-1.01982	0.110526	-9.22692	2.79e-20	1.32e-19
ENSG00000243979	ENSG00000243979	1.95502	1.25132	0.206305	6.06537	1.32e-09	3.42e-09
ENSG00000244061	ENSG00000244061	1.3182	-1.34103	0.193754	-6.92129	4.48e-12	1.36e-11
ENSG00000244137	ENSG00000244137	12.565	1.78159	0.179037	9.95095	2.5e-23	1.37e-22
ENSG00000244176	ENSG00000244176	4.28122	1.85966	0.205908	9.03149	1.69e-19	7.71e-19
ENSG00000244345	ENSG00000244345	2.71775	2.35133	0.29864	7.87346	3.45e-15	1.25e-14
ENSG00000244676	ENSG00000244676	9.54831	1.40833	0.263853	5.33758	9.42e-08	2.15e-07
ENSG00000244791	ENSG00000244791	5.41731	1.45517	0.288298	5.04745	4.48e-07	9.69e-07
ENSG00000244953	ENSG00000244953	10.4121	-1.7003	0.159976	-10.6285	2.2e-26	1.39e-25
ENSG00000244998	ENSG00000244998	7.39698	1.13659	0.20105	5.65325	1.57e-08	3.79e-08
ENSG00000245025	ENSG00000245025	36.5748	-1.8608	0.0858851	-21.6662	4.28e-104	3.32e-102
ENSG00000246090	ENSG00000246090	82.0419	-1.81438	0.107527	-16.8736	7.03e-64	1.74e-62
ENSG00000246465	ENSG00000246465	84.222	2.52058	0.155372	16.2229	3.48e-59	7.26e-58
ENSG00000247011	ENSG00000247011	24.5943	1.24008	0.198426	6.24961	4.11e-10	1.11e-09
ENSG00000247311	ENSG00000247311	2.18959	1.01003	0.212307	4.75738	1.96e-06	4.03e-06
ENSG00000247416	ENSG00000247416	1.55711	-1.14987	0.252597	-4.55221	5.31e-06	1.05e-05
ENSG00000247925	ENSG00000247925	2.78885	-1.22292	0.149735	-8.1672	3.16e-16	1.21e-15
ENSG00000247970	ENSG00000247970	5.51737	-1.20802	0.125709	-9.60961	7.28e-22	3.73e-21
ENSG00000248245	ENSG00000248245	3.74445	1.71548	0.21209	8.08844	6.04e-16	2.29e-15
ENSG00000248388	ENSG00000248388	1.45098	-1.01808	0.17782	-5.72533	1.03e-08	2.52e-08
ENSG00000248399	ENSG00000248399	8.7136	2.30835	0.212988	10.8379	2.28e-27	1.5e-26
ENSG00000248576	ENSG00000248576	8.65469	-1.3061	0.132133	-9.88476	4.85e-23	2.62e-22
ENSG00000248596	ENSG00000248596	7.91596	1.37543	0.237099	5.80106	6.59e-09	1.63e-08
ENSG00000248774	ENSG00000248774	10.7566	-1.05363	0.116538	-9.0411	1.55e-19	7.07e-19
ENSG00000248779	ENSG00000248779	294.887	4.61976	0.38946	11.862	1.87e-32	1.54e-31
ENSG00000248896	ENSG00000248896	9.27539	-1.71895	0.093647	-18.3556	2.98e-75	1.07e-73
ENSG00000248954	ENSG00000248954	5.18701	1.33939	0.212611	6.29973	2.98e-10	8.09e-10
ENSG00000248964	ENSG00000248964	4.3325	1.29541	0.239717	5.40389	6.52e-08	1.5e-07
ENSG00000248968	ENSG00000248968	2.62672	1.57362	0.200456	7.85023	4.15e-15	1.5e-14
ENSG00000248994	ENSG00000248994	15.9308	-1.27896	0.172763	-7.403	1.33e-13	4.43e-13
ENSG00000249001	ENSG00000249001	27.4017	4.90788	0.259265	18.93	6.46e-80	2.64e-78
ENSG00000249007	ENSG00000249007	74.8168	1.11951	0.180374	6.20659	5.41e-10	1.44e-09
ENSG00000249141	ENSG00000249141	17.8363	1.5072	0.12804	11.7714	5.48e-32	4.42e-31
ENSG00000249216	ENSG00000249216	4.42157	-1.12252	0.164643	-6.81787	9.24e-12	2.76e-11
ENSG00000249258	ENSG00000249258	2.35494	-1.87123	0.162419	-11.521	1.03e-30	7.91e-30
ENSG00000249304	ENSG00000249304	1.42915	-1.19128	0.220712	-5.39743	6.76e-08	1.56e-07
ENSG00000249451	ENSG00000249451	1.61355	-1.23715	0.173816	-7.11758	1.1e-12	3.46e-12
ENSG00000249574	ENSG00000249574	14.9426	-2.18603	0.218279	-10.0148	1.31e-23	7.28e-23
ENSG00000249602	ENSG00000249602	41.4512	1.45311	0.117342	12.3836	3.21e-35	2.96e-34
ENSG00000249604	ENSG00000249604	2.35454	-1.67537	0.141204	-11.8649	1.8e-32	1.49e-31
ENSG00000249631	ENSG00000249631	1.57871	-1.10504	0.223987	-4.93351	8.08e-07	1.71e-06
ENSG00000249684	ENSG00000249684	100.058	1.77765	0.146463	12.1372	6.71e-34	5.88e-33
ENSG00000249695	ENSG00000249695	6.15444	-2.17928	0.211483	-10.3048	6.71e-25	3.95e-24
ENSG00000249741	ENSG00000249741	9.43753	-1.50023	0.121694	-12.3279	6.41e-35	5.86e-34
ENSG00000249776	ENSG00000249776	1.77607	-1.35041	0.246809	-5.47148	4.46e-08	1.04e-07
ENSG00000249942	ENSG00000249942	4.52512	1.48281	0.342859	4.32485	1.53e-05	2.91e-05
ENSG00000250081	ENSG00000250081	6.88996	2.41126	0.194996	12.3657	4.01e-35	3.69e-34
ENSG00000250101	ENSG00000250101	2.39185	1.56846	0.226426	6.92703	4.3e-12	1.31e-11
ENSG00000250240	ENSG00000250240	9.20506	-1.9503	0.117077	-16.6583	2.64e-62	6.17e-61
ENSG00000250244	ENSG00000250244	8.85948	4.83947	0.30783	15.7212	1.08e-55	2.05e-54
ENSG00000250274	ENSG00000250274	5.28468	1.8258	0.168378	10.8435	2.14e-27	1.41e-26
ENSG00000250282	ENSG00000250282	2.33229	-3.17063	0.173174	-18.3089	7.02e-75	2.47e-73
ENSG00000250415	ENSG00000250415	4.87277	1.06956	0.242201	4.416	1.01e-05	1.95e-05
ENSG00000250424	ENSG00000250424	2.04523	-1.29386	0.162546	-7.95995	1.72e-15	6.35e-15
ENSG00000250602	ENSG00000250602	23.794	-2.08825	0.117174	-17.8218	4.78e-71	1.49e-69
ENSG00000250643	ENSG00000250643	26.6609	2.38904	0.231628	10.3141	6.08e-25	3.59e-24
ENSG00000250654	ENSG00000250654	27.351	-1.4453	0.0965674	-14.9667	1.21e-50	1.96e-49
ENSG00000250659	ENSG00000250659	4.3053	-1.34607	0.132322	-10.1727	2.63e-24	1.51e-23
[truncated: 5,656 more rows]
