# Supplementary material for: A novel signature incorporating genes related to lipid metabolism and immune for prognostic and functional prediction of breast cancer
Source: Aging (Albany NY). 2024 May 20;16(10):8611–29. doi: 10.18632/aging.205828 (PMC11164511; doi:10.18632/aging.205828)
Supplement: Supplementary Table 2 [file aging-16-205828-s002.xlsx]

## Sheet: Sheet1
Supplementary Table 2. Immune pathway gene set and lipid metabolism gene set from GSEA and Import.
LIPID	IMMUNE
APOA2	AZGP1
LCAT	B2M
PLSCR3	CANX
PLA2G6	CD1B
APOA1	CD1C
ABHD5	CD1D
FITM2	CD1E
FABP3	CD4
MIR30C1	CD8A
SLC27A1	CD8B
PLA2G4C	CD74
CDS1	CTSB
CDS2	CTSE
PLA2G4A	CTSL
PLSCR1	CTSS
MFSD2A	FCER1G
ACSL3	FCGRT
LPCAT3	PDIA3
CHKA	HFE
CLN3	HLA-A
FABP5	HLA-B
PIP4K2A	HLA-C
PITPNM2	HLA-DMA
PITPNM3	HLA-DMB
PITPNM1	HLA-DOA
LDLR	HLA-DOB
NR1H3	HLA-DPA1
SCARB1	HLA-DPB1
LPL	HLA-DQA1
NR1H2	HLA-DQA2
DGAT2	HLA-DQB1
SREBF1	HLA-DRA
ACSL1	HLA-DRB1
PNPLA2	HLA-DRB3
FBXW7	HLA-DRB4
DGAT1	HLA-DRB5
PLIN5	HLA-E
C3	HLA-F
NR1H4	HLA-G
ATM	HLA-H
PLCG2	MR1
SYNJ1	HSPA1L
PDGFA	HSPA2
PIK3CA	HSPA4
CRLS1	HSPA5
CAPN2	HSPA6
GNPAT	HSP90AA1
SOCS2	HSP90AB1
PIGK	ICAM1
PIGU	IFNA1
PIGN	IFNA2
PGAP2	IFNA4
PIGW	IFNA5
PIGP	IFNA6
PIGT	IFNA7
PIGA	IFNA8
PIGC	IFNA10
PIGF	IFNA13
PIGH	IFNA14
DPM3	IFNA16
PIGG	IFNA17
PIGX	IFNA21
PIGV	IFNG
MPPE1	KIR2DL1
PGAP1	KIR2DL2
CWH43	KIR2DL3
PIGZ	KIR2DL4
PGAP4	KIR2DS1
PIGO	KIR2DS3
PIGY	KIR2DS4
GPAA1	KIR2DS5
DPM1	KIR3DL1
DPM2	KIR3DL2
PIGQ	KLRC1
PIGM	KLRC2
PGAP3	KLRC3
PIGS	KLRD1
PIGL	CIITA
PIGB	MICA
PEMT	PSMB8
PNPLA3	PSMC2
GPAM	PSMC3
ABHD4	PSMC4
ABHD8	PSMC5
PIK3C3	PSMC6
INPP5F	PSMD1
LIPI	PSMD2
LIPH	PSMD3
PIK3CG	PSMD4
SACM1L	PSMD5
INPP5J	PSMD7
INPP5D	PSMD8
INPPL1	PSMD10
MTM1	PSMD11
OCRL	PSMD13
INPP5K	PSME1
INPP5E	PSME2
PTEN	RELB
MTMR1	RFX5
INPP4B	RFXAP
SYNJ2	TAP1
MTMR3	TAP2
MTMR2	TAPBP
MTMR6	SEM1
MTMR7	AP3B1
MTMR4	RFXANK
TPTE2	PSMD6
FIG4	PSME3
LPCAT4	PSMD14
PLD1	PROCR
PLD2	ADRM1
LPCAT2	ECPAS
CHPT1	TRPC4AP
LPCAT1	CD209
DGKA	UBXN1
DGKB	ERAP1
DGKG	TAPBPL
DGKH	KIR2DL5A
DGKQ	ERAP2
DGKZ	ULBP3
DGKE	ULBP2
DGKD	ULBP1
BPNT1	KIR3DL3
CEPT1	RAET1E
CDIPT	RAET1L
AGPAT1	UBR1
AGPAT2	RAET1G
P3R3URF	PDIA2
CHAT	PI3
CHKB	DEFB4A
PTPMT1	REG3G
CISH	CXCL12
IP6K3	XCL1
SOCS4	DEFB103B
SLC44A3	CCL13
TMEM150A	CCL1
TAMM41	DEFB1
GPAT4	CCL8
PIP5KL1	DEFB103A
TTC7B	TMSB10
PIK3R6	LCN1
GPAT2	COLEC10
ABHD3	DCD
PIKFYVE	HTN3
SLC44A5	LCN8
FGF2	CCR10
ATG14	CELA1
EFR3B	DEFB106A
SMG1	BPIFC
EFR3A	BPIFB6
LPIN1	LEAP2
PIP5K1C	SFTPD
SLC44A1	LCN9
RAB38	TMSB4X
PISD	ZC3HAV1
ALOX15	TMSB15A
IPMK	S100B
LCLAT1	S100A13
DHRS7B	S100A6
PIPSL	DEFB119
SH3YL1	DEFB107A
HDHD5	DEFB105A
FAM126B	SERPIND1
SOCS7	DEFB129
PIK3R4	DEFB127
HTR2A	DEFB126
HTR2B	DEFB106B
HTR2C	DEFB107B
IMPA1	PGLYRP3
IMPA2	PGLYRP2
INPP1	S100A10
INPP4A	DEFB125
ITPKA	DEFB123
ITPKB	DEFB105B
PI4KAP2	DEFB132
ACP6	BPIFB3
PCYT1A	LCN12
IP6K2	PGLYRP4
PDGFB	S100A5
PIK3C2A	S100A1
PIK3C2B	DEFB128
PIK3C2G	DEFB108B
PIK3CB	HTN1
PIK3CD	LMBR1L
PIK3R1	S100A7A
PIK3R2	DEFB118
PI4KA	COLEC12
PI4KB	TMSB4Y
BPNT2	DEFB131A
ETNK2	DEFB134
PI4K2B	DEFB130A
AGPAT5	DEFB124
PI4K2A	DEFB121
ETNK1	DEFB116
VAC14	DEFB115
AGPAT3	DEFB113
AGPAT4	DEFB112
SLC44A2	DEFB110
TTC7A	TMSB15B
PCYT2	DEFB133
MTMR14	S100Z
BMX	MAVS
TAFAZZIN	TMSB4XP8
PI4KAP1	S100A16
UVRAG	DEFB136
MBOAT7	DEFB135
PIP4K2C	DEFB117
ITPKC	ZC3HAV1L
SLC44A4	S100A7L2
PTDSS2	MBL3P
PIP5K1A	DEFB4B
PIP5K1B	BPIFB4
PIP4K2B	DEFB131B
SLA2	DEFA1A3
FAR1	LCN1P1
FAM126A	S100G
GPAT3	DEFA7P
AJUBA	DEFB130B
PIK3R3	DEFB108F
SELENOI	DEFB131C
SOCS1	TCHHL1
BECN1	IFNGR1
SOCS3	SLC22A17
SOCS6	WFIKKN1
PCYT1B	UMODL1
PGS1	ANOS1
SOCS5	SPAG11B
PTDSS1	APOBEC3G
IP6K1	MBL2
LPGAT1	SLC40A1
GPLD1	HJV
PLA2G15	MUC5AC
PCK1	OBP2A
PCK2	MX1
AGMO	DDX58
MIR548P	IFNL1
AVIL	SFTPA2
MOGAT1	NOX4
SIK1	IFNB1
AWAT2	R3HDML
CTDNEP1	BPIFA3
CNEP1R1	BPIFB1
GK	OASL
ANG	OBP2B
MOGAT3	LCN15
DGAT2L6	C8G
MIR29B1	SPAG11A
PLCE1	PI15
LPIN3	NOX1
THRSP	ORM2
MOGAT2	ORM1
RGN	PML
LPIN2	AEN
SERAC1	ISG20
APOA4	BCL3
ABCA3	ISG20L2
PON1	NOX5
APOA5	NOX3
LIPG	DUOX2
PCSK9	TLR3
PLA2G10	IFIH1
APOC2	GDF15
LIPC	STAT1
PNPLA8	IFNL2
CETP	SEMG1
DBI	TNFSF10
APOC1	RNASEL
OSBPL8	IRF1
PLA2G5	APOBEC3F
PLA2G4F	CD40
PLA2G3	TLR7
PLA2G2D	PPIA
PLA2G2E	ZYX
PLA2G1B	NLRX1
PLA2G2A	PGC
PLA2G2F	VEGFA
OSBPL5	DHX58
OSBPL10	TFR2
STOML2	FCN2
APOB	IL27
SIRT1	MAPT
CAV1	LYZ
CPT1A	CYLD
APOE	KLKB1
MTTP	CST4
APOC3	JUN
PTPN11	IRF5
SLC27A5	CCR6
APOH	TLR8
APOBR	EIF2AK2
SERINC5	CACYBP
SERINC1	NOD1
PLAAT3	BST2
MBOAT2	BPHL
MBOAT1	GRN
PLCB1	NEWENTRY
PHB2	ADAR
PDGFRB	TYK2
SMPD4	TRAF3
ENPP2	TPT1
PNLIPRP2	NEO1
SERINC3	TLR1
NAAA	TK2
SERINC2	MX2
ABHD12	TCF7L2
PLA2G4B	TKFC
PLA2G4E	NFKBIZ
ENPP6	LMBR1
PLA2G7	EPPIN
PNPLA6	ELAVL1
ABHD16B	PDF
ABHD12B	DLL4
PLB1	ECD
PLA2G4D	DMBT1
GDPD1	STING1
PNPLA7	SKIV2L
GDE1	SEMG2
GPCPD1	DCK
ABHD6	TNFRSF10A
GDPD3	TNFRSF10B
ABHD16A	EED
PRDX6	CCL4
NAPEPLD	LIMS1
PLCG1	LALBA
MTMR11	APOBEC3H
CHRM5	TMPRSS6
INPP5A	SPINK5
INPP5B	MARCO
MTMR12	KNG1
MTMR10	CSK
PIP4P2	KCNH2
MTMR8	JAK1
MTMR9	CCL28
TPTE	RNASE3
PIP4P1	RN7SL1
PAFAH1B1	IRF7
PLAAT5	IREB2
DNAJC19	IL17A
CSF1R	LTB4R
TMEM86B	MASP2
GNB3	TRIM27
PGP	IFNAR2
THEM5	IFN1@
HADHA	SYTL1
MECP2	APOBEC3C
PLA1A	HTR1A
PLCB2	SEPTIN7
PLCB3	CD40LG
PLCD1	MAP2K2
PLEK	MAP2K1
PLAAT2	HRG
PLAAT1	NDRG1
PLAAT4	TRIM22
PLCD4	LANCL1
GALR2	PPP4C
PLCH2	HMOX1
INSIG1	RNASE7
ABHD2	IFNLR1
CPS1	BACH2
GPX1	TANK
INSIG2	ARRB1
CAT	RSAD2
PNPLA1	STAB2
AGK	TBK1
GAL3ST1	PDYN
PNPLA5	PDCD1
GPIHBP1	PCSK2
PNPLA4	ARG2
G6PC1	VTN
CAV3	PRDX1
APOBEC1	GFAP
LYPLA2	GBP2
TBL1XR1	ALB
MGLL	SLC29A3
AADAC	UNC93B1
FAAH	ACO1
DAGLB	CCL15
DDHD2	CCL16
FGF21	CCL19
LIPE	CCL18
SORL1	CCL17
DAGLA	CCL26
DGKK	CCR3
DGKI	CCL4L1
SERPINA12	ACKR2
CYP2E1	CCL27
NKX2-3	CCR8
GK5	ACKR4
GK2	CCL21
GPD1	CCL7
SEL1L	CCL11
LMF1	CCL25
SLC22A4	CCL3L3
TNXB	CCL4L2
PANK2	CCL3L1
LIPF	CCR1
ABCA2	CCL24
PPARD	XCL2
ABCA8	CXCR4
OSBP	CXCR6
VAPA	CCR4
HEXB	TAFA5
NUS1	TAFA3
FITM1	TAFA4
ENPP7	TAFA1
CLN8	TAFA2
PRKCD	CCL15-CCL14
SGPP1	IL4
ANGPTL3	LTBP1
PLA2G12B	IL2
PLPPR4	PTK2
PLA2G2C	PTGDR
PLA2G12A	GRK2
PROCA1	TXK
TNFAIP8L3	RNASE2
OC90	CD79B
PRKAA1	BTK
GBA	BLNK
P2RX7	VAV3
ABCA1	VAV1
PPARG	VAV2
ABCB4	RAC1
CYP7A1	RAC2
ABCG1	PPP3CA
CES1	PPP3CB
TREM2	PPP3CC
AKR1C1	PPP3R1
MIR128-1	PPP3R2
NPC1	CHP2
GRAMD1B	NFAT5
ABCB11	NFATC1
PPARA	NFATC2
LEP	NFATC3
CD36	NFATC4
AGT	HRAS
RXRA	KRAS
CRY1	NRAS
CRY2	CARD11
IL1B	CHUK
FFAR2	IKBKB
IL6	IKBKG
MIR146A	NFKBIE
NFKB1	CD19
NFKBIA	CD22
STAT5B	CD72
TNF	PTPN6
ZC3H12A	FCGR2B
NRIP1	RASGRP3
FASLG	PRKCB
PLSCR4	IFITM1
CYP19A1	IGH
DAB2	IGHA1
EDN1	IGHA2
IL1A	IGHD
INHBA	IGHD1-1
MIF	IGHD1-14
NKX3-1	IGHD1-20
NOS2	IGHD1-26
OXT	IGHD1-7
REN	IGHD2-15
BMP6	IGHD2-2
SPP1	IGHD2-21
TMF1	IGHD2-8
FZD4	IGHD3-10
TNFRSF11A	IGHD3-16
AKT1	IGHD3-22
RPS6KB1	IGHD3-3
THBS1	IGHD3-9
CFTR	IGHD4-11
AKR1C4	IGHD4-17
OSBPL7	IGHD4-23
CLU	IGHD4-4
CYP8B1	IGHD5-12
ACE	IGHD5-18
ANXA1	IGHD5-24
LBP	IGHD5-5
LRP6	IGHD6-13
MIR17	IGHD6-19
NTSR1	IGHD6-25
GRAMD1C	IGHD6-6
PTCH1	IGHD7-27
GRAMD1A	IGHE
RBP4	IGHG1
STRA6	IGHG2
SLC10A1	IGHG3
SSTR4	IGHG4
SYK	IGHJ1
TSPO	IGHJ2
SLC10A3	IGHJ3
LRAT	IGHJ4
ADIPOQ	IGHJ5
VPS4B	IGHJ6
ABCA12	IGHM
CERT1	IGHV1-18
UGCG	IGHV1-2
B4GALNT1	IGHV1-24
SPNS2	IGHV1-3
GM2A	IGHV1-45
CEL	IGHV1-46
GLTP	IGHV1-58
TEX2	IGHV1-69
PSAP	IGHV1-8
ARV1	IGHV1-38-4
CPTP	IGHV1-69-2
APOM	IGHV2-26
SREBF2	IGHV2-5
EHD1	IGHV2-70
TTC39B	IGHV3-11
APOC4	IGHV3-13
MIR144	IGHV3-15
MIR34A	IGHV3-16
SOAT1	IGHV3-20
IRS2	IGHV3-21
NPC2	IGHV3-23
SEC24A	IGHV3-30
ABCD1	IGHV3-30-3
FABP4	IGHV3-30-5
ABCA5	IGHV3-33
TSKU	IGHV3-35
LDLRAP1	IGHV3-38
MIR148A	IGHV3-43
MIR19B1	IGHV3-48
MIR27B	IGHV3-49
MIR302A	IGHV3-53
MIR33A	IGHV3-64
SAR1B	IGHV3-66
LIMA1	IGHV3-7
LAMTOR1	IGHV3-72
DISP3	IGHV3-73
RBP1	IGHV3-74
ABCG4	IGHV3-9
ABCG5	IGHV3-38-3
ABCG8	IGHV3-69-1
SURF4	IGHV4-28
MIR33B	IGHV4-30-1
SOAT2	IGHV4-30-2
ZDHHC8	IGHV4-30-4
ITGAV	IGHV4-31
ITGB3	IGHV4-34
APOL2	IGHV4-39
NPC1L1	IGHV4-4
APOD	IGHV4-59
APOL6	IGHV4-61
APOL5	IGHV4-38-2
APOL4	IGHV5-51
APOL3	IGHV5-10-1
APOLD1	IGHV6-1
APOL1	IGHV7-4-1
PLIN2	IGHV7-81
CPT2	IGK
CYP4A11	IGKC
FABP1	IGKDEL
GPS2	IGKJ
CIDEA	IGKJ1
HILPDA	IGKJ2
PLIN3	IGKJ3
OSBPL11	IGKJ4
ACVR1C	IGKJ5
STARD4	IGKV@
CRP	IGKV1-12
VSTM2A	IGKV1-13
BSCL2	IGKV1-16
ACACB	IGKV1-17
MIR10B	IGKV1-27
MEST	IGKV1-33
SMIM22	IGKV1-37
MSR1	IGKV1-39
ENPP1	IGKV1-5
ZFYVE1	IGKV1-6
AUP1	IGKV1-8
LDAF1	IGKV1-9
RNF213	IGKV1D-12
PTPN2	IGKV1D-13
LDAH	IGKV1D-16
SQLE	IGKV1D-17
FTO	IGKV1D-33
ALKBH7	IGKV1D-37
IKBKE	IGKV1D-39
ATP9A	IGKV1D-42
ABCA7	IGKV1D-43
ATP8A1	IGKV1D-8
XKR4	IGKV2-24
ANO4	IGKV2-28
ATP8B3	IGKV2-30
TMEM30B	IGKV2-40
ANO6	IGKV2D-24
ATP10B	IGKV2D-28
ATP11B	IGKV2D-29
ATP11A	IGKV2D-30
ABCA4	IGKV2D-40
ATG9B	IGKV3-11
XKR6	IGKV3-15
ATP11C	IGKV3-20
ANO9	IGKV3-7
XKR7	IGKV3D-11
ATP9B	IGKV3D-15
KCNN4	IGKV3D-20
PLSCR5	IGKV3D-7
XKR5	IGKV4-1
XKR9	IGKV5-2
ABCC1	IGKV6-21
TMEM41B	IGKV6D-21
ANO7	IGKV6D-41
ATP8A2	IGL
ATP8B1	IGLC1
ABCB1	IGLC2
XKR8	IGLC3
TMEM30A	IGLC6
PLSCR2	IGLC7
ATP10A	IGLJ
ATP8B2	IGLJ1
ATP10D	IGLJ2
ANO3	IGLJ3
TMEM30CP	IGLJ4
SLC4A1	IGLJ5
TRPC5	IGLJ6
ATG9A	IGLJ7
ATP8B4	IGLV@
SLC66A2	IGLV1-36
VMP1	IGLV1-40
RFT1	IGLV1-44
ABCC4	IGLV1-47
KDM5B	IGLV1-50
C1QTNF1	IGLV1-51
CRH	IGLV10-54
CRHR1	IGLV11-55
SELENOM	IGLV2-11
AGTR1	IGLV2-14
GALR1	IGLV2-18
GDF9	IGLV2-23
KCNQ1	IGLV2-33
P2RX4	IGLV2-8
GAL	IGLV3-1
GHRL	IGLV3-10
POMC	IGLV3-12
MAP2K6	IGLV3-16
RETN	IGLV3-19
TNFSF11	IGLV3-21
PTGES	IGLV3-22
SLC27A4	IGLV3-25
SLC27A2	IGLV3-27
EPRS1	IGLV3-32
AKT2	IGLV3-9
ACSL5	IGLV4-3
SLC2A1	IGLV4-60
SPX	IGLV4-69
CIDEC	IGLV5-37
MIR301B	IGLV5-39
SIGMAR1	IGLV5-45
ABCA10	IGLV5-48
ABCA9	IGLV5-52
SLC25A17	IGLV6-57
SLCO1B1	IGLV7-43
PRELID3A	IGLV7-46
STARD10	IGLV8-61
CFHR4	IGLV9-49
STARD3	C5
SLC27A3	CCL3P1
SLCO2B1	CKLF
SLC22A9	CMA1
OSBPL1A	EDN2
OSBPL6	EDN3
OSBPL9	LECT2
RBP7	PPBPP1
PRAP1	SAA1
PDZD8	SAA2
SLC51B	SBDS
ABCC2	SEMA3A
NAXE	SEMA3C
CPT1B	SEMA3D
CRABP1	SEMA3E
CRABP2	SEMA3F
SCP2D1	SEMA4A
STARD6	SEMA4B
ERFE	SEMA4C
PRELID2	SEMA4D
ABCA13	SEMA4F
DENND5B	SEMA4G
SLC5A8	SEMA5A
DRD2	SEMA5B
DRD3	SEMA6B
DRD4	SEMA6C
EGF	SEMA6D
SLC51A	SEMA7A
SPNS3	SLIT1
SLC10A4	TNC
FABP2	TYMP
FABP6	CCR9
FABP7	CCRL2
TPCN2	CMKLR1
FABP5P3	CXCR5
TSPO2	ACKR3
ABCD2	CYSLTR1
PLA2R1	CYSLTR2
ATG2A	EDNRA
ESYT1	GPR32
ABCA6	GPR33
STX12	PTGDR2
PITPNB	C5AR2
OSBP2	LTB4R2
LRP10	PLXNA1
OSBPL3	PLXNA2
PITPNC1	PLXNA3
PRELID1	PLXNA4
VPS4A	PLXNB1
GOT2	PLXNB2
SLCO3A1	PLXNB3
SLCO1B3	PLXNC1
SLC22A24	PLXND1
SLC27A6	ROBO1
ANXA2	ROBO2
HDLBP	RXFP3
APOF	XCR1
SLCO1B7	AGRP
SLC10A6	AMBN
SLC10A5	AMELX
AQP9	AMH
YJEFN3	ANGPTL5
GLTPD2	ANGPTL7
MFSD2B	APLN
LPA	MANF
LRP1	CDNF
MIR130B	ARTN
MIR206	BDNF
MIR26A1	BMP1
MIR27A	BMP10
NMB	BMP15
NME4	BMP2
FURIN	BMP5
PRKN	BMP8A
PRELID3B	BMP8B
FIS1	BTC
SERPINA5	MYDGF
PLEKHA8P1	CALCA
GULP1	CALCB
TRIAP1	CCK
PITPNA	CD320
PLTP	CD70
PMP2	ADA2
SLCO1C1	CER1
PNLIP	CGA
CROT	CGB3
ATG2B	CGB1
ARL8B	CGB2
AVPR1B	CGB5
NMUR2	CGB7
ESYT2	CGB8
RELCH	CHGA
ABCD3	CHGB
ABCD4	CLCF1
PCTP	CLEC11A
RBP2	CMTM1
BDKRB2	CMTM3
CEACAM1	CMTM4
SCP2	CMTM5
FABP9	CMTM6
FABP12	CMTM7
SHH	CMTM8
SFTPA1	CNTF
SLC10A2	CORT
SLCO2A1	CSF1
SLCO1A2	CSH1
PLEKHA3	CSH2
STAR	CSHL1
MIR613	CSPG5
TTPA	CTF1
VPS51	EBI3
VLDLR	EPGN
MIR758	EREG
SLC25A20	ESM1
APOO	FAM3C
STARD5	FAM3D
EEPD1	FGF11
RBP5	FGF12
ESYT3	FGF13
SPNS1	FGF14
SLC10A7	FGF16
NR0B2	FGF17
PLEKHA8	FGF18
CYP4F2	FGF20
ABCC11	FGF22
ABCC3	FGF3
ABCC10	FGF4
SYT7	FGF5
STOML1	FGF6
ABCG2	FGF8
SCARB2	FGF9
C2CD2L	FIGNL2
OSBPL2	FSHB
FGF19	GALP
SPHK2	GAST
HMGCS2	GCG
IDH1	GDF1
PMVK	GDF11
ORMDL3	GDF2
SPTLC1	GDF3
SAMD8	GDF5
SGMS2	GDF6
SGMS1	GDF7
SPTLC2	GDNF
HMGCS1	GH2
FADS1	GHRH
CHP1	GKN1
ADGRF5	GMFB
FDPS	GMFG
DOLK	GNRH2
IDI1	GPHA2
MVD	GPHB5
MVK	GREM2
ISYNA1	GRP
TMEM38B	GUCA2A
DOLPP1	HDGF
SERINC4	HDGFL3
SRD5A3	IAPP
DHDDS	IFNE
IDI2	IFNK
GGPS1	IFNW1
PLPP1	IGF2
GATA6	IL11
GPX4	IL17B
SNCA	IL17C
PLAA	IL17D
SMPD1	IL17F
SMPD2	IL19
PLPP2	IL20
PLPP3	IL21
SMPDL3A	IL23A
SMPDL3B	IL25
SMPD3	IL26
BLOC1S6	IFNL3
FDFT1	IL3
PLPP6	IL31
PLBD2	IL32
PLBD1	IL33
PLPPR5	IL34
PLPP4	IL5
PLPPR1	IL6ST
PLPPR2	IL7
PLPPR3	IL9
PLPP5	INHA
ALOX15B	INHBC
LGALS13	INHBE
CYP2W1	INS-IGF2
ACER2	INSL3
CYP1B1	INSL4
GLB1	INSL5
HTRA2	INSL6
TH	JAG2
RORA	FGF7P6
NR1D1	FGF7P3
FGFR4	KITLG
GIP	LEFTY1
GOT1	LEFTY2
IL18	LHB
MIR182	LIF
MIR185	LRSAM1
XBP1	LTB
CYP7B1	LTBP2
IRGM	LTBP3
CARM1	MIA
NCOA2	MLN
PPARGC1B	NAMPT
CYP1A1	NDP
AHR	NENF
EP300	NGF
ESRRA	CCN3
CDK19	NPPB
ANKRD1	NPPC
ARNTL	NPY
MED1	NRG1
RXRB	NRG2
NCOA3	NRG3
CLOCK	NRG4
NCOR1	NRTN
NCOR2	NTF3
NR2E3	NTF4
HDAC6	NTS
BCL2L11	NUDT6
KLRC4-KLRK1	OSGIN1
IL18BP	OSM
PTPRU	OSTN
PDCD7	ENDOU
ARPC1B	PDGFC
CDK4	PDGFD
TRIB1	PGF
CD96	PMCH
MIR6869	PNOC
RIDA	PPBPP2
RAMP3	PPY
CDKN1B	PRL
AKAP8	PRLH
LILRB2	PROK1
TNIP1	PSPN
CDKN2D	PTH2
CDO1	PTHLH
YAP1	PTN
SPON2	PYY
PGRMC2	QRFP
TADA3	RABEP1
HOXB13	RABEP2
CEBPB	REG1A
DDX17	RETNLB
KAT5	RLN1
CEBPE	RLN2
CXCL13	RLN3
PRPF8	SCG2
TRIM16	SCGB3A1
TXNIP	SCT
ADCY1	AIMP1
PTGES3	SECTM1
ADCY2	SLURP1
GJB6	TAC1
RUVBL2	TDGF1
LILRB1	TDGF1P3
ARID5A	TG
GPR83	TNFRSF11B
MALT1	TNFSF12
ADCY3	TNFSF13B
PRDX3	TNFSF14
HNRNPA0	TNFSF15
IL24	TNFSF18
LIAS	TNFSF8
LILRA2	TNFSF9
SOX30	TOR2A
ADAMTS13	TRH
ADCY5	TSLP
FAM107A	TXLNA
MAP4K1	UCN2
ADCY6	UTS2
FZD10	UTS2B
IRAK3	VEGFB
DUSP10	VEGFC
EGLN2	VGF
PADI2	ACVR1B
PARK7	ACVR2A
CBX3	ACVR2B
TWF2	ADIPOR1
ADCY8	ADIPOR2
UCN3	AGTR2
NLRP3	AMHR2
TIRAP	ANGPT4
CARD16	ANGPTL2
FBXO32	ANGPTL6
FAM210B	APLNR
ADCYAP1R1	AVPR2
TRIM6	BMPR1A
TPH2	BMPR1B
CCR5	BMPR2
CCR7	BRD8
OVCA2	C3AR1
CNGA3	CRHR2
CNP	CRIM1
CNR1	CRLF1
CNR2	CRLF2
COL1A1	CRLF3
ADH5	CSF2RA
CMPK2	EPOR
OSR1	FGFR3
ADM	FGFRL1
CLDN4	FLT1
CPN1	FSHR
CREB1	GALR3
CRHBP	GCGR
DEFB104A	GLP1R
CST11	GLP2R
SIRPA	GNRHR
CRYAB	HTR3B
PARP1	HTR3D
MAPK14	HTR3E
CSF2	IFNGR2
CSF2RB	IL10RB
CSF3	IL12RB1
CSN1S1	IL13RA1
TICAM1	IL13RA2
CCN2	IL15RA
IL23R	IL2RB
SRARP	IL17RA
CTNNB1	IL17RB
AANAT	IL17RC
CTSG	IL17RD
CTSH	IL17RE
GPBAR1	IL1R1
CX3CR1	IL1RAP
DAB2IP	IL1RL2
CYBA	IL20RA
CYBB	IL20RB
RHOXF1	IL21R
CYP24A1	IL22RA1
CYP26A1	IL22RA2
CYP27B1	IL27RA
CD55	IL2RA
DAG1	IL2RG
DNAAF4	IL31RA
DAXX	IL3RA
BRINP1	IL4R
PAQR7	IL5RA
AKR1C2	IL6R
DDX5	IL9R
DEFA1	INSR
DEFA3	KDR
DEFA4	LEPR
DEFA5	LGR5
DEFA6	LGR6
ZNF366	LHCGR
ASXL1	LIFR
NQO1	LTBR
DIO2	MC1R
AGL	MC2R
DNMT3A	MC3R
DSG1	MC4R
E2F1	MCHR1
NR0B1	MCHR2
EDNRB	MLNR
EFNA5	MPL
EFNB2	MTNR1A
EGFR	MTNR1B
METTL21C	NGFR
EIF4E	NMBR
AIF1	NPR3
ELANE	NR1I2
NLRP7	NR1I3
A2M	NR2C2
ELK1	NR2F1
ENDOG	NR2F6
ENG	NR4A2
ENO2	NR5A1
EPHA3	NR6A1
EPHB2	NRP1
EPO	NRP2
ESR1	OGFR
ALAD	OPRD1
ESR2	OSMR
ESRRB	PRLHR
ESRRG	PRLR
EZH2	PTGER3
F2R	PTH2R
F7	RARB
PTK2B	RXFP1
FDX1	RXFP2
FER	S1PR2
FES	SCTR
FGF10	SDC2
FGFR2	SDC3
ADNP2	SDC4
FKBP4	SORT1
CARD8	ST2
SBNO2	THRA
KLRK1	THRB
SNW1	TNFRSF10C
DKK1	TNFRSF10D
CNOT1	TNFRSF13B
KDM1A	TNFRSF13C
SETX	TNFRSF18
FOXO1	TNFRSF19
KDM4C	TNFRSF1A
FOXO3	TNFRSF25
TAB2	TNFRSF4
ACSBG1	TNFRSF8
MLC1	TNFRSF9
FLT3	TRHR
FMO1	TSHR
SASH1	TUBB3
UFL1	VIPR2
FOS	ITGAL
FOSB	ITGB2
RBFOX2	NCR2
WBP2	TYROBP
LDOC1	LCK
LY96	FCGR3A
SHPK	NCR1
DEFB114	NCR3
ALPL	CD247
ABL1	LCP2
GABRB1	SH3BP2
NOCT	FYN
KANK2	SHC4
PTPN22	SHC3
STAP1	SHC1
GATA1	GRB2
GATA2	SOS1
GATA4	SOS2
GCH1	ARAF
HEYL	BRAF
IL36RN	RAF1
MSTN	HCST
NPAS4	CD48
GFER	CD244
GFI1	PRKCG
GH1	SH2D1B
GHR	SH2D1A
GHRHR	FAS
GHSR	GZMB
GIPR	PRF1
ABL2	BID
GJB2	CD3D
GJB3	CD3E
FOXP1	CD3G
IL36B	PTPRC
IL37	ITK
IL36A	TEC
PDCD4	NCK1
GLDC	NCK2
GNAI1	GRAP2
GNRH1	PAK2
GPI	PAK3
DYNAP	PAK4
GPER1	PAK6
FFAR1	PAK5
FFAR3	CDC42
ILDR1	CD28
GPX3	ICOS
GIT1	MAP3K14
NR3C1	CTLA4
PYCARD	CBLB
CD274	RASGRP1
CXCL1	PDK1
CXCL2	PRKCQ
CXCL3	TRAC
GSK3B	TRAJ1
GSTP1	TRAJ2
STRN3	TRAJ3
H2AZ1	TRAJ4
HCK	TRAJ5
ANXA3	TRAJ6
HDAC1	TRAJ7
HDAC2	TRAJ8
HMGB1	TRAJ9
HMGB2	TRAJ10
NR4A1	TRAJ11
FOXA1	TRAJ12
HNRNPD	TRAJ13
HNRNPU	TRAJ14
HOXA2	TRAJ15
HOXA10	TRAJ16
HOXA11	TRAJ17
HOXA13	TRAJ18
HOXD13	TRAJ19
HPGD	TRAJ20
PRMT2	TRAJ21
HES1	TRAJ22
HSD3B1	TRAJ23
HSD3B2	TRAJ24
HSD11B2	TRAJ25
HSD17B2	TRAJ26
HSF1	TRAJ27
HSPA1A	TRAJ28
HSPA1B	TRAJ29
HSPA8	TRAJ30
HTR1B	TRAJ31
HTR5A	TRAJ32
IRF8	TRAJ33
BRINP3	TRAJ34
ID3	TRAJ35
PALM3	TRAJ36
IFNAR1	TRAJ37
STRA8	TRAJ38
IGF1R	TRAJ39
IGF2R	TRAJ40
IGFBP2	TRAJ41
IGFBP7	TRAJ42
TICAM2	TRAJ43
IHH	TRAJ44
IL1RN	TRAJ45
CXCL8	TRAJ46
AQP1	TRAJ47
IL10	TRAJ48
IL10RA	TRAJ49
IL12A	TRAJ50
IL12B	TRAJ52
IL12RB2	TRAJ53
IL13	TRAJ54
AQP3	TRAJ56
IL15	TRAJ57
AQP4	TRAJ58
IDO1	TRAJ59
INHBB	TRAJ61
CXCL10	TRAV1-1
PDX1	TRAV1-2
IRAK1	TRAV2
IRAK2	TRAV3
IRF3	TRAV4
IRS1	TRAV5
AR	TRAV7
ISL1	TRAV8-1
ITGA2	TRAV8-2
JAK2	TRAV8-3
JUND	TRAV8-4
AREG	TRAV8-6
KCNJ8	TRAV8-7
KCNMB1	TRAV9-1
ARG1	TRAV9-2
RHOA	TRAV10
FIBIN	TRAV12-1
SCIMP	TRAV12-2
MEIOSIN	TRAV12-3
NUGGC	TRAV13-1
LGALS9	TRAV13-2
LOX	TRAV14DV4
LOXL1	TRAV16
LTA	TRAV17
LTF	TRAV18
LTK	TRAV19
CD180	TRAV20
LYN	TRAV21
MIR125B1	TRAV22
MIR140	TRAV23DV6
MIR142	TRAV24
MIR187	TRAV25
MIR20A	TRAV26-1
MIR21	TRAV26-2
MIR224	TRAV27
MIR92A1	TRAV29DV5
MIR96	TRAV30
SMAD2	TRAV34
SMAD6	TRAV35
MAOB	TRAV36DV7
MAP1B	TRAV38-1
MBP	TRAV38-2DV8
MDK	TRAV39
MEF2C	TRAV40
SCGB2A1	TRAV41
SCGB2A2	TRBC1
MGST1	TRBC2
MICB	TRBD1
CXCL9	TRBD2
ASCL1	TRBJ1-1
NR3C2	TRBJ1-2
MMP2	TRBJ1-3
MMP15	TRBJ1-4
MN1	TRBJ1-5
MPO	TRBJ1-6
MRC1	TRBJ2-1
CARD17	TRBJ2-2
MIR342	TRBJ2-3
CITED1	TRBJ2-4
ASS1	TRBJ2-5
MSN	TRBJ2-6
MSX2	TRBJ2-7
MTAP	TRBV2
MT-ND3	TRBV3-1
MYC	TRBV4-1
MYD88	TRBV4-2
MYOD1	TRBV4-3
MYOG	TRBV5-1
NASP	TRBV5-4
NEDD4	TRBV5-5
NEFL	TRBV5-6
ATP1A1	TRBV5-7
ATP1A2	TRBV5-8
ATP1A3	TRBV6-1
NFKBIB	TRBV6-2
NFKBIL1	TRBV6-3
NKX2-2	TRBV6-4
NODAL	TRBV6-5
NOS1	TRBV6-6
NOS3	TRBV6-7
CNOT2	TRBV6-8
NOTCH1	TRBV6-9
ACR	TRBV7-2
ATP2B1	TRBV7-3
NTRK3	TRBV7-4
ATP4B	TRBV7-6
OGG1	TRBV7-7
ATP5F1A	TRBV7-8
OPRK1	TRBV7-9
OPRL1	TRBV9
OPRM1	TRBV10-1
OXTR	TRBV10-2
DEFB104B	TRBV10-3
SERPINE1	TRBV11-1
PAK1	TRBV11-2
IL22	TRBV11-3
PAM	TRBV12-3
PAPPA	TRBV12-4
PAX2	TRBV12-5
KCNK4	TRBV13
DHH	TRBV14
FOXP3	TRBV15
NDUFA13	TRBV16
PCNA	TRBV17
PCSK1	TRBV18
ZBTB7A	TRBV19
UBR5	TRBV20-1
RWDD1	TRBV24-1
PDE4B	TRBV25-1
CHMP5	TRBV27
UFM1	TRBV28
PDK3	TRBV29-1
PDK4	TRBV30
SERPINF1	TRDC
PENK	TRDD1
PER1	TRDD2
PF4	TRDD3
PF4V1	TRDJ1
PFKFB1	TRDJ2
PGR	TRDJ3
PHB	TRDJ4
PHEX	TRDV1
PIM1	TRDV2
PLAT	TRDV3
MBD3	TRGV9
ACP5	TRGV8
ERRFI1	TRGV5
GDAP1	TRGV4
XRN1	TRGV3
POR	TRGV2
DDIT4	TRGJP2
POU4F1	TRGJP1
POU4F2	TRGJP
PAF1	TRGJ2
UGT1A1	TRGJ1
PPBP	TRGC2
GDAP2	TRGC1
TMEM161A	TRAV6
TESC	FABP3
PID1	PLSCR1
AVP	NR1H3
AKIRIN2	NR1H2
TRIM68	C3
DNAAF2	NR1H4
AVPR1A	PLCG2
UFSP2	PDGFA
PPP5C	PIK3CA
OTUD5	PIK3CG
PRKCA	INPP5D
AXL	PDGFB
TRERF1	PIK3CB
PRKCE	PIK3CD
KDM3A	PIK3R1
VPS11	PIK3R3
SELENOS	SOCS1
PKN1	BECN1
LMO3	SOCS3
ERBIN	CETP
LANCL2	PTPN11
MAPK1	APOH
MAPK3	PLCG1
MAPK8	CSF1R
MAP2K3	PLAAT4
IL36G	GALR2
CYP26B1	CAT
PMEPA1	FGF21
PELI1	PPARD
ZMIZ1	ANGPTL3
BAD	PPARG
PSPH	PPARA
PTAFR	LEP
PTGER1	AGT
PTGER2	RXRA
PTGER4	IL1B
PTGFR	NFKB1
AICDA	NFKBIA
PTGIR	TNF
S100A14	FASLG
MIR433	EDN1
MIR431	IL1A
PTH	INHBA
PTGS2	NOS2
PTK6	OXT
PTK7	BMP6
VPS18	TNFRSF11A
CALCOCO1	AKT1
BRINP2	LBP
HAMP	RBP4
ACTA1	SYK
CACTIN	ADIPOQ
BCHE	APOM
RAN	RBP1
RARA	ITGAV
RARG	ACVR1C
SIGIRR	CRP
RBBP7	MSR1
BCKDHB	IKBKE
CCND1	ABCC4
BCL2	CRH
RELA	CRHR1
UPF1	GDF9
REST	GAL
RET	GHRL
BCL2L2	POMC
RNF6	TNFSF11
RORB	AKT2
RORC	RBP7
BCR	CRABP1
RPL27	EGF
RPS6KA3	FABP2
BDKRB1	FABP6
RXRG	FABP7
S100A7	LPA
S100A8	LRP1
S100A9	NMB
SAFB	FURIN
SCD	PLTP
BGLAP	PMP2
CCL2	AVPR1B
CCL3	RBP2
CCL5	FABP9
CXCL6	FABP12
CXCL11	SFTPA1
CXCL5	SLC10A2
CX3CL1	RBP5
SDC1	NR0B2
SRR	FGF19
SELE	CHP1
SELP	NR1D1
NOD2	GIP
SFRP1	IL18
SGK1	ESRRA
SMYD3	RXRB
SKP2	NR2E3
BMP4	CDK4
SLC6A1	PGRMC2
SLC6A4	DDX17
BMP7	MALT1
SLC11A1	IL24
SLC34A1	UCN3
SLIT3	ADCYAP1R1
SLPI	CCR5
SNAI2	CCR7
SMARCA4	CREB1
DDRGK1	DEFB104A
SMARCD1	MAPK14
SMO	CSF2
SOD2	CSF2RB
SOX9	CCN2
SOX10	IL23R
SPI1	CX3CR1
SPRR2A	CYBB
BPI	DAXX
SRC	DEFA1
SRD5A1	DEFA5
SRD5A2	DEFA6
BRCA1	NR0B1
SST	EGFR
SSTR1	EPO
SSTR2	ESR1
SSTR3	ESR2
SSTR5	ESRRB
ZFP36L1	ESRRG
STAT3	F2R
ZFP36L2	PTK2B
STC1	FGFR2
STK11	DKK1
STXBP1	FLT3
ABCC8	FOS
ADAM17	DEFB114
TACR1	IL36RN
KLF9	MSTN
TACR3	GH1
TAF7	GHRHR
TAT	GHSR
TBX1	GIPR
TBX2	IL36B
TBXA2R	IL36A
TBXAS1	GNAI1
TCF21	GPI
PRDX2	NR3C1
TFAP4	CXCL1
NR2F2	CXCL2
TFPI	CXCL3
TFRC	GSK3B
TGFB1	HCK
TGFB2	HDAC1
TGFB3	HMGB1
TGFBR1	HSPA1A
TGFBR2	HSPA1B
THBD	HSPA8
THPO	IFNAR1
TIE1	IGF1R
TIMP4	IGF2R
TLR2	IL1RN
TLR4	CXCL8
NR2E1	IL10
TNFAIP3	IL10RA
TNFRSF1B	IL12A
C2	IL12B
NR2C1	IL12RB2
TRAF6	IL13
TSHB	IL15
DEFA1B	IDO1
TNFSF4	INHBB
TYMS	IRF3
TYR	AR
ACOD1	JAK2
UBE2L3	JUND
UBE3A	AREG
UCN	RHOA
UCP1	LTA
UCP2	LTF
UCP3	LYN
SCGB1A1	MICB
VCAM1	NR3C2
VDR	NEDD4
VIM	NFKBIB
WNT2	NODAL
WNT3	NOS1
WNT5A	OPRK1
WNT6	OPRL1
WNT7A	OPRM1
WNT7B	OXTR
WNT8A	DEFB104B
WNT8B	PAK1
WNT10B	IL22
WNT11	PCSK1
WNT9A	PENK
WNT9B	PF4V1
XRCC5	PGR
YES1	AVP
YWHAH	AVPR1A
ZFP36	PRKCA
ZNF35	MAPK1
CA9	MAPK3
MIR766	MAPK8
TRIM25	IL36G
LRP8	PTAFR
MAPKAPK3	PTGER1
DDX54	PTGER2
TNIP2	PTGER4
PAGR1	PTGFR
CDC73	PTH
UBA5	PTGS2
CALCR	HAMP
TNIP3	RARA
NR4A3	RARG
ZNF703	RELA
NCOA4	RORB
PDCD1LG2	RXRG
FOSL1	S100A7
FGF23	S100A9
CALM3	CCL2
KMT2D	CCL3
WNT5B	CCL5
PABPN1	CXCL6
CALR	CXCL11
OR51E2	CXCL5
LBH	CX3CL1
KIF18A	NOD2
CAMP	BMP4
KDM5D	BMP7
ARID1A	SLPI
FZD7	BPI
CASP1	SRC
CASP3	SST
CASP8	SSTR2
CASP9	SSTR5
WDR83	STAT3
LCOR	STC1
CASR	TACR1
TEAD2	PRDX2
IL1F10	NR2F2
CCDC62	TFRC
TRIM63	TGFB1
PPP1R9B	TGFB2
MGARP	TGFB3
ADTRP	TGFBR1
HAVCR2	TGFBR2
PAQR8	THPO
TRIM5	TLR2
KMO	TLR4
STC2	NR2E1
TP63	TNFAIP3
AKR1C3	TNFRSF1B
CBL	NR2C1
URI1	TSHB
ADAM15	DEFA1B
ADAM9	TNFSF4
RIPK2	UCN
TRIM24	VCAM1
CFLAR	VDR
ALDH1A2	VIM
CCNA2	WNT5A
BCL10	CALCR
FOXH1	FGF23
MBD2	CALR
WNT3A	CASP3
ACVR1	IL1F10
LACRT	TRIM5
PIAS2	STC2
CLDN1	CBL
TRIM41	BCL10
USP8	LACRT
LATS1	CD14
CNOT9	CD86
AIFM1	CCN1
MTDH	ANGPTL4
CD6	NR5A2
MAPKAPK2	HNF4A
CD14	INS
KLF4	NR1D2
TRIP4	OLR1
SLIT2	NFYA
KL	NFYB
CD80	NFYC
CD86	SP1
LY86	JAG1
HAND2	TNFRSF12A
ROCK2	PLAUR
LITAF	LGMN
CD38	CXCL16
AKAP12	S100A11
RNF14	ACTG1
CTR9	ANXA6
SAFB2	CD81
CD68	FGF1
ORMDL2	SOD1
TLCD3B	FABP5
ORMDL1	FGF2
ALOX12B	PIK3R2
SGPP2	PLA2G2A
SPHK1	PDGFRB
ACER1	IL6
ASAH1	MIF
ACER3	SPP1
ASAH2	THBS1
ASAH2B	FABP4
SGPL1	APOD
CERKL	AGTR1
A3GALT2	RETN
GBGT1	CRABP2
ST3GAL2	AQP9
ST3GAL4	RORA
B3GALT1	FGFR4
FUT9	CXCL13
CERS1	ADM
DEGS2	CLDN4
CYP4F22	CSF3
CSNK1G2	CTSG
PPM1L	DEFA3
SPTSSB	DEFA4
SPTSSA	EDNRB
HACD2	ELANE
CERS3	A2M
ALDH3B1	ENG
ALDH3B2	FGF10
SIRT3	KLRK1
PRKD3	GHR
FUT6	IL37
KDSR	GNRH1
CERS6	GPER1
ST6GALNAC3	NR4A1
PRKD2	CXCL10
ST6GALNAC4	MDK
ST8SIA5	CXCL9
CERS2	MPO
ST6GALNAC6	PF4
ST8SIA6	PPBP
CCN1	S100A14
HACD4	ACTA1
P2RX1	RORC
ST8SIA3	S100A8
SCCPDH	SDC1
HACD3	SLC11A1
A4GALT	SSTR1
ELOVL2	TIE1
SPTLC3	NR4A3
PRKD1	CAMP
ALOXE3	SLIT2
ELOVL5	KL
GAL3ST2	TNFRSF21
ST3GAL1	SEMA3B
ELOVL1	VIPR1
ST3GAL3	S1PR1
ST8SIA1	TEK
ELOVL4	CBLC
UGT8	S100A12
ST8SIA4	CCL14
ELOVL6	PSMC1
FA2H	LGR4
CERS4	VEGFD
GAL3ST4	BIRC5
ELOVL7	AGER
ST8SIA2	GDF10
ST6GALNAC5	PIK3R5
ELOVL3	HNF4G
B3GNT5	ADRB1
DEGS1	LCN10
B4GALT4	MAP3K8
B4GALT3	IL11RA
B3GALT4	IL16
B3GALT2	ACKR1
ST3GAL5	ADRB2
GAL3ST3	WFDC2
CERS5	F2RL1
HACD1	OAS1
LARGE1	PTX3
B4GALT6	TGFA
B4GALT5	HGF
TM9SF2	IL7R
PPT1	PRTN3
GBA2	ZAP70
NEU3	IL1R2
ZPBP2	BMP3
NEU4	CXCL17
FUCA1	CHIT1
GALC	BPIFB2
GLA	CCL20
HEXA	ILK
MGST2	IFI30
NAGA	ACVRL1
NEU1	NPFF
NEU2	TNFRSF6B
GBA3	DES
CERK	ICAM2
ST3GAL6	LAT
FUT2	CSRP1
FUT3	PTH1R
FUT5	NPR1
FUT7	TGFBR3
SUMF1	FGR
ITGB8	GPR17
KIT	LILRB3
FADS3	SERPINA3
CLN6	IL1RL1
PPP2CA	SEMA6A
PPP2R1A	IL18R1
BAX	LTBP4
SFTPB	IL18RAP
PSAPL1	ANGPTL1
NSMAF	VIP
B3GALNT1	FLT3LG
TECR	IRF9
ANGPTL8	FLT4
ACOX1	SEMA3G
ANGPTL4	ADM2
MED13	CDH1
EPHX2	CXCR1
CD24	MMP12
CEBPA	CSF3R
C1QTNF3	LCN6
TLCD1	ANGPT1
ACSM1	TNFRSF14
ACSM2A	PROK2
OR10J5	CALCRL
ADORA1	LCNL1
TLCD4	APOBEC3A
DDX3X	TNFSF13
MTLN	CMTM2
RALY	PGLYRP1
ATP13A2	FCGR3B
MTCH2	RAC3
NR5A2	CNTFR
ZBTB20	FGFR1
GCKR	ROBO3
TMEM97	PTGDS
COMMD9	DUOX1
MYLIP	MASP1
ACACA	AKT3
HNF4A	KLRC4
MALRD1	PDGFRA
INS	TINAGL1
ITGB6	IGF1
LRP5	CCL23
MIR132	ELN
MIR208A	CD79A
MIR379	CLEC4M
MLXIPL	CXCR2
CYP39A1	CXCR3
TM6SF2	GREM1
POLD1	CR2
ACOXL	NPPA
PRKAA2	MET
RTN4	FGF7
ADCK1	TNFRSF17
RCN3	HTR3C
ACSM3	C5AR1
THADA	HTR3A
FUNDC2	AZU1
MIR590	S100A2
TLCD2	TPM2
USF1	AHNAK
USF2	CCL22
CNBP	FPR1
MALL	OGN
HPS6	PROC
TLCD3A	SHC2
ACOX2	ISG15
ACOX3	HBEGF
SESN2	FPR2
LRP5L	PAEP
HDAC9	PDGFRL
NR1D2	S100A3
ATG7	PLAU
WDR45	CD1A
ZDHHC19	FAM3B
ZDHHC15	CXCL14
RAB3GAP1	BPIFA2
ZDHHC17	MMP9
ZDHHC20	GNLY
ZDHHC24	BPIFA1
ZDHHC23	S100P
RAB3GAP2	MUC4
SVIP	LCN2
ZDHHC5	FGA
CLIP3
WIPI2
GLUL
ZDHHC22
RABL3
ZDHHC1
ZDHHC21
GOLGA7B
NMT1
ZDHHC9
GOLGA7
ZDHHC2
ZDHHC3
ZDHHC13
PPM1A
PPM1B
ATG16L1
WIPI1
ZDHHC4
ZDHHC7
HHAT
WDR45B
HHATL
SELENOK
ATG101
MBOAT4
ZDHHC6
PORCN
ZDHHC11B
ZDHHC14
ZDHHC11
MAP6D1
ATG10
ULK1
ZDHHC18
ZDHHC16
ZDHHC12
ATG16L2
ATG12
NMT2
ATG5
ATG13
RB1CC1
LYPLA1
LYPLAL1
NOTUM
CTSD
ABHD17B
ABHD10
ABHD17C
ABHD17A
ABHD13
OLR1
SAMD1
MED6
MED16
CDK8
PPARGC1A
GLIPR1
MED8
PDCD6-AHRR
CREBBP
ALAS1
MED19
FHL2
NCOA6
RGL1
SIN3B
MED13L
SIN3A
TIAM2
TNFRSF21
MED4
GRHL1
HMGCR
ACADM
MED11
ARNT
ME1
MTF1
NFYA
NFYB
NFYC
NPAS2
NRF1
G0S2
MED31
MED15
UGT1A9
MED18
MED9
MED29
AHRR
TRIB3
SMARCD3
SP1
SULT2A1
MED22
TBL1X
TXNRD1
CHD9
MED28
MED25
MED10
FAM120B
HELZ2
NCOA1
PEX11A
HDAC3
CCNC
MED30
MED14
MED21
MED23
MED17
MED26
MED27
MED7
MED20
TGS1
MED24
ARNT2
THRAP3
MED12
PAFAH1B2
PAFAH1B3
PAFAH2
AGPS
JMJD7-PLA2G4B
B4GALNT2
ABO
GLT6D1
SLC35C1
HSD17B13
DHCR7
CYP51A1
LSS
NSDHL
SC5D
EBP
ACAT2
HSD17B7
TM7SF2
PNRC1
MAL2
NIBAN1
ANTXR2
ADH4
CPEB2
JAG1
ECH1
ALCAM
FASN
ATF5
ALDOC
ETHE1
FBXO6
GSTM2
GUSB
ANXA5
ANXA13
LGALS3
ATF3
NFIL3
GPX8
TNFRSF12A
PLAUR
ACSS2
LGMN
CXCL16
S100A11
ATXN2
STX5
ACTG1
SEMA3B
CBS
CD9
FADS2
TP53INP1
ERLIN1
ERLIN2
PROM2
ANXA6
SIDT1
SULT2B1
SYP
VDAC1
VDAC2
STARD3NL
PROM1
CD81
FGF1
SCAP
FMO5
SEC14L2
ACADL
ACADVL
MBTPS2
SOD1
MBTPS1
MSMO1
DHCR24
LBR
