# Supplementary material for: A novel signature incorporating genes related to lipid metabolism and immune for prognostic and functional prediction of breast cancer
Source: Aging (Albany NY). 2024 May 20;16(10):8611–29. doi: 10.18632/aging.205828 (PMC11164511; doi:10.18632/aging.205828)
Supplement: Supplementary Table 3 [file aging-16-205828-s003.xlsx]

## Sheet: Supplementary Table 3
Supplementary Table 3. Genes associated with lipid metabolism and immunity.
symbol
C3
PDGFA
FGF2
PIK3R1
PIK3R2
SOCS3
CETP
PLA2G2A
PLAAT4
GALR2
CAT
PPARG
PPARA
LEP
AGT
IL6
EDN1
INHBA
MIF
BMP6
SPP1
RBP4
ADIPOQ
FABP4
RBP1
APOD
ACVR1C
IKBKE
GDF9
GAL
RETN
RBP7
CRABP1
CRABP2
EGF
FABP6
LRP1
NMB
PLTP
RBP2
SFTPA1
FGFR4
IL18
CXCL13
IL24
ADCYAP1R1
CCR7
ADM
CSF3
CTSG
CX3CR1
EDNRB
EGFR
ELANE
A2M
EPO
ESR1
ESR2
ESRRB
1
FLT3
FOS
IL36RN
MSTN
GHR
IL37
GNAI1
NR3C1
CXCL2
CXCL3
NR4A1
IL12B
IL12RB2
IL13
IDO1
INHBB
CXCL10
LTA
MDK
MICB
CXCL9
NR3C2
MPO
NODAL
NOS1
OPRK1
OXTR
PCSK1
PENK
PPBP
AVPR1A
PRKCA
PTGER4
PTGFR
S100A14
PTGS2
ACTA1
RARA
RORB
RXRG
S100A7
S100A8
S100A9
CCL2
CCL5
CXCL11
CX3CL1
SDC1
NOD2
SLC11A1
SSTR1
SSTR2
TACR1
TFRC
TGFBR2
THPO
TIE1
TLR4
TNFSF4
UCN
VIM
CALCR
NR4A3
CALR
CAMP
SLIT2
KL
CCN1
ANGPTL4
NR5A2
HNF4A
OLR1
TNFRSF12A
PLAUR
S100A11
FGF1
