# Supplementary material for: A novel signature incorporating genes related to lipid metabolism and immune for prognostic and functional prediction of breast cancer
Source: Aging (Albany NY). 2024 May 20;16(10):8611–29. doi: 10.18632/aging.205828 (PMC11164511; doi:10.18632/aging.205828)
Supplement: Supplementary Table 4 [file aging-16-205828-s004.xls]

## Sheet: Sample Setup
Supplementary Table 4. Raw result from RT-PCR.
Block Type	384-Well Block
Calibration Background is expired	No
Calibration Background performed on	11-14-2023
Calibration Pure Dye ABY is expired	No
Calibration Pure Dye ABY performed on	11-14-2023
Calibration Pure Dye CY5 is expired	No
Calibration Pure Dye CY5 performed on	11-14-2023
Calibration Pure Dye FAM is expired	No
Calibration Pure Dye FAM performed on	11-14-2023
Calibration Pure Dye JUN is expired	No
Calibration Pure Dye JUN performed on	11-14-2023
Calibration Pure Dye MUSTANG PURPLE is expired	No
Calibration Pure Dye MUSTANG PURPLE performed on	11-14-2023
Calibration Pure Dye NED is expired	No
Calibration Pure Dye NED performed on	11-14-2023
Calibration Pure Dye ROX is expired	No
Calibration Pure Dye ROX performed on	11-14-2023
Calibration Pure Dye SYBR is expired	No
Calibration Pure Dye SYBR performed on	11-14-2023
Calibration Pure Dye TAMRA is expired	No
Calibration Pure Dye TAMRA performed on	11-14-2023
Calibration Pure Dye VIC is expired	No
Calibration Pure Dye VIC performed on	11-14-2023
Calibration ROI is expired	No
Calibration ROI performed on	11-14-2023
Calibration Uniformity is expired	No
Calibration Uniformity performed on	11-14-2023
Chemistry	SYBR_GREEN
Date Created	2023-11-14 18:09:53 PM CST
Experiment Barcode
Experiment Comment
Experiment File Name	E:\2023-1114_103838.eds
Experiment Name	2023-06-15_103838
Experiment Run End Time	2023-11-14 17:54:31 PM CST
Experiment Type	Standard Curve
Instrument Name	272530883
Instrument Serial Number	272530883
Instrument Type	QuantStudio™ 5 System
Passive Reference	ROX
Post-read Stage/Step
Pre-read Stage/Step
Quantification Cycle Method	Ct
Signal Smoothing On	true
Stage where Melt Analysis is performed	Stage3
Stage/ Cycle where Ct Analysis is performed	Stage2, Step2
User Name
Well	Well Position	Sample Name	Sample Color	Biogroup Name	Biogroup Color	Target Name	Target Color	Task	Reporter	Quencher	Quantity	Comments
1	A1	Sample 1	RGB(176,23,31)			Target 1	RGB(176,23,31)	UNKNOWN	SYBR	None
2	A2	Sample 1	RGB(176,23,31)			Target 1	RGB(176,23,31)	UNKNOWN	SYBR	None
3	A3	Sample 1	RGB(176,23,31)			Target 1	RGB(176,23,31)	UNKNOWN	SYBR	None
4	A4	Sample 1	RGB(176,23,31)			Target 1	RGB(176,23,31)	UNKNOWN	SYBR	None
5	A5	Sample 1	RGB(176,23,31)			Target 1	RGB(176,23,31)	UNKNOWN	SYBR	None
6	A6	Sample 1	RGB(176,23,31)			Target 1	RGB(176,23,31)	UNKNOWN	SYBR	None
7	A7	Sample 1	RGB(176,23,31)			Target 1	RGB(176,23,31)	UNKNOWN	SYBR	None
8	A8	Sample 1	RGB(176,23,31)			Target 1	RGB(176,23,31)	UNKNOWN	SYBR	None
9	A9	Sample 1	RGB(176,23,31)			Target 1	RGB(176,23,31)	UNKNOWN	SYBR	None
10	A10	Sample 1	RGB(176,23,31)			Target 1	RGB(176,23,31)	UNKNOWN	SYBR	None
11	A11	Sample 1	RGB(176,23,31)			Target 1	RGB(176,23,31)	UNKNOWN	SYBR	None
12	A12	Sample 1	RGB(176,23,31)			Target 1	RGB(176,23,31)	UNKNOWN	SYBR	None
13	A13	Sample 1	RGB(176,23,31)			Target 1	RGB(176,23,31)	UNKNOWN	SYBR	None
14	A14	Sample 1	RGB(176,23,31)			Target 1	RGB(176,23,31)	UNKNOWN	SYBR	None
15	A15	Sample 1	RGB(176,23,31)			Target 1	RGB(176,23,31)	UNKNOWN	SYBR	None
16	A16	Sample 1	RGB(176,23,31)			Target 1	RGB(176,23,31)	UNKNOWN	SYBR	None
17	A17	Sample 1	RGB(176,23,31)			Target 1	RGB(176,23,31)	UNKNOWN	SYBR	None
18	A18	Sample 1	RGB(176,23,31)			Target 1	RGB(176,23,31)	UNKNOWN	SYBR	None
19	A19	Sample 1	RGB(176,23,31)			Target 1	RGB(176,23,31)	UNKNOWN	SYBR	None
20	A20	Sample 1	RGB(176,23,31)			Target 1	RGB(176,23,31)	UNKNOWN	SYBR	None
21	A21	Sample 1	RGB(176,23,31)			Target 1	RGB(176,23,31)	UNKNOWN	SYBR	None
22	A22	Sample 1	RGB(176,23,31)			Target 1	RGB(176,23,31)	UNKNOWN	SYBR	None
23	A23	Sample 1	RGB(176,23,31)			Target 1	RGB(176,23,31)	UNKNOWN	SYBR	None
24	A24	Sample 1	RGB(176,23,31)			Target 1	RGB(176,23,31)	UNKNOWN	SYBR	None
25	B1	Sample 1	RGB(176,23,31)			Target 1	RGB(176,23,31)	UNKNOWN	SYBR	None
26	B2	Sample 1	RGB(176,23,31)			Target 1	RGB(176,23,31)	UNKNOWN	SYBR	None
27	B3	Sample 1	RGB(176,23,31)			Target 1	RGB(176,23,31)	UNKNOWN	SYBR	None
28	B4	Sample 1	RGB(176,23,31)			Target 1	RGB(176,23,31)	UNKNOWN	SYBR	None
29	B5	Sample 1	RGB(176,23,31)			Target 1	RGB(176,23,31)	UNKNOWN	SYBR	None
30	B6	Sample 1	RGB(176,23,31)			Target 1	RGB(176,23,31)	UNKNOWN	SYBR	None
31	B7	Sample 1	RGB(176,23,31)			Target 1	RGB(176,23,31)	UNKNOWN	SYBR	None
32	B8	Sample 1	RGB(176,23,31)			Target 1	RGB(176,23,31)	UNKNOWN	SYBR	None
33	B9	Sample 1	RGB(176,23,31)			Target 1	RGB(176,23,31)	UNKNOWN	SYBR	None
34	B10	Sample 1	RGB(176,23,31)			Target 1	RGB(176,23,31)	UNKNOWN	SYBR	None
35	B11	Sample 1	RGB(176,23,31)			Target 1	RGB(176,23,31)	UNKNOWN	SYBR	None
36	B12	Sample 1	RGB(176,23,31)			Target 1	RGB(176,23,31)	UNKNOWN	SYBR	None
37	B13	Sample 1	RGB(176,23,31)			Target 1	RGB(176,23,31)	UNKNOWN	SYBR	None
38	B14	Sample 1	RGB(176,23,31)			Target 1	RGB(176,23,31)	UNKNOWN	SYBR	None
39	B15	Sample 1	RGB(176,23,31)			Target 1	RGB(176,23,31)	UNKNOWN	SYBR	None
40	B16	Sample 1	RGB(176,23,31)			Target 1	RGB(176,23,31)	UNKNOWN	SYBR	None
41	B17	Sample 1	RGB(176,23,31)			Target 1	RGB(176,23,31)	UNKNOWN	SYBR	None
42	B18	Sample 1	RGB(176,23,31)			Target 1	RGB(176,23,31)	UNKNOWN	SYBR	None
43	B19	Sample 1	RGB(176,23,31)			Target 1	RGB(176,23,31)	UNKNOWN	SYBR	None
44	B20	Sample 1	RGB(176,23,31)			Target 1	RGB(176,23,31)	UNKNOWN	SYBR	None
45	B21	Sample 1	RGB(176,23,31)			Target 1	RGB(176,23,31)	UNKNOWN	SYBR	None
46	B22	Sample 1	RGB(176,23,31)			Target 1	RGB(176,23,31)	UNKNOWN	SYBR	None
47	B23	Sample 1	RGB(176,23,31)			Target 1	RGB(176,23,31)	UNKNOWN	SYBR	None
48	B24	Sample 1	RGB(176,23,31)			Target 1	RGB(176,23,31)	UNKNOWN	SYBR	None
49	C1	Sample 1	RGB(176,23,31)			Target 1	RGB(176,23,31)	UNKNOWN	SYBR	None
50	C2	Sample 1	RGB(176,23,31)			Target 1	RGB(176,23,31)	UNKNOWN	SYBR	None
51	C3	Sample 1	RGB(176,23,31)			Target 1	RGB(176,23,31)	UNKNOWN	SYBR	None
52	C4	Sample 1	RGB(176,23,31)			Target 1	RGB(176,23,31)	UNKNOWN	SYBR	None
53	C5	Sample 1	RGB(176,23,31)			Target 1	RGB(176,23,31)	UNKNOWN	SYBR	None
54	C6	Sample 1	RGB(176,23,31)			Target 1	RGB(176,23,31)	UNKNOWN	SYBR	None
55	C7	Sample 1	RGB(176,23,31)			Target 1	RGB(176,23,31)	UNKNOWN	SYBR	None
56	C8	Sample 1	RGB(176,23,31)			Target 1	RGB(176,23,31)	UNKNOWN	SYBR	None
57	C9	Sample 1	RGB(176,23,31)			Target 1	RGB(176,23,31)	UNKNOWN	SYBR	None
58	C10	Sample 1	RGB(176,23,31)			Target 1	RGB(176,23,31)	UNKNOWN	SYBR	None
59	C11	Sample 1	RGB(176,23,31)			Target 1	RGB(176,23,31)	UNKNOWN	SYBR	None
60	C12	Sample 1	RGB(176,23,31)			Target 1	RGB(176,23,31)	UNKNOWN	SYBR	None
61	C13	Sample 1	RGB(176,23,31)			Target 1	RGB(176,23,31)	UNKNOWN	SYBR	None
62	C14	Sample 1	RGB(176,23,31)			Target 1	RGB(176,23,31)	UNKNOWN	SYBR	None
63	C15	Sample 1	RGB(176,23,31)			Target 1	RGB(176,23,31)	UNKNOWN	SYBR	None
64	C16	Sample 1	RGB(176,23,31)			Target 1	RGB(176,23,31)	UNKNOWN	SYBR	None
65	C17	Sample 1	RGB(176,23,31)			Target 1	RGB(176,23,31)	UNKNOWN	SYBR	None
66	C18	Sample 1	RGB(176,23,31)			Target 1	RGB(176,23,31)	UNKNOWN	SYBR	None
67	C19	Sample 1	RGB(176,23,31)			Target 1	RGB(176,23,31)	UNKNOWN	SYBR	None
68	C20	Sample 1	RGB(176,23,31)			Target 1	RGB(176,23,31)	UNKNOWN	SYBR	None
69	C21	Sample 1	RGB(176,23,31)			Target 1	RGB(176,23,31)	UNKNOWN	SYBR	None
70	C22	Sample 1	RGB(176,23,31)			Target 1	RGB(176,23,31)	UNKNOWN	SYBR	None
71	C23	Sample 1	RGB(176,23,31)			Target 1	RGB(176,23,31)	UNKNOWN	SYBR	None
72	C24	Sample 1	RGB(176,23,31)			Target 1	RGB(176,23,31)	UNKNOWN	SYBR	None
73	D1	Sample 1	RGB(176,23,31)			Target 1	RGB(176,23,31)	UNKNOWN	SYBR	None
74	D2	Sample 1	RGB(176,23,31)			Target 1	RGB(176,23,31)	UNKNOWN	SYBR	None
75	D3	Sample 1	RGB(176,23,31)			Target 1	RGB(176,23,31)	UNKNOWN	SYBR	None
76	D4	Sample 1	RGB(176,23,31)			Target 1	RGB(176,23,31)	UNKNOWN	SYBR	None
77	D5	Sample 1	RGB(176,23,31)			Target 1	RGB(176,23,31)	UNKNOWN	SYBR	None
78	D6	Sample 1	RGB(176,23,31)			Target 1	RGB(176,23,31)	UNKNOWN	SYBR	None
79	D7	Sample 1	RGB(176,23,31)			Target 1	RGB(176,23,31)	UNKNOWN	SYBR	None
80	D8	Sample 1	RGB(176,23,31)			Target 1	RGB(176,23,31)	UNKNOWN	SYBR	None
81	D9	Sample 1	RGB(176,23,31)			Target 1	RGB(176,23,31)	UNKNOWN	SYBR	None
82	D10	Sample 1	RGB(176,23,31)			Target 1	RGB(176,23,31)	UNKNOWN	SYBR	None
83	D11	Sample 1	RGB(176,23,31)			Target 1	RGB(176,23,31)	UNKNOWN	SYBR	None
84	D12	Sample 1	RGB(176,23,31)			Target 1	RGB(176,23,31)	UNKNOWN	SYBR	None
85	D13	Sample 1	RGB(176,23,31)			Target 1	RGB(176,23,31)	UNKNOWN	SYBR	None
86	D14	Sample 1	RGB(176,23,31)			Target 1	RGB(176,23,31)	UNKNOWN	SYBR	None
87	D15	Sample 1	RGB(176,23,31)			Target 1	RGB(176,23,31)	UNKNOWN	SYBR	None
88	D16	Sample 1	RGB(176,23,31)			Target 1	RGB(176,23,31)	UNKNOWN	SYBR	None
89	D17	Sample 1	RGB(176,23,31)			Target 1	RGB(176,23,31)	UNKNOWN	SYBR	None
90	D18	Sample 1	RGB(176,23,31)			Target 1	RGB(176,23,31)	UNKNOWN	SYBR	None
91	D19	Sample 1	RGB(176,23,31)			Target 1	RGB(176,23,31)	UNKNOWN	SYBR	None
92	D20	Sample 1	RGB(176,23,31)			Target 1	RGB(176,23,31)	UNKNOWN	SYBR	None
93	D21	Sample 1	RGB(176,23,31)			Target 1	RGB(176,23,31)	UNKNOWN	SYBR	None
94	D22	Sample 1	RGB(176,23,31)			Target 1	RGB(176,23,31)	UNKNOWN	SYBR	None
95	D23	Sample 1	RGB(176,23,31)			Target 1	RGB(176,23,31)	UNKNOWN	SYBR	None
96	D24	Sample 1	RGB(176,23,31)			Target 1	RGB(176,23,31)	UNKNOWN	SYBR	None
97	E1	Sample 1	RGB(176,23,31)			Target 1	RGB(176,23,31)	UNKNOWN	SYBR	None
98	E2	Sample 1	RGB(176,23,31)			Target 1	RGB(176,23,31)	UNKNOWN	SYBR	None
99	E3	Sample 1	RGB(176,23,31)			Target 1	RGB(176,23,31)	UNKNOWN	SYBR	None
100	E4	Sample 1	RGB(176,23,31)			Target 1	RGB(176,23,31)	UNKNOWN	SYBR	None
101	E5	Sample 1	RGB(176,23,31)			Target 1	RGB(176,23,31)	UNKNOWN	SYBR	None
102	E6	Sample 1	RGB(176,23,31)			Target 1	RGB(176,23,31)	UNKNOWN	SYBR	None
103	E7	Sample 1	RGB(176,23,31)			Target 1	RGB(176,23,31)	UNKNOWN	SYBR	None
104	E8	Sample 1	RGB(176,23,31)			Target 1	RGB(176,23,31)	UNKNOWN	SYBR	None
105	E9	Sample 1	RGB(176,23,31)			Target 1	RGB(176,23,31)	UNKNOWN	SYBR	None
106	E10	Sample 1	RGB(176,23,31)			Target 1	RGB(176,23,31)	UNKNOWN	SYBR	None
107	E11	Sample 1	RGB(176,23,31)			Target 1	RGB(176,23,31)	UNKNOWN	SYBR	None
108	E12	Sample 1	RGB(176,23,31)			Target 1	RGB(176,23,31)	UNKNOWN	SYBR	None
109	E13	Sample 1	RGB(176,23,31)			Target 1	RGB(176,23,31)	UNKNOWN	SYBR	None
110	E14	Sample 1	RGB(176,23,31)			Target 1	RGB(176,23,31)	UNKNOWN	SYBR	None
111	E15	Sample 1	RGB(176,23,31)			Target 1	RGB(176,23,31)	UNKNOWN	SYBR	None
112	E16	Sample 1	RGB(176,23,31)			Target 1	RGB(176,23,31)	UNKNOWN	SYBR	None
113	E17	Sample 1	RGB(176,23,31)			Target 1	RGB(176,23,31)	UNKNOWN	SYBR	None
114	E18	Sample 1	RGB(176,23,31)			Target 1	RGB(176,23,31)	UNKNOWN	SYBR	None
115	E19	Sample 1	RGB(176,23,31)			Target 1	RGB(176,23,31)	UNKNOWN	SYBR	None
116	E20	Sample 1	RGB(176,23,31)			Target 1	RGB(176,23,31)	UNKNOWN	SYBR	None
117	E21	Sample 1	RGB(176,23,31)			Target 1	RGB(176,23,31)	UNKNOWN	SYBR	None
118	E22	Sample 1	RGB(176,23,31)			Target 1	RGB(176,23,31)	UNKNOWN	SYBR	None
119	E23	Sample 1	RGB(176,23,31)			Target 1	RGB(176,23,31)	UNKNOWN	SYBR	None
120	E24	Sample 1	RGB(176,23,31)			Target 1	RGB(176,23,31)	UNKNOWN	SYBR	None
121	F1	Sample 1	RGB(176,23,31)			Target 1	RGB(176,23,31)	UNKNOWN	SYBR	None
122	F2	Sample 1	RGB(176,23,31)			Target 1	RGB(176,23,31)	UNKNOWN	SYBR	None
123	F3	Sample 1	RGB(176,23,31)			Target 1	RGB(176,23,31)	UNKNOWN	SYBR	None
124	F4	Sample 1	RGB(176,23,31)			Target 1	RGB(176,23,31)	UNKNOWN	SYBR	None
125	F5	Sample 1	RGB(176,23,31)			Target 1	RGB(176,23,31)	UNKNOWN	SYBR	None
126	F6	Sample 1	RGB(176,23,31)			Target 1	RGB(176,23,31)	UNKNOWN	SYBR	None
127	F7	Sample 1	RGB(176,23,31)			Target 1	RGB(176,23,31)	UNKNOWN	SYBR	None
128	F8	Sample 1	RGB(176,23,31)			Target 1	RGB(176,23,31)	UNKNOWN	SYBR	None
129	F9	Sample 1	RGB(176,23,31)			Target 1	RGB(176,23,31)	UNKNOWN	SYBR	None
130	F10	Sample 1	RGB(176,23,31)			Target 1	RGB(176,23,31)	UNKNOWN	SYBR	None
131	F11	Sample 1	RGB(176,23,31)			Target 1	RGB(176,23,31)	UNKNOWN	SYBR	None
132	F12	Sample 1	RGB(176,23,31)			Target 1	RGB(176,23,31)	UNKNOWN	SYBR	None
133	F13	Sample 1	RGB(176,23,31)			Target 1	RGB(176,23,31)	UNKNOWN	SYBR	None
134	F14	Sample 1	RGB(176,23,31)			Target 1	RGB(176,23,31)	UNKNOWN	SYBR	None
135	F15	Sample 1	RGB(176,23,31)			Target 1	RGB(176,23,31)	UNKNOWN	SYBR	None
136	F16	Sample 1	RGB(176,23,31)			Target 1	RGB(176,23,31)	UNKNOWN	SYBR	None
137	F17	Sample 1	RGB(176,23,31)			Target 1	RGB(176,23,31)	UNKNOWN	SYBR	None
138	F18	Sample 1	RGB(176,23,31)			Target 1	RGB(176,23,31)	UNKNOWN	SYBR	None
139	F19	Sample 1	RGB(176,23,31)			Target 1	RGB(176,23,31)	UNKNOWN	SYBR	None
140	F20	Sample 1	RGB(176,23,31)			Target 1	RGB(176,23,31)	UNKNOWN	SYBR	None
141	F21	Sample 1	RGB(176,23,31)			Target 1	RGB(176,23,31)	UNKNOWN	SYBR	None
142	F22	Sample 1	RGB(176,23,31)			Target 1	RGB(176,23,31)	UNKNOWN	SYBR	None
143	F23	Sample 1	RGB(176,23,31)			Target 1	RGB(176,23,31)	UNKNOWN	SYBR	None
144	F24	Sample 1	RGB(176,23,31)			Target 1	RGB(176,23,31)	UNKNOWN	SYBR	None
145	G1	Sample 1	RGB(176,23,31)			Target 1	RGB(176,23,31)	UNKNOWN	SYBR	None
146	G2	Sample 1	RGB(176,23,31)			Target 1	RGB(176,23,31)	UNKNOWN	SYBR	None
147	G3	Sample 1	RGB(176,23,31)			Target 1	RGB(176,23,31)	UNKNOWN	SYBR	None
148	G4	Sample 1	RGB(176,23,31)			Target 1	RGB(176,23,31)	UNKNOWN	SYBR	None
149	G5	Sample 1	RGB(176,23,31)			Target 1	RGB(176,23,31)	UNKNOWN	SYBR	None
150	G6	Sample 1	RGB(176,23,31)			Target 1	RGB(176,23,31)	UNKNOWN	SYBR	None
151	G7	Sample 1	RGB(176,23,31)			Target 1	RGB(176,23,31)	UNKNOWN	SYBR	None
152	G8	Sample 1	RGB(176,23,31)			Target 1	RGB(176,23,31)	UNKNOWN	SYBR	None
153	G9	Sample 1	RGB(176,23,31)			Target 1	RGB(176,23,31)	UNKNOWN	SYBR	None
154	G10	Sample 1	RGB(176,23,31)			Target 1	RGB(176,23,31)	UNKNOWN	SYBR	None
155	G11	Sample 1	RGB(176,23,31)			Target 1	RGB(176,23,31)	UNKNOWN	SYBR	None
156	G12	Sample 1	RGB(176,23,31)			Target 1	RGB(176,23,31)	UNKNOWN	SYBR	None
157	G13	Sample 1	RGB(176,23,31)			Target 1	RGB(176,23,31)	UNKNOWN	SYBR	None
158	G14	Sample 1	RGB(176,23,31)			Target 1	RGB(176,23,31)	UNKNOWN	SYBR	None
159	G15	Sample 1	RGB(176,23,31)			Target 1	RGB(176,23,31)	UNKNOWN	SYBR	None
160	G16	Sample 1	RGB(176,23,31)			Target 1	RGB(176,23,31)	UNKNOWN	SYBR	None
161	G17	Sample 1	RGB(176,23,31)			Target 1	RGB(176,23,31)	UNKNOWN	SYBR	None
162	G18	Sample 1	RGB(176,23,31)			Target 1	RGB(176,23,31)	UNKNOWN	SYBR	None
163	G19	Sample 1	RGB(176,23,31)			Target 1	RGB(176,23,31)	UNKNOWN	SYBR	None
164	G20	Sample 1	RGB(176,23,31)			Target 1	RGB(176,23,31)	UNKNOWN	SYBR	None
165	G21	Sample 1	RGB(176,23,31)			Target 1	RGB(176,23,31)	UNKNOWN	SYBR	None
166	G22	Sample 1	RGB(176,23,31)			Target 1	RGB(176,23,31)	UNKNOWN	SYBR	None
167	G23	Sample 1	RGB(176,23,31)			Target 1	RGB(176,23,31)	UNKNOWN	SYBR	None
168	G24	Sample 1	RGB(176,23,31)			Target 1	RGB(176,23,31)	UNKNOWN	SYBR	None
169	H1	Sample 1	RGB(176,23,31)			Target 1	RGB(176,23,31)	UNKNOWN	SYBR	None
170	H2	Sample 1	RGB(176,23,31)			Target 1	RGB(176,23,31)	UNKNOWN	SYBR	None
171	H3	Sample 1	RGB(176,23,31)			Target 1	RGB(176,23,31)	UNKNOWN	SYBR	None
172	H4	Sample 1	RGB(176,23,31)			Target 1	RGB(176,23,31)	UNKNOWN	SYBR	None
173	H5	Sample 1	RGB(176,23,31)			Target 1	RGB(176,23,31)	UNKNOWN	SYBR	None
174	H6	Sample 1	RGB(176,23,31)			Target 1	RGB(176,23,31)	UNKNOWN	SYBR	None
175	H7	Sample 1	RGB(176,23,31)			Target 1	RGB(176,23,31)	UNKNOWN	SYBR	None
176	H8	Sample 1	RGB(176,23,31)			Target 1	RGB(176,23,31)	UNKNOWN	SYBR	None
177	H9	Sample 1	RGB(176,23,31)			Target 1	RGB(176,23,31)	UNKNOWN	SYBR	None
178	H10	Sample 1	RGB(176,23,31)			Target 1	RGB(176,23,31)	UNKNOWN	SYBR	None
179	H11	Sample 1	RGB(176,23,31)			Target 1	RGB(176,23,31)	UNKNOWN	SYBR	None
180	H12	Sample 1	RGB(176,23,31)			Target 1	RGB(176,23,31)	UNKNOWN	SYBR	None
181	H13	Sample 1	RGB(176,23,31)			Target 1	RGB(176,23,31)	UNKNOWN	SYBR	None
182	H14	Sample 1	RGB(176,23,31)			Target 1	RGB(176,23,31)	UNKNOWN	SYBR	None
183	H15	Sample 1	RGB(176,23,31)			Target 1	RGB(176,23,31)	UNKNOWN	SYBR	None
184	H16	Sample 1	RGB(176,23,31)			Target 1	RGB(176,23,31)	UNKNOWN	SYBR	None
185	H17	Sample 1	RGB(176,23,31)			Target 1	RGB(176,23,31)	UNKNOWN	SYBR	None
186	H18	Sample 1	RGB(176,23,31)			Target 1	RGB(176,23,31)	UNKNOWN	SYBR	None
187	H19	Sample 1	RGB(176,23,31)			Target 1	RGB(176,23,31)	UNKNOWN	SYBR	None
188	H20	Sample 1	RGB(176,23,31)			Target 1	RGB(176,23,31)	UNKNOWN	SYBR	None
189	H21	Sample 1	RGB(176,23,31)			Target 1	RGB(176,23,31)	UNKNOWN	SYBR	None
190	H22	Sample 1	RGB(176,23,31)			Target 1	RGB(176,23,31)	UNKNOWN	SYBR	None
191	H23	Sample 1	RGB(176,23,31)			Target 1	RGB(176,23,31)	UNKNOWN	SYBR	None
192	H24	Sample 1	RGB(176,23,31)			Target 1	RGB(176,23,31)	UNKNOWN	SYBR	None
193	I1	Sample 1	RGB(176,23,31)			Target 1	RGB(176,23,31)	UNKNOWN	SYBR	None
194	I2	Sample 1	RGB(176,23,31)			Target 1	RGB(176,23,31)	UNKNOWN	SYBR	None
195	I3	Sample 1	RGB(176,23,31)			Target 1	RGB(176,23,31)	UNKNOWN	SYBR	None
196	I4	Sample 1	RGB(176,23,31)			Target 1	RGB(176,23,31)	UNKNOWN	SYBR	None
197	I5	Sample 1	RGB(176,23,31)			Target 1	RGB(176,23,31)	UNKNOWN	SYBR	None
198	I6	Sample 1	RGB(176,23,31)			Target 1	RGB(176,23,31)	UNKNOWN	SYBR	None
199	I7	Sample 1	RGB(176,23,31)			Target 1	RGB(176,23,31)	UNKNOWN	SYBR	None
200	I8	Sample 1	RGB(176,23,31)			Target 1	RGB(176,23,31)	UNKNOWN	SYBR	None
201	I9	Sample 1	RGB(176,23,31)			Target 1	RGB(176,23,31)	UNKNOWN	SYBR	None
202	I10	Sample 1	RGB(176,23,31)			Target 1	RGB(176,23,31)	UNKNOWN	SYBR	None
203	I11	Sample 1	RGB(176,23,31)			Target 1	RGB(176,23,31)	UNKNOWN	SYBR	None
204	I12	Sample 1	RGB(176,23,31)			Target 1	RGB(176,23,31)	UNKNOWN	SYBR	None
205	I13	Sample 1	RGB(176,23,31)			Target 1	RGB(176,23,31)	UNKNOWN	SYBR	None
206	I14	Sample 1	RGB(176,23,31)			Target 1	RGB(176,23,31)	UNKNOWN	SYBR	None
207	I15	Sample 1	RGB(176,23,31)			Target 1	RGB(176,23,31)	UNKNOWN	SYBR	None
208	I16	Sample 1	RGB(176,23,31)			Target 1	RGB(176,23,31)	UNKNOWN	SYBR	None
209	I17	Sample 1	RGB(176,23,31)			Target 1	RGB(176,23,31)	UNKNOWN	SYBR	None
210	I18	Sample 1	RGB(176,23,31)			Target 1	RGB(176,23,31)	UNKNOWN	SYBR	None
211	I19	Sample 1	RGB(176,23,31)			Target 1	RGB(176,23,31)	UNKNOWN	SYBR	None
212	I20	Sample 1	RGB(176,23,31)			Target 1	RGB(176,23,31)	UNKNOWN	SYBR	None
213	I21	Sample 1	RGB(176,23,31)			Target 1	RGB(176,23,31)	UNKNOWN	SYBR	None
214	I22	Sample 1	RGB(176,23,31)			Target 1	RGB(176,23,31)	UNKNOWN	SYBR	None
215	I23	Sample 1	RGB(176,23,31)			Target 1	RGB(176,23,31)	UNKNOWN	SYBR	None
216	I24	Sample 1	RGB(176,23,31)			Target 1	RGB(176,23,31)	UNKNOWN	SYBR	None
217	J1	Sample 1	RGB(176,23,31)			Target 1	RGB(176,23,31)	UNKNOWN	SYBR	None
218	J2	Sample 1	RGB(176,23,31)			Target 1	RGB(176,23,31)	UNKNOWN	SYBR	None
219	J3	Sample 1	RGB(176,23,31)			Target 1	RGB(176,23,31)	UNKNOWN	SYBR	None
220	J4	Sample 1	RGB(176,23,31)			Target 1	RGB(176,23,31)	UNKNOWN	SYBR	None
221	J5	Sample 1	RGB(176,23,31)			Target 1	RGB(176,23,31)	UNKNOWN	SYBR	None
222	J6	Sample 1	RGB(176,23,31)			Target 1	RGB(176,23,31)	UNKNOWN	SYBR	None
223	J7	Sample 1	RGB(176,23,31)			Target 1	RGB(176,23,31)	UNKNOWN	SYBR	None
224	J8	Sample 1	RGB(176,23,31)			Target 1	RGB(176,23,31)	UNKNOWN	SYBR	None
225	J9	Sample 1	RGB(176,23,31)			Target 1	RGB(176,23,31)	UNKNOWN	SYBR	None
226	J10	Sample 1	RGB(176,23,31)			Target 1	RGB(176,23,31)	UNKNOWN	SYBR	None
227	J11	Sample 1	RGB(176,23,31)			Target 1	RGB(176,23,31)	UNKNOWN	SYBR	None
228	J12	Sample 1	RGB(176,23,31)			Target 1	RGB(176,23,31)	UNKNOWN	SYBR	None
229	J13	Sample 1	RGB(176,23,31)			Target 1	RGB(176,23,31)	UNKNOWN	SYBR	None
230	J14	Sample 1	RGB(176,23,31)			Target 1	RGB(176,23,31)	UNKNOWN	SYBR	None
231	J15	Sample 1	RGB(176,23,31)			Target 1	RGB(176,23,31)	UNKNOWN	SYBR	None
232	J16	Sample 1	RGB(176,23,31)			Target 1	RGB(176,23,31)	UNKNOWN	SYBR	None
233	J17	Sample 1	RGB(176,23,31)			Target 1	RGB(176,23,31)	UNKNOWN	SYBR	None
234	J18	Sample 1	RGB(176,23,31)			Target 1	RGB(176,23,31)	UNKNOWN	SYBR	None
235	J19	Sample 1	RGB(176,23,31)			Target 1	RGB(176,23,31)	UNKNOWN	SYBR	None
236	J20	Sample 1	RGB(176,23,31)			Target 1	RGB(176,23,31)	UNKNOWN	SYBR	None
237	J21	Sample 1	RGB(176,23,31)			Target 1	RGB(176,23,31)	UNKNOWN	SYBR	None
238	J22	Sample 1	RGB(176,23,31)			Target 1	RGB(176,23,31)	UNKNOWN	SYBR	None
239	J23	Sample 1	RGB(176,23,31)			Target 1	RGB(176,23,31)	UNKNOWN	SYBR	None
240	J24	Sample 1	RGB(176,23,31)			Target 1	RGB(176,23,31)	UNKNOWN	SYBR	None
241	K1	Sample 1	RGB(176,23,31)			Target 1	RGB(176,23,31)	UNKNOWN	SYBR	None
242	K2	Sample 1	RGB(176,23,31)			Target 1	RGB(176,23,31)	UNKNOWN	SYBR	None
243	K3	Sample 1	RGB(176,23,31)			Target 1	RGB(176,23,31)	UNKNOWN	SYBR	None
244	K4	Sample 1	RGB(176,23,31)			Target 1	RGB(176,23,31)	UNKNOWN	SYBR	None
245	K5	Sample 1	RGB(176,23,31)			Target 1	RGB(176,23,31)	UNKNOWN	SYBR	None
246	K6	Sample 1	RGB(176,23,31)			Target 1	RGB(176,23,31)	UNKNOWN	SYBR	None
247	K7	Sample 1	RGB(176,23,31)			Target 1	RGB(176,23,31)	UNKNOWN	SYBR	None
248	K8	Sample 1	RGB(176,23,31)			Target 1	RGB(176,23,31)	UNKNOWN	SYBR	None
249	K9	Sample 1	RGB(176,23,31)			Target 1	RGB(176,23,31)	UNKNOWN	SYBR	None
250	K10	Sample 1	RGB(176,23,31)			Target 1	RGB(176,23,31)	UNKNOWN	SYBR	None
251	K11	Sample 1	RGB(176,23,31)			Target 1	RGB(176,23,31)	UNKNOWN	SYBR	None
252	K12	Sample 1	RGB(176,23,31)			Target 1	RGB(176,23,31)	UNKNOWN	SYBR	None
253	K13	Sample 1	RGB(176,23,31)			Target 1	RGB(176,23,31)	UNKNOWN	SYBR	None
254	K14	Sample 1	RGB(176,23,31)			Target 1	RGB(176,23,31)	UNKNOWN	SYBR	None
255	K15	Sample 1	RGB(176,23,31)			Target 1	RGB(176,23,31)	UNKNOWN	SYBR	None
256	K16	Sample 1	RGB(176,23,31)			Target 1	RGB(176,23,31)	UNKNOWN	SYBR	None
257	K17	Sample 1	RGB(176,23,31)			Target 1	RGB(176,23,31)	UNKNOWN	SYBR	None
258	K18	Sample 1	RGB(176,23,31)			Target 1	RGB(176,23,31)	UNKNOWN	SYBR	None
259	K19	Sample 1	RGB(176,23,31)			Target 1	RGB(176,23,31)	UNKNOWN	SYBR	None
260	K20	Sample 1	RGB(176,23,31)			Target 1	RGB(176,23,31)	UNKNOWN	SYBR	None
261	K21	Sample 1	RGB(176,23,31)			Target 1	RGB(176,23,31)	UNKNOWN	SYBR	None
262	K22	Sample 1	RGB(176,23,31)			Target 1	RGB(176,23,31)	UNKNOWN	SYBR	None
263	K23	Sample 1	RGB(176,23,31)			Target 1	RGB(176,23,31)	UNKNOWN	SYBR	None
264	K24	Sample 1	RGB(176,23,31)			Target 1	RGB(176,23,31)	UNKNOWN	SYBR	None
265	L1	Sample 1	RGB(176,23,31)			Target 1	RGB(176,23,31)	UNKNOWN	SYBR	None
266	L2	Sample 1	RGB(176,23,31)			Target 1	RGB(176,23,31)	UNKNOWN	SYBR	None
267	L3	Sample 1	RGB(176,23,31)			Target 1	RGB(176,23,31)	UNKNOWN	SYBR	None
268	L4	Sample 1	RGB(176,23,31)			Target 1	RGB(176,23,31)	UNKNOWN	SYBR	None
269	L5	Sample 1	RGB(176,23,31)			Target 1	RGB(176,23,31)	UNKNOWN	SYBR	None
270	L6	Sample 1	RGB(176,23,31)			Target 1	RGB(176,23,31)	UNKNOWN	SYBR	None
271	L7	Sample 1	RGB(176,23,31)			Target 1	RGB(176,23,31)	UNKNOWN	SYBR	None
272	L8	Sample 1	RGB(176,23,31)			Target 1	RGB(176,23,31)	UNKNOWN	SYBR	None
273	L9	Sample 1	RGB(176,23,31)			Target 1	RGB(176,23,31)	UNKNOWN	SYBR	None
274	L10	Sample 1	RGB(176,23,31)			Target 1	RGB(176,23,31)	UNKNOWN	SYBR	None
275	L11	Sample 1	RGB(176,23,31)			Target 1	RGB(176,23,31)	UNKNOWN	SYBR	None
276	L12	Sample 1	RGB(176,23,31)			Target 1	RGB(176,23,31)	UNKNOWN	SYBR	None
277	L13	Sample 1	RGB(176,23,31)			Target 1	RGB(176,23,31)	UNKNOWN	SYBR	None
278	L14	Sample 1	RGB(176,23,31)			Target 1	RGB(176,23,31)	UNKNOWN	SYBR	None
279	L15	Sample 1	RGB(176,23,31)			Target 1	RGB(176,23,31)	UNKNOWN	SYBR	None
280	L16	Sample 1	RGB(176,23,31)			Target 1	RGB(176,23,31)	UNKNOWN	SYBR	None
281	L17	Sample 1	RGB(176,23,31)			Target 1	RGB(176,23,31)	UNKNOWN	SYBR	None
282	L18	Sample 1	RGB(176,23,31)			Target 1	RGB(176,23,31)	UNKNOWN	SYBR	None
283	L19	Sample 1	RGB(176,23,31)			Target 1	RGB(176,23,31)	UNKNOWN	SYBR	None
284	L20	Sample 1	RGB(176,23,31)			Target 1	RGB(176,23,31)	UNKNOWN	SYBR	None
285	L21	Sample 1	RGB(176,23,31)			Target 1	RGB(176,23,31)	UNKNOWN	SYBR	None
286	L22	Sample 1	RGB(176,23,31)			Target 1	RGB(176,23,31)	UNKNOWN	SYBR	None
287	L23	Sample 1	RGB(176,23,31)			Target 1	RGB(176,23,31)	UNKNOWN	SYBR	None
288	L24	Sample 1	RGB(176,23,31)			Target 1	RGB(176,23,31)	UNKNOWN	SYBR	None
289	M1	Sample 1	RGB(176,23,31)			Target 1	RGB(176,23,31)	UNKNOWN	SYBR	None
290	M2	Sample 1	RGB(176,23,31)			Target 1	RGB(176,23,31)	UNKNOWN	SYBR	None
291	M3	Sample 1	RGB(176,23,31)			Target 1	RGB(176,23,31)	UNKNOWN	SYBR	None
292	M4	Sample 1	RGB(176,23,31)			Target 1	RGB(176,23,31)	UNKNOWN	SYBR	None
293	M5	Sample 1	RGB(176,23,31)			Target 1	RGB(176,23,31)	UNKNOWN	SYBR	None
294	M6	Sample 1	RGB(176,23,31)			Target 1	RGB(176,23,31)	UNKNOWN	SYBR	None
295	M7	Sample 1	RGB(176,23,31)			Target 1	RGB(176,23,31)	UNKNOWN	SYBR	None
296	M8	Sample 1	RGB(176,23,31)			Target 1	RGB(176,23,31)	UNKNOWN	SYBR	None
297	M9	Sample 1	RGB(176,23,31)			Target 1	RGB(176,23,31)	UNKNOWN	SYBR	None
298	M10	Sample 1	RGB(176,23,31)			Target 1	RGB(176,23,31)	UNKNOWN	SYBR	None
299	M11	Sample 1	RGB(176,23,31)			Target 1	RGB(176,23,31)	UNKNOWN	SYBR	None
300	M12	Sample 1	RGB(176,23,31)			Target 1	RGB(176,23,31)	UNKNOWN	SYBR	None
301	M13	Sample 1	RGB(176,23,31)			Target 1	RGB(176,23,31)	UNKNOWN	SYBR	None
302	M14	Sample 1	RGB(176,23,31)			Target 1	RGB(176,23,31)	UNKNOWN	SYBR	None
303	M15	Sample 1	RGB(176,23,31)			Target 1	RGB(176,23,31)	UNKNOWN	SYBR	None
304	M16	Sample 1	RGB(176,23,31)			Target 1	RGB(176,23,31)	UNKNOWN	SYBR	None
305	M17	Sample 1	RGB(176,23,31)			Target 1	RGB(176,23,31)	UNKNOWN	SYBR	None
306	M18	Sample 1	RGB(176,23,31)			Target 1	RGB(176,23,31)	UNKNOWN	SYBR	None
307	M19	Sample 1	RGB(176,23,31)			Target 1	RGB(176,23,31)	UNKNOWN	SYBR	None
308	M20	Sample 1	RGB(176,23,31)			Target 1	RGB(176,23,31)	UNKNOWN	SYBR	None
309	M21	Sample 1	RGB(176,23,31)			Target 1	RGB(176,23,31)	UNKNOWN	SYBR	None
310	M22	Sample 1	RGB(176,23,31)			Target 1	RGB(176,23,31)	UNKNOWN	SYBR	None
311	M23	Sample 1	RGB(176,23,31)			Target 1	RGB(176,23,31)	UNKNOWN	SYBR	None
312	M24	Sample 1	RGB(176,23,31)			Target 1	RGB(176,23,31)	UNKNOWN	SYBR	None
313	N1	Sample 1	RGB(176,23,31)			Target 1	RGB(176,23,31)	UNKNOWN	SYBR	None
314	N2	Sample 1	RGB(176,23,31)			Target 1	RGB(176,23,31)	UNKNOWN	SYBR	None
315	N3	Sample 1	RGB(176,23,31)			Target 1	RGB(176,23,31)	UNKNOWN	SYBR	None
316	N4	Sample 1	RGB(176,23,31)			Target 1	RGB(176,23,31)	UNKNOWN	SYBR	None
317	N5	Sample 1	RGB(176,23,31)			Target 1	RGB(176,23,31)	UNKNOWN	SYBR	None
318	N6	Sample 1	RGB(176,23,31)			Target 1	RGB(176,23,31)	UNKNOWN	SYBR	None
319	N7	Sample 1	RGB(176,23,31)			Target 1	RGB(176,23,31)	UNKNOWN	SYBR	None
320	N8	Sample 1	RGB(176,23,31)			Target 1	RGB(176,23,31)	UNKNOWN	SYBR	None
321	N9	Sample 1	RGB(176,23,31)			Target 1	RGB(176,23,31)	UNKNOWN	SYBR	None
322	N10	Sample 1	RGB(176,23,31)			Target 1	RGB(176,23,31)	UNKNOWN	SYBR	None
323	N11	Sample 1	RGB(176,23,31)			Target 1	RGB(176,23,31)	UNKNOWN	SYBR	None
324	N12	Sample 1	RGB(176,23,31)			Target 1	RGB(176,23,31)	UNKNOWN	SYBR	None
325	N13	Sample 1	RGB(176,23,31)			Target 1	RGB(176,23,31)	UNKNOWN	SYBR	None
326	N14	Sample 1	RGB(176,23,31)			Target 1	RGB(176,23,31)	UNKNOWN	SYBR	None
327	N15	Sample 1	RGB(176,23,31)			Target 1	RGB(176,23,31)	UNKNOWN	SYBR	None
328	N16	Sample 1	RGB(176,23,31)			Target 1	RGB(176,23,31)	UNKNOWN	SYBR	None
329	N17	Sample 1	RGB(176,23,31)			Target 1	RGB(176,23,31)	UNKNOWN	SYBR	None
330	N18	Sample 1	RGB(176,23,31)			Target 1	RGB(176,23,31)	UNKNOWN	SYBR	None
331	N19	Sample 1	RGB(176,23,31)			Target 1	RGB(176,23,31)	UNKNOWN	SYBR	None
332	N20	Sample 1	RGB(176,23,31)			Target 1	RGB(176,23,31)	UNKNOWN	SYBR	None
333	N21	Sample 1	RGB(176,23,31)			Target 1	RGB(176,23,31)	UNKNOWN	SYBR	None
334	N22	Sample 1	RGB(176,23,31)			Target 1	RGB(176,23,31)	UNKNOWN	SYBR	None
335	N23	Sample 1	RGB(176,23,31)			Target 1	RGB(176,23,31)	UNKNOWN	SYBR	None
336	N24	Sample 1	RGB(176,23,31)			Target 1	RGB(176,23,31)	UNKNOWN	SYBR	None
337	O1	Sample 1	RGB(176,23,31)			Target 1	RGB(176,23,31)	UNKNOWN	SYBR	None
338	O2	Sample 1	RGB(176,23,31)			Target 1	RGB(176,23,31)	UNKNOWN	SYBR	None
339	O3	Sample 1	RGB(176,23,31)			Target 1	RGB(176,23,31)	UNKNOWN	SYBR	None
340	O4	Sample 1	RGB(176,23,31)			Target 1	RGB(176,23,31)	UNKNOWN	SYBR	None
341	O5	Sample 1	RGB(176,23,31)			Target 1	RGB(176,23,31)	UNKNOWN	SYBR	None
342	O6	Sample 1	RGB(176,23,31)			Target 1	RGB(176,23,31)	UNKNOWN	SYBR	None
343	O7	Sample 1	RGB(176,23,31)			Target 1	RGB(176,23,31)	UNKNOWN	SYBR	None
344	O8	Sample 1	RGB(176,23,31)			Target 1	RGB(176,23,31)	UNKNOWN	SYBR	None
345	O9	Sample 1	RGB(176,23,31)			Target 1	RGB(176,23,31)	UNKNOWN	SYBR	None
346	O10	Sample 1	RGB(176,23,31)			Target 1	RGB(176,23,31)	UNKNOWN	SYBR	None
347	O11	Sample 1	RGB(176,23,31)			Target 1	RGB(176,23,31)	UNKNOWN	SYBR	None
348	O12	Sample 1	RGB(176,23,31)			Target 1	RGB(176,23,31)	UNKNOWN	SYBR	None
349	O13	Sample 1	RGB(176,23,31)			Target 1	RGB(176,23,31)	UNKNOWN	SYBR	None
350	O14	Sample 1	RGB(176,23,31)			Target 1	RGB(176,23,31)	UNKNOWN	SYBR	None
351	O15	Sample 1	RGB(176,23,31)			Target 1	RGB(176,23,31)	UNKNOWN	SYBR	None
352	O16	Sample 1	RGB(176,23,31)			Target 1	RGB(176,23,31)	UNKNOWN	SYBR	None
353	O17	Sample 1	RGB(176,23,31)			Target 1	RGB(176,23,31)	UNKNOWN	SYBR	None
354	O18	Sample 1	RGB(176,23,31)			Target 1	RGB(176,23,31)	UNKNOWN	SYBR	None
355	O19	Sample 1	RGB(176,23,31)			Target 1	RGB(176,23,31)	UNKNOWN	SYBR	None
356	O20	Sample 1	RGB(176,23,31)			Target 1	RGB(176,23,31)	UNKNOWN	SYBR	None
357	O21	Sample 1	RGB(176,23,31)			Target 1	RGB(176,23,31)	UNKNOWN	SYBR	None
358	O22	Sample 1	RGB(176,23,31)			Target 1	RGB(176,23,31)	UNKNOWN	SYBR	None
359	O23	Sample 1	RGB(176,23,31)			Target 1	RGB(176,23,31)	UNKNOWN	SYBR	None
360	O24	Sample 1	RGB(176,23,31)			Target 1	RGB(176,23,31)	UNKNOWN	SYBR	None
361	P1	Sample 1	RGB(176,23,31)			Target 1	RGB(176,23,31)	UNKNOWN	SYBR	None
362	P2	Sample 1	RGB(176,23,31)			Target 1	RGB(176,23,31)	UNKNOWN	SYBR	None
363	P3	Sample 1	RGB(176,23,31)			Target 1	RGB(176,23,31)	UNKNOWN	SYBR	None
364	P4	Sample 1	RGB(176,23,31)			Target 1	RGB(176,23,31)	UNKNOWN	SYBR	None
365	P5	Sample 1	RGB(176,23,31)			Target 1	RGB(176,23,31)	UNKNOWN	SYBR	None
366	P6	Sample 1	RGB(176,23,31)			Target 1	RGB(176,23,31)	UNKNOWN	SYBR	None
367	P7	Sample 1	RGB(176,23,31)			Target 1	RGB(176,23,31)	UNKNOWN	SYBR	None
368	P8	Sample 1	RGB(176,23,31)			Target 1	RGB(176,23,31)	UNKNOWN	SYBR	None
369	P9	Sample 1	RGB(176,23,31)			Target 1	RGB(176,23,31)	UNKNOWN	SYBR	None
370	P10	Sample 1	RGB(176,23,31)			Target 1	RGB(176,23,31)	UNKNOWN	SYBR	None
371	P11	Sample 1	RGB(176,23,31)			Target 1	RGB(176,23,31)	UNKNOWN	SYBR	None
372	P12	Sample 1	RGB(176,23,31)			Target 1	RGB(176,23,31)	UNKNOWN	SYBR	None
373	P13	Sample 1	RGB(176,23,31)			Target 1	RGB(176,23,31)	UNKNOWN	SYBR	None
374	P14	Sample 1	RGB(176,23,31)			Target 1	RGB(176,23,31)	UNKNOWN	SYBR	None
375	P15	Sample 1	RGB(176,23,31)			Target 1	RGB(176,23,31)	UNKNOWN	SYBR	None
376	P16	Sample 1	RGB(176,23,31)			Target 1	RGB(176,23,31)	UNKNOWN	SYBR	None
377	P17	Sample 1	RGB(176,23,31)			Target 1	RGB(176,23,31)	UNKNOWN	SYBR	None
378	P18	Sample 1	RGB(176,23,31)			Target 1	RGB(176,23,31)	UNKNOWN	SYBR	None
379	P19	Sample 1	RGB(176,23,31)			Target 1	RGB(176,23,31)	UNKNOWN	SYBR	None
380	P20	Sample 1	RGB(176,23,31)			Target 1	RGB(176,23,31)	UNKNOWN	SYBR	None
381	P21	Sample 1	RGB(176,23,31)			Target 1	RGB(176,23,31)	UNKNOWN	SYBR	None
382	P22	Sample 1	RGB(176,23,31)			Target 1	RGB(176,23,31)	UNKNOWN	SYBR	None
383	P23	Sample 1	RGB(176,23,31)			Target 1	RGB(176,23,31)	UNKNOWN	SYBR	None
384	P24	Sample 1	RGB(176,23,31)			Target 1	RGB(176,23,31)	UNKNOWN	SYBR	None

## Sheet: Amplification Data
Block Type	384-Well Block
Calibration Background is expired	No
Calibration Background performed on	11-14-2023
Calibration Pure Dye ABY is expired	No
Calibration Pure Dye ABY performed on	11-14-2023
Calibration Pure Dye CY5 is expired	No
Calibration Pure Dye CY5 performed on	11-14-2023
Calibration Pure Dye FAM is expired	No
Calibration Pure Dye FAM performed on	11-14-2023
Calibration Pure Dye JUN is expired	No
Calibration Pure Dye JUN performed on	11-14-2023
Calibration Pure Dye MUSTANG PURPLE is expired	No
Calibration Pure Dye MUSTANG PURPLE performed on	11-14-2023
Calibration Pure Dye NED is expired	No
Calibration Pure Dye NED performed on	11-14-2023
Calibration Pure Dye ROX is expired	No
Calibration Pure Dye ROX performed on	11-14-2023
Calibration Pure Dye SYBR is expired	No
Calibration Pure Dye SYBR performed on	11-14-2023
Calibration Pure Dye TAMRA is expired	No
Calibration Pure Dye TAMRA performed on	11-14-2023
Calibration Pure Dye VIC is expired	No
Calibration Pure Dye VIC performed on	11-14-2023
Calibration ROI is expired	No
Calibration ROI performed on	11-14-2023
Calibration Uniformity is expired	No
Calibration Uniformity performed on	11-14-2023
Chemistry	SYBR_GREEN
Date Created	2023-11-14 18:09:54 PM CST
Experiment Barcode
Experiment Comment
Experiment File Name	E:\2023-1114_103838.eds
Experiment Name	2023-06-15_103838
Experiment Run End Time	2023-11-14 17:54:31 PM CST
Experiment Type	Standard Curve
Instrument Name	272530883
Instrument Serial Number	272530883
Instrument Type	QuantStudio™ 5 System
Passive Reference	ROX
Post-read Stage/Step
Pre-read Stage/Step
Quantification Cycle Method	Ct
Signal Smoothing On	true
Stage where Melt Analysis is performed	Stage3
Stage/ Cycle where Ct Analysis is performed	Stage2, Step2
User Name
Well	Well Position	Cycle	Target Name	Rn	Delta Rn
1	A1	1	Target 1	0.0389377	0.000697339
1	A1	2	Target 1	0.0395949	0.00153946
1	A1	3	Target 1	0.0407267	0.00285608
1	A1	4	Target 1	0.0354702	-0.00221552
1	A1	5	Target 1	0.0352592	-0.00224164
1	A1	6	Target 1	0.0416215	0.00430557
1	A1	7	Target 1	0.0400937	0.00296263
1	A1	8	Target 1	0.0375504	0.000604269
1	A1	9	Target 1	0.0358316	-0.000929719
1	A1	10	Target 1	0.0333844	-0.00319198
1	A1	11	Target 1	0.0344165	-0.00197495
1	A1	12	Target 1	0.0419269	0.00572032
1	A1	13	Target 1	0.0382665	0.0022448
1	A1	14	Target 1	0.0278931	-0.00794376
1	A1	15	Target 1	0.0272361	-0.0084159
1	A1	16	Target 1	0.0351194	-0.000347626
1	A1	17	Target 1	0.0401809	0.0048987
1	A1	18	Target 1	0.0363671	0.00126981
1	A1	19	Target 1	0.0345391	-0.00037332
1	A1	20	Target 1	0.0345649	-0.000162636
1	A1	21	Target 1	0.0361672	0.0016246
1	A1	22	Target 1	0.0357962	0.00143841
1	A1	23	Target 1	0.031899	-0.00227388
1	A1	24	Target 1	0.0317217	-0.00226631
1	A1	25	Target 1	0.0360815	0.00227839
1	A1	26	Target 1	0.0357519	0.00213366
1	A1	27	Target 1	0.0366553	0.00322198
1	A1	28	Target 1	0.0478108	0.0145624
1	A1	29	Target 1	0.0671412	0.0340777
1	A1	30	Target 1	0.0890543	0.0561757
1	A1	31	Target 1	0.14202	0.109327
1	A1	32	Target 1	0.239798	0.207289
1	A1	33	Target 1	0.417321	0.384997
1	A1	34	Target 1	0.695436	0.663297
1	A1	35	Target 1	1.08313	1.05117
1	A1	36	Target 1	1.53031	1.49854
1	A1	37	Target 1	1.94824	1.91665
1	A1	38	Target 1	2.23911	2.20771
1	A1	39	Target 1	2.42479	2.39357
1	A1	40	Target 1	2.53094	2.49991
2	A2	1	Target 1	0.068224	-0.00674406
2	A2	2	Target 1	0.0686661	-0.00600422
2	A2	3	Target 1	0.0742309	-0.000141679
2	A2	4	Target 1	0.0724817	-0.00159318
2	A2	5	Target 1	0.0717077	-0.00206937
2	A2	6	Target 1	0.0736341	0.000154739
2	A2	7	Target 1	0.0748192	0.00163758
2	A2	8	Target 1	0.0788081	0.0059242
2	A2	9	Target 1	0.0796005	0.0070144
2	A2	10	Target 1	0.078158	0.00586962
2	A2	11	Target 1	0.0715349	-0.000455703
2	A2	12	Target 1	0.0704583	-0.0012346
2	A2	13	Target 1	0.0737479	0.00235274
2	A2	14	Target 1	0.0700589	-0.00103848
2	A2	15	Target 1	0.0655886	-0.00521106
2	A2	16	Target 1	0.0651902	-0.00531179
2	A2	17	Target 1	0.0666159	-0.00358829
2	A2	18	Target 1	0.0651999	-0.00470651
2	A2	19	Target 1	0.0646517	-0.004957
2	A2	20	Target 1	0.0646981	-0.00461288
2	A2	21	Target 1	0.0650255	-0.00398773
2	A2	22	Target 1	0.0663466	-0.00236889
2	A2	23	Target 1	0.0665056	-0.00191214
2	A2	24	Target 1	0.0692782	0.00115818
2	A2	25	Target 1	0.0771774	0.00935517
2	A2	26	Target 1	0.0772472	0.00972269
2	A2	27	Target 1	0.0788429	0.0116161
2	A2	28	Target 1	0.0939644	0.0270353
2	A2	29	Target 1	0.116183	0.0495514
2	A2	30	Target 1	0.141143	0.074809
2	A2	31	Target 1	0.200948	0.134912
2	A2	32	Target 1	0.303266	0.237528
2	A2	33	Target 1	0.491367	0.425926
2	A2	34	Target 1	0.805605	0.740463
2	A2	35	Target 1	1.22873	1.16388
2	A2	36	Target 1	1.69169	1.62714
2	A2	37	Target 1	2.07676	2.01251
2	A2	38	Target 1	2.33208	2.26813
2	A2	39	Target 1	2.50649	2.44284
2	A2	40	Target 1	2.6079	2.54454
3	A3	1	Target 1	0.0643993	-0.00316865
3	A3	2	Target 1	0.0645851	-0.00296172
3	A3	3	Target 1	0.0683357	0.000810042
3	A3	4	Target 1	0.0694886	0.00198417
3	A3	5	Target 1	0.071459	0.00397572
3	A3	6	Target 1	0.0696138	0.00215167
3	A3	7	Target 1	0.0691886	0.00174772
3	A3	8	Target 1	0.0707756	0.00335588
3	A3	9	Target 1	0.0660578	-0.00134082
3	A3	10	Target 1	0.065717	-0.00166036
3	A3	11	Target 1	0.0701898	0.00283357
3	A3	12	Target 1	0.066969	-0.000366102
3	A3	13	Target 1	0.0645125	-0.00280137
3	A3	14	Target 1	0.0609369	-0.0063558
3	A3	15	Target 1	0.0605662	-0.00670538
3	A3	16	Target 1	0.0625887	-0.00466169
3	A3	17	Target 1	0.0629145	-0.00431467
3	A3	18	Target 1	0.0633674	-0.00384062
3	A3	19	Target 1	0.0648706	-0.0023162
3	A3	20	Target 1	0.0714761	0.00431044
3	A3	21	Target 1	0.0708013	0.00365682
3	A3	22	Target 1	0.0666969	-0.000426382
3	A3	23	Target 1	0.0662662	-0.000835956
3	A3	24	Target 1	0.0696946	0.00261359
3	A3	25	Target 1	0.0702958	0.00323598
3	A3	26	Target 1	0.0719884	0.00494973
3	A3	27	Target 1	0.0747696	0.00775217
3	A3	28	Target 1	0.0901779	0.0231816
3	A3	29	Target 1	0.112005	0.0450295
3	A3	30	Target 1	0.143257	0.0763028
3	A3	31	Target 1	0.212818	0.145885
3	A3	32	Target 1	0.336109	0.269197
3	A3	33	Target 1	0.54695	0.48006
3	A3	34	Target 1	0.866289	0.79942
3	A3	35	Target 1	1.27981	1.21296
3	A3	36	Target 1	1.70337	1.63655
3	A3	37	Target 1	2.04009	1.97328
3	A3	38	Target 1	2.24446	2.17768
3	A3	39	Target 1	2.38068	2.31392
3	A3	40	Target 1	2.47446	2.40772
4	A4	1	Target 1	0.0781482	0.00284868
4	A4	2	Target 1	0.0790361	0.00254529
4	A4	3	Target 1	0.0766569	-0.00102509
4	A4	4	Target 1	0.0761214	-0.0027518
4	A4	5	Target 1	0.0784881	-0.00157633
4	A4	6	Target 1	0.0772009	-0.0040547
4	A4	7	Target 1	0.0787449	-0.00370186
4	A4	8	Target 1	0.0878291	0.00419108
4	A4	9	Target 1	0.0882073	0.00337812
4	A4	10	Target 1	0.086468	0.000447587
4	A4	11	Target 1	0.0844617	-0.00274991
4	A4	12	Target 1	0.0854459	-0.00295693
4	A4	13	Target 1	0.0937774	0.00418336
4	A4	14	Target 1	0.096719	0.00593373
4	A4	15	Target 1	0.101421	0.00944461
4	A4	16	Target 1	0.0954426	0.00227498
4	A4	17	Target 1	0.0928075	-0.00155133
4	A4	18	Target 1	0.0946089	-0.000941146
4	A4	19	Target 1	0.0989545	0.00221321
4	A4	20	Target 1	0.0995253	0.00159286
4	A4	21	Target 1	0.0978798	-0.00124388
4	A4	22	Target 1	0.0953323	-0.00498263
4	A4	23	Target 1	0.0953822	-0.00612392
4	A4	24	Target 1	0.103142	0.000444284
4	A4	25	Target 1	0.112635	0.00874606
4	A4	26	Target 1	0.117114	0.0120341
4	A4	27	Target 1	0.13849	0.0322188
4	A4	28	Target 1	0.18274	0.0752777
4	A4	29	Target 1	0.262743	0.15409
4	A4	30	Target 1	0.400554	0.290709
4	A4	31	Target 1	0.639214	0.528178
4	A4	32	Target 1	0.992812	0.880585
4	A4	33	Target 1	1.43891	1.32549
4	A4	34	Target 1	1.87652	1.76191
4	A4	35	Target 1	2.22809	2.11229
4	A4	36	Target 1	2.44854	2.33155
4	A4	37	Target 1	2.59543	2.47725
4	A4	38	Target 1	2.70294	2.58357
4	A4	39	Target 1	2.78754	2.66698
4	A4	40	Target 1	2.83529	2.71353
5	A5	1	Target 1	0.0384126	-0.00720962
5	A5	2	Target 1	0.0389747	-0.00872457
5	A5	3	Target 1	0.0445549	-0.0052214
5	A5	4	Target 1	0.0454899	-0.00636341
5	A5	5	Target 1	0.0497512	-0.00417924
5	A5	6	Target 1	0.054779	-0.00122841
5	A5	7	Target 1	0.0615444	0.00345993
5	A5	8	Target 1	0.0603883	0.000226786
5	A5	9	Target 1	0.0605419	-0.00169666
5	A5	10	Target 1	0.0678531	0.00353749
5	A5	11	Target 1	0.0694441	0.00305142
5	A5	12	Target 1	0.0772342	0.0087644
5	A5	13	Target 1	0.0813835	0.0108367
5	A5	14	Target 1	0.0767536	0.00412976
5	A5	15	Target 1	0.0745827	-0.000118232
5	A5	16	Target 1	0.0772628	0.000484809
5	A5	17	Target 1	0.0768701	-0.0019849
5	A5	18	Target 1	0.0783124	-0.00261965
5	A5	19	Target 1	0.078289	-0.00472009
5	A5	20	Target 1	0.0842318	-0.000854417
5	A5	21	Target 1	0.0888289	0.00166568
5	A5	22	Target 1	0.0883406	-0.000899689
5	A5	23	Target 1	0.0885054	-0.00281198
5	A5	24	Target 1	0.0899355	-0.0034589
5	A5	25	Target 1	0.102645	0.00717308
5	A5	26	Target 1	0.114584	0.0170356
5	A5	27	Target 1	0.133751	0.0341252
5	A5	28	Target 1	0.175804	0.074101
5	A5	29	Target 1	0.251704	0.147924
5	A5	30	Target 1	0.387486	0.281629
5	A5	31	Target 1	0.620768	0.512834
5	A5	32	Target 1	0.972969	0.862958
5	A5	33	Target 1	1.42412	1.31203
5	A5	34	Target 1	1.88644	1.77228
5	A5	35	Target 1	2.23109	2.11484
5	A5	36	Target 1	2.4613	2.34298
5	A5	37	Target 1	2.62263	2.50223
5	A5	38	Target 1	2.72679	2.60431
5	A5	39	Target 1	2.79668	2.67213
5	A5	40	Target 1	2.85445	2.72782
6	A6	1	Target 1	0.0631988	-0.00411809
6	A6	2	Target 1	0.065811	-0.00338464
6	A6	3	Target 1	0.0755117	0.00443726
6	A6	4	Target 1	0.0756769	0.00272362
6	A6	5	Target 1	0.0771421	0.00231008
6	A6	6	Target 1	0.0808886	0.00417781
6	A6	7	Target 1	0.0821846	0.00359497
6	A6	8	Target 1	0.0797226	-0.00074577
6	A6	9	Target 1	0.0780334	-0.00431377
6	A6	10	Target 1	0.0777201	-0.0065059
6	A6	11	Target 1	0.0795657	-0.00653904
6	A6	12	Target 1	0.0847661	-0.00321742
6	A6	13	Target 1	0.0880663	-0.00179606
6	A6	14	Target 1	0.0868578	-0.00488333
6	A6	15	Target 1	0.0875421	-0.00607783
6	A6	16	Target 1	0.098076	0.0025773
6	A6	17	Target 1	0.100361	0.00298395
6	A6	18	Target 1	0.103117	0.0038612
6	A6	19	Target 1	0.1053	0.00416509
6	A6	20	Target 1	0.106206	0.00319184
6	A6	21	Target 1	0.102996	-0.00189655
6	A6	22	Target 1	0.102648	-0.00412298
6	A6	23	Target 1	0.111086	0.00243627
6	A6	24	Target 1	0.114168	0.00363924
6	A6	25	Target 1	0.120102	0.00769468
6	A6	26	Target 1	0.131843	0.0175566
6	A6	27	Target 1	0.152611	0.0364462
6	A6	28	Target 1	0.197477	0.0794328
6	A6	29	Target 1	0.278225	0.158302
6	A6	30	Target 1	0.424011	0.302209
6	A6	31	Target 1	0.663261	0.539581
6	A6	32	Target 1	1.0324	0.906845
6	A6	33	Target 1	1.49773	1.37029
6	A6	34	Target 1	1.96147	1.83215
6	A6	35	Target 1	2.31542	2.18422
6	A6	36	Target 1	2.53811	2.40504
6	A6	37	Target 1	2.69514	2.56018
6	A6	38	Target 1	2.79641	2.65958
6	A6	39	Target 1	2.88214	2.74343
6	A6	40	Target 1	2.93531	2.79472
7	A7	1	Target 1	0.00479051	0.00460346
7	A7	2	Target 1	0.00564631	0.00483704
7	A7	3	Target 1	0.00592103	0.00448955
7	A7	4	Target 1	0.00658333	0.00452964
7	A7	5	Target 1	0.00477681	0.00210091
7	A7	6	Target 1	0.00375379	0.000455675
7	A7	7	Target 1	0.00394097	2.06454e-05
7	A7	8	Target 1	0.0063293	0.00178676
7	A7	9	Target 1	0.00650222	0.00133747
7	A7	10	Target 1	0.00556322	-0.000223742
7	A7	11	Target 1	0.00160689	-0.00480228
7	A7	12	Target 1	0.00115185	-0.00587954
7	A7	13	Target 1	0.0032888	-0.0043648
7	A7	14	Target 1	0.00420939	-0.00406642
7	A7	15	Target 1	0.00693912	-0.0019589
7	A7	16	Target 1	0.00711991	-0.00240033
7	A7	17	Target 1	0.00786624	-0.00227621
7	A7	18	Target 1	0.0121584	0.00139372
7	A7	19	Target 1	0.0154065	0.00401961
7	A7	20	Target 1	0.0143269	0.0023178
7	A7	21	Target 1	0.0103719	-0.00225934
7	A7	22	Target 1	0.00918359	-0.00406991
7	A7	23	Target 1	0.0100655	-0.00381021
7	A7	24	Target 1	0.012472	-0.00202591
7	A7	25	Target 1	0.0230537	0.00793358
7	A7	26	Target 1	0.0234946	0.00775221
7	A7	27	Target 1	0.0261897	0.00982509
7	A7	28	Target 1	0.0502296	0.0332428
7	A7	29	Target 1	0.0980721	0.0804631
7	A7	30	Target 1	0.182461	0.16423
7	A7	31	Target 1	0.314086	0.295233
7	A7	32	Target 1	0.537218	0.517742
7	A7	33	Target 1	0.894883	0.874785
7	A7	34	Target 1	1.36388	1.34316
7	A7	35	Target 1	1.85939	1.83805
7	A7	36	Target 1	2.26007	2.2381
7	A7	37	Target 1	2.51788	2.49529
7	A7	38	Target 1	2.68256	2.65936
7	A7	39	Target 1	2.7982	2.77437
7	A7	40	Target 1	2.87387	2.84941
8	A8	1	Target 1	0.116199	0.00317728
8	A8	2	Target 1	0.114551	0.00161261
8	A8	3	Target 1	0.111491	-0.0013653
8	A8	4	Target 1	0.108493	-0.00428032
8	A8	5	Target 1	0.108774	-0.00391583
8	A8	6	Target 1	0.113002	0.000395352
8	A8	7	Target 1	0.117357	0.00483362
8	A8	8	Target 1	0.118519	0.00607876
8	A8	9	Target 1	0.11573	0.00337226
8	A8	10	Target 1	0.108877	-0.00339719
8	A8	11	Target 1	0.108758	-0.00343342
8	A8	12	Target 1	0.113796	0.00168724
8	A8	13	Target 1	0.111905	-0.000121053
8	A8	14	Target 1	0.110924	-0.00101822
8	A8	15	Target 1	0.111177	-0.000682925
8	A8	16	Target 1	0.111607	-0.000169051
8	A8	17	Target 1	0.115066	0.00337255
8	A8	18	Target 1	0.115848	0.00423753
8	A8	19	Target 1	0.114304	0.00277621
8	A8	20	Target 1	0.109982	-0.00146242
8	A8	21	Target 1	0.108706	-0.00265539
8	A8	22	Target 1	0.10894	-0.00233865
8	A8	23	Target 1	0.109282	-0.00191376
8	A8	24	Target 1	0.113229	0.00211641
8	A8	25	Target 1	0.120266	0.0092372
8	A8	26	Target 1	0.127007	0.0160607
8	A8	27	Target 1	0.134906	0.0240426
8	A8	28	Target 1	0.158531	0.0477505
8	A8	29	Target 1	0.208034	0.0973372
8	A8	30	Target 1	0.279711	0.169097
8	A8	31	Target 1	0.419826	0.309295
8	A8	32	Target 1	0.66002	0.549572
8	A8	33	Target 1	1.02817	0.917802
8	A8	34	Target 1	1.5004	1.39012
8	A8	35	Target 1	1.9785	1.8683
8	A8	36	Target 1	2.35337	2.24326
8	A8	37	Target 1	2.61128	2.50124
8	A8	38	Target 1	2.77533	2.66538
8	A8	39	Target 1	2.87406	2.76419
8	A8	40	Target 1	2.93769	2.82791
9	A9	1	Target 1	0.0894562	0.00467138
9	A9	2	Target 1	0.0896181	0.00412601
9	A9	3	Target 1	0.0857771	-0.000422318
9	A9	4	Target 1	0.0858255	-0.00108125
9	A9	5	Target 1	0.0901842	0.00257016
9	A9	6	Target 1	0.0932655	0.00494416
9	A9	7	Target 1	0.0940047	0.0049761
9	A9	8	Target 1	0.0914345	0.00169857
9	A9	9	Target 1	0.0905721	0.000128884
9	A9	10	Target 1	0.0925134	0.00136283
9	A9	11	Target 1	0.0935435	0.00168566
9	A9	12	Target 1	0.0935036	0.000938439
9	A9	13	Target 1	0.0920489	-0.00122355
9	A9	14	Target 1	0.090995	-0.00298471
9	A9	15	Target 1	0.089794	-0.00489306
9	A9	16	Target 1	0.089337	-0.00605738
9	A9	17	Target 1	0.0910629	-0.00503881
9	A9	18	Target 1	0.0948392	-0.00196979
9	A9	19	Target 1	0.0910818	-0.00643445
9	A9	20	Target 1	0.0913617	-0.00686183
9	A9	21	Target 1	0.098752	-0.000178913
9	A9	22	Target 1	0.0998337	0.000195465
9	A9	23	Target 1	0.0993878	-0.000957712
9	A9	24	Target 1	0.101277	0.000224473
9	A9	25	Target 1	0.110842	0.0090816
9	A9	26	Target 1	0.112765	0.0102974
9	A9	27	Target 1	0.117025	0.01385
9	A9	28	Target 1	0.138908	0.0350257
9	A9	29	Target 1	0.171213	0.066624
9	A9	30	Target 1	0.238567	0.13327
9	A9	31	Target 1	0.346238	0.240234
9	A9	32	Target 1	0.54196	0.435249
9	A9	33	Target 1	0.854089	0.74667
9	A9	34	Target 1	1.28891	1.18078
9	A9	35	Target 1	1.78291	1.67407
9	A9	36	Target 1	2.21858	2.10904
9	A9	37	Target 1	2.51031	2.40006
9	A9	38	Target 1	2.69764	2.58668
9	A9	39	Target 1	2.81289	2.70123
9	A9	40	Target 1	2.90589	2.79352
10	A10	1	Target 1	0.101455	0.00583262
10	A10	2	Target 1	0.101502	0.00574387
10	A10	3	Target 1	0.0985992	0.00270524
10	A10	4	Target 1	0.0984543	0.00242476
10	A10	5	Target 1	0.101511	0.00534546
10	A10	6	Target 1	0.0985826	0.00228198
10	A10	7	Target 1	0.0929018	-0.00353437
10	A10	8	Target 1	0.0930453	-0.00352648
10	A10	9	Target 1	0.0987249	0.00201756
10	A10	10	Target 1	0.0974081	0.000565164
10	A10	11	Target 1	0.0922561	-0.00472234
10	A10	12	Target 1	0.0915716	-0.00554243
10	A10	13	Target 1	0.0939238	-0.00332582
10	A10	14	Target 1	0.0969334	-0.000451728
10	A10	15	Target 1	0.0992798	0.00175911
10	A10	16	Target 1	0.0971594	-0.000496844
10	A10	17	Target 1	0.0965631	-0.00122879
10	A10	18	Target 1	0.0975577	-0.000369711
10	A10	19	Target 1	0.0951254	-0.00293761
10	A10	20	Target 1	0.0957396	-0.00245893
10	A10	21	Target 1	0.101921	0.0035864
10	A10	22	Target 1	0.102676	0.00420634
10	A10	23	Target 1	0.102308	0.00370304
10	A10	24	Target 1	0.105185	0.00644441
10	A10	25	Target 1	0.121145	0.022269
10	A10	26	Target 1	0.143039	0.0440275
10	A10	27	Target 1	0.167616	0.0684687
10	A10	28	Target 1	0.219063	0.11978
10	A10	29	Target 1	0.317154	0.217735
10	A10	30	Target 1	0.500306	0.400751
10	A10	31	Target 1	0.810086	0.710397
10	A10	32	Target 1	1.22779	1.12796
10	A10	33	Target 1	1.71822	1.61826
10	A10	34	Target 1	2.17895	2.07886
10	A10	35	Target 1	2.49649	2.39625
10	A10	36	Target 1	2.70441	2.60404
10	A10	37	Target 1	2.85025	2.74974
10	A10	38	Target 1	2.93693	2.83629
10	A10	39	Target 1	3.01053	2.90976
10	A10	40	Target 1	3.06728	2.96637
11	A11	1	Target 1	0.0813431	0.00686945
11	A11	2	Target 1	0.0734842	-0.00184673
11	A11	3	Target 1	0.0605251	-0.0156632
11	A11	4	Target 1	0.0624998	-0.0145458
11	A11	5	Target 1	0.0864237	0.00852082
11	A11	6	Target 1	0.0892464	0.0104862
11	A11	7	Target 1	0.0825224	0.00290485
11	A11	8	Target 1	0.0806625	0.000187587
11	A11	9	Target 1	0.0848513	0.00351909
11	A11	10	Target 1	0.0849713	0.00278177
11	A11	11	Target 1	0.0868715	0.0038246
11	A11	12	Target 1	0.0872757	0.00337151
11	A11	13	Target 1	0.0915536	0.00679208
11	A11	14	Target 1	0.0891515	0.00353266
11	A11	15	Target 1	0.0865935	0.000117362
11	A11	16	Target 1	0.0864476	-0.000885943
11	A11	17	Target 1	0.0848682	-0.00332259
11	A11	18	Target 1	0.0836842	-0.00536399
11	A11	19	Target 1	0.0850982	-0.00480726
11	A11	20	Target 1	0.0939446	0.0031818
11	A11	21	Target 1	0.0940471	0.002427
11	A11	22	Target 1	0.089901	-0.00257641
11	A11	23	Target 1	0.0888526	-0.00448214
11	A11	24	Target 1	0.0973279	0.00313581
11	A11	25	Target 1	0.111688	0.0166389
11	A11	26	Target 1	0.124076	0.0281694
11	A11	27	Target 1	0.153061	0.0562967
11	A11	28	Target 1	0.206162	0.108541
11	A11	29	Target 1	0.309735	0.211256
11	A11	30	Target 1	0.478821	0.379485
11	A11	31	Target 1	0.763078	0.662885
11	A11	32	Target 1	1.18157	1.08052
11	A11	33	Target 1	1.67225	1.57034
11	A11	34	Target 1	2.10591	2.00314
11	A11	35	Target 1	2.41739	2.31377
11	A11	36	Target 1	2.6173	2.51281
11	A11	37	Target 1	2.74676	2.64143
11	A11	38	Target 1	2.84461	2.73842
11	A11	39	Target 1	2.91307	2.80602
11	A11	40	Target 1	2.95068	2.84277
12	A12	1	Target 1	0.0890502	0.00593085
12	A12	2	Target 1	0.0886608	0.00522324
12	A12	3	Target 1	0.0880905	0.00433481
12	A12	4	Target 1	0.0869397	0.00286578
12	A12	5	Target 1	0.0847873	0.000395213
12	A12	6	Target 1	0.0846891	-2.12212e-05
12	A12	7	Target 1	0.0872692	0.00224075
12	A12	8	Target 1	0.0849771	-0.0003696
12	A12	9	Target 1	0.083175	-0.00248986
12	A12	10	Target 1	0.0802426	-0.00574042
12	A12	11	Target 1	0.0803663	-0.00593495
12	A12	12	Target 1	0.0855112	-0.00110825
12	A12	13	Target 1	0.0890918	0.00215422
12	A12	14	Target 1	0.0849018	-0.00235401
12	A12	15	Target 1	0.0843565	-0.00321754
12	A12	16	Target 1	0.08903	0.00113779
12	A12	17	Target 1	0.0910784	0.00286803
12	A12	18	Target 1	0.0896468	0.00111823
12	A12	19	Target 1	0.0890795	0.000232719
12	A12	20	Target 1	0.0909107	0.00174577
12	A12	21	Target 1	0.0907954	0.00131229
12	A12	22	Target 1	0.0903155	0.000514124
12	A12	23	Target 1	0.0904356	0.000316119
12	A12	24	Target 1	0.0918031	0.00136542
12	A12	25	Target 1	0.102743	0.0119873
12	A12	26	Target 1	0.121251	0.0301771
12	A12	27	Target 1	0.147078	0.0556858
12	A12	28	Target 1	0.200491	0.108781
12	A12	29	Target 1	0.288	0.195971
12	A12	30	Target 1	0.456494	0.364147
12	A12	31	Target 1	0.725919	0.633254
12	A12	32	Target 1	1.12556	1.03258
12	A12	33	Target 1	1.61374	1.52044
12	A12	34	Target 1	2.08215	1.98853
12	A12	35	Target 1	2.42131	2.32737
12	A12	36	Target 1	2.64516	2.55091
12	A12	37	Target 1	2.80763	2.71305
12	A12	38	Target 1	2.92219	2.82729
12	A12	39	Target 1	2.99277	2.89756
12	A12	40	Target 1	3.03932	2.9438
13	A13	1	Target 1	0.0773873	-0.000861135
13	A13	2	Target 1	0.0805505	0.00232233
13	A13	3	Target 1	0.0810978	0.00288993
13	A13	4	Target 1	0.0805837	0.00239605
13	A13	5	Target 1	0.0804794	0.00231206
13	A13	6	Target 1	0.0799155	0.00176849
13	A13	7	Target 1	0.0804493	0.00232255
13	A13	8	Target 1	0.0799142	0.00180766
13	A13	9	Target 1	0.0791545	0.00106825
13	A13	10	Target 1	0.0789464	0.000880469
13	A13	11	Target 1	0.0773744	-0.000671328
13	A13	12	Target 1	0.0771671	-0.000858344
13	A13	13	Target 1	0.0797239	0.0017188
13	A13	14	Target 1	0.0767645	-0.00122031
13	A13	15	Target 1	0.068642	-0.00932263
13	A13	16	Target 1	0.0684295	-0.0095148
13	A13	17	Target 1	0.0747403	-0.00318373
13	A13	18	Target 1	0.0749098	-0.00299395
13	A13	19	Target 1	0.073684	-0.00419951
13	A13	20	Target 1	0.0729648	-0.00489841
13	A13	21	Target 1	0.0732791	-0.00456379
13	A13	22	Target 1	0.0754591	-0.00236359
13	A13	23	Target 1	0.085352	0.00754966
13	A13	24	Target 1	0.0866075	0.00882538
13	A13	25	Target 1	0.0833149	0.0055531
13	A13	26	Target 1	0.0803165	0.00257498
13	A13	27	Target 1	0.0798443	0.00212301
13	A13	28	Target 1	0.0866234	0.00892244
13	A13	29	Target 1	0.1025	0.0248191
13	A13	30	Target 1	0.118128	0.0404676
13	A13	31	Target 1	0.152969	0.0753291
13	A13	32	Target 1	0.217828	0.140208
13	A13	33	Target 1	0.331576	0.253976
13	A13	34	Target 1	0.537308	0.459728
13	A13	35	Target 1	0.864067	0.786508
13	A13	36	Target 1	1.30664	1.2291
13	A13	37	Target 1	1.79301	1.71549
13	A13	38	Target 1	2.19762	2.12012
13	A13	39	Target 1	2.4725	2.39502
13	A13	40	Target 1	2.64286	2.5654
14	A14	1	Target 1	0.0805356	-0.00104236
14	A14	2	Target 1	0.0811246	-0.000748612
14	A14	3	Target 1	0.0823335	0.000165049
14	A14	4	Target 1	0.0804289	-0.00203478
14	A14	5	Target 1	0.0800448	-0.00271415
14	A14	6	Target 1	0.0814426	-0.00161163
14	A14	7	Target 1	0.081864	-0.00148552
14	A14	8	Target 1	0.0827612	-0.000883583
14	A14	9	Target 1	0.0876664	0.00372633
14	A14	10	Target 1	0.0891196	0.00488434
14	A14	11	Target 1	0.090085	0.00555441
14	A14	12	Target 1	0.086184	0.00135823
14	A14	13	Target 1	0.0848677	-0.000253346
14	A14	14	Target 1	0.085297	-0.000119365
14	A14	15	Target 1	0.0852465	-0.000465142
14	A14	16	Target 1	0.0877147	0.00170788
14	A14	17	Target 1	0.0897778	0.00347571
14	A14	18	Target 1	0.0873466	0.000749241
14	A14	19	Target 1	0.0804377	-0.00645491
14	A14	20	Target 1	0.0814906	-0.00569728
14	A14	21	Target 1	0.0904929	0.00300969
14	A14	22	Target 1	0.0854311	-0.0023473
14	A14	23	Target 1	0.0806114	-0.00746226
14	A14	24	Target 1	0.081839	-0.00653002
14	A14	25	Target 1	0.0904439	0.00177971
14	A14	26	Target 1	0.0939721	0.0050126
14	A14	27	Target 1	0.0958908	0.0066361
14	A14	28	Target 1	0.0988608	0.00931082
14	A14	29	Target 1	0.112484	0.0226391
14	A14	30	Target 1	0.135127	0.0449862
14	A14	31	Target 1	0.164536	0.0741002
14	A14	32	Target 1	0.225845	0.135114
14	A14	33	Target 1	0.344765	0.253738
14	A14	34	Target 1	0.553907	0.462585
14	A14	35	Target 1	0.888854	0.797237
14	A14	36	Target 1	1.33387	1.24196
14	A14	37	Target 1	1.83193	1.73972
14	A14	38	Target 1	2.25299	2.16049
14	A14	39	Target 1	2.52561	2.43282
14	A14	40	Target 1	2.68542	2.59233
15	A15	1	Target 1	0.0330949	-0.0226058
15	A15	2	Target 1	0.0408792	-0.0151121
15	A15	3	Target 1	0.0515873	-0.00469466
15	A15	4	Target 1	0.0529608	-0.00361187
15	A15	5	Target 1	0.0567165	-0.000146839
15	A15	6	Target 1	0.0572285	7.4477e-05
15	A15	7	Target 1	0.060334	0.00288927
15	A15	8	Target 1	0.0614029	0.00366752
15	A15	9	Target 1	0.0606549	0.00262887
15	A15	10	Target 1	0.0620938	0.00377713
15	A15	11	Target 1	0.0609563	0.00234896
15	A15	12	Target 1	0.0603455	0.0014474
15	A15	13	Target 1	0.0623752	0.00318643
15	A15	14	Target 1	0.0596302	0.000150768
15	A15	15	Target 1	0.0504013	-0.00936873
15	A15	16	Target 1	0.0488444	-0.0112163
15	A15	17	Target 1	0.0567557	-0.00359572
15	A15	18	Target 1	0.0621852	0.00154314
15	A15	19	Target 1	0.065128	0.0041952
15	A15	20	Target 1	0.0654399	0.00421647
15	A15	21	Target 1	0.0691736	0.00765951
15	A15	22	Target 1	0.0672523	0.00544748
15	A15	23	Target 1	0.0607186	-0.00137686
15	A15	24	Target 1	0.0583119	-0.00407419
15	A15	25	Target 1	0.0599427	-0.00273415
15	A15	26	Target 1	0.0603156	-0.00265184
15	A15	27	Target 1	0.0634967	0.000238563
15	A15	28	Target 1	0.0698985	0.0063497
15	A15	29	Target 1	0.0859672	0.0221277
15	A15	30	Target 1	0.117153	0.0530225
15	A15	31	Target 1	0.154488	0.0900674
15	A15	32	Target 1	0.225035	0.160323
15	A15	33	Target 1	0.363643	0.298641
15	A15	34	Target 1	0.607303	0.54201
15	A15	35	Target 1	0.984969	0.919385
15	A15	36	Target 1	1.44892	1.38305
15	A15	37	Target 1	1.91839	1.85223
15	A15	38	Target 1	2.27784	2.21138
15	A15	39	Target 1	2.52113	2.45439
15	A15	40	Target 1	2.66937	2.60233
16	A16	1	Target 1	0.100534	-0.000624082
16	A16	2	Target 1	0.103036	0.0025781
16	A16	3	Target 1	0.102259	0.00250219
16	A16	4	Target 1	0.100495	0.00143922
16	A16	5	Target 1	0.0978084	-0.000547083
16	A16	6	Target 1	0.0969729	-0.000681877
16	A16	7	Target 1	0.0979318	0.000977741
16	A16	8	Target 1	0.0967074	0.000454041
16	A16	9	Target 1	0.0944408	-0.0011118
16	A16	10	Target 1	0.0937229	-0.00112894
16	A16	11	Target 1	0.0938357	-0.000315466
16	A16	12	Target 1	0.0915946	-0.00185578
16	A16	13	Target 1	0.090647	-0.00210272
16	A16	14	Target 1	0.0906198	-0.0014292
16	A16	15	Target 1	0.0900639	-0.00128435
16	A16	16	Target 1	0.0897766	-0.000870975
16	A16	17	Target 1	0.0903502	0.000403389
16	A16	18	Target 1	0.0916204	0.00237428
16	A16	19	Target 1	0.0910199	0.00247453
16	A16	20	Target 1	0.0885475	0.000702809
16	A16	21	Target 1	0.0898156	0.00267166
16	A16	22	Target 1	0.0995514	0.0131082
16	A16	23	Target 1	0.11138	0.0256377
16	A16	24	Target 1	0.131303	0.0462616
16	A16	25	Target 1	0.165345	0.0810044
16	A16	26	Target 1	0.222982	0.139342
16	A16	27	Target 1	0.340112	0.257172
16	A16	28	Target 1	0.540757	0.458519
16	A16	29	Target 1	0.863701	0.782163
16	A16	30	Target 1	1.30276	1.22192
16	A16	31	Target 1	1.77471	1.69457
16	A16	32	Target 1	2.16483	2.08539
16	A16	33	Target 1	2.42496	2.34622
16	A16	34	Target 1	2.60765	2.52962
16	A16	35	Target 1	2.72327	2.64593
16	A16	36	Target 1	2.79162	2.71499
16	A16	37	Target 1	2.84765	2.77172
16	A16	38	Target 1	2.87569	2.80046
16	A16	39	Target 1	2.90574	2.83121
16	A16	40	Target 1	2.92488	2.85105
17	A17	1	Target 1	0.121934	-0.00220318
17	A17	2	Target 1	0.12388	-0.000217996
17	A17	3	Target 1	0.122479	-0.00157942
17	A17	4	Target 1	0.122448	-0.00157051
17	A17	5	Target 1	0.126679	0.00269935
17	A17	6	Target 1	0.125995	0.00205466
17	A17	7	Target 1	0.125096	0.00119553
17	A17	8	Target 1	0.124737	0.000875422
17	A17	9	Target 1	0.12185	-0.00197212
17	A17	10	Target 1	0.121155	-0.00262776
17	A17	11	Target 1	0.123809	6.55214e-05
17	A17	12	Target 1	0.127153	0.00344871
17	A17	13	Target 1	0.124148	0.000483914
17	A17	14	Target 1	0.121425	-0.00219967
17	A17	15	Target 1	0.122864	-0.000722099
17	A17	16	Target 1	0.128834	0.00528797
17	A17	17	Target 1	0.118226	-0.00528087
17	A17	18	Target 1	0.116865	-0.00660295
17	A17	19	Target 1	0.124106	0.000677987
17	A17	20	Target 1	0.126262	0.00287333
17	A17	21	Target 1	0.126242	0.00289299
17	A17	22	Target 1	0.130705	0.00739558
17	A17	23	Target 1	0.143177	0.0199065
17	A17	24	Target 1	0.155795	0.0325637
17	A17	25	Target 1	0.190719	0.067527
17	A17	26	Target 1	0.240609	0.117457
17	A17	27	Target 1	0.344123	0.22101
17	A17	28	Target 1	0.529411	0.406337
17	A17	29	Target 1	0.822534	0.6995
17	A17	30	Target 1	1.24525	1.12225
17	A17	31	Target 1	1.7369	1.61394
17	A17	32	Target 1	2.18074	2.05783
17	A17	33	Target 1	2.50174	2.37886
17	A17	34	Target 1	2.70907	2.58623
17	A17	35	Target 1	2.85486	2.73207
17	A17	36	Target 1	2.95623	2.83347
17	A17	37	Target 1	3.02336	2.90064
17	A17	38	Target 1	3.06879	2.94611
17	A17	39	Target 1	3.09739	2.97475
17	A17	40	Target 1	3.12145	2.99885
18	A18	1	Target 1	0.0327989	0.00160878
18	A18	2	Target 1	0.032737	0.00188355
18	A18	3	Target 1	0.0341802	0.00366347
18	A18	4	Target 1	0.0269638	-0.00321623
18	A18	5	Target 1	0.0258401	-0.00400325
18	A18	6	Target 1	0.0309972	0.00149055
18	A18	7	Target 1	0.0320083	0.00283834
18	A18	8	Target 1	0.0319802	0.00314692
18	A18	9	Target 1	0.0263225	-0.00217407
18	A18	10	Target 1	0.0242549	-0.00390499
18	A18	11	Target 1	0.023656	-0.00416725
18	A18	12	Target 1	0.0245222	-0.00296434
18	A18	13	Target 1	0.0303021	0.0031523
18	A18	14	Target 1	0.0320798	0.00526667
18	A18	15	Target 1	0.0292967	0.00282022
18	A18	16	Target 1	0.0264853	0.000345602
18	A18	17	Target 1	0.0268795	0.00107648
18	A18	18	Target 1	0.0301695	0.00470315
18	A18	19	Target 1	0.0212292	-0.00390047
18	A18	20	Target 1	0.0206199	-0.0041731
18	A18	21	Target 1	0.0290157	0.00455937
18	A18	22	Target 1	0.0341615	0.0100419
18	A18	23	Target 1	0.0445987	0.0208158
18	A18	24	Target 1	0.0617865	0.0383403
18	A18	25	Target 1	0.0987263	0.0756168
18	A18	26	Target 1	0.157556	0.134783
18	A18	27	Target 1	0.267578	0.245141
18	A18	28	Target 1	0.471782	0.449682
18	A18	29	Target 1	0.79824	0.776478
18	A18	30	Target 1	1.24387	1.22245
18	A18	31	Target 1	1.73904	1.71795
18	A18	32	Target 1	2.16839	2.14764
18	A18	33	Target 1	2.45573	2.43531
18	A18	34	Target 1	2.6471	2.62702
18	A18	35	Target 1	2.78482	2.76508
18	A18	36	Target 1	2.87796	2.85855
18	A18	37	Target 1	2.94703	2.92796
18	A18	38	Target 1	2.99408	2.97535
18	A18	39	Target 1	3.03505	3.01665
18	A18	40	Target 1	3.05111	3.03305
19	A19	1	Target 1	2.89315	0.487611
19	A19	2	Target 1	2.81622	0.403199
19	A19	3	Target 1	1.89782	-0.52268
19	A19	4	Target 1	2.17092	-0.257057
19	A19	5	Target 1	3.70978	1.27432
19	A19	6	Target 1	4.14633	1.70339
19	A19	7	Target 1	3.88455	1.43413
19	A19	8	Target 1	3.1148	0.656895
19	A19	9	Target 1	2.10359	-0.361798
19	A19	10	Target 1	1.93523	-0.537638
19	A19	11	Target 1	1.95446	-0.525887
19	A19	12	Target 1	1.68144	-0.806383
19	A19	13	Target 1	1.53242	-0.962883
19	A19	14	Target 1	1.83738	-0.66541
19	A19	15	Target 1	2.43214	-0.0781277
19	A19	16	Target 1	2.30226	-0.215485
19	A19	17	Target 1	2.83835	0.313124
19	A19	18	Target 1	2.90529	0.372584
19	A19	19	Target 1	2.63141	0.0912224
19	A19	20	Target 1	3.07088	0.523214
19	A19	21	Target 1	2.70082	0.145672
19	A19	22	Target 1	1.55495	-1.00768
19	A19	23	Target 1	0.957618	-1.61249
19	A19	24	Target 1	1.72319	-0.854397
19	A19	25	Target 1	4.15982	1.57475
19	A19	26	Target 1	0.983967	-1.60859
19	A19	27	Target 1	0.579561	-2.02047
19	A19	28	Target 1	2.73601	0.128499
19	A19	29	Target 1	3.31908	0.704081
19	A19	30	Target 1	2.10264	-0.519837
19	A19	31	Target 1	1.9037	-0.726251
19	A19	32	Target 1	3.46991	0.832476
19	A19	33	Target 1	4.22491	1.57999
19	A19	34	Target 1	4.17262	1.52022
19	A19	35	Target 1	3.18782	0.527944
19	A19	36	Target 1	2.17084	-0.496522
19	A19	37	Target 1	3.361	0.686165
19	A19	38	Target 1	3.03309	0.350768
19	A19	39	Target 1	2.04994	-0.639856
19	A19	40	Target 1	1.27652	-1.42076
20	A20	1	Target 1	1.40517	11.3441
20	A20	2	Target 1	-1.12293	8.56177
20	A20	3	Target 1	-54.8048	-45.3743
20	A20	4	Target 1	2.97889	12.1552
20	A20	5	Target 1	-0.908528	8.01354
20	A20	6	Target 1	-3.05539	5.61246
20	A20	7	Target 1	-3.64364	4.77001
20	A20	8	Target 1	-3.45493	4.7045
20	A20	9	Target 1	-3.59874	4.30649
20	A20	10	Target 1	1.17886	8.82989
20	A20	11	Target 1	1.29843	8.69524
20	A20	12	Target 1	-1.65426	5.48835
20	A20	13	Target 1	-3.98261	2.90579
20	A20	14	Target 1	-3.26124	3.37295
20	A20	15	Target 1	-5.25102	1.12896
20	A20	16	Target 1	-17.0825	-10.9568
20	A20	17	Target 1	-6.21213	-0.340568
20	A20	18	Target 1	3.15597	8.77332
20	A20	19	Target 1	-27.6723	-22.3092
20	A20	20	Target 1	1.10582	6.21475
20	A20	21	Target 1	-0.905438	3.94929
20	A20	22	Target 1	-0.864448	3.73607
20	A20	23	Target 1	0.563899	4.91021
20	A20	24	Target 1	1.78656	5.87866
20	A20	25	Target 1	-46.4742	-42.6363
20	A20	26	Target 1	6.20047	9.78415
20	A20	27	Target 1	-0.0855867	3.24389
20	A20	28	Target 1	-4.15279	-1.07753
20	A20	29	Target 1	-4.1395	-1.31845
20	A20	30	Target 1	-5.69468	-3.12784
20	A20	31	Target 1	-7.95653	-5.64389
20	A20	32	Target 1	-0.21059	1.84784
20	A20	33	Target 1	15.3153	17.1195
20	A20	34	Target 1	0.84765	2.39766
20	A20	35	Target 1	0.693262	1.98906
20	A20	36	Target 1	-6.37488	-5.33328
20	A20	37	Target 1	3.32133	4.10872
20	A20	38	Target 1	-9.19122	-8.65805
20	A20	39	Target 1	2.56077	2.83973
20	A20	40	Target 1	-3.91551	-3.89075
21	A21	1	Target 1	-23.4989	-6.4272
21	A21	2	Target 1	-24.4833	-7.31648
21	A21	3	Target 1	-15.624	1.63789
21	A21	4	Target 1	-15.7127	1.64426
21	A21	5	Target 1	-13.9087	3.54326
21	A21	6	Target 1	-15.9359	1.61113
21	A21	7	Target 1	-15.9969	1.64522
21	A21	8	Target 1	-20.1675	-2.43034
21	A21	9	Target 1	-28.7198	-10.8876
21	A21	10	Target 1	-39.555	-21.6277
21	A21	11	Target 1	-54.5981	-36.5758
21	A21	12	Target 1	-55.1882	-37.0707
21	A21	13	Target 1	-23.2974	-5.08493
21	A21	14	Target 1	-30.5634	-12.2558
21	A21	15	Target 1	-38.647	-20.2443
21	A21	16	Target 1	-22.4	-3.90226
21	A21	17	Target 1	-17.6336	0.959186
21	A21	18	Target 1	-33.3326	-14.6448
21	A21	19	Target 1	-45.5886	-26.8057
21	A21	20	Target 1	-26.7841	-7.9062
21	A21	21	Target 1	232.899	251.872
21	A21	22	Target 1	47.9219	66.9899
21	A21	23	Target 1	59.6101	78.7733
21	A21	24	Target 1	-70.9344	-51.6762
21	A21	25	Target 1	-22.5227	-3.16944
21	A21	26	Target 1	-39.1106	-19.6623
21	A21	27	Target 1	-130.859	-111.316
21	A21	28	Target 1	-115.131	-95.4923
21	A21	29	Target 1	-22.9166	-3.18303
21	A21	30	Target 1	-23.876	-4.04741
21	A21	31	Target 1	103.107	123.03
21	A21	32	Target 1	68.586	88.6047
21	A21	33	Target 1	-32.4601	-12.3463
21	A21	34	Target 1	-35.4931	-15.2843
21	A21	35	Target 1	-43.6953	-23.3914
21	A21	36	Target 1	-25.2369	-4.83794
21	A21	37	Target 1	-30.9791	-10.4851
21	A21	38	Target 1	-50.4394	-29.8503
21	A21	39	Target 1	-56.818	-36.1338
21	A21	40	Target 1	-81.2761	-60.4968
22	A22	1	Target 1	0.259276	-1.62107
22	A22	2	Target 1	0.11073	-1.52226
22	A22	3	Target 1	0.0178427	-1.36779
22	A22	4	Target 1	-0.35424	-1.49252
22	A22	5	Target 1	-0.869826	-1.76075
22	A22	6	Target 1	-1.23479	-1.87836
22	A22	7	Target 1	-0.847599	-1.24382
22	A22	8	Target 1	0.713204	0.564341
22	A22	9	Target 1	0.0105909	0.109083
22	A22	10	Target 1	-0.288733	0.0571132
22	A22	11	Target 1	0.443071	1.03627
22	A22	12	Target 1	0.267946	1.1085
22	A22	13	Target 1	-0.528342	0.559568
22	A22	14	Target 1	-1.74183	-0.406564
22	A22	15	Target 1	-2.34284	-0.760217
22	A22	16	Target 1	-2.10275	-0.27278
22	A22	17	Target 1	-1.7665	0.310828
22	A22	18	Target 1	-0.877426	1.44726
22	A22	19	Target 1	0.263044	2.83508
22	A22	20	Target 1	-0.923248	1.89614
22	A22	21	Target 1	-2.76363	0.303118
22	A22	22	Target 1	-3.00653	0.307576
22	A22	23	Target 1	-2.48626	1.0752
22	A22	24	Target 1	-2.21335	1.59546
22	A22	25	Target 1	-2.32714	1.72902
22	A22	26	Target 1	-4.0665	0.237022
22	A22	27	Target 1	-5.0509	-0.500025
22	A22	28	Target 1	-3.42343	1.3748
22	A22	29	Target 1	-3.71378	1.3318
22	A22	30	Target 1	-4.22265	1.07029
22	A22	31	Target 1	-4.87223	0.668059
22	A22	32	Target 1	-8.37459	-2.58695
22	A22	33	Target 1	-9.88471	-3.84971
22	A22	34	Target 1	-8.19129	-1.90893
22	A22	35	Target 1	-7.61666	-1.08695
22	A22	36	Target 1	-4.64932	2.12775
22	A22	37	Target 1	-3.91149	3.11293
22	A22	38	Target 1	-9.36743	-2.09566
22	A22	39	Target 1	-11.1653	-3.64619
22	A22	40	Target 1	-5.33214	2.43434
23	A23	1	Target 1	232.319	76.0618
23	A23	2	Target 1	208.321	52.0643
23	A23	3	Target 1	202.545	46.2881
23	A23	4	Target 1	109.969	-46.2881
23	A23	5	Target 1	101.522	-54.7352
23	A23	6	Target 1	161.985	5.72822
23	A23	7	Target 1	107.175	-49.0819
23	A23	8	Target 1	75.3851	-80.8721
23	A23	9	Target 1	75.5	-80.7572
23	A23	10	Target 1	108.785	-47.4723
23	A23	11	Target 1	98.4431	-57.8141
23	A23	12	Target 1	94.3623	-61.8948
23	A23	13	Target 1	126.037	-30.2199
23	A23	14	Target 1	107.641	-48.616
23	A23	15	Target 1	95.1572	-61.1
23	A23	16	Target 1	95.5737	-60.6835
23	A23	17	Target 1	109.388	-46.8696
23	A23	18	Target 1	276.342	120.084
23	A23	19	Target 1	298.842	142.585
23	A23	20	Target 1	171.793	15.5355
23	A23	21	Target 1	89.5001	-66.7571
23	A23	22	Target 1	83.321	-72.9362
23	A23	23	Target 1	119.465	-36.7926
23	A23	24	Target 1	114.095	-42.1618
23	A23	25	Target 1	91.5811	-64.6761
23	A23	26	Target 1	79.6469	-76.6103
23	A23	27	Target 1	70.2429	-86.0143
23	A23	28	Target 1	67.6668	-88.5904
23	A23	29	Target 1	71.0905	-85.1667
23	A23	30	Target 1	78.18	-78.0772
23	A23	31	Target 1	76.7963	-79.4609
23	A23	32	Target 1	64.6485	-91.6087
23	A23	33	Target 1	68.5675	-87.6896
23	A23	34	Target 1	108.385	-47.8724
23	A23	35	Target 1	114.959	-41.298
23	A23	36	Target 1	110.136	-46.1214
23	A23	37	Target 1	100.055	-56.2017
23	A23	38	Target 1	95.9985	-60.2587
23	A23	39	Target 1	121.711	-34.5461
23	A23	40	Target 1	153.679	-2.57799
24	A24	1	Target 1	97.7217	53.7985
24	A24	2	Target 1	74.3294	28.2712
24	A24	3	Target 1	61.8882	13.695
24	A24	4	Target 1	57.3847	7.05652
24	A24	5	Target 1	54.3674	1.90413
24	A24	6	Target 1	57.7551	3.15683
24	A24	7	Target 1	54.7014	-2.03184
24	A24	8	Target 1	52.1738	-6.69443
24	A24	9	Target 1	47.9395	-13.0638
24	A24	10	Target 1	40.3598	-22.7785
24	A24	11	Target 1	42.8572	-22.4161
24	A24	12	Target 1	76.5563	9.14805
24	A24	13	Target 1	78.5395	8.99619
24	A24	14	Target 1	70.7092	-0.969068
24	A24	15	Target 1	77.2266	3.4133
24	A24	16	Target 1	108.136	32.1881
24	A24	17	Target 1	86.6313	8.54802
24	A24	18	Target 1	60.0659	-20.1525
24	A24	19	Target 1	54.9584	-27.3949
24	A24	20	Target 1	60.803	-23.6854
24	A24	21	Target 1	80.2315	-6.39189
24	A24	22	Target 1	57.5913	-31.167
24	A24	23	Target 1	57.7766	-33.1168
24	A24	24	Target 1	105.826	12.7972
24	A24	25	Target 1	108.095	12.9317
24	A24	26	Target 1	104.704	7.40583
24	A24	27	Target 1	91.8548	-7.57861
24	A24	28	Target 1	86.4637	-15.1047
24	A24	29	Target 1	121.084	17.3809
24	A24	30	Target 1	77.6016	-28.2368
24	A24	31	Target 1	69.6131	-38.3604
24	A24	32	Target 1	85.8191	-24.2893
24	A24	33	Target 1	66.9318	-45.3116
24	A24	34	Target 1	63.3286	-51.0498
24	A24	35	Target 1	89.2835	-27.23
24	A24	36	Target 1	88.3446	-30.3039
24	A24	37	Target 1	88.4317	-32.3518
24	A24	38	Target 1	87.1106	-35.8079
24	A24	39	Target 1	78.6658	-46.3877
24	A24	40	Target 1	75.9367	-51.2518
25	B1	1	Target 1	-37.8115	-8.46346
25	B1	2	Target 1	-33.8981	-4.52362
25	B1	3	Target 1	-30.192	-0.791069
25	B1	4	Target 1	-32.1329	-2.70556
25	B1	5	Target 1	-38.5653	-9.11147
25	B1	6	Target 1	-39.7195	-10.2393
25	B1	7	Target 1	-32.7229	-3.21616
25	B1	8	Target 1	-28.2182	1.31504
25	B1	9	Target 1	-28.5193	1.04038
25	B1	10	Target 1	-28.1103	1.47579
25	B1	11	Target 1	-28.5588	1.05381
25	B1	12	Target 1	-28.3564	1.28261
25	B1	13	Target 1	-28.2733	1.39217
25	B1	14	Target 1	-29.6787	0.013213
25	B1	15	Target 1	-30.2943	-0.575916
25	B1	16	Target 1	-28.8845	0.860401
25	B1	17	Target 1	-26.2406	3.53072
25	B1	18	Target 1	-25.6536	4.14417
25	B1	19	Target 1	-25.65	4.1742
25	B1	20	Target 1	-25.5053	4.34541
25	B1	21	Target 1	-23.6938	6.18335
25	B1	22	Target 1	-24.2937	5.60993
25	B1	23	Target 1	-24.5094	5.42067
25	B1	24	Target 1	-23.8952	6.06137
25	B1	25	Target 1	-28.6962	1.28675
25	B1	26	Target 1	-30.3881	-0.378661
25	B1	27	Target 1	-27.6132	2.42267
25	B1	28	Target 1	-27.0364	3.02592
25	B1	29	Target 1	-34.6517	-4.56291
25	B1	30	Target 1	-35.9959	-5.8806
25	B1	31	Target 1	-29.8348	0.306908
25	B1	32	Target 1	-28.7624	1.40581
25	B1	33	Target 1	-28.4404	1.75427
25	B1	34	Target 1	-30.3774	-0.156324
25	B1	35	Target 1	-33.6782	-3.43061
25	B1	36	Target 1	-40.7403	-10.4663
25	B1	37	Target 1	-38.9359	-8.63543
25	B1	38	Target 1	-29.5708	0.756112
25	B1	39	Target 1	-29.0648	1.28859
25	B1	40	Target 1	-28.5788	1.80109
26	B2	1	Target 1	-197.949	-55.4048
26	B2	2	Target 1	-248.862	-106.099
26	B2	3	Target 1	-273.002	-130.019
26	B2	4	Target 1	-151.332	-8.13049
26	B2	5	Target 1	-131.366	12.0545
26	B2	6	Target 1	-250.496	-106.856
26	B2	7	Target 1	-272.319	-128.46
26	B2	8	Target 1	-110.799	33.2787
26	B2	9	Target 1	-78.7394	65.5577
26	B2	10	Target 1	-82.3702	62.146
26	B2	11	Target 1	-93.787	50.9482
26	B2	12	Target 1	-93.6812	51.2732
26	B2	13	Target 1	-89.0945	56.079
26	B2	14	Target 1	-104.7	40.6929
26	B2	15	Target 1	-127.22	18.3912
26	B2	16	Target 1	-135.257	10.574
26	B2	17	Target 1	-102.127	43.9224
26	B2	18	Target 1	-90.0876	56.1812
26	B2	19	Target 1	-100.977	45.5112
26	B2	20	Target 1	-115.104	31.6034
26	B2	21	Target 1	-128.22	18.7062
26	B2	22	Target 1	-115.18	31.9646
26	B2	23	Target 1	-89.8698	57.4943
26	B2	24	Target 1	-91.576	56.0072
26	B2	25	Target 1	-227.867	-80.065
26	B2	26	Target 1	-436.876	-288.855
26	B2	27	Target 1	-412.813	-264.572
26	B2	28	Target 1	-361.854	-213.395
26	B2	29	Target 1	-193.995	-45.3169
26	B2	30	Target 1	-297.353	-148.456
26	B2	31	Target 1	-349.046	-199.93
26	B2	32	Target 1	-180.892	-31.5559
26	B2	33	Target 1	-133.003	16.5517
26	B2	34	Target 1	-85.4006	64.3733
26	B2	35	Target 1	-95.5606	54.4324
26	B2	36	Target 1	-135.688	14.524
26	B2	37	Target 1	-673.539	-523.108
26	B2	38	Target 1	-989.042	-838.392
26	B2	39	Target 1	-200.623	-49.7541
26	B2	40	Target 1	-142.868	8.21985
27	B3	1	Target 1	9.77512	2.73528
27	B3	2	Target 1	9.60947	2.55269
27	B3	3	Target 1	9.35128	2.27755
27	B3	4	Target 1	7.16079	0.0701177
27	B3	5	Target 1	7.42314	0.315523
27	B3	6	Target 1	7.13356	0.00900651
27	B3	7	Target 1	6.35282	-0.788682
27	B3	8	Target 1	5.99909	-1.15936
27	B3	9	Target 1	5.9506	-1.22479
27	B3	10	Target 1	6.98969	-0.202644
27	B3	11	Target 1	7.92362	0.714344
27	B3	12	Target 1	7.83153	0.60531
27	B3	13	Target 1	7.79306	0.549906
27	B3	14	Target 1	7.54408	0.283974
27	B3	15	Target 1	7.34344	0.0663959
27	B3	16	Target 1	6.87366	-0.420328
27	B3	17	Target 1	6.90281	-0.408119
27	B3	18	Target 1	7.21164	-0.116234
27	B3	19	Target 1	7.50723	0.162415
27	B3	20	Target 1	7.43809	0.0763338
27	B3	21	Target 1	7.36914	-0.0095607
27	B3	22	Target 1	7.40753	0.0118885
27	B3	23	Target 1	6.37937	-1.03321
27	B3	24	Target 1	5.89983	-1.5297
27	B3	25	Target 1	6.56075	-0.885718
27	B3	26	Target 1	7.33397	-0.129444
27	B3	27	Target 1	7.92898	0.448618
27	B3	28	Target 1	8.08716	0.58986
27	B3	29	Target 1	7.50218	-0.0120679
27	B3	30	Target 1	7.25881	-0.272378
27	B3	31	Target 1	8.24106	0.692929
27	B3	32	Target 1	8.35312	0.788045
27	B3	33	Target 1	7.34399	-0.238029
27	B3	34	Target 1	7.33339	-0.265567
27	B3	35	Target 1	7.65981	0.043914
27	B3	36	Target 1	7.85394	0.221099
27	B3	37	Target 1	7.63483	-0.0149576
27	B3	38	Target 1	8.16445	0.497724
27	B3	39	Target 1	7.96952	0.285843
27	B3	40	Target 1	6.30386	-1.39675
28	B4	1	Target 1	3.19219	0.127896
28	B4	2	Target 1	3.45243	0.349151
28	B4	3	Target 1	3.21129	0.0690265
28	B4	4	Target 1	2.59475	-0.586504
28	B4	5	Target 1	2.68324	-0.537006
28	B4	6	Target 1	2.90473	-0.354505
28	B4	7	Target 1	3.23105	-0.0671671
28	B4	8	Target 1	3.36518	0.0279761
28	B4	9	Target 1	3.39814	0.021948
28	B4	10	Target 1	3.68449	0.269301
28	B4	11	Target 1	3.44313	-0.0110428
28	B4	12	Target 1	4.57523	1.08207
28	B4	13	Target 1	5.01897	1.48682
28	B4	14	Target 1	3.6828	0.111661
28	B4	15	Target 1	3.65847	0.0483429
28	B4	16	Target 1	4.10458	0.455459
28	B4	17	Target 1	3.55378	-0.134328
28	B4	18	Target 1	3.61282	-0.11427
28	B4	19	Target 1	3.65091	-0.115172
28	B4	20	Target 1	3.61577	-0.189304
28	B4	21	Target 1	3.40085	-0.443208
28	B4	22	Target 1	3.63714	-0.245905
28	B4	23	Target 1	3.88531	-0.0367267
28	B4	24	Target 1	3.98418	0.0231572
28	B4	25	Target 1	3.45426	-0.545754
28	B4	26	Target 1	3.36194	-0.677063
28	B4	27	Target 1	3.34845	-0.729536
28	B4	28	Target 1	3.36012	-0.75686
28	B4	29	Target 1	3.94681	-0.209153
28	B4	30	Target 1	4.51169	0.316734
28	B4	31	Target 1	5.05521	0.821262
28	B4	32	Target 1	5.22487	0.951937
28	B4	33	Target 1	5.12898	0.817059
28	B4	34	Target 1	4.45082	0.0999134
28	B4	35	Target 1	3.54074	-0.849158
28	B4	36	Target 1	3.58858	-0.840309
28	B4	37	Target 1	4.32823	-0.139648
28	B4	38	Target 1	4.50576	-0.00110754
28	B4	39	Target 1	4.36557	-0.180287
28	B4	40	Target 1	4.88537	0.300529
29	B5	1	Target 1	2.61302	-0.238508
29	B5	2	Target 1	2.76838	-0.142323
29	B5	3	Target 1	3.78964	0.819768
29	B5	4	Target 1	3.23755	0.208505
29	B5	5	Target 1	2.5171	-0.57112
29	B5	6	Target 1	2.4571	-0.690291
29	B5	7	Target 1	2.36493	-0.841639
29	B5	8	Target 1	2.61912	-0.64662
29	B5	9	Target 1	2.83183	-0.493075
29	B5	10	Target 1	3.1253	-0.25878
29	B5	11	Target 1	3.48337	0.0401145
29	B5	12	Target 1	4.0924	0.589969
29	B5	13	Target 1	4.41746	0.85586
29	B5	14	Target 1	4.62024	0.999463
29	B5	15	Target 1	4.39743	0.717484
29	B5	16	Target 1	3.85321	0.114092
29	B5	17	Target 1	4.91407	1.11578
29	B5	18	Target 1	4.83559	0.978131
29	B5	19	Target 1	3.1206	-0.796037
29	B5	20	Target 1	3.51873	-0.457077
29	B5	21	Target 1	4.2909	0.255919
29	B5	22	Target 1	4.09856	0.00440934
29	B5	23	Target 1	3.12566	-1.02766
29	B5	24	Target 1	3.00451	-1.20799
29	B5	25	Target 1	3.45674	-0.814933
29	B5	26	Target 1	4.12245	-0.208396
29	B5	27	Target 1	4.89739	0.50737
29	B5	28	Target 1	4.90314	0.453952
29	B5	29	Target 1	4.56224	0.0538757
29	B5	30	Target 1	3.71799	-0.849547
29	B5	31	Target 1	4.57841	-0.0482999
29	B5	32	Target 1	5.87132	1.18544
29	B5	33	Target 1	5.85455	1.1095
29	B5	34	Target 1	4.69775	-0.106473
29	B5	35	Target 1	3.87171	-0.99169
29	B5	36	Target 1	3.87454	-1.04803
29	B5	37	Target 1	4.26039	-0.721356
29	B5	38	Target 1	5.48471	0.443796
29	B5	39	Target 1	5.69316	0.593077
29	B5	40	Target 1	4.99007	-0.169186
30	B6	1	Target 1	8.17714	3.13389
30	B6	2	Target 1	7.79107	2.6319
30	B6	3	Target 1	7.28205	2.00695
30	B6	4	Target 1	4.37584	-1.01517
30	B6	5	Target 1	4.28838	-1.21855
30	B6	6	Target 1	5.41656	-0.206298
30	B6	7	Target 1	5.71362	-0.0251604
30	B6	8	Target 1	5.90643	0.0517262
30	B6	9	Target 1	6.43516	0.464541
30	B6	10	Target 1	6.10733	0.020786
30	B6	11	Target 1	5.0651	-1.13737
30	B6	12	Target 1	5.87422	-0.444165
30	B6	13	Target 1	7.94519	1.51088
30	B6	14	Target 1	7.48416	0.933928
30	B6	15	Target 1	5.72405	-0.942098
30	B6	16	Target 1	6.13218	-0.649893
30	B6	17	Target 1	6.7872	-0.110791
30	B6	18	Target 1	6.81082	-0.203097
30	B6	19	Target 1	5.92283	-1.20701
30	B6	20	Target 1	5.7207	-1.52506
30	B6	21	Target 1	4.62774	-2.73394
30	B6	22	Target 1	4.22628	-3.25132
30	B6	23	Target 1	5.22196	-2.37156
30	B6	24	Target 1	5.95637	-1.75307
30	B6	25	Target 1	5.86361	-1.96176
30	B6	26	Target 1	6.18207	-1.75922
30	B6	27	Target 1	6.49511	-1.5621
30	B6	28	Target 1	6.66003	-1.5131
30	B6	29	Target 1	6.92886	-1.3602
30	B6	30	Target 1	6.58088	-1.82409
30	B6	31	Target 1	5.82121	-2.69969
30	B6	32	Target 1	6.3279	-2.30892
30	B6	33	Target 1	7.49923	-1.25351
30	B6	34	Target 1	7.58466	-1.284
30	B6	35	Target 1	7.59759	-1.38699
30	B6	36	Target 1	7.18139	-1.91911
30	B6	37	Target 1	7.57059	-1.64583
30	B6	38	Target 1	9.15951	-0.17284
30	B6	39	Target 1	10.044	0.595739
30	B6	40	Target 1	7.92786	-1.63633
31	B7	1	Target 1	6.67582	0.890575
31	B7	2	Target 1	6.70802	0.671404
31	B7	3	Target 1	6.49433	0.206333
31	B7	4	Target 1	6.15192	-0.387457
31	B7	5	Target 1	5.88613	-0.904626
31	B7	6	Target 1	6.79992	-0.242215
31	B7	7	Target 1	8.06664	0.773122
31	B7	8	Target 1	8.58386	1.03896
31	B7	9	Target 1	8.48879	0.692516
31	B7	10	Target 1	8.15363	0.105972
31	B7	11	Target 1	7.01643	-1.2826
31	B7	12	Target 1	7.03295	-1.51747
31	B7	13	Target 1	7.39988	-1.40192
31	B7	14	Target 1	8.53778	-0.515395
31	B7	15	Target 1	9.47783	0.173277
31	B7	16	Target 1	9.49446	-0.0614775
31	B7	17	Target 1	8.67647	-1.13084
31	B7	18	Target 1	9.36195	-0.69674
31	B7	19	Target 1	9.50803	-0.802042
31	B7	20	Target 1	8.21306	-2.34839
31	B7	21	Target 1	6.80472	-4.00811
31	B7	22	Target 1	6.23495	-4.82926
31	B7	23	Target 1	5.98535	-5.33024
31	B7	24	Target 1	6.11972	-5.44725
31	B7	25	Target 1	6.94598	-4.87237
31	B7	26	Target 1	6.61068	-5.45905
31	B7	27	Target 1	6.75836	-5.56275
31	B7	28	Target 1	8.28363	-4.28886
31	B7	29	Target 1	8.96325	-3.86062
31	B7	30	Target 1	8.59848	-4.47677
31	B7	31	Target 1	7.60212	-5.7245
31	B7	32	Target 1	6.60824	-6.96977
31	B7	33	Target 1	6.36684	-7.46255
31	B7	34	Target 1	6.70322	-7.37754
31	B7	35	Target 1	7.10339	-7.22875
31	B7	36	Target 1	7.40501	-7.17852
31	B7	37	Target 1	6.53137	-8.30353
31	B7	38	Target 1	6.96236	-8.12393
31	B7	39	Target 1	8.98095	-6.35671
31	B7	40	Target 1	11.2701	-4.31894
32	B8	1	Target 1	6.25168	0.790435
32	B8	2	Target 1	6.29424	0.822196
32	B8	3	Target 1	5.99797	0.515127
32	B8	4	Target 1	5.47299	-0.020657
32	B8	5	Target 1	5.27729	-0.227154
32	B8	6	Target 1	4.97338	-0.541862
32	B8	7	Target 1	5.06487	-0.461171
32	B8	8	Target 1	5.35481	-0.182031
32	B8	9	Target 1	5.39846	-0.149185
32	B8	10	Target 1	5.18054	-0.377904
32	B8	11	Target 1	5.48529	-0.0839503
32	B8	12	Target 1	5.74631	0.166267
32	B8	13	Target 1	5.64027	0.0494282
32	B8	14	Target 1	5.63665	0.0350069
32	B8	15	Target 1	5.47062	-0.141818
32	B8	16	Target 1	5.3468	-0.27644
32	B8	17	Target 1	5.07341	-0.560635
32	B8	18	Target 1	5.62475	-0.0200888
32	B8	19	Target 1	6.09312	0.437477
32	B8	20	Target 1	6.23804	0.571601
32	B8	21	Target 1	5.82396	0.146723
32	B8	22	Target 1	5.82362	0.135585
32	B8	23	Target 1	5.68275	-0.0160889
32	B8	24	Target 1	5.66823	-0.0414106
32	B8	25	Target 1	6.00831	0.287871
32	B8	26	Target 1	7.15305	1.42182
32	B8	27	Target 1	7.14971	1.40768
32	B8	28	Target 1	6.10035	0.347509
32	B8	29	Target 1	5.66394	-0.0996928
32	B8	30	Target 1	5.99267	0.218231
32	B8	31	Target 1	6.19469	0.409452
32	B8	32	Target 1	6.13625	0.340217
32	B8	33	Target 1	5.24608	-0.560761
32	B8	34	Target 1	5.05373	-0.763901
32	B8	35	Target 1	5.39549	-0.432946
32	B8	36	Target 1	5.27204	-0.567197
32	B8	37	Target 1	5.46769	-0.382348
32	B8	38	Target 1	5.54987	-0.310961
32	B8	39	Target 1	5.59985	-0.271782
32	B8	40	Target 1	5.50132	-0.381116
33	B9	1	Target 1	11.1541	2.86651
33	B9	2	Target 1	10.443	2.10569
33	B9	3	Target 1	10.5116	2.12459
33	B9	4	Target 1	9.22173	0.784971
33	B9	5	Target 1	6.8935	-1.59298
33	B9	6	Target 1	6.92305	-1.61314
33	B9	7	Target 1	7.75723	-0.82866
33	B9	8	Target 1	9.34931	0.713707
33	B9	9	Target 1	9.5211	0.835782
33	B9	10	Target 1	7.45834	-1.27669
33	B9	11	Target 1	7.98528	-0.799454
33	B9	12	Target 1	9.21362	0.37917
33	B9	13	Target 1	9.37317	0.489008
33	B9	14	Target 1	9.63608	0.702209
33	B9	15	Target 1	9.94298	0.959398
33	B9	16	Target 1	10.222	1.18868
33	B9	17	Target 1	9.51665	0.433644
33	B9	18	Target 1	7.71517	-1.41755
33	B9	19	Target 1	7.50434	-1.67808
33	B9	20	Target 1	8.69688	-0.535257
33	B9	21	Target 1	9.30326	0.0214168
33	B9	22	Target 1	9.22259	-0.108963
33	B9	23	Target 1	9.18647	-0.194796
33	B9	24	Target 1	9.08005	-0.350925
33	B9	25	Target 1	10.734	1.25329
33	B9	26	Target 1	10.955	1.42464
33	B9	27	Target 1	8.66609	-0.91402
33	B9	28	Target 1	8.75097	-0.878844
33	B9	29	Target 1	9.91603	0.236504
33	B9	30	Target 1	10.6164	0.887118
33	B9	31	Target 1	12.4772	2.69829
33	B9	32	Target 1	11.943	2.11438
33	B9	33	Target 1	8.7211	-1.15727
33	B9	34	Target 1	7.60765	-2.32043
33	B9	35	Target 1	6.78037	-3.19742
33	B9	36	Target 1	7.92119	-2.10632
33	B9	37	Target 1	9.64143	-0.435781
33	B9	38	Target 1	10.749	0.622071
33	B9	39	Target 1	9.93219	-0.244446
33	B9	40	Target 1	7.22206	-3.00428
34	B10	1	Target 1	-14.422	28.7827
34	B10	2	Target 1	-15.8877	27.317
34	B10	3	Target 1	-24.6932	18.5115
34	B10	4	Target 1	-61.7163	-18.5115
34	B10	5	Target 1	-168.534	-125.33
34	B10	6	Target 1	-28.7698	14.4349
34	B10	7	Target 1	-17.9728	25.2319
34	B10	8	Target 1	-17.8815	25.3232
34	B10	9	Target 1	-28.0751	15.1296
34	B10	10	Target 1	136.86	180.065
34	B10	11	Target 1	258.142	301.347
34	B10	12	Target 1	-25.0171	18.1876
34	B10	13	Target 1	-20.45	22.7548
34	B10	14	Target 1	-22.6121	20.5926
34	B10	15	Target 1	-32.7158	10.489
34	B10	16	Target 1	-25.402	17.8028
34	B10	17	Target 1	-22.7118	20.493
34	B10	18	Target 1	-50.3216	-7.11685
34	B10	19	Target 1	292.666	335.87
34	B10	20	Target 1	75.2926	118.497
34	B10	21	Target 1	-488.354	-445.149
34	B10	22	Target 1	-92.604	-49.3992
34	B10	23	Target 1	66.7837	109.988
34	B10	24	Target 1	87.4355	130.64
34	B10	25	Target 1	-588.668	-545.463
34	B10	26	Target 1	-33.3386	9.8661
34	B10	27	Target 1	-24.8949	18.3098
34	B10	28	Target 1	-19.5578	23.647
34	B10	29	Target 1	-28.3146	14.8902
34	B10	30	Target 1	-28.0755	15.1292
34	B10	31	Target 1	-24.7971	18.4077
34	B10	32	Target 1	-22.081	21.1237
34	B10	33	Target 1	-25.6048	17.5999
34	B10	34	Target 1	-22.5922	20.6126
34	B10	35	Target 1	-39.1827	4.022
34	B10	36	Target 1	-86.9914	-43.7867
34	B10	37	Target 1	-12.6912	30.5135
34	B10	38	Target 1	-12.7013	30.5035
34	B10	39	Target 1	186.925	230.13
34	B10	40	Target 1	116.637	159.842
35	B11	1	Target 1	9.10888	-1.47033
35	B11	2	Target 1	9.35336	-1.19852
35	B11	3	Target 1	10.5863	0.0617906
35	B11	4	Target 1	9.7641	-0.733125
35	B11	5	Target 1	8.05384	-2.41605
35	B11	6	Target 1	9.382	-1.06056
35	B11	7	Target 1	10.9351	0.5199
35	B11	8	Target 1	10.9893	0.601362
35	B11	9	Target 1	11.3544	0.993871
35	B11	10	Target 1	11.6601	1.32682
35	B11	11	Target 1	10.91	0.604127
35	B11	12	Target 1	10.0956	-0.182977
35	B11	13	Target 1	10.3206	0.0693246
35	B11	14	Target 1	11.5908	1.36691
35	B11	15	Target 1	11.4519	1.25533
35	B11	16	Target 1	9.59647	-0.572788
35	B11	17	Target 1	8.8532	-1.28874
35	B11	18	Target 1	10.9709	0.856293
35	B11	19	Target 1	11.244	1.15676
35	B11	20	Target 1	9.23764	-0.822302
35	B11	21	Target 1	9.21341	-0.819207
35	B11	22	Target 1	10.1684	0.163107
35	B11	23	Target 1	10.7262	0.748205
35	B11	24	Target 1	9.26521	-0.685409
35	B11	25	Target 1	8.70754	-1.21575
35	B11	26	Target 1	7.63247	-2.26349
35	B11	27	Target 1	9.23483	-0.633807
35	B11	28	Target 1	10.8818	1.04052
35	B11	29	Target 1	11.9765	2.16249
35	B11	30	Target 1	10.5806	0.793921
35	B11	31	Target 1	10.0377	0.278431
35	B11	32	Target 1	9.85778	0.125792
35	B11	33	Target 1	10.4474	0.742759
35	B11	34	Target 1	9.886	0.208675
35	B11	35	Target 1	7.26781	-2.38218
35	B11	36	Target 1	7.45902	-2.16364
35	B11	37	Target 1	8.3185	-1.27683
35	B11	38	Target 1	8.49867	-1.06933
35	B11	39	Target 1	8.76777	-0.772904
35	B11	40	Target 1	7.62765	-1.8857
36	B12	1	Target 1	7.39013	1.40786
36	B12	2	Target 1	5.85539	-0.148137
36	B12	3	Target 1	5.40188	-0.622899
36	B12	4	Target 1	4.71556	-1.33047
36	B12	5	Target 1	4.83634	-1.23095
36	B12	6	Target 1	5.03241	-1.05614
36	B12	7	Target 1	5.01218	-1.09763
36	B12	8	Target 1	5.34505	-0.786011
36	B12	9	Target 1	5.10311	-1.04921
36	B12	10	Target 1	4.78851	-1.38506
36	B12	11	Target 1	6.33607	0.141241
36	B12	12	Target 1	8.37665	2.16057
36	B12	13	Target 1	9.34653	3.1092
36	B12	14	Target 1	11.4608	5.20223
36	B12	15	Target 1	8.95549	2.67564
36	B12	16	Target 1	4.94315	-1.35796
36	B12	17	Target 1	7.18921	0.866848
36	B12	18	Target 1	8.76517	2.42155
36	B12	19	Target 1	7.14212	0.777243
36	B12	20	Target 1	5.88077	-0.505355
36	B12	21	Target 1	5.43808	-0.969301
36	B12	22	Target 1	5.77517	-0.653467
36	B12	23	Target 1	4.91092	-1.53898
36	B12	24	Target 1	4.45126	-2.01989
36	B12	25	Target 1	5.28846	-1.20395
36	B12	26	Target 1	6.24993	-0.263735
36	B12	27	Target 1	7.06346	0.528538
36	B12	28	Target 1	6.89225	0.336073
36	B12	29	Target 1	5.42931	-1.14812
36	B12	30	Target 1	5.49805	-1.10064
36	B12	31	Target 1	6.46107	-0.158871
36	B12	32	Target 1	7.70328	1.06208
36	B12	33	Target 1	9.66246	3.00001
36	B12	34	Target 1	9.74347	3.05976
36	B12	35	Target 1	7.53283	0.82787
36	B12	36	Target 1	7.42519	0.698967
36	B12	37	Target 1	7.28528	0.537806
36	B12	38	Target 1	7.1471	0.378367
36	B12	39	Target 1	6.84864	0.0586513
36	B12	40	Target 1	6.51069	-0.300548
37	B13	1	Target 1	7.89219	2.35024
37	B13	2	Target 1	7.425	1.72987
37	B13	3	Target 1	6.30361	0.455295
37	B13	4	Target 1	5.08797	-0.913522
37	B13	5	Target 1	5.11608	-1.03859
37	B13	6	Target 1	5.95847	-0.349378
37	B13	7	Target 1	7.23729	0.776258
37	B13	8	Target 1	7.57489	0.960682
37	B13	9	Target 1	6.02833	-0.739052
37	B13	10	Target 1	5.51313	-1.40744
37	B13	11	Target 1	6.14206	-0.93169
37	B13	12	Target 1	6.84693	-0.379991
37	B13	13	Target 1	7.14479	-0.23531
37	B13	14	Target 1	8.70892	1.17563
37	B13	15	Target 1	10.2749	2.58843
37	B13	16	Target 1	9.56338	1.72374
37	B13	17	Target 1	9.8166	1.82378
37	B13	18	Target 1	9.31452	1.16852
37	B13	19	Target 1	7.04116	-1.25802
37	B13	20	Target 1	6.71717	-1.73519
37	B13	21	Target 1	7.26572	-1.33981
37	B13	22	Target 1	9.07998	0.321267
37	B13	23	Target 1	10.2637	1.35176
37	B13	24	Target 1	7.86112	-1.20395
37	B13	25	Target 1	9.11359	-0.104661
37	B13	26	Target 1	9.99084	0.619407
37	B13	27	Target 1	8.19644	-1.32818
37	B13	28	Target 1	9.93063	0.252841
37	B13	29	Target 1	15.696	5.86508
37	B13	30	Target 1	17.8768	7.89263
37	B13	31	Target 1	33.9048	23.7675
37	B13	32	Target 1	42.0446	31.754
37	B13	33	Target 1	27.6896	17.2459
37	B13	34	Target 1	23.9803	13.3835
37	B13	35	Target 1	15.8748	5.12475
37	B13	36	Target 1	12.5326	1.62939
37	B13	37	Target 1	17.1492	6.0928
37	B13	38	Target 1	23.8674	12.6578
37	B13	39	Target 1	31.4455	20.0827
37	B13	40	Target 1	51.0116	39.4956
38	B14	1	Target 1	4.74779	0.791152
38	B14	2	Target 1	4.34687	0.323779
38	B14	3	Target 1	4.79322	0.70367
38	B14	4	Target 1	4.85354	0.697535
38	B14	5	Target 1	4.41444	0.191973
38	B14	6	Target 1	3.98568	-0.303244
38	B14	7	Target 1	3.66025	-0.695129
38	B14	8	Target 1	3.82724	-0.594597
38	B14	9	Target 1	4.64476	0.156468
38	B14	10	Target 1	4.8266	0.271852
38	B14	11	Target 1	4.55878	-0.0624264
38	B14	12	Target 1	4.45675	-0.230908
38	B14	13	Target 1	5.03314	0.279022
38	B14	14	Target 1	5.30101	0.480433
38	B14	15	Target 1	5.107	0.219971
38	B14	16	Target 1	5.2154	0.261916
38	B14	17	Target 1	5.41944	0.399495
38	B14	18	Target 1	5.11098	0.0245802
38	B14	19	Target 1	4.89425	-0.258608
38	B14	20	Target 1	4.85877	-0.360545
38	B14	21	Target 1	4.93543	-0.350344
38	B14	22	Target 1	4.79482	-0.557404
38	B14	23	Target 1	4.86134	-0.55734
38	B14	24	Target 1	4.94895	-0.536195
38	B14	25	Target 1	4.68822	-0.863373
38	B14	26	Target 1	4.70046	-0.917593
38	B14	27	Target 1	5.57383	-0.110681
38	B14	28	Target 1	6.08701	0.336039
38	B14	29	Target 1	5.8161	-0.00132141
38	B14	30	Target 1	6.2335	0.349623
38	B14	31	Target 1	5.9562	0.00586481
38	B14	32	Target 1	5.94127	-0.0755192
38	B14	33	Target 1	6.58106	0.497814
38	B14	34	Target 1	7.55865	1.40895
38	B14	35	Target 1	7.19554	0.97938
38	B14	36	Target 1	6.58063	0.298014
38	B14	37	Target 1	6.05231	-0.296767
38	B14	38	Target 1	5.86842	-0.547111
38	B14	39	Target 1	6.2385	-0.243493
38	B14	40	Target 1	7.31216	0.763717
39	B15	1	Target 1	5.8838	1.77049
39	B15	2	Target 1	6.00634	1.41541
39	B15	3	Target 1	5.35781	0.289257
39	B15	4	Target 1	5.20833	-0.337837
39	B15	5	Target 1	5.77295	-0.250837
39	B15	6	Target 1	6.45916	-0.0422561
39	B15	7	Target 1	7.54104	0.562012
39	B15	8	Target 1	8.21197	0.755315
39	B15	9	Target 1	5.44373	-2.49054
39	B15	10	Target 1	5.73867	-2.67323
39	B15	11	Target 1	8.19527	-0.69424
39	B15	12	Target 1	10.8185	1.4514
39	B15	13	Target 1	12.8868	3.042
39	B15	14	Target 1	12.803	2.48057
39	B15	15	Target 1	15.0951	4.29511
39	B15	16	Target 1	10.0222	-1.25543
39	B15	17	Target 1	6.62393	-5.13131
39	B15	18	Target 1	6.8771	-5.35576
39	B15	19	Target 1	9.14999	-3.56048
39	B15	20	Target 1	16.4725	3.28438
39	B15	21	Target 1	25.5037	11.838
39	B15	22	Target 1	12.2767	-1.86667
39	B15	23	Target 1	16.68	2.05905
39	B15	24	Target 1	-615.459	-630.557
39	B15	25	Target 1	-24.0829	-39.6591
39	B15	26	Target 1	-11.0804	-27.1342
39	B15	27	Target 1	-4.59242	-21.1239
39	B15	28	Target 1	-2.61036	-19.6194
39	B15	29	Target 1	-3.18417	-20.6709
39	B15	30	Target 1	-4.33036	-22.2947
39	B15	31	Target 1	-3.31967	-21.7616
39	B15	32	Target 1	-4.13892	-23.0585
39	B15	33	Target 1	-11.9963	-31.3935
39	B15	34	Target 1	-9.78313	-29.6579
39	B15	35	Target 1	-3.99889	-24.3513
39	B15	36	Target 1	-2.57512	-23.4051
39	B15	37	Target 1	-1.48992	-22.7976
39	B15	38	Target 1	-1.11709	-22.9024
39	B15	39	Target 1	-1.68539	-23.9483
39	B15	40	Target 1	-3.66911	-26.4096
40	B16	1	Target 1	4.17976	1.00435
40	B16	2	Target 1	4.10645	0.926757
40	B16	3	Target 1	3.63172	0.447734
40	B16	4	Target 1	3.21285	0.0245802
40	B16	5	Target 1	3.4914	0.298844
40	B16	6	Target 1	3.67791	0.481062
40	B16	7	Target 1	3.33912	0.137991
40	B16	8	Target 1	3.0394	-0.166021
40	B16	9	Target 1	2.88394	-0.325768
40	B16	10	Target 1	2.97332	-0.24067
40	B16	11	Target 1	2.53482	-0.683462
40	B16	12	Target 1	2.53448	-0.68809
40	B16	13	Target 1	2.8903	-0.336549
40	B16	14	Target 1	3.3078	0.0766596
40	B16	15	Target 1	3.74508	0.509655
40	B16	16	Target 1	3.63946	0.399749
40	B16	17	Target 1	3.4046	0.160602
40	B16	18	Target 1	2.9824	-0.265885
40	B16	19	Target 1	2.79613	-0.45645
40	B16	20	Target 1	2.94267	-0.31419
40	B16	21	Target 1	3.51442	0.253268
40	B16	22	Target 1	3.59963	0.334196
40	B16	23	Target 1	3.40168	0.131956
40	B16	24	Target 1	3.1177	-0.156316
40	B16	25	Target 1	3.09293	-0.185367
40	B16	26	Target 1	3.60056	0.317976
40	B16	27	Target 1	3.60753	0.320659
40	B16	28	Target 1	3.40072	0.109562
40	B16	29	Target 1	3.10972	-0.185725
40	B16	30	Target 1	3.25177	-0.0479674
40	B16	31	Target 1	3.32536	0.0213386
40	B16	32	Target 1	3.15524	-0.153073
40	B16	33	Target 1	2.78097	-0.531623
40	B16	34	Target 1	2.83037	-0.486515
40	B16	35	Target 1	2.95626	-0.36491
40	B16	36	Target 1	2.20008	-1.12538
40	B16	37	Target 1	2.11905	-1.21069
40	B16	38	Target 1	2.19731	-1.13672
40	B16	39	Target 1	2.44807	-0.890251
40	B16	40	Target 1	3.30797	-0.0346341
41	B17	1	Target 1	5.47988	1.15544
41	B17	2	Target 1	5.78517	1.38619
41	B17	3	Target 1	6.15001	1.67649
41	B17	4	Target 1	3.73842	-0.809633
41	B17	5	Target 1	3.14899	-1.4736
41	B17	6	Target 1	4.12974	-0.567383
41	B17	7	Target 1	4.43701	-0.334658
41	B17	8	Target 1	5.4154	0.569199
41	B17	9	Target 1	6.32396	1.40322
41	B17	10	Target 1	5.75388	0.758603
41	B17	11	Target 1	3.84757	-1.22224
41	B17	12	Target 1	3.96559	-1.17876
41	B17	13	Target 1	4.90539	-0.313496
41	B17	14	Target 1	5.40913	0.115706
41	B17	15	Target 1	5.50695	0.138992
41	B17	16	Target 1	4.93798	-0.504519
41	B17	17	Target 1	6.92835	1.41132
41	B17	18	Target 1	7.96059	2.36902
41	B17	19	Target 1	6.83917	1.17307
41	B17	20	Target 1	6.54553	0.804882
41	B17	21	Target 1	6.44353	0.628354
41	B17	22	Target 1	6.94435	1.05464
41	B17	23	Target 1	7.2276	1.26335
41	B17	24	Target 1	7.88671	1.84792
41	B17	25	Target 1	8.05605	1.94272
41	B17	26	Target 1	8.31473	2.12687
41	B17	27	Target 1	9.52399	3.26159
41	B17	28	Target 1	8.64084	2.3039
41	B17	29	Target 1	9.52886	3.11739
41	B17	30	Target 1	9.52733	3.04131
41	B17	31	Target 1	6.08297	-0.477578
41	B17	32	Target 1	6.71674	0.0816492
41	B17	33	Target 1	5.25285	-1.45677
41	B17	34	Target 1	4.20593	-2.57824
41	B17	35	Target 1	3.86143	-2.99727
41	B17	36	Target 1	4.69127	-2.24197
41	B17	37	Target 1	10.1612	3.15345
41	B17	38	Target 1	-31.9299	-39.0123
41	B17	39	Target 1	-25.7416	-32.8985
41	B17	40	Target 1	21.9542	14.7228
42	B18	1	Target 1	8.3922	2.33192
42	B18	2	Target 1	8.23397	2.21035
42	B18	3	Target 1	5.44815	-0.538796
42	B18	4	Target 1	4.66471	-1.28557
42	B18	5	Target 1	5.09914	-0.814475
42	B18	6	Target 1	4.01163	-1.86532
42	B18	7	Target 1	3.78239	-2.05789
42	B18	8	Target 1	5.344	-0.459617
42	B18	9	Target 1	5.79528	0.0283315
42	B18	10	Target 1	4.7592	-0.971083
42	B18	11	Target 1	5.11	-0.58361
42	B18	12	Target 1	10.5899	4.93294
42	B18	13	Target 1	11.6569	6.03663
42	B18	14	Target 1	8.01225	2.42864
42	B18	15	Target 1	6.50092	0.953976
42	B18	16	Target 1	6.25519	0.744915
42	B18	17	Target 1	5.27952	-0.194083
42	B18	18	Target 1	4.52101	-0.915929
42	B18	19	Target 1	4.58165	-0.818626
42	B18	20	Target 1	4.79259	-0.571016
42	B18	21	Target 1	4.86395	-0.46299
42	B18	22	Target 1	4.29062	-0.999654
42	B18	23	Target 1	4.24547	-1.00813
42	B18	24	Target 1	4.74066	-0.476279
42	B18	25	Target 1	5.34539	0.165116
42	B18	26	Target 1	3.87611	-1.26749
42	B18	27	Target 1	3.99569	-1.11124
42	B18	28	Target 1	5.6817	0.611432
42	B18	29	Target 1	5.31573	0.282127
42	B18	30	Target 1	6.45018	1.45325
42	B18	31	Target 1	6.90165	1.94139
42	B18	32	Target 1	5.36339	0.439786
42	B18	33	Target 1	4.71513	-0.1718
42	B18	34	Target 1	4.71075	-0.139511
42	B18	35	Target 1	3.02416	-1.78944
42	B18	36	Target 1	2.75945	-2.01748
42	B18	37	Target 1	3.5733	-1.16696
42	B18	38	Target 1	4.63702	-0.0665794
42	B18	39	Target 1	4.81831	0.151385
42	B18	40	Target 1	4.14633	-0.483933
43	B19	1	Target 1	7.73711	1.04677
43	B19	2	Target 1	6.6467	-0.194742
43	B19	3	Target 1	5.37017	-1.62237
43	B19	4	Target 1	5.02463	-2.11902
43	B19	5	Target 1	5.28166	-2.01308
43	B19	6	Target 1	10.6866	3.24075
43	B19	7	Target 1	12.2728	4.67581
43	B19	8	Target 1	8.33267	0.584619
43	B19	9	Target 1	6.35022	-1.54893
43	B19	10	Target 1	5.81149	-2.23877
43	B19	11	Target 1	7.72097	-0.480383
43	B19	12	Target 1	10.0454	1.6929
43	B19	13	Target 1	10.6282	2.12467
43	B19	14	Target 1	8.28766	-0.366997
43	B19	15	Target 1	9.58777	0.782004
43	B19	16	Target 1	9.22527	0.268404
43	B19	17	Target 1	6.12836	-2.9796
43	B19	18	Target 1	6.38709	-2.87197
43	B19	19	Target 1	6.69728	-2.71288
43	B19	20	Target 1	6.47245	-3.08882
43	B19	21	Target 1	6.80752	-2.90485
43	B19	22	Target 1	6.99301	-2.87047
43	B19	23	Target 1	5.28129	-4.73329
43	B19	24	Target 1	4.44233	-5.72335
43	B19	25	Target 1	5.94345	-4.37333
43	B19	26	Target 1	8.18207	-2.28581
43	B19	27	Target 1	8.46208	-2.1569
43	B19	28	Target 1	8.51585	-2.25423
43	B19	29	Target 1	7.47035	-3.45084
43	B19	30	Target 1	8.32272	-2.74957
43	B19	31	Target 1	9.13663	-2.08676
43	B19	32	Target 1	8.57293	-2.80156
43	B19	33	Target 1	5.53335	-5.99224
43	B19	34	Target 1	5.18782	-6.48887
43	B19	35	Target 1	5.82261	-6.00518
43	B19	36	Target 1	6.83422	-5.14468
43	B19	37	Target 1	6.42245	-5.70755
43	B19	38	Target 1	6.45339	-5.82771
43	B19	39	Target 1	7.40739	-5.02481
43	B19	40	Target 1	7.75076	-4.83255
44	B20	1	Target 1	4.08176	0.810459
44	B20	2	Target 1	3.62131	0.353591
44	B20	3	Target 1	3.56844	0.304309
44	B20	4	Target 1	2.46971	-0.790843
44	B20	5	Target 1	2.37258	-0.884394
44	B20	6	Target 1	3.12289	-0.130502
44	B20	7	Target 1	4.53548	1.28567
44	B20	8	Target 1	4.65071	1.40449
44	B20	9	Target 1	3.8323	0.589658
44	B20	10	Target 1	3.65345	0.41439
44	B20	11	Target 1	3.22066	-0.01482
44	B20	12	Target 1	3.13606	-0.0958376
44	B20	13	Target 1	2.94265	-0.285673
44	B20	14	Target 1	2.36356	-0.861176
44	B20	15	Target 1	2.35236	-0.868798
44	B20	16	Target 1	2.61651	-0.60107
44	B20	17	Target 1	2.85721	-0.356786
44	B20	18	Target 1	2.79093	-0.419478
44	B20	19	Target 1	2.55527	-0.651559
44	B20	20	Target 1	3.41294	0.209692
44	B20	21	Target 1	3.35367	0.153997
44	B20	22	Target 1	3.22144	0.0253546
44	B20	23	Target 1	3.10681	-0.0856962
44	B20	24	Target 1	4.11672	0.927799
44	B20	25	Target 1	4.2064	1.02105
44	B20	26	Target 1	3.03355	-0.148209
44	B20	27	Target 1	2.77319	-0.404991
44	B20	28	Target 1	3.00493	-0.16967
44	B20	29	Target 1	3.43854	0.267521
44	B20	30	Target 1	3.28394	0.116501
44	B20	31	Target 1	3.94979	0.785931
44	B20	32	Target 1	3.95373	0.793454
44	B20	33	Target 1	2.90578	-0.250913
44	B20	34	Target 1	1.87371	-1.2794
44	B20	35	Target 1	1.89509	-1.25444
44	B20	36	Target 1	2.67395	-0.471996
44	B20	37	Target 1	3.24821	0.105842
44	B20	38	Target 1	3.27831	0.139528
44	B20	39	Target 1	3.28689	0.151684
44	B20	40	Target 1	3.26092	0.129297
45	B21	1	Target 1	-2476.72	-2494.88
45	B21	2	Target 1	62.9986	44.8436
45	B21	3	Target 1	32.4293	14.2742
45	B21	4	Target 1	11.6761	-6.47893
45	B21	5	Target 1	10.3597	-7.79531
45	B21	6	Target 1	9.04367	-9.11138
45	B21	7	Target 1	11.2089	-6.94615
45	B21	8	Target 1	12.2275	-5.92757
45	B21	9	Target 1	9.96483	-8.19022
45	B21	10	Target 1	11.4229	-6.73211
45	B21	11	Target 1	12.276	-5.87907
45	B21	12	Target 1	19.6697	1.51463
45	B21	13	Target 1	29.2273	11.0723
45	B21	14	Target 1	22.3162	4.16114
45	B21	15	Target 1	17.7869	-0.368192
45	B21	16	Target 1	18.6249	0.469821
45	B21	17	Target 1	10.5722	-7.58287
45	B21	18	Target 1	8.73654	-9.41852
45	B21	19	Target 1	10.1763	-7.97875
45	B21	20	Target 1	13.3239	-4.83115
45	B21	21	Target 1	14.3801	-3.77495
45	B21	22	Target 1	10.6518	-7.50329
45	B21	23	Target 1	8.41702	-9.73804
45	B21	24	Target 1	7.36651	-10.7885
45	B21	25	Target 1	9.19814	-8.95692
45	B21	26	Target 1	13.7908	-4.3643
45	B21	27	Target 1	18.0847	-0.0703691
45	B21	28	Target 1	22.6426	4.48753
45	B21	29	Target 1	22.2817	4.12666
45	B21	30	Target 1	11.0601	-7.09493
45	B21	31	Target 1	10.0595	-8.09555
45	B21	32	Target 1	13.3156	-4.83942
45	B21	33	Target 1	37.7452	19.5902
45	B21	34	Target 1	33.2412	15.0861
45	B21	35	Target 1	9.84061	-8.31444
45	B21	36	Target 1	8.72483	-9.43022
45	B21	37	Target 1	10.7455	-7.40953
45	B21	38	Target 1	14.0716	-4.08347
45	B21	39	Target 1	13.6724	-4.48266
45	B21	40	Target 1	8.94218	-9.21288
46	B22	1	Target 1	0.296431	-0.397522
46	B22	2	Target 1	0.21986	-0.480072
46	B22	3	Target 1	-0.212386	-0.918297
46	B22	4	Target 1	-0.178523	-0.890414
46	B22	5	Target 1	0.355524	-0.362347
46	B22	6	Target 1	0.84867	0.12482
46	B22	7	Target 1	1.05651	0.326684
46	B22	8	Target 1	1.24872	0.51291
46	B22	9	Target 1	1.88889	1.1471
46	B22	10	Target 1	1.69151	0.943746
46	B22	11	Target 1	0.486651	-0.267097
46	B22	12	Target 1	0.343366	-0.416361
46	B22	13	Target 1	0.966748	0.201041
46	B22	14	Target 1	1.06667	0.294982
46	B22	15	Target 1	0.992922	0.215257
46	B22	16	Target 1	0.496102	-0.287543
46	B22	17	Target 1	0.239796	-0.549828
46	B22	18	Target 1	0.371991	-0.423613
46	B22	19	Target 1	1.14678	0.345198
46	B22	20	Target 1	1.51764	0.710075
46	B22	21	Target 1	1.32168	0.508136
46	B22	22	Target 1	0.90462	0.0850985
46	B22	23	Target 1	0.665575	-0.159926
46	B22	24	Target 1	0.615764	-0.215716
46	B22	25	Target 1	0.500722	-0.336738
46	B22	26	Target 1	0.256271	-0.587168
46	B22	27	Target 1	0.30638	-0.543039
46	B22	28	Target 1	1.05417	0.198776
46	B22	29	Target 1	1.26467	0.403296
46	B22	30	Target 1	1.58338	0.716022
46	B22	31	Target 1	2.55788	1.68455
46	B22	32	Target 1	2.88438	2.00507
46	B22	33	Target 1	2.09964	1.21435
46	B22	34	Target 1	1.09301	0.201737
46	B22	35	Target 1	0.673751	-0.223504
46	B22	36	Target 1	0.901754	-0.0014802
46	B22	37	Target 1	0.715483	-0.193731
46	B22	38	Target 1	0.88469	-0.0305031
46	B22	39	Target 1	1.95364	1.03247
46	B22	40	Target 1	1.76297	0.835816
47	B23	1	Target 1	6.38512	33.8176
47	B23	2	Target 1	7.32227	30.9225
47	B23	3	Target 1	5.71122	25.4792
47	B23	4	Target 1	5.87289	21.8086
47	B23	5	Target 1	13.9372	26.0406
47	B23	6	Target 1	18.9746	27.2458
47	B23	7	Target 1	-157.04	-152.601
47	B23	8	Target 1	20.275	20.8817
47	B23	9	Target 1	19.7427	16.5172
47	B23	10	Target 1	-12.1212	-19.179
47	B23	11	Target 1	-15.0332	-25.9232
47	B23	12	Target 1	28.3393	13.6171
47	B23	13	Target 1	10.0726	-8.4819
47	B23	14	Target 1	6.88933	-15.4974
47	B23	15	Target 1	4.1513	-22.0677
47	B23	16	Target 1	4.80061	-25.2507
47	B23	17	Target 1	23.0812	-10.8023
47	B23	18	Target 1	304.565	266.849
47	B23	19	Target 1	-65.036	-106.584
47	B23	20	Target 1	21.4332	-23.9471
47	B23	21	Target 1	13.6787	-35.5338
47	B23	22	Target 1	128.536	75.4915
47	B23	23	Target 1	93.6166	36.7396
47	B23	24	Target 1	82.4142	21.705
47	B23	25	Target 1	20.5514	-43.9901
47	B23	26	Target 1	5.85676	-62.517
47	B23	27	Target 1	6.58968	-65.6163
47	B23	28	Target 1	11.5616	-64.4767
47	B23	29	Target 1	9.50904	-70.3615
47	B23	30	Target 1	9.2205	-74.4823
47	B23	31	Target 1	17.133	-70.402
47	B23	32	Target 1	16.9075	-74.4597
47	B23	33	Target 1	14.7534	-80.4461
47	B23	34	Target 1	11.856	-87.1758
47	B23	35	Target 1	12.6668	-90.1972
47	B23	36	Target 1	21.3499	-85.3464
47	B23	37	Target 1	23.3795	-87.1491
47	B23	38	Target 1	12.368	-101.993
47	B23	39	Target 1	7.25924	-110.934
47	B23	40	Target 1	5.97532	-116.05
48	B24	1	Target 1	3.05994	0.916276
48	B24	2	Target 1	2.9067	0.997833
48	B24	3	Target 1	0.999405	-0.674667
48	B24	4	Target 1	-0.491013	-1.93029
48	B24	5	Target 1	-1.11458	-2.31906
48	B24	6	Target 1	0.466188	-0.503497
48	B24	7	Target 1	0.419998	-0.314891
48	B24	8	Target 1	-0.531287	-1.03138
48	B24	9	Target 1	-0.858896	-1.12419
48	B24	10	Target 1	-0.970317	-1.00082
48	B24	11	Target 1	-0.378307	-0.174014
48	B24	12	Target 1	0.323355	0.762444
48	B24	13	Target 1	1.52465	2.19853
48	B24	14	Target 1	-0.896548	0.0121321
48	B24	15	Target 1	-1.56151	-0.418033
48	B24	16	Target 1	-1.79685	-0.418574
48	B24	17	Target 1	-2.01255	-0.399488
48	B24	18	Target 1	-1.84541	0.00245577
48	B24	19	Target 1	-1.3648	0.71786
48	B24	20	Target 1	-0.294198	2.02326
48	B24	21	Target 1	0.466669	3.01892
48	B24	22	Target 1	-0.242044	2.545
48	B24	23	Target 1	-2.79136	0.230478
48	B24	24	Target 1	-3.21105	0.0455849
48	B24	25	Target 1	-1.63227	1.85916
48	B24	26	Target 1	-1.15234	2.57389
48	B24	27	Target 1	-1.03113	2.9299
48	B24	28	Target 1	-0.935671	3.26015
48	B24	29	Target 1	-3.23119	1.19943
48	B24	30	Target 1	-11.7002	-7.03479
48	B24	31	Target 1	-8.99133	-4.09113
48	B24	32	Target 1	-5.47307	-0.338066
48	B24	33	Target 1	-0.930826	4.43897
48	B24	34	Target 1	-0.556802	5.04779
48	B24	35	Target 1	-3.17291	2.66648
48	B24	36	Target 1	-8.51017	-2.43599
48	B24	37	Target 1	-6.66455	-0.355575
48	B24	38	Target 1	-12.6054	-6.06165
48	B24	39	Target 1	-11.6849	-4.90632
48	B24	40	Target 1	-1.96725	5.04612
49	C1	1	Target 1	-0.0536202	0.0200767
49	C1	2	Target 1	-0.0537128	0.015013
49	C1	3	Target 1	-0.0522101	0.0115445
49	C1	4	Target 1	-0.0506255	0.0081579
49	C1	5	Target 1	-0.0495397	0.00427253
49	C1	6	Target 1	-0.0520139	-0.0031728
49	C1	7	Target 1	-0.050982	-0.00711213
49	C1	8	Target 1	-0.0466248	-0.0077261
49	C1	9	Target 1	-0.0396993	-0.00577174
49	C1	10	Target 1	-0.0363949	-0.00743848
49	C1	11	Target 1	-0.0292917	-0.00530653
49	C1	12	Target 1	-0.0231668	-0.0041527
49	C1	13	Target 1	-0.0186196	-0.00457671
49	C1	14	Target 1	-0.00375585	0.00531585
49	C1	15	Target 1	-0.000307528	0.003793
49	C1	16	Target 1	0.0053636	0.00449296
49	C1	17	Target 1	0.0112599	0.00541809
49	C1	18	Target 1	0.0130754	0.00226239
49	C1	19	Target 1	0.0229524	0.00716828
49	C1	20	Target 1	0.0347727	0.0140173
49	C1	21	Target 1	0.0577697	0.0320432
49	C1	22	Target 1	0.0895696	0.0588719
49	C1	23	Target 1	0.150438	0.114769
49	C1	24	Target 1	0.235935	0.195295
49	C1	25	Target 1	0.391436	0.345825
49	C1	26	Target 1	0.678005	0.627423
49	C1	27	Target 1	1.07212	1.01656
49	C1	28	Target 1	1.54926	1.48874
49	C1	29	Target 1	1.99875	1.93325
49	C1	30	Target 1	2.32999	2.25952
49	C1	31	Target 1	2.51483	2.43939
49	C1	32	Target 1	2.62176	2.54135
49	C1	33	Target 1	2.66552	2.58014
[truncated: 13,407 more rows]

## Sheet: Results
Block Type	384-Well Block
Calibration Background is expired	No
Calibration Background performed on	11-14-2023
Calibration Pure Dye ABY is expired	No
Calibration Pure Dye ABY performed on	11-14-2023
Calibration Pure Dye CY5 is expired	No
Calibration Pure Dye CY5 performed on	11-14-2023
Calibration Pure Dye FAM is expired	No
Calibration Pure Dye FAM performed on	11-14-2023
Calibration Pure Dye JUN is expired	No
Calibration Pure Dye JUN performed on	11-14-2023
Calibration Pure Dye MUSTANG PURPLE is expired	No
Calibration Pure Dye MUSTANG PURPLE performed on	11-14-2023
Calibration Pure Dye NED is expired	No
Calibration Pure Dye NED performed on	11-14-2023
Calibration Pure Dye ROX is expired	No
Calibration Pure Dye ROX performed on	11-14-2023
Calibration Pure Dye SYBR is expired	No
Calibration Pure Dye SYBR performed on	11-14-2023
Calibration Pure Dye TAMRA is expired	No
Calibration Pure Dye TAMRA performed on	11-14-2023
Calibration Pure Dye VIC is expired	No
Calibration Pure Dye VIC performed on	11-14-2023
Calibration ROI is expired	No
Calibration ROI performed on	11-14-2023
Calibration Uniformity is expired	No
Calibration Uniformity performed on	11-14-2023
Chemistry	SYBR_GREEN
Date Created	2023-11-14 18:09:54 PM CST
Experiment Barcode
Experiment Comment
Experiment File Name	E:\2023-1114_103838.eds
Experiment Name	2023-06-15_103838
Experiment Run End Time	2023-11-14 17:54:31 PM CST
Experiment Type	Standard Curve
Instrument Name	272530883
Instrument Serial Number	272530883
Instrument Type	QuantStudio™ 5 System
Passive Reference	ROX
Post-read Stage/Step
Pre-read Stage/Step
Quantification Cycle Method	Ct
Signal Smoothing On	true
Stage where Melt Analysis is performed	Stage3
Stage/ Cycle where Ct Analysis is performed	Stage2, Step2
User Name
Well	Well Position	Omit	Sample Name	Target Name	Task	Reporter	Quencher	CT	Ct Mean	Ct SD	Quantity	Quantity Mean	Quantity SD	Y-Intercept	R(superscript 2)	Slope	Efficiency	Automatic Ct Threshold	Ct Threshold	Automatic Baseline	Baseline Start	Baseline End	Amp Status	Comments	Cq Conf	CQCONF	EXPFAIL	HIGHSD	PRFDROP	DRNMIN	CTFAIL	PRFLOW	NOISE	Tm1	SPIKE	Tm2	BADROX	Tm3	Tm4
1	A1	FALSE	Sample 1	Target 1	UNKNOWN	SYBR	None	31.9121	22.1098	9.09855								TRUE	0.196691	TRUE	3	26	Amp		0.989045	N	N	Y	N	N	N	N	N	77.4101	N		N
2	A2	FALSE	Sample 1	Target 1	UNKNOWN	SYBR	None	31.6963	22.1098	9.09855								TRUE	0.196691	TRUE	3	26	Amp		0.989197	N	N	Y	N	N	N	N	N	77.4101	N		N
3	A3	FALSE	Sample 1	Target 1	UNKNOWN	SYBR	None	31.4888	22.1098	9.09855								TRUE	0.196691	TRUE	3	26	Amp		0.988802	N	N	Y	N	N	N	N	N	77.4101	N		N
4	A4	FALSE	Sample 1	Target 1	UNKNOWN	SYBR	None	29.3846	22.1098	9.09855								TRUE	0.196691	TRUE	3	23	Amp		0.986339	N	N	Y	N	N	N	N	N	77.4101	N		N
5	A5	FALSE	Sample 1	Target 1	UNKNOWN	SYBR	None	29.4415	22.1098	9.09855								TRUE	0.196691	TRUE	3	24	Amp		0.9607	N	N	Y	N	N	N	N	N	77.5364	N		N
6	A6	FALSE	Sample 1	Target 1	UNKNOWN	SYBR	None	29.3402	22.1098	9.09855								TRUE	0.196691	TRUE	3	24	Amp		0.968293	N	N	Y	N	N	N	N	N	77.5364	N		N
7	A7	FALSE	Sample 1	Target 1	UNKNOWN	SYBR	None	30.3511	22.1098	9.09855								TRUE	0.196691	TRUE	3	26	Amp		0.989892	N	N	Y	N	N	N	N	N	77.5364	N		N
8	A8	FALSE	Sample 1	Target 1	UNKNOWN	SYBR	None	30.2524	22.1098	9.09855								TRUE	0.196691	TRUE	3	23	Amp		0.991656	N	N	Y	N	N	N	N	N	77.5364	N		N
9	A9	FALSE	Sample 1	Target 1	UNKNOWN	SYBR	None	30.676	22.1098	9.09855								TRUE	0.196691	TRUE	3	26	Amp		0.988897	N	N	Y	N	N	N	N	N	77.5079	N		N
10	A10	FALSE	Sample 1	Target 1	UNKNOWN	SYBR	None	28.845	22.1098	9.09855								TRUE	0.196691	TRUE	3	23	Amp		0.990023	N	N	Y	N	N	N	N	N	77.5079	N		N
11	A11	FALSE	Sample 1	Target 1	UNKNOWN	SYBR	None	28.9116	22.1098	9.09855								TRUE	0.196691	TRUE	3	23	Amp		0.972155	N	N	Y	N	N	N	N	N	77.3896	N		N
12	A12	FALSE	Sample 1	Target 1	UNKNOWN	SYBR	None	28.9923	22.1098	9.09855								TRUE	0.196691	TRUE	3	23	Amp		0.990247	N	N	Y	N	N	N	N	N	77.3896	N		N
13	A13	FALSE	Sample 1	Target 1	UNKNOWN	SYBR	None	32.5865	22.1098	9.09855								TRUE	0.196691	TRUE	3	27	Amp		0.986498	N	N	Y	N	N	N	N	N	77.3998	N		N
14	A14	FALSE	Sample 1	Target 1	UNKNOWN	SYBR	None	32.6048	22.1098	9.09855								TRUE	0.196691	TRUE	3	27	Amp		0.990511	N	N	Y	N	N	N	N	N	77.3998	N		N
15	A15	FALSE	Sample 1	Target 1	UNKNOWN	SYBR	None	32.33	22.1098	9.09855								TRUE	0.196691	TRUE	3	27	Amp		0.972679	N	N	Y	N	N	N	N	N	77.2815	N		N
16	A16	FALSE	Sample 1	Target 1	UNKNOWN	SYBR	None	26.5708	22.1098	9.09855								TRUE	0.196691	TRUE	3	20	Amp		0.990964	N	N	Y	N	N	N	N	N	77.3998	N		N
17	A17	FALSE	Sample 1	Target 1	UNKNOWN	SYBR	None	26.8096	22.1098	9.09855								TRUE	0.196691	TRUE	3	21	Amp		0.988339	N	N	Y	N	N	N	N	N	77.5284	N		N
18	A18	FALSE	Sample 1	Target 1	UNKNOWN	SYBR	None	26.6416	22.1098	9.09855								TRUE	0.196691	TRUE	3	20	Amp		0.988375	N	N	Y	N	N	N	N	N	77.5284	N		N
19	A19	FALSE	Sample 1	Target 1	UNKNOWN	SYBR	None	Undetermined	22.1098	9.09855								TRUE	0.196691	TRUE	3	39	No Amp		0	Y	Y	N	N	N	N	N	N	73.2649	Y		N
20	A20	FALSE	Sample 1	Target 1	UNKNOWN	SYBR	None	Undetermined	22.1098	9.09855								TRUE	0.196691	TRUE	3	39	No Amp		0	Y	Y	N	N	N	N	Y	N	66.2774	Y		Y
21	A21	FALSE	Sample 1	Target 1	UNKNOWN	SYBR	None	Undetermined	22.1098	9.09855								TRUE	0.196691	TRUE	3	39	No Amp		0	Y	Y	N	N	N	N	Y	N	86.2766	Y		Y
22	A22	FALSE	Sample 1	Target 1	UNKNOWN	SYBR	None	Undetermined	22.1098	9.09855								TRUE	0.196691	TRUE	3	39	No Amp		0	Y	Y	N	N	N	N	N	N	62.6044	Y		N
23	A23	FALSE	Sample 1	Target 1	UNKNOWN	SYBR	None	16.8233	22.1098	9.09855								TRUE	0.196691	TRUE	3	4	No Amp		0	Y	N	Y	N	Y	N	Y	N	79.175	Y		Y
24	A24	FALSE	Sample 1	Target 1	UNKNOWN	SYBR	None	24.0888	22.1098	9.09855								TRUE	0.196691	TRUE	3	18	No Amp		0.227308	Y	N	Y	N	Y	N	Y	N	60.5923	Y		Y
25	B1	FALSE	Sample 1	Target 1	UNKNOWN	SYBR	None	Undetermined	22.1098	9.09855								TRUE	0.196691	TRUE	3	39	No Amp		0	Y	Y	N	N	N	N	N	N	79.8972	Y		N
26	B2	FALSE	Sample 1	Target 1	UNKNOWN	SYBR	None	32.7683	22.1098	9.09855								TRUE	0.196691	TRUE	3	26	No Amp		0	Y	N	Y	Y	N	N	Y	N	61.7771	Y		N
27	B3	FALSE	Sample 1	Target 1	UNKNOWN	SYBR	None	Undetermined	22.1098	9.09855								TRUE	0.196691	TRUE	3	39	No Amp		0	Y	Y	N	N	N	N	N	N	74.4493	Y		N
28	B4	FALSE	Sample 1	Target 1	UNKNOWN	SYBR	None	1.31093	22.1098	9.09855								TRUE	0.196691	TRUE	3	35	No Amp		0	Y	N	Y	Y	N	N	N	N	67.4618	Y		N
29	B5	FALSE	Sample 1	Target 1	UNKNOWN	SYBR	None	37.8668	22.1098	9.09855								TRUE	0.196691	TRUE	3	35	No Amp		0	Y	N	Y	Y	Y	N	N	N	94.9538	Y		N
30	B6	FALSE	Sample 1	Target 1	UNKNOWN	SYBR	None	8.35116	22.1098	9.09855								TRUE	0.196691	TRUE	3	15	No Amp		0.390511	Y	N	Y	Y	Y	N	N	N	71.2567	Y		N
31	B7	FALSE	Sample 1	Target 1	UNKNOWN	SYBR	None	Undetermined	22.1098	9.09855								TRUE	0.196691	TRUE	3	11	No Amp		0	Y	N	N	N	N	N	N	N	80.2616	Y		N
32	B8	FALSE	Sample 1	Target 1	UNKNOWN	SYBR	None	Undetermined	22.1098	9.09855								TRUE	0.196691	TRUE	3	39	No Amp		0	Y	Y	N	N	N	N	N	N	71.4937	Y		N
33	B9	FALSE	Sample 1	Target 1	UNKNOWN	SYBR	None	29.4808	22.1098	9.09855								TRUE	0.196691	TRUE	3	27	No Amp		0	Y	N	Y	Y	Y	N	N	N	88.6274	Y		N
34	B10	FALSE	Sample 1	Target 1	UNKNOWN	SYBR	None	6.84767	22.1098	9.09855								TRUE	0.196691	TRUE	3	4	No Amp		0.276249	Y	N	Y	N	N	N	Y	N	71.3567	Y		Y
35	B11	FALSE	Sample 1	Target 1	UNKNOWN	SYBR	None	Undetermined	22.1098	9.09855								TRUE	0.196691	TRUE	3	35	No Amp		0	Y	N	N	N	N	N	N	N	91.9396	Y		N
36	B12	FALSE	Sample 1	Target 1	UNKNOWN	SYBR	None	31.2273	22.1098	9.09855								TRUE	0.196691	TRUE	3	29	No Amp		0	Y	N	Y	Y	Y	N	N	N	65.4421	Y		N
37	B13	FALSE	Sample 1	Target 1	UNKNOWN	SYBR	None	27.2486	22.1098	9.09855								TRUE	0.196691	TRUE	3	27	No Amp		0.749298	Y	N	Y	Y	N	N	Y	N	60.0004	Y		Y
38	B14	FALSE	Sample 1	Target 1	UNKNOWN	SYBR	None	Undetermined	22.1098	9.09855								TRUE	0.196691	TRUE	3	39	No Amp		0	Y	Y	N	N	N	N	N	N	85.4485	Y		N
39	B15	FALSE	Sample 1	Target 1	UNKNOWN	SYBR	None	19.1099	22.1098	9.09855								TRUE	0.196691	TRUE	3	17	No Amp		0	Y	N	Y	Y	Y	N	Y	N	91.13	Y		Y
40	B16	FALSE	Sample 1	Target 1	UNKNOWN	SYBR	None	Undetermined	22.1098	9.09855								TRUE	0.196691	TRUE	3	29	No Amp		0	Y	N	N	N	N	N	N	N	91.4851	N		N
41	B17	FALSE	Sample 1	Target 1	UNKNOWN	SYBR	None	15.5254	22.1098	9.09855								TRUE	0.196691	TRUE	3	11	No Amp		0.110148	Y	N	Y	Y	N	N	Y	N	83.2131	Y		Y
42	B18	FALSE	Sample 1	Target 1	UNKNOWN	SYBR	None	28.5643	22.1098	9.09855								TRUE	0.196691	TRUE	3	26	No Amp		0	Y	N	Y	Y	Y	N	N	N	71.2515	Y		N
43	B19	FALSE	Sample 1	Target 1	UNKNOWN	SYBR	None	Undetermined	22.1098	9.09855								TRUE	0.196691	TRUE	3	17	No Amp		0	Y	N	N	N	N	N	N	N	85.2265	Y		N
44	B20	FALSE	Sample 1	Target 1	UNKNOWN	SYBR	None	Undetermined	22.1098	9.09855								TRUE	0.196691	TRUE	3	34	No Amp		0	Y	N	N	N	N	N	N	N	60.0005	Y		N
45	B21	FALSE	Sample 1	Target 1	UNKNOWN	SYBR	None	11.4948	22.1098	9.09855								TRUE	0.196691	TRUE	3	5	No Amp		0	Y	N	Y	Y	Y	N	Y	N	91.7213	Y		Y
46	B22	FALSE	Sample 1	Target 1	UNKNOWN	SYBR	None	28.4534	22.1098	9.09855								TRUE	0.196691	TRUE	3	26	No Amp		0.18832	Y	N	Y	Y	N	N	N	N	67.5756	Y		N
47	B23	FALSE	Sample 1	Target 1	UNKNOWN	SYBR	None	Undetermined	22.1098	9.09855								TRUE	0.196691	TRUE	3	26	No Amp		0	Y	N	N	N	N	N	Y	N	88.4071	Y		Y
48	B24	FALSE	Sample 1	Target 1	UNKNOWN	SYBR	None	Undetermined	22.1098	9.09855								TRUE	0.196691	TRUE	3	39	No Amp		0	Y	Y	N	N	N	N	Y	N	60.0005	Y		Y
49	C1	FALSE	Sample 1	Target 1	UNKNOWN	SYBR	None	24.0153	22.1098	9.09855								TRUE	0.196691	TRUE	3	18	Amp		0.97707	N	N	Y	N	N	N	N	N	84.2791	N		N
50	C2	FALSE	Sample 1	Target 1	UNKNOWN	SYBR	None	23.9713	22.1098	9.09855								TRUE	0.196691	TRUE	3	20	Amp		0.987934	N	N	Y	N	N	N	N	N	84.2791	N		N
51	C3	FALSE	Sample 1	Target 1	UNKNOWN	SYBR	None	23.4973	22.1098	9.09855								TRUE	0.196691	TRUE	3	15	Amp		0.983502	N	N	Y	N	N	N	N	N	84.2791	N		N
52	C4	FALSE	Sample 1	Target 1	UNKNOWN	SYBR	None	21.7601	22.1098	9.09855								TRUE	0.196691	TRUE	3	16	Amp		0.986336	N	N	Y	N	N	N	N	N	84.2791	N		N
53	C5	FALSE	Sample 1	Target 1	UNKNOWN	SYBR	None	21.8294	22.1098	9.09855								TRUE	0.196691	TRUE	3	17	Amp		0.95798	N	N	Y	N	N	N	N	N	84.2901	N		N
54	C6	FALSE	Sample 1	Target 1	UNKNOWN	SYBR	None	21.8031	22.1098	9.09855								TRUE	0.196691	TRUE	3	17	Amp		0.989224	N	N	Y	N	N	N	N	N	84.2901	N		N
55	C7	FALSE	Sample 1	Target 1	UNKNOWN	SYBR	None	20.5434	22.1098	9.09855								TRUE	0.196691	TRUE	3	15	Amp		0.990054	N	N	Y	N	N	N	N	N	84.4086	N		N
56	C8	FALSE	Sample 1	Target 1	UNKNOWN	SYBR	None	20.4413	22.1098	9.09855								TRUE	0.196691	TRUE	3	14	Amp		0.981325	N	N	Y	N	N	N	N	N	84.4086	N		N
57	C9	FALSE	Sample 1	Target 1	UNKNOWN	SYBR	None	20.4669	22.1098	9.09855								TRUE	0.196691	TRUE	3	16	Amp		0.988811	N	N	Y	N	N	N	N	N	84.2506	N		N
58	C10	FALSE	Sample 1	Target 1	UNKNOWN	SYBR	None	20.6944	22.1098	9.09855								TRUE	0.196691	TRUE	3	15	Amp		0.990483	N	N	Y	N	N	N	N	N	84.3689	N		N
59	C11	FALSE	Sample 1	Target 1	UNKNOWN	SYBR	None	20.7125	22.1098	9.09855								TRUE	0.196691	TRUE	3	16	Amp		0.992946	N	N	Y	N	N	N	N	N	84.3689	N		N
60	C12	FALSE	Sample 1	Target 1	UNKNOWN	SYBR	None	20.8333	22.1098	9.09855								TRUE	0.196691	TRUE	3	16	Amp		0.990946	N	N	Y	N	N	N	N	N	84.3689	N		N
61	C13	FALSE	Sample 1	Target 1	UNKNOWN	SYBR	None	23.9623	22.1098	9.09855								TRUE	0.196691	TRUE	3	19	Amp		0.99078	N	N	Y	N	N	N	N	N	84.3833	N		N
62	C14	FALSE	Sample 1	Target 1	UNKNOWN	SYBR	None	24.001	22.1098	9.09855								TRUE	0.196691	TRUE	3	19	Amp		0.986904	N	N	Y	N	N	N	N	N	84.3833	N		N
63	C15	FALSE	Sample 1	Target 1	UNKNOWN	SYBR	None	23.9167	22.1098	9.09855								TRUE	0.196691	TRUE	3	19	Amp		0.984737	N	N	Y	N	N	N	N	N	84.3833	N		N
64	C16	FALSE	Sample 1	Target 1	UNKNOWN	SYBR	None	18.9419	22.1098	9.09855								TRUE	0.196691	TRUE	3	14	Amp		0.985477	N	N	Y	N	N	N	N	N	84.3833	N		N
65	C17	FALSE	Sample 1	Target 1	UNKNOWN	SYBR	None	18.812	22.1098	9.09855								TRUE	0.196691	TRUE	3	13	Amp		0.990777	N	N	Y	N	N	N	N	N	84.5159	N		N
66	C18	FALSE	Sample 1	Target 1	UNKNOWN	SYBR	None	18.7056	22.1098	9.09855								TRUE	0.196691	TRUE	3	12	Amp		0.9847	N	N	Y	N	N	N	N	N	84.3975	N		N
67	C19	FALSE	Sample 1	Target 1	UNKNOWN	SYBR	None	8.21415	22.1098	9.09855								TRUE	0.196691	TRUE	3	7	No Amp		0.620516	Y	N	Y	Y	N	N	N	N	94.4642	Y		N
68	C20	FALSE	Sample 1	Target 1	UNKNOWN	SYBR	None	Undetermined	22.1098	9.09855								TRUE	0.196691	TRUE	3	39	No Amp		0	Y	Y	N	N	N	N	N	N	60.0005	Y		N
69	C21	FALSE	Sample 1	Target 1	UNKNOWN	SYBR	None	Undetermined	22.1098	9.09855								TRUE	0.196691	TRUE	3	39	No Amp		0	Y	Y	N	N	N	N	N	N	60.0005	Y		Y
70	C22	FALSE	Sample 1	Target 1	UNKNOWN	SYBR	None	11.2281	22.1098	9.09855								TRUE	0.196691	TRUE	3	10	No Amp		0.388951	Y	N	Y	Y	N	N	N	N	94.917	Y		Y
71	C23	FALSE	Sample 1	Target 1	UNKNOWN	SYBR	None	Undetermined	22.1098	9.09855								TRUE	0.196691	TRUE	3	39	No Amp		0	Y	Y	N	N	N	N	Y	N	60.1189	Y		Y
72	C24	FALSE	Sample 1	Target 1	UNKNOWN	SYBR	None	Undetermined	22.1098	9.09855								TRUE	0.196691	TRUE	3	39	No Amp		0	Y	Y	N	N	N	N	N	N	76.0976	Y		N
73	D1	FALSE	Sample 1	Target 1	UNKNOWN	SYBR	None	10.5872	22.1098	9.09855								TRUE	0.196691	TRUE	3	8	No Amp		0	Y	N	Y	Y	Y	N	N	N	85.2266	Y		N
74	D2	FALSE	Sample 1	Target 1	UNKNOWN	SYBR	None	Undetermined	22.1098	9.09855								TRUE	0.196691	TRUE	3	39	No Amp		0	Y	Y	N	N	N	N	N	N	78.3575	Y		N
75	D3	FALSE	Sample 1	Target 1	UNKNOWN	SYBR	None	32.4309	22.1098	9.09855								TRUE	0.196691	TRUE	3	29	No Amp		0	Y	N	Y	Y	Y	N	N	N	64.9747	Y		N
76	D4	FALSE	Sample 1	Target 1	UNKNOWN	SYBR	None	15.0452	22.1098	9.09855								TRUE	0.196691	TRUE	3	14	No Amp		0	Y	N	Y	Y	N	N	N	N	62.1324	Y		N
77	D5	FALSE	Sample 1	Target 1	UNKNOWN	SYBR	None	25.1292	22.1098	9.09855								TRUE	0.196691	TRUE	3	23	No Amp		0	Y	N	Y	Y	Y	N	N	N	60.2376	Y		N
78	D6	FALSE	Sample 1	Target 1	UNKNOWN	SYBR	None	Undetermined	22.1098	9.09855								TRUE	0.196691	TRUE	3	14	No Amp		0	Y	N	N	N	N	N	N	N	67.2282	Y		N
79	D7	FALSE	Sample 1	Target 1	UNKNOWN	SYBR	None	Undetermined	22.1098	9.09855								TRUE	0.196691	TRUE	3	39	No Amp		0	Y	Y	N	N	N	N	N	N	63.7921	N		N
80	D8	FALSE	Sample 1	Target 1	UNKNOWN	SYBR	None	22.6534	22.1098	9.09855								TRUE	0.196691	TRUE	3	20	No Amp		0.0354881	Y	N	Y	Y	N	N	N	N	69.7164	Y		Y
81	D9	FALSE	Sample 1	Target 1	UNKNOWN	SYBR	None	7.20272	22.1098	9.09855								TRUE	0.196691	TRUE	3	4	No Amp		0	Y	N	Y	Y	Y	N	N	N	63.6677	Y		Y
82	D10	FALSE	Sample 1	Target 1	UNKNOWN	SYBR	None	7.83291	22.1098	9.09855								TRUE	0.196691	TRUE	3	7	No Amp		0	Y	N	Y	Y	N	N	N	N	60.0006	Y		Y
83	D11	FALSE	Sample 1	Target 1	UNKNOWN	SYBR	None	Undetermined	22.1098	9.09855								TRUE	0.196691	TRUE	3	39	No Amp		0	Y	Y	N	N	N	N	N	N	60.0006	Y		Y
84	D12	FALSE	Sample 1	Target 1	UNKNOWN	SYBR	None	Undetermined	22.1098	9.09855								TRUE	0.196691	TRUE	3	39	No Amp		0	Y	Y	N	N	N	N	N	N	60.0006	Y		Y
85	D13	FALSE	Sample 1	Target 1	UNKNOWN	SYBR	None	32.86	22.1098	9.09855								TRUE	0.196691	TRUE	3	30	No Amp		0	Y	N	Y	Y	Y	N	N	N	94.9176	N		N
86	D14	FALSE	Sample 1	Target 1	UNKNOWN	SYBR	None	Undetermined	22.1098	9.09855								TRUE	0.196691	TRUE	3	39	No Amp		0	Y	Y	N	N	N	Y	N	N	76.0978	N		N
87	D15	FALSE	Sample 1	Target 1	UNKNOWN	SYBR	None	32.0027	22.1098	9.09855								TRUE	0.196691	TRUE	3	29	No Amp		0	Y	N	Y	N	N	N	N	N	63.3146	Y		Y
88	D16	FALSE	Sample 1	Target 1	UNKNOWN	SYBR	None	Undetermined	22.1098	9.09855								TRUE	0.196691	TRUE	3	19	No Amp		0	Y	N	N	N	N	N	N	N	81.6609	Y		Y
89	D17	FALSE	Sample 1	Target 1	UNKNOWN	SYBR	None	30.9297	22.1098	9.09855								TRUE	0.196691	TRUE	3	21	No Amp		0	Y	N	Y	Y	N	N	N	N	81.0814	Y		Y
90	D18	FALSE	Sample 1	Target 1	UNKNOWN	SYBR	None	Undetermined	22.1098	9.09855								TRUE	0.196691	TRUE	3	39	No Amp		0	Y	Y	N	N	N	N	N	N	94.9379	Y		Y
91	D19	FALSE	Sample 1	Target 1	UNKNOWN	SYBR	None	22.9757	22.1098	9.09855								TRUE	0.196691	TRUE	3	20	No Amp		0.475614	Y	N	Y	Y	N	N	Y	N	77.7653	Y		Y
92	D20	FALSE	Sample 1	Target 1	UNKNOWN	SYBR	None	Undetermined	22.1098	9.09855								TRUE	0.196691	TRUE	3	39	No Amp		0	Y	Y	N	N	N	N	Y	N	82.8578	Y		Y
93	D21	FALSE	Sample 1	Target 1	UNKNOWN	SYBR	None	Undetermined	22.1098	9.09855								TRUE	0.196691	TRUE	3	39	No Amp		0	Y	Y	N	N	N	N	Y	N	76.6894	Y		Y
94	D22	FALSE	Sample 1	Target 1	UNKNOWN	SYBR	None	26.8783	22.1098	9.09855								TRUE	0.196691	TRUE	3	26	No Amp		0	Y	N	Y	N	N	N	Y	N	70.1796	Y		Y
95	D23	FALSE	Sample 1	Target 1	UNKNOWN	SYBR	None	Undetermined	22.1098	9.09855								TRUE	0.196691	TRUE	3	39	No Amp		0	Y	Y	N	N	N	N	Y	N	72.7835	Y		N
96	D24	FALSE	Sample 1	Target 1	UNKNOWN	SYBR	None	Undetermined	22.1098	9.09855								TRUE	0.196691	TRUE	3	39	No Amp		0	Y	Y	N	N	N	N	Y	N	64.2615	Y		Y
97	E1	FALSE	Sample 1	Target 1	UNKNOWN	SYBR	None	32.2741	22.1098	9.09855								TRUE	0.196691	TRUE	3	24	No Amp		0	Y	N	Y	Y	N	N	N	N	62.6061	Y		N
98	E2	FALSE	Sample 1	Target 1	UNKNOWN	SYBR	None	Undetermined	22.1098	9.09855								TRUE	0.196691	TRUE	3	8	No Amp		0	Y	N	N	N	N	N	N	N	69.3567	Y		Y
99	E3	FALSE	Sample 1	Target 1	UNKNOWN	SYBR	None	7.32535	22.1098	9.09855								TRUE	0.196691	TRUE	3	7	No Amp		0.45786	Y	N	Y	Y	N	N	Y	N	73.9756	Y		N
100	E4	FALSE	Sample 1	Target 1	UNKNOWN	SYBR	None	16.286	22.1098	9.09855								TRUE	0.196691	TRUE	3	11	No Amp		0	Y	N	Y	N	Y	N	N	N	91.385	N		N
101	E5	FALSE	Sample 1	Target 1	UNKNOWN	SYBR	None	Undetermined	22.1098	9.09855								TRUE	0.196691	TRUE	3	39	No Amp		0	Y	Y	N	N	N	N	Y	N	71.0197	Y		Y
102	E6	FALSE	Sample 1	Target 1	UNKNOWN	SYBR	None	Undetermined	22.1098	9.09855								TRUE	0.196691	TRUE	3	39	No Amp		0	Y	Y	N	N	N	N	Y	N	94.9538	Y		N
103	E7	FALSE	Sample 1	Target 1	UNKNOWN	SYBR	None	Undetermined	22.1098	9.09855								TRUE	0.196691	TRUE	3	39	No Amp		0	Y	Y	N	N	N	N	N	N	87.2522	Y		Y
104	E8	FALSE	Sample 1	Target 1	UNKNOWN	SYBR	None	22.5499	22.1098	9.09855								TRUE	0.196691	TRUE	3	21	No Amp		0.0578703	Y	N	Y	N	N	N	N	N	85.5934	Y		N
105	E9	FALSE	Sample 1	Target 1	UNKNOWN	SYBR	None	Undetermined	22.1098	9.09855								TRUE	0.196691	TRUE	3	9	No Amp		0	Y	N	N	N	N	N	N	N	69.3457	Y		Y
106	E10	FALSE	Sample 1	Target 1	UNKNOWN	SYBR	None	36.4308	22.1098	9.09855								TRUE	0.196691	TRUE	3	35	No Amp		0	Y	N	Y	Y	Y	N	N	N	74.1957	N		N
107	E11	FALSE	Sample 1	Target 1	UNKNOWN	SYBR	None	Undetermined	22.1098	9.09855								TRUE	0.196691	TRUE	3	28	No Amp		0	Y	N	N	N	N	Y	N	N	84.7237	Y		Y
108	E12	FALSE	Sample 1	Target 1	UNKNOWN	SYBR	None	27.602	22.1098	9.09855								TRUE	0.196691	TRUE	3	25	No Amp		0.473489	Y	N	Y	Y	N	N	N	N	94.0688	Y		N
109	E13	FALSE	Sample 1	Target 1	UNKNOWN	SYBR	None	18.6194	22.1098	9.09855								TRUE	0.196691	TRUE	3	16	No Amp		0	Y	N	Y	Y	N	N	N	N	70.0613	Y		Y
110	E14	FALSE	Sample 1	Target 1	UNKNOWN	SYBR	None	Undetermined	22.1098	9.09855								TRUE	0.196691	TRUE	3	39	No Amp		0	Y	Y	N	N	N	N	N	N	94.5625	Y		N
111	E15	FALSE	Sample 1	Target 1	UNKNOWN	SYBR	None	Undetermined	22.1098	9.09855								TRUE	0.196691	TRUE	3	39	No Amp		0	Y	Y	N	N	N	N	N	N	81.4242	Y		N
112	E16	FALSE	Sample 1	Target 1	UNKNOWN	SYBR	None	34.4627	22.1098	9.09855								TRUE	0.196691	TRUE	3	30	No Amp		0	Y	N	Y	Y	N	N	N	N	94.3258	N		N
113	E17	FALSE	Sample 1	Target 1	UNKNOWN	SYBR	None	Undetermined	22.1098	9.09855								TRUE	0.196691	TRUE	3	26	No Amp		0	Y	N	N	N	N	N	N	N	65.4484	Y		Y
114	E18	FALSE	Sample 1	Target 1	UNKNOWN	SYBR	None	Undetermined	22.1098	9.09855								TRUE	0.196691	TRUE	3	35	No Amp		0	Y	N	N	N	N	Y	Y	N	70.7778	Y		N
115	E19	FALSE	Sample 1	Target 1	UNKNOWN	SYBR	None	Undetermined	22.1098	9.09855								TRUE	0.196691	TRUE	3	39	No Amp		0	Y	Y	N	N	N	N	Y	N	91.2665	Y		N
116	E20	FALSE	Sample 1	Target 1	UNKNOWN	SYBR	None	Undetermined	22.1098	9.09855								TRUE	0.196691	TRUE	3	11	No Amp		0	Y	N	N	N	N	N	Y	N	89.7269	Y		Y
117	E21	FALSE	Sample 1	Target 1	UNKNOWN	SYBR	None	Undetermined	22.1098	9.09855								TRUE	0.196691	TRUE	3	39	No Amp		0	Y	Y	N	N	N	N	N	N	94.917	Y		N
118	E22	FALSE	Sample 1	Target 1	UNKNOWN	SYBR	None	16.4787	22.1098	9.09855								TRUE	0.196691	TRUE	3	14	No Amp		0	Y	N	Y	Y	N	N	Y	N	74.5589	Y		Y
119	E23	FALSE	Sample 1	Target 1	UNKNOWN	SYBR	None	13.9474	22.1098	9.09855								TRUE	0.196691	TRUE	3	15	No Amp		0.303258	Y	N	Y	Y	N	N	Y	N	60.1189	Y		Y
120	E24	FALSE	Sample 1	Target 1	UNKNOWN	SYBR	None	Undetermined	22.1098	9.09855								TRUE	0.196691	TRUE	3	29	No Amp		0	Y	N	N	N	N	Y	N	N	94.917	Y		N
121	F1	FALSE	Sample 1	Target 1	UNKNOWN	SYBR	None	Undetermined	22.1098	9.09855								TRUE	0.196691	TRUE	3	10	No Amp		0	Y	N	N	N	N	Y	N	N	60.0006	Y		N
122	F2	FALSE	Sample 1	Target 1	UNKNOWN	SYBR	None	Undetermined	22.1098	9.09855								TRUE	0.196691	TRUE	3	39	No Amp		0	Y	Y	N	N	N	N	N	N	63.3167	Y		Y
123	F3	FALSE	Sample 1	Target 1	UNKNOWN	SYBR	None	Undetermined	22.1098	9.09855								TRUE	0.196691	TRUE	3	39	No Amp		0	Y	Y	N	N	N	N	N	N	67.3434	Y		N
124	F4	FALSE	Sample 1	Target 1	UNKNOWN	SYBR	None	Undetermined	22.1098	9.09855								TRUE	0.196691	TRUE	3	39	No Amp		0	Y	Y	N	N	N	N	N	N	60.0006	Y		N
125	F5	FALSE	Sample 1	Target 1	UNKNOWN	SYBR	None	9.83507	22.1098	9.09855								TRUE	0.196691	TRUE	3	8	No Amp		0	Y	N	Y	Y	Y	N	N	N	94.9538	Y		N
126	F6	FALSE	Sample 1	Target 1	UNKNOWN	SYBR	None	Undetermined	22.1098	9.09855								TRUE	0.196691	TRUE	3	39	No Amp		0	Y	Y	N	N	N	N	Y	N	94.9538	Y		Y
127	F7	FALSE	Sample 1	Target 1	UNKNOWN	SYBR	None	7.13718	22.1098	9.09855								TRUE	0.196691	TRUE	3	6	No Amp		0	Y	N	Y	Y	N	N	N	N	83.9347	Y		Y
128	F8	FALSE	Sample 1	Target 1	UNKNOWN	SYBR	None	Undetermined	22.1098	9.09855								TRUE	0.196691	TRUE	3	15	No Amp		0	Y	N	N	N	N	N	N	N	83.4607	Y		N
129	F9	FALSE	Sample 1	Target 1	UNKNOWN	SYBR	None	Undetermined	22.1098	9.09855								TRUE	0.196691	TRUE	3	39	No Amp		0	Y	Y	N	N	N	N	N	N	60.0006	Y		N
130	F10	FALSE	Sample 1	Target 1	UNKNOWN	SYBR	None	6.75374	22.1098	9.09855								TRUE	0.196691	TRUE	3	4	No Amp		0.282417	Y	N	Y	Y	N	N	N	N	63.786	Y		Y
131	F11	FALSE	Sample 1	Target 1	UNKNOWN	SYBR	None	Undetermined	22.1098	9.09855								TRUE	0.196691	TRUE	3	12	No Amp		0	Y	N	N	N	N	N	N	N	87.0896	Y		Y
132	F12	FALSE	Sample 1	Target 1	UNKNOWN	SYBR	None	35.6038	22.1098	9.09855								TRUE	0.196691	TRUE	3	22	No Amp		0	Y	N	Y	Y	N	N	N	N	94.8969	N		N
133	F13	FALSE	Sample 1	Target 1	UNKNOWN	SYBR	None	Undetermined	22.1098	9.09855								TRUE	0.196691	TRUE	3	12	No Amp		0	Y	N	N	N	N	N	N	N	75.3876	Y		Y
134	F14	FALSE	Sample 1	Target 1	UNKNOWN	SYBR	None	33.943	22.1098	9.09855								TRUE	0.196691	TRUE	3	32	No Amp		0.14311	Y	N	Y	Y	N	N	N	N	93.2605	Y		N
135	F15	FALSE	Sample 1	Target 1	UNKNOWN	SYBR	None	24.8432	22.1098	9.09855								TRUE	0.196691	TRUE	3	23	No Amp		0.138155	Y	N	Y	Y	N	N	N	N	86.2771	Y		N
136	F16	FALSE	Sample 1	Target 1	UNKNOWN	SYBR	None	18.6858	22.1098	9.09855								TRUE	0.196691	TRUE	3	16	No Amp		0	Y	N	Y	Y	N	N	N	N	69.1144	Y		N
137	F17	FALSE	Sample 1	Target 1	UNKNOWN	SYBR	None	Undetermined	22.1098	9.09855								TRUE	0.196691	TRUE	3	20	No Amp		0	Y	N	N	N	N	Y	N	N	62.1323	N		N
138	F18	FALSE	Sample 1	Target 1	UNKNOWN	SYBR	None	4.25956	22.1098	9.09855								TRUE	0.196691	TRUE	3	3	No Amp		0.810768	N	N	Y	Y	Y	N	N	N	60.1189	Y		N
139	F19	FALSE	Sample 1	Target 1	UNKNOWN	SYBR	None	Undetermined	22.1098	9.09855								TRUE	0.196691	TRUE	3	19	No Amp		0	Y	N	N	N	N	Y	Y	N	81.6735	Y		Y
140	F20	FALSE	Sample 1	Target 1	UNKNOWN	SYBR	None	Undetermined	22.1098	9.09855								TRUE	0.196691	TRUE	3	39	No Amp		0	Y	Y	N	N	N	N	Y	N	69.3566	Y		Y
141	F21	FALSE	Sample 1	Target 1	UNKNOWN	SYBR	None	Undetermined	22.1098	9.09855								TRUE	0.196691	TRUE	3	39	No Amp		0	Y	Y	N	N	N	N	Y	N	67.9307	Y		Y
142	F22	FALSE	Sample 1	Target 1	UNKNOWN	SYBR	None	Undetermined	22.1098	9.09855								TRUE	0.196691	TRUE	3	39	No Amp		0	Y	Y	N	N	N	N	Y	N	62.4861	Y		Y
143	F23	FALSE	Sample 1	Target 1	UNKNOWN	SYBR	None	22.9467	22.1098	9.09855								TRUE	0.196691	TRUE	3	18	No Amp		0	Y	N	Y	Y	Y	N	Y	N	63.6697	Y		Y
144	F24	FALSE	Sample 1	Target 1	UNKNOWN	SYBR	None	8.93991	22.1098	9.09855								TRUE	0.196691	TRUE	3	5	No Amp		0	Y	N	Y	Y	Y	N	Y	N	83.6727	Y		Y
145	G1	FALSE	Sample 1	Target 1	UNKNOWN	SYBR	None	17.6042	22.1098	9.09855								TRUE	0.196691	TRUE	3	15	No Amp		0	Y	N	Y	Y	Y	N	N	N	92.6878	Y		N
146	G2	FALSE	Sample 1	Target 1	UNKNOWN	SYBR	None	Undetermined	22.1098	9.09855								TRUE	0.196691	TRUE	3	39	No Amp		0	Y	Y	N	N	N	N	N	N	94.938	Y		N
147	G3	FALSE	Sample 1	Target 1	UNKNOWN	SYBR	None	Undetermined	22.1098	9.09855								TRUE	0.196691	TRUE	3	39	No Amp		0	Y	Y	N	N	N	N	N	N	67.2249	Y		N
148	G4	FALSE	Sample 1	Target 1	UNKNOWN	SYBR	None	Undetermined	22.1098	9.09855								TRUE	0.196691	TRUE	3	11	No Amp		0	Y	N	N	N	N	N	N	N	94.938	Y		N
149	G5	FALSE	Sample 1	Target 1	UNKNOWN	SYBR	None	12.5759	22.1098	9.09855								TRUE	0.196691	TRUE	3	8	No Amp		0	Y	N	Y	Y	N	N	N	N	81.5649	Y		Y
150	G6	FALSE	Sample 1	Target 1	UNKNOWN	SYBR	None	24.9461	22.1098	9.09855								TRUE	0.196691	TRUE	3	22	No Amp		0	Y	N	Y	Y	N	N	N	N	81.8019	Y		Y
151	G7	FALSE	Sample 1	Target 1	UNKNOWN	SYBR	None	Undetermined	22.1098	9.09855								TRUE	0.196691	TRUE	3	39	No Amp		0	Y	Y	N	N	N	N	N	N	71.2567	Y		Y
152	G8	FALSE	Sample 1	Target 1	UNKNOWN	SYBR	None	Undetermined	22.1098	9.09855								TRUE	0.196691	TRUE	3	39	No Amp		0	Y	Y	N	N	N	N	N	N	90.9253	N		N
153	G9	FALSE	Sample 1	Target 1	UNKNOWN	SYBR	None	Undetermined	22.1098	9.09855								TRUE	0.196691	TRUE	3	39	No Amp		0	Y	Y	N	N	N	N	N	N	90.875	Y		N
154	G10	FALSE	Sample 1	Target 1	UNKNOWN	SYBR	None	Undetermined	22.1098	9.09855								TRUE	0.196691	TRUE	3	39	No Amp		0	Y	Y	N	N	N	N	Y	N	71.3567	Y		Y
155	G11	FALSE	Sample 1	Target 1	UNKNOWN	SYBR	None	21.55	22.1098	9.09855								TRUE	0.196691	TRUE	3	19	No Amp		0	Y	N	Y	Y	N	N	N	N	84.842	Y		Y
156	G12	FALSE	Sample 1	Target 1	UNKNOWN	SYBR	None	37.7845	22.1098	9.09855								TRUE	0.196691	TRUE	3	35	No Amp		0	Y	N	Y	Y	Y	N	N	N	60.0006	Y		Y
157	G13	FALSE	Sample 1	Target 1	UNKNOWN	SYBR	None	33.2123	22.1098	9.09855								TRUE	0.196691	TRUE	3	30	No Amp		0.398702	Y	N	Y	N	N	N	N	N	82.1344	N		N
158	G14	FALSE	Sample 1	Target 1	UNKNOWN	SYBR	None	20.07	22.1098	9.09855								TRUE	0.196691	TRUE	3	19	No Amp		0.479153	Y	N	Y	Y	N	N	N	N	62.7228	Y		Y
159	G15	FALSE	Sample 1	Target 1	UNKNOWN	SYBR	None	Undetermined	22.1098	9.09855								TRUE	0.196691	TRUE	3	39	No Amp		0	Y	Y	N	N	N	N	Y	N	92.0769	Y		Y
160	G16	FALSE	Sample 1	Target 1	UNKNOWN	SYBR	None	21.1187	22.1098	9.09855								TRUE	0.196691	TRUE	3	19	No Amp		0.479918	Y	N	Y	Y	N	N	N	N	62.7228	Y		Y
161	G17	FALSE	Sample 1	Target 1	UNKNOWN	SYBR	None	Undetermined	22.1098	9.09855								TRUE	0.196691	TRUE	3	39	No Amp		0	Y	Y	N	N	N	N	N	N	74.4492	Y		N
162	G18	FALSE	Sample 1	Target 1	UNKNOWN	SYBR	None	8.13416	22.1098	9.09855								TRUE	0.196691	TRUE	3	6	No Amp		0.355832	Y	N	Y	Y	Y	N	Y	N	65.6852	Y		Y
163	G19	FALSE	Sample 1	Target 1	UNKNOWN	SYBR	None	Undetermined	22.1098	9.09855								TRUE	0.196691	TRUE	3	25	No Amp		0	Y	N	N	N	N	N	Y	N	81.1998	Y		Y
164	G20	FALSE	Sample 1	Target 1	UNKNOWN	SYBR	None	20.7524	22.1098	9.09855								TRUE	0.196691	TRUE	3	24	No Amp		0.225512	Y	N	Y	N	N	N	Y	N	85.5818	Y		Y
165	G21	FALSE	Sample 1	Target 1	UNKNOWN	SYBR	None	19.8631	22.1098	9.09855								TRUE	0.196691	TRUE	3	23	No Amp		0	Y	N	Y	N	Y	N	Y	N	94.6803	Y		Y
166	G22	FALSE	Sample 1	Target 1	UNKNOWN	SYBR	None	Undetermined	22.1098	9.09855								TRUE	0.196691	TRUE	3	9	No Amp		0	Y	N	N	N	N	N	Y	N	87.5786	Y		Y
167	G23	FALSE	Sample 1	Target 1	UNKNOWN	SYBR	None	Undetermined	22.1098	9.09855								TRUE	0.196691	TRUE	3	18	No Amp		0	Y	N	N	N	N	N	Y	N	71.7182	Y		Y
168	G24	FALSE	Sample 1	Target 1	UNKNOWN	SYBR	None	Undetermined	22.1098	9.09855								TRUE	0.196691	TRUE	3	10	No Amp		0	Y	N	N	N	N	N	Y	Y	93.2599	Y		Y
169	H1	FALSE	Sample 1	Target 1	UNKNOWN	SYBR	None	Undetermined	22.1098	9.09855								TRUE	0.196691	TRUE	3	39	No Amp		0	Y	Y	N	N	N	N	N	N	71.3701	Y		N
170	H2	FALSE	Sample 1	Target 1	UNKNOWN	SYBR	None	Undetermined	22.1098	9.09855								TRUE	0.196691	TRUE	3	14	No Amp		0	Y	N	N	N	N	Y	N	N	62.6061	Y		N
171	H3	FALSE	Sample 1	Target 1	UNKNOWN	SYBR	None	34.8194	22.1098	9.09855								TRUE	0.196691	TRUE	3	23	No Amp		0	Y	N	Y	Y	Y	N	N	N	71.2516	Y		N
172	H4	FALSE	Sample 1	Target 1	UNKNOWN	SYBR	None	28.9859	22.1098	9.09855								TRUE	0.196691	TRUE	3	25	No Amp		0	Y	N	Y	Y	Y	N	N	N	88.5427	Y		N
173	H5	FALSE	Sample 1	Target 1	UNKNOWN	SYBR	None	10.7097	22.1098	9.09855								TRUE	0.196691	TRUE	3	6	No Amp		0.0324467	Y	N	Y	Y	N	N	N	N	92.1101	Y		N
174	H6	FALSE	Sample 1	Target 1	UNKNOWN	SYBR	None	Undetermined	22.1098	9.09855								TRUE	0.196691	TRUE	3	39	No Amp		0	Y	Y	N	N	N	Y	Y	N	67.4652	Y		Y
175	H7	FALSE	Sample 1	Target 1	UNKNOWN	SYBR	None	35.9033	22.1098	9.09855								TRUE	0.196691	TRUE	3	31	No Amp		0	Y	N	Y	N	N	N	N	N	86.0674	N		N
176	H8	FALSE	Sample 1	Target 1	UNKNOWN	SYBR	None	28.7443	22.1098	9.09855								TRUE	0.196691	TRUE	3	26	No Amp		0	Y	N	Y	Y	Y	N	N	N	68.1761	Y		Y
177	H9	FALSE	Sample 1	Target 1	UNKNOWN	SYBR	None	Undetermined	22.1098	9.09855								TRUE	0.196691	TRUE	3	39	No Amp		0	Y	Y	N	N	N	N	N	N	92.4128	N		N
178	H10	FALSE	Sample 1	Target 1	UNKNOWN	SYBR	None	Undetermined	22.1098	9.09855								TRUE	0.196691	TRUE	3	28	No Amp		0	Y	N	N	N	N	N	N	N	71.2384	Y		Y
179	H11	FALSE	Sample 1	Target 1	UNKNOWN	SYBR	None	30.5035	22.1098	9.09855								TRUE	0.196691	TRUE	3	28	No Amp		0	Y	N	Y	Y	N	N	N	N	60.0006	Y		Y
180	H12	FALSE	Sample 1	Target 1	UNKNOWN	SYBR	None	Undetermined	22.1098	9.09855								TRUE	0.196691	TRUE	3	39	No Amp		0	Y	Y	N	N	N	N	N	N	71.2384	Y		N
181	H13	FALSE	Sample 1	Target 1	UNKNOWN	SYBR	None	Undetermined	22.1098	9.09855								TRUE	0.196691	TRUE	3	39	No Amp		0	Y	Y	N	N	N	N	N	N	76.3345	N		Y
182	H14	FALSE	Sample 1	Target 1	UNKNOWN	SYBR	None	Undetermined	22.1098	9.09855								TRUE	0.196691	TRUE	3	39	No Amp		0	Y	Y	N	N	N	N	N	N	63.1962	N		N
183	H15	FALSE	Sample 1	Target 1	UNKNOWN	SYBR	None	38.7515	22.1098	9.09855								TRUE	0.196691	TRUE	3	34	No Amp		0.0351114	Y	N	Y	Y	N	N	N	N	72.1918	Y		N
184	H16	FALSE	Sample 1	Target 1	UNKNOWN	SYBR	None	13.4565	22.1098	9.09855								TRUE	0.196691	TRUE	3	10	No Amp		0.613146	Y	N	Y	Y	N	N	Y	N	61.6575	Y		Y
185	H17	FALSE	Sample 1	Target 1	UNKNOWN	SYBR	None	23.3265	22.1098	9.09855								TRUE	0.196691	TRUE	3	17	No Amp		0	Y	N	Y	Y	Y	N	N	N	60.0005	Y		N
186	H18	FALSE	Sample 1	Target 1	UNKNOWN	SYBR	None	16.265	22.1098	9.09855								TRUE	0.196691	TRUE	3	14	No Amp		0.0166264	Y	N	Y	Y	N	N	Y	N	74.2123	Y		Y
187	H19	FALSE	Sample 1	Target 1	UNKNOWN	SYBR	None	Undetermined	22.1098	9.09855								TRUE	0.196691	TRUE	3	31	No Amp		0	Y	N	N	N	N	N	N	N	94.9379	Y		N
188	H20	FALSE	Sample 1	Target 1	UNKNOWN	SYBR	None	Undetermined	22.1098	9.09855								TRUE	0.196691	TRUE	3	19	No Amp		0	Y	N	N	N	N	Y	Y	N	63.9088	Y		Y
189	H21	FALSE	Sample 1	Target 1	UNKNOWN	SYBR	None	35.0443	22.1098	9.09855								TRUE	0.196691	TRUE	3	34	No Amp		0.201992	Y	N	Y	Y	N	N	N	N	61.0658	Y		N
190	H22	FALSE	Sample 1	Target 1	UNKNOWN	SYBR	None	Undetermined	22.1098	9.09855								TRUE	0.196691	TRUE	3	39	No Amp		0	Y	Y	N	N	N	N	Y	N	94.917	Y		Y
191	H23	FALSE	Sample 1	Target 1	UNKNOWN	SYBR	None	19.9615	22.1098	9.09855								TRUE	0.196691	TRUE	3	12	No Amp		0	Y	N	Y	Y	Y	N	Y	N	86.2766	Y		Y
192	H24	FALSE	Sample 1	Target 1	UNKNOWN	SYBR	None	Undetermined	22.1098	9.09855								TRUE	0.196691	TRUE	3	12	No Amp		0	Y	N	N	N	N	N	N	N	88.1704	Y		N
193	I1	FALSE	Sample 1	Target 1	UNKNOWN	SYBR	None	Undetermined	22.1098	9.09855								TRUE	0.196691	TRUE	3	39	No Amp		0	Y	Y	N	N	N	N	N	N	90.2007	Y		N
194	I2	FALSE	Sample 1	Target 1	UNKNOWN	SYBR	None	31.5855	22.1098	9.09855								TRUE	0.196691	TRUE	3	28	No Amp		0	Y	N	Y	Y	Y	N	N	N	84.2791	Y		N
195	I3	FALSE	Sample 1	Target 1	UNKNOWN	SYBR	None	Undetermined	22.1098	9.09855								TRUE	0.196691	TRUE	3	39	No Amp		0	Y	Y	N	N	N	N	N	N	60.0006	N		N
196	I4	FALSE	Sample 1	Target 1	UNKNOWN	SYBR	None	Undetermined	22.1098	9.09855								TRUE	0.196691	TRUE	3	10	No Amp		0	Y	N	N	N	N	Y	N	N	60.9481	Y		N
197	I5	FALSE	Sample 1	Target 1	UNKNOWN	SYBR	None	15.5006	22.1098	9.09855								TRUE	0.196691	TRUE	3	15	No Amp		0.450212	Y	N	Y	Y	N	N	N	N	67.1097	Y		N
198	I6	FALSE	Sample 1	Target 1	UNKNOWN	SYBR	None	Undetermined	22.1098	9.09855								TRUE	0.196691	TRUE	3	39	No Amp		0	Y	Y	N	N	N	N	N	N	60.0006	Y		N
199	I7	FALSE	Sample 1	Target 1	UNKNOWN	SYBR	None	17.819	22.1098	9.09855								TRUE	0.196691	TRUE	3	15	No Amp		0.147794	Y	N	Y	N	N	N	N	N	73.271	Y		N
200	I8	FALSE	Sample 1	Target 1	UNKNOWN	SYBR	None	Undetermined	22.1098	9.09855								TRUE	0.196691	TRUE	3	39	No Amp		0	Y	Y	N	N	N	N	N	N	88.5556	N		N
201	I9	FALSE	Sample 1	Target 1	UNKNOWN	SYBR	None	Undetermined	22.1098	9.09855								TRUE	0.196691	TRUE	3	33	No Amp		0	Y	N	N	N	N	N	N	N	87.7993	N		N
202	I10	FALSE	Sample 1	Target 1	UNKNOWN	SYBR	None	27.0987	22.1098	9.09855								TRUE	0.196691	TRUE	3	33	No Amp		0	Y	N	Y	Y	N	N	N	N	60.0006	Y		Y
203	I11	FALSE	Sample 1	Target 1	UNKNOWN	SYBR	None	Undetermined	22.1098	9.09855								TRUE	0.196691	TRUE	3	39	No Amp		0	Y	Y	N	N	N	N	N	N	84.1323	Y		Y
204	I12	FALSE	Sample 1	Target 1	UNKNOWN	SYBR	None	Undetermined	22.1098	9.09855								TRUE	0.196691	TRUE	3	39	No Amp		0	Y	Y	N	N	N	N	N	N	60.0006	Y		N
205	I13	FALSE	Sample 1	Target 1	UNKNOWN	SYBR	None	Undetermined	22.1098	9.09855								TRUE	0.196691	TRUE	3	39	No Amp		0	Y	Y	N	N	N	N	Y	N	88.6443	Y		N
206	I14	FALSE	Sample 1	Target 1	UNKNOWN	SYBR	None	33.906	22.1098	9.09855								TRUE	0.196691	TRUE	3	32	No Amp		0	Y	N	Y	Y	N	N	Y	N	61.4208	Y		Y
207	I15	FALSE	Sample 1	Target 1	UNKNOWN	SYBR	None	8.19521	22.1098	9.09855								TRUE	0.196691	TRUE	3	4	No Amp		0.0127957	Y	N	Y	Y	N	N	N	N	60.0004	Y		Y
208	I16	FALSE	Sample 1	Target 1	UNKNOWN	SYBR	None	Undetermined	22.1098	9.09855								TRUE	0.196691	TRUE	3	9	No Amp		0	Y	N	N	N	N	N	N	N	60.0004	Y		N
209	I17	FALSE	Sample 1	Target 1	UNKNOWN	SYBR	None	Undetermined	22.1098	9.09855								TRUE	0.196691	TRUE	3	39	No Amp		0	Y	Y	N	N	N	N	N	N	60.0005	Y		N
210	I18	FALSE	Sample 1	Target 1	UNKNOWN	SYBR	None	Undetermined	22.1098	9.09855								TRUE	0.196691	TRUE	3	39	No Amp		0	Y	Y	N	N	N	N	N	N	60.0005	Y		N
211	I19	FALSE	Sample 1	Target 1	UNKNOWN	SYBR	None	5.44499	22.1098	9.09855								TRUE	0.196691	TRUE	3	4	No Amp		0.457278	Y	N	Y	Y	Y	N	N	N	79.6602	Y		N
212	I20	FALSE	Sample 1	Target 1	UNKNOWN	SYBR	None	Undetermined	22.1098	9.09855								TRUE	0.196691	TRUE	3	39	No Amp		0	Y	Y	N	N	N	N	Y	N	60.0005	Y		Y
213	I21	FALSE	Sample 1	Target 1	UNKNOWN	SYBR	None	20.206	22.1098	9.09855								TRUE	0.196691	TRUE	3	18	No Amp		0	Y	N	Y	Y	Y	N	Y	N	94.917	Y		Y
214	I22	FALSE	Sample 1	Target 1	UNKNOWN	SYBR	None	Undetermined	22.1098	9.09855								TRUE	0.196691	TRUE	3	39	No Amp		0	Y	Y	N	N	N	N	N	N	67.694	Y		Y
215	I23	FALSE	Sample 1	Target 1	UNKNOWN	SYBR	None	Undetermined	22.1098	9.09855								TRUE	0.196691	TRUE	3	39	No Amp		0	Y	Y	N	N	N	N	N	N	60.0005	Y		N
216	I24	FALSE	Sample 1	Target 1	UNKNOWN	SYBR	None	Undetermined	22.1098	9.09855								TRUE	0.196691	TRUE	3	39	No Amp		0	Y	Y	N	N	N	N	N	N	68.049	Y		N
217	J1	FALSE	Sample 1	Target 1	UNKNOWN	SYBR	None	Undetermined	22.1098	9.09855								TRUE	0.196691	TRUE	3	39	No Amp		0	Y	Y	N	N	N	N	N	N	91.2666	Y		N
218	J2	FALSE	Sample 1	Target 1	UNKNOWN	SYBR	None	34.2281	22.1098	9.09855								TRUE	0.196691	TRUE	3	33	No Amp		0.0835168	Y	N	Y	Y	N	N	N	N	66.5144	Y		N
219	J3	FALSE	Sample 1	Target 1	UNKNOWN	SYBR	None	Undetermined	22.1098	9.09855								TRUE	0.196691	TRUE	3	8	No Amp		0	Y	N	N	N	N	Y	Y	N	94.938	Y		Y
220	J4	FALSE	Sample 1	Target 1	UNKNOWN	SYBR	None	Undetermined	22.1098	9.09855								TRUE	0.196691	TRUE	3	39	No Amp		0	Y	Y	N	N	N	N	N	N	61.0665	Y		N
221	J5	FALSE	Sample 1	Target 1	UNKNOWN	SYBR	None	Undetermined	22.1098	9.09855								TRUE	0.196691	TRUE	3	20	No Amp		0	Y	N	N	N	N	N	N	N	69.3609	Y		N
222	J6	FALSE	Sample 1	Target 1	UNKNOWN	SYBR	None	Undetermined	22.1098	9.09855								TRUE	0.196691	TRUE	3	39	No Amp		0	Y	Y	N	N	N	N	N	N	77.181	N		N
223	J7	FALSE	Sample 1	Target 1	UNKNOWN	SYBR	None	20.9613	22.1098	9.09855								TRUE	0.196691	TRUE	3	16	No Amp		0	Y	N	Y	Y	N	N	N	N	94.9538	N		N
224	J8	FALSE	Sample 1	Target 1	UNKNOWN	SYBR	None	34.8509	22.1098	9.09855								TRUE	0.196691	TRUE	3	23	No Amp		0	Y	N	Y	Y	Y	N	N	N	81.2095	N		Y
225	J9	FALSE	Sample 1	Target 1	UNKNOWN	SYBR	None	Undetermined	22.1098	9.09855								TRUE	0.196691	TRUE	3	39	No Amp		0	Y	Y	N	N	N	N	N	N	94.8969	N		N
226	J10	FALSE	Sample 1	Target 1	UNKNOWN	SYBR	None	27.5711	22.1098	9.09855								TRUE	0.196691	TRUE	3	25	No Amp		0	Y	N	Y	Y	N	N	N	N	77.0347	Y		Y
227	J11	FALSE	Sample 1	Target 1	UNKNOWN	SYBR	None	Undetermined	22.1098	9.09855								TRUE	0.196691	TRUE	3	39	No Amp		0	Y	Y	N	N	N	N	N	N	84.1323	Y		Y
228	J12	FALSE	Sample 1	Target 1	UNKNOWN	SYBR	None	Undetermined	22.1098	9.09855								TRUE	0.196691	TRUE	3	39	No Amp		0	Y	Y	N	N	N	N	N	N	90.5201	N		Y
229	J13	FALSE	Sample 1	Target 1	UNKNOWN	SYBR	None	Undetermined	22.1098	9.09855								TRUE	0.196691	TRUE	3	39	Inconclusive		0	Y	Y	N	N	N	N	Y	N	60.0004	Y		Y
230	J14	FALSE	Sample 1	Target 1	UNKNOWN	SYBR	None	34.6546	22.1098	9.09855								TRUE	0.196691	TRUE	3	35	No Amp		0.483016	Y	N	Y	Y	N	N	N	N	94.9176	Y		N
231	J15	FALSE	Sample 1	Target 1	UNKNOWN	SYBR	None	Undetermined	22.1098	9.09855								TRUE	0.196691	TRUE	3	39	No Amp		0	Y	Y	N	N	N	N	N	N	88.0525	Y		Y
232	J16	FALSE	Sample 1	Target 1	UNKNOWN	SYBR	None	Undetermined	22.1098	9.09855								TRUE	0.196691	TRUE	3	39	No Amp		0	Y	Y	N	N	N	N	N	N	86.3954	Y		N
233	J17	FALSE	Sample 1	Target 1	UNKNOWN	SYBR	None	Undetermined	22.1098	9.09855								TRUE	0.196691	TRUE	3	31	No Amp		0	Y	N	N	N	N	N	N	N	62.1323	Y		N
234	J18	FALSE	Sample 1	Target 1	UNKNOWN	SYBR	None	Undetermined	22.1098	9.09855								TRUE	0.196691	TRUE	3	39	No Amp		0	Y	Y	N	N	N	N	Y	N	69.3566	Y		Y
235	J19	FALSE	Sample 1	Target 1	UNKNOWN	SYBR	None	Undetermined	22.1098	9.09855								TRUE	0.196691	TRUE	3	39	No Amp		0	Y	Y	N	N	N	N	Y	N	87.2398	Y		Y
236	J20	FALSE	Sample 1	Target 1	UNKNOWN	SYBR	None	19.7706	22.1098	9.09855								TRUE	0.196691	TRUE	3	18	No Amp		0.393003	Y	N	Y	N	N	N	Y	N	60.0005	Y		Y
237	J21	FALSE	Sample 1	Target 1	UNKNOWN	SYBR	None	Undetermined	22.1098	9.09855								TRUE	0.196691	TRUE	3	10	No Amp		0	Y	N	N	N	N	N	Y	N	60.0005	Y		Y
238	J22	FALSE	Sample 1	Target 1	UNKNOWN	SYBR	None	29.6174	22.1098	9.09855								TRUE	0.196691	TRUE	3	26	No Amp		0	Y	N	Y	N	Y	N	Y	N	76.0976	Y		Y
239	J23	FALSE	Sample 1	Target 1	UNKNOWN	SYBR	None	30.3572	22.1098	9.09855								TRUE	0.196691	TRUE	3	33	No Amp		0	Y	N	Y	N	N	N	Y	N	81.5422	Y		Y
240	J24	FALSE	Sample 1	Target 1	UNKNOWN	SYBR	None	11.6143	22.1098	9.09855								TRUE	0.196691	TRUE	3	8	No Amp		0	Y	N	Y	Y	Y	N	N	N	60.0005	Y		N
241	K1	FALSE	Sample 1	Target 1	UNKNOWN	SYBR	None	16.9069	22.1098	9.09855								TRUE	0.196691	TRUE	3	13	No Amp		0	Y	N	Y	Y	Y	N	N	N	86.4109	Y		N
242	K2	FALSE	Sample 1	Target 1	UNKNOWN	SYBR	None	7.509	22.1098	9.09855								TRUE	0.196691	TRUE	3	5	No Amp		0	Y	N	Y	Y	Y	N	N	N	75.9889	Y		Y
243	K3	FALSE	Sample 1	Target 1	UNKNOWN	SYBR	None	9.31063	22.1098	9.09855								TRUE	0.196691	TRUE	3	8	No Amp		0	Y	N	Y	Y	N	N	N	N	60.0006	Y		N
244	K4	FALSE	Sample 1	Target 1	UNKNOWN	SYBR	None	Undetermined	22.1098	9.09855								TRUE	0.196691	TRUE	3	39	No Amp		0	Y	Y	N	N	N	N	N	N	86.5293	Y		N
245	K5	FALSE	Sample 1	Target 1	UNKNOWN	SYBR	None	16.055	22.1098	9.09855								TRUE	0.196691	TRUE	3	15	No Amp		0.260499	Y	N	Y	Y	N	N	N	N	88.0816	Y		N
246	K6	FALSE	Sample 1	Target 1	UNKNOWN	SYBR	None	5.5398	22.1098	9.09855								TRUE	0.196691	TRUE	3	4	No Amp		0.683242	Y	N	Y	Y	N	N	N	N	83.4607	Y		N
247	K7	FALSE	Sample 1	Target 1	UNKNOWN	SYBR	None	Undetermined	22.1098	9.09855								TRUE	0.196691	TRUE	3	29	No Amp		0	Y	N	N	N	N	Y	N	N	90.5698	Y		N
248	K8	FALSE	Sample 1	Target 1	UNKNOWN	SYBR	None	Undetermined	22.1098	9.09855								TRUE	0.196691	TRUE	3	39	No Amp		0	Y	Y	N	N	N	N	N	N	60.0006	N		N
249	K9	FALSE	Sample 1	Target 1	UNKNOWN	SYBR	None	Undetermined	22.1098	9.09855								TRUE	0.196691	TRUE	3	39	No Amp		0	Y	Y	N	N	N	Y	N	N	60.0006	N		N
250	K10	FALSE	Sample 1	Target 1	UNKNOWN	SYBR	None	Undetermined	22.1098	9.09855								TRUE	0.196691	TRUE	3	39	No Amp		0	Y	Y	N	N	N	N	N	N	72.6579	Y		Y
251	K11	FALSE	Sample 1	Target 1	UNKNOWN	SYBR	None	35.9986	22.1098	9.09855								TRUE	0.196691	TRUE	3	34	No Amp		0.42591	Y	N	Y	Y	N	N	N	N	63.6677	Y		N
252	K12	FALSE	Sample 1	Target 1	UNKNOWN	SYBR	None	Undetermined	22.1098	9.09855								TRUE	0.196691	TRUE	3	39	No Amp		0	Y	Y	N	N	N	N	N	N	86.025	Y		N
253	K13	FALSE	Sample 1	Target 1	UNKNOWN	SYBR	None	Undetermined	22.1098	9.09855								TRUE	0.196691	TRUE	3	5	No Amp		0	Y	N	N	N	N	N	N	N	86.5138	Y		N
254	K14	FALSE	Sample 1	Target 1	UNKNOWN	SYBR	None	Undetermined	22.1098	9.09855								TRUE	0.196691	TRUE	3	39	No Amp		0	Y	Y	N	N	N	N	N	N	75.6244	Y		N
255	K15	FALSE	Sample 1	Target 1	UNKNOWN	SYBR	None	8.4351	22.1098	9.09855								TRUE	0.196691	TRUE	3	5	No Amp		0	Y	N	Y	Y	N	N	N	N	61.6575	Y		N
256	K16	FALSE	Sample 1	Target 1	UNKNOWN	SYBR	None	10.802	22.1098	9.09855								TRUE	0.196691	TRUE	3	12	No Amp		0.553275	Y	N	Y	Y	N	N	Y	N	87.224	Y		N
257	K17	FALSE	Sample 1	Target 1	UNKNOWN	SYBR	None	Undetermined	22.1098	9.09855								TRUE	0.196691	TRUE	3	39	No Amp		0	Y	Y	N	N	N	N	Y	N	79.7786	Y		Y
258	K18	FALSE	Sample 1	Target 1	UNKNOWN	SYBR	None	16.5266	22.1098	9.09855								TRUE	0.196691	TRUE	3	13	No Amp		0	Y	N	Y	Y	N	N	Y	N	60.2374	Y		Y
259	K19	FALSE	Sample 1	Target 1	UNKNOWN	SYBR	None	Undetermined	22.1098	9.09855								TRUE	0.196691	TRUE	3	39	No Amp		0	Y	Y	N	N	N	N	Y	N	92.6877	Y		Y
260	K20	FALSE	Sample 1	Target 1	UNKNOWN	SYBR	None	Undetermined	22.1098	9.09855								TRUE	0.196691	TRUE	3	39	No Amp		0	Y	Y	N	N	N	N	Y	N	71.7253	Y		Y
261	K21	FALSE	Sample 1	Target 1	UNKNOWN	SYBR	None	Undetermined	22.1098	9.09855								TRUE	0.196691	TRUE	3	39	No Amp		0	Y	Y	N	N	N	N	Y	N	86.6317	Y		Y
262	K22	FALSE	Sample 1	Target 1	UNKNOWN	SYBR	None	Undetermined	22.1098	9.09855								TRUE	0.196691	TRUE	3	39	No Amp		0	Y	Y	N	N	N	N	Y	N	61.0658	Y		Y
263	K23	FALSE	Sample 1	Target 1	UNKNOWN	SYBR	None	Undetermined	22.1098	9.09855								TRUE	0.196691	TRUE	3	39	No Amp		0	Y	Y	N	N	N	N	N	N	60.0005	N		N
264	K24	FALSE	Sample 1	Target 1	UNKNOWN	SYBR	None	14.384	22.1098	9.09855								TRUE	0.196691	TRUE	3	13	No Amp		0	Y	N	Y	Y	N	N	N	N	64.9717	Y		Y
265	L1	FALSE	Sample 1	Target 1	UNKNOWN	SYBR	None	16.9895	22.1098	9.09855								TRUE	0.196691	TRUE	3	14	No Amp		0	Y	N	Y	Y	Y	N	N	N	79.0681	Y		N
266	L2	FALSE	Sample 1	Target 1	UNKNOWN	SYBR	None	19.9862	22.1098	9.09855								TRUE	0.196691	TRUE	3	23	No Amp		0	Y	N	Y	Y	N	N	Y	N	69.3567	Y		Y
267	L3	FALSE	Sample 1	Target 1	UNKNOWN	SYBR	None	Undetermined	22.1098	9.09855								TRUE	0.196691	TRUE	3	39	No Amp		0	Y	Y	N	N	N	N	Y	N	66.9881	Y		Y
268	L4	FALSE	Sample 1	Target 1	UNKNOWN	SYBR	None	Undetermined	22.1098	9.09855								TRUE	0.196691	TRUE	3	39	No Amp		0	Y	Y	N	N	N	N	Y	N	94.938	Y		N
269	L5	FALSE	Sample 1	Target 1	UNKNOWN	SYBR	None	7.91699	22.1098	9.09855								TRUE	0.196691	TRUE	3	7	No Amp		0.549363	Y	N	Y	Y	Y	N	N	N	60.0006	Y		N
270	L6	FALSE	Sample 1	Target 1	UNKNOWN	SYBR	None	27.2656	22.1098	9.09855								TRUE	0.196691	TRUE	3	34	No Amp		0	Y	N	Y	Y	N	N	N	N	67.3467	Y		N
271	L7	FALSE	Sample 1	Target 1	UNKNOWN	SYBR	None	Undetermined	22.1098	9.09855								TRUE	0.196691	TRUE	3	39	No Amp		0	Y	Y	N	N	N	N	N	N	94.9538	Y		N
272	L8	FALSE	Sample 1	Target 1	UNKNOWN	SYBR	None	Undetermined	22.1098	9.09855								TRUE	0.196691	TRUE	3	39	No Amp		0	Y	Y	N	N	N	N	N	N	88.3186	N		N
273	L9	FALSE	Sample 1	Target 1	UNKNOWN	SYBR	None	29.3296	22.1098	9.09855								TRUE	0.196691	TRUE	3	19	No Amp		0	Y	N	Y	Y	N	N	N	N	82.9494	N		N
274	L10	FALSE	Sample 1	Target 1	UNKNOWN	SYBR	None	Undetermined	22.1098	9.09855								TRUE	0.196691	TRUE	3	39	No Amp		0	Y	Y	N	N	N	N	N	N	94.8969	N		N
275	L11	FALSE	Sample 1	Target 1	UNKNOWN	SYBR	None	27.4648	22.1098	9.09855								TRUE	0.196691	TRUE	3	30	No Amp		0	Y	N	Y	N	N	N	N	N	63.0762	Y		N
276	L12	FALSE	Sample 1	Target 1	UNKNOWN	SYBR	None	22.7021	22.1098	9.09855								TRUE	0.196691	TRUE	3	27	No Amp		0	Y	N	Y	Y	N	N	N	N	88.1542	Y		N
277	L13	FALSE	Sample 1	Target 1	UNKNOWN	SYBR	None	27.0201	22.1098	9.09855								TRUE	0.196691	TRUE	3	24	No Amp		0	Y	N	Y	Y	N	N	N	N	62.9595	Y		Y
278	L14	FALSE	Sample 1	Target 1	UNKNOWN	SYBR	None	11.9374	22.1098	9.09855								TRUE	0.196691	TRUE	3	10	No Amp		0.49063	Y	N	Y	Y	N	N	N	N	87.3423	Y		Y
279	L15	FALSE	Sample 1	Target 1	UNKNOWN	SYBR	None	Undetermined	22.1098	9.09855								TRUE	0.196691	TRUE	3	39	No Amp		0	Y	Y	N	N	N	N	N	N	88.0525	Y		N
280	L16	FALSE	Sample 1	Target 1	UNKNOWN	SYBR	None	26.3965	22.1098	9.09855								TRUE	0.196691	TRUE	3	29	No Amp		0	Y	N	Y	Y	N	N	N	N	93.734	Y		N
281	L17	FALSE	Sample 1	Target 1	UNKNOWN	SYBR	None	Undetermined	22.1098	9.09855								TRUE	0.196691	TRUE	3	39	No Amp		0	Y	Y	N	N	N	N	N	N	63.5535	Y		N
282	L18	FALSE	Sample 1	Target 1	UNKNOWN	SYBR	None	5.33472	22.1098	9.09855								TRUE	0.196691	TRUE	3	4	No Amp		0.654765	Y	N	Y	Y	Y	N	Y	N	60.0005	Y		Y
283	L19	FALSE	Sample 1	Target 1	UNKNOWN	SYBR	None	24.6159	22.1098	9.09855								TRUE	0.196691	TRUE	3	20	No Amp		0	Y	N	Y	Y	Y	N	Y	N	66.0405	Y		Y
284	L20	FALSE	Sample 1	Target 1	UNKNOWN	SYBR	None	Undetermined	22.1098	9.09855								TRUE	0.196691	TRUE	3	39	No Amp		0	Y	Y	N	N	N	N	Y	N	65.3299	Y		Y
285	L21	FALSE	Sample 1	Target 1	UNKNOWN	SYBR	None	Undetermined	22.1098	9.09855								TRUE	0.196691	TRUE	3	39	No Amp		0	Y	Y	N	N	N	N	Y	N	82.4891	Y		Y
286	L22	FALSE	Sample 1	Target 1	UNKNOWN	SYBR	None	29.0728	22.1098	9.09855								TRUE	0.196691	TRUE	3	24	No Amp		0	Y	N	Y	Y	N	N	N	N	88.2888	Y		N
287	L23	FALSE	Sample 1	Target 1	UNKNOWN	SYBR	None	Undetermined	22.1098	9.09855								TRUE	0.196691	TRUE	3	12	No Amp		0	Y	N	N	N	N	N	Y	N	88.2888	Y		Y
288	L24	FALSE	Sample 1	Target 1	UNKNOWN	SYBR	None	9.52674	22.1098	9.09855								TRUE	0.196691	TRUE	3	8	No Amp		0.666449	Y	N	Y	Y	N	N	Y	N	72.0733	Y		Y
289	M1	FALSE	Sample 1	Target 1	UNKNOWN	SYBR	None	32.4263	22.1098	9.09855								TRUE	0.196691	TRUE	3	26	No Amp		0.469748	Y	N	Y	Y	Y	N	N	N	81.6736	Y		N
290	M2	FALSE	Sample 1	Target 1	UNKNOWN	SYBR	None	Undetermined	22.1098	9.09855								TRUE	0.196691	TRUE	3	39	No Amp		0	Y	Y	N	N	N	N	Y	N	60.0006	Y		Y
291	M3	FALSE	Sample 1	Target 1	UNKNOWN	SYBR	None	Undetermined	22.1098	9.09855								TRUE	0.196691	TRUE	3	39	No Amp		0	Y	Y	N	N	N	N	N	N	78.2391	Y		N
292	M4	FALSE	Sample 1	Target 1	UNKNOWN	SYBR	None	Undetermined	22.1098	9.09855								TRUE	0.196691	TRUE	3	8	No Amp		0	Y	N	N	N	N	Y	Y	N	94.938	Y		Y
293	M5	FALSE	Sample 1	Target 1	UNKNOWN	SYBR	None	Undetermined	22.1098	9.09855								TRUE	0.196691	TRUE	3	15	No Amp		0	Y	N	N	N	N	N	Y	N	69.7164	Y		Y
294	M6	FALSE	Sample 1	Target 1	UNKNOWN	SYBR	None	10.588	22.1098	9.09855								TRUE	0.196691	TRUE	3	8	No Amp		0.471829	Y	N	Y	Y	N	N	N	N	66.0434	Y		N
295	M7	FALSE	Sample 1	Target 1	UNKNOWN	SYBR	None	33.5036	22.1098	9.09855								TRUE	0.196691	TRUE	3	32	No Amp		0.129384	Y	N	Y	Y	N	N	N	N	60.0006	Y		Y
296	M8	FALSE	Sample 1	Target 1	UNKNOWN	SYBR	None	18.2881	22.1098	9.09855								TRUE	0.196691	TRUE	3	17	No Amp		0	Y	N	Y	N	N	N	N	N	62.1333	Y		N
297	M9	FALSE	Sample 1	Target 1	UNKNOWN	SYBR	None	33.7601	22.1098	9.09855								TRUE	0.196691	TRUE	3	31	No Amp		0.0681068	Y	N	Y	N	N	N	N	N	60.5921	N		N
298	M10	FALSE	Sample 1	Target 1	UNKNOWN	SYBR	None	22.6866	22.1098	9.09855								TRUE	0.196691	TRUE	3	19	No Amp		0	Y	N	Y	N	N	N	N	N	64.8506	Y		N
299	M11	FALSE	Sample 1	Target 1	UNKNOWN	SYBR	None	Undetermined	22.1098	9.09855								TRUE	0.196691	TRUE	3	39	No Amp		0	Y	Y	N	N	N	N	N	N	69.464	Y		N
300	M12	FALSE	Sample 1	Target 1	UNKNOWN	SYBR	None	Undetermined	22.1098	9.09855								TRUE	0.196691	TRUE	3	22	No Amp		0	Y	N	N	N	N	N	N	N	71.3567	Y		N
301	M13	FALSE	Sample 1	Target 1	UNKNOWN	SYBR	None	9.50723	22.1098	9.09855								TRUE	0.196691	TRUE	3	8	No Amp		0.079714	Y	N	Y	Y	N	N	N	N	94.9176	Y		Y
302	M14	FALSE	Sample 1	Target 1	UNKNOWN	SYBR	None	31.8805	22.1098	9.09855								TRUE	0.196691	TRUE	3	26	No Amp		0	Y	N	Y	Y	N	N	N	N	94.9176	Y		Y
303	M15	FALSE	Sample 1	Target 1	UNKNOWN	SYBR	None	9.00967	22.1098	9.09855								TRUE	0.196691	TRUE	3	7	No Amp		0.607944	Y	N	Y	Y	N	N	N	N	60.0004	Y		N
304	M16	FALSE	Sample 1	Target 1	UNKNOWN	SYBR	None	Undetermined	22.1098	9.09855								TRUE	0.196691	TRUE	3	39	No Amp		0	Y	Y	N	N	N	N	N	N	76.9264	Y		N
305	M17	FALSE	Sample 1	Target 1	UNKNOWN	SYBR	None	Undetermined	22.1098	9.09855								TRUE	0.196691	TRUE	3	10	No Amp		0	Y	N	N	N	N	N	Y	N	64.8562	Y		Y
306	M18	FALSE	Sample 1	Target 1	UNKNOWN	SYBR	None	28.4135	22.1098	9.09855								TRUE	0.196691	TRUE	3	23	No Amp		0	Y	N	Y	Y	Y	N	N	N	64.264	Y		N
307	M19	FALSE	Sample 1	Target 1	UNKNOWN	SYBR	None	Undetermined	22.1098	9.09855								TRUE	0.196691	TRUE	3	39	No Amp		0	Y	Y	N	N	N	Y	N	N	60.0005	Y		N
308	M20	FALSE	Sample 1	Target 1	UNKNOWN	SYBR	None	27.0843	22.1098	9.09855								TRUE	0.196691	TRUE	3	24	No Amp		0	Y	N	Y	Y	N	N	Y	N	60.0005	Y		Y
309	M21	FALSE	Sample 1	Target 1	UNKNOWN	SYBR	None	Undetermined	22.1098	9.09855								TRUE	0.196691	TRUE	3	12	No Amp		0	Y	N	N	N	N	Y	Y	N	70.1796	Y		Y
310	M22	FALSE	Sample 1	Target 1	UNKNOWN	SYBR	None	11.9076	22.1098	9.09855								TRUE	0.196691	TRUE	3	11	No Amp		0	Y	N	Y	Y	N	N	N	N	60.0005	Y		N
311	M23	FALSE	Sample 1	Target 1	UNKNOWN	SYBR	None	Undetermined	22.1098	9.09855								TRUE	0.196691	TRUE	3	39	No Amp		0	Y	Y	N	N	N	N	Y	N	69.351	Y		Y
312	M24	FALSE	Sample 1	Target 1	UNKNOWN	SYBR	None	9.68312	22.1098	9.09855								TRUE	0.196691	TRUE	3	8	No Amp		0.274708	Y	N	Y	Y	N	N	N	N	60.0005	Y		N
313	N1	FALSE	Sample 1	Target 1	UNKNOWN	SYBR	None	Undetermined	22.1098	9.09855								TRUE	0.196691	TRUE	3	39	No Amp		0	Y	Y	N	N	N	N	N	N	64.2641	Y		N
314	N2	FALSE	Sample 1	Target 1	UNKNOWN	SYBR	None	Undetermined	22.1098	9.09855								TRUE	0.196691	TRUE	3	39	No Amp		0	Y	Y	N	N	N	N	N	N	94.938	Y		N
315	N3	FALSE	Sample 1	Target 1	UNKNOWN	SYBR	None	13.9322	22.1098	9.09855								TRUE	0.196691	TRUE	3	12	No Amp		0	Y	N	Y	Y	Y	N	N	N	71.3701	Y		N
316	N4	FALSE	Sample 1	Target 1	UNKNOWN	SYBR	None	31.1474	22.1098	9.09855								TRUE	0.196691	TRUE	3	30	No Amp		0	Y	N	Y	Y	N	N	N	N	60.0006	Y		N
317	N5	FALSE	Sample 1	Target 1	UNKNOWN	SYBR	None	Undetermined	22.1098	9.09855								TRUE	0.196691	TRUE	3	13	No Amp		0	Y	N	N	N	N	Y	N	N	89.2665	Y		N
318	N6	FALSE	Sample 1	Target 1	UNKNOWN	SYBR	None	11.4925	22.1098	9.09855								TRUE	0.196691	TRUE	3	7	No Amp		0	Y	N	Y	Y	Y	N	N	N	94.9538	Y		N
319	N7	FALSE	Sample 1	Target 1	UNKNOWN	SYBR	None	26.1273	22.1098	9.09855								TRUE	0.196691	TRUE	3	19	No Amp		0	Y	N	Y	Y	Y	N	N	N	77.6549	Y		N
320	N8	FALSE	Sample 1	Target 1	UNKNOWN	SYBR	None	Undetermined	22.1098	9.09855								TRUE	0.196691	TRUE	3	39	No Amp		0	Y	Y	N	N	N	N	N	N	81.2095	Y		N
321	N9	FALSE	Sample 1	Target 1	UNKNOWN	SYBR	None	Undetermined	22.1098	9.09855								TRUE	0.196691	TRUE	3	39	No Amp		0	Y	Y	N	N	N	N	N	N	86.3798	N		N
322	N10	FALSE	Sample 1	Target 1	UNKNOWN	SYBR	None	10.0404	22.1098	9.09855								TRUE	0.196691	TRUE	3	9	No Amp		0.453126	Y	N	Y	Y	N	N	N	N	74.7872	Y		Y
323	N11	FALSE	Sample 1	Target 1	UNKNOWN	SYBR	None	Undetermined	22.1098	9.09855								TRUE	0.196691	TRUE	3	39	No Amp		0	Y	Y	N	N	N	N	N	N	73.2494	Y		N
324	N12	FALSE	Sample 1	Target 1	UNKNOWN	SYBR	None	34.0397	22.1098	9.09855								TRUE	0.196691	TRUE	3	31	No Amp		0.20906	Y	N	Y	Y	N	N	N	N	73.3677	N		N
325	N13	FALSE	Sample 1	Target 1	UNKNOWN	SYBR	None	Undetermined	22.1098	9.09855								TRUE	0.196691	TRUE	3	39	No Amp		0	Y	Y	N	N	N	N	N	N	92.6687	Y		N
326	N14	FALSE	Sample 1	Target 1	UNKNOWN	SYBR	None	Undetermined	22.1098	9.09855								TRUE	0.196691	TRUE	3	39	No Amp		0	Y	Y	N	N	N	N	N	N	63.788	N		N
327	N15	FALSE	Sample 1	Target 1	UNKNOWN	SYBR	None	37.4782	22.1098	9.09855								TRUE	0.196691	TRUE	3	33	No Amp		0	Y	N	Y	N	N	N	N	N	60.3555	Y		N
328	N16	FALSE	Sample 1	Target 1	UNKNOWN	SYBR	None	18.3427	22.1098	9.09855								TRUE	0.196691	TRUE	3	16	No Amp		0.122919	Y	N	Y	Y	N	N	N	N	66.8655	Y		N
329	N17	FALSE	Sample 1	Target 1	UNKNOWN	SYBR	None	29.7053	22.1098	9.09855								TRUE	0.196691	TRUE	3	27	No Amp		0	Y	N	Y	Y	N	N	N	N	76.4625	Y		N
330	N18	FALSE	Sample 1	Target 1	UNKNOWN	SYBR	None	Undetermined	22.1098	9.09855								TRUE	0.196691	TRUE	3	39	No Amp		0	Y	Y	N	N	N	N	N	N	92.214	Y		N
331	N19	FALSE	Sample 1	Target 1	UNKNOWN	SYBR	None	Undetermined	22.1098	9.09855								TRUE	0.196691	TRUE	3	39	No Amp		0	Y	Y	N	N	N	N	Y	N	68.1723	Y		Y
332	N20	FALSE	Sample 1	Target 1	UNKNOWN	SYBR	None	Undetermined	22.1098	9.09855								TRUE	0.196691	TRUE	3	39	No Amp		0	Y	Y	N	N	N	N	N	N	86.8845	Y		N
333	N21	FALSE	Sample 1	Target 1	UNKNOWN	SYBR	None	Undetermined	22.1098	9.09855								TRUE	0.196691	TRUE	3	39	No Amp		0	Y	Y	N	N	N	N	N	N	94.917	N		N
334	N22	FALSE	Sample 1	Target 1	UNKNOWN	SYBR	None	26.8637	22.1098	9.09855								TRUE	0.196691	TRUE	3	24	No Amp		0	Y	N	Y	Y	N	N	Y	N	89.9458	Y		Y
335	N23	FALSE	Sample 1	Target 1	UNKNOWN	SYBR	None	Undetermined	22.1098	9.09855								TRUE	0.196691	TRUE	3	39	No Amp		0	Y	Y	N	N	N	N	Y	N	68.6409	Y		Y
336	N24	FALSE	Sample 1	Target 1	UNKNOWN	SYBR	None	Undetermined	22.1098	9.09855								TRUE	0.196691	TRUE	3	39	No Amp		0	Y	Y	N	N	N	N	Y	N	79.0566	Y		Y
337	O1	FALSE	Sample 1	Target 1	UNKNOWN	SYBR	None	17.2323	22.1098	9.09855								TRUE	0.196691	TRUE	3	14	No Amp		0	Y	N	Y	Y	Y	N	N	N	80.4893	Y		N
338	O2	FALSE	Sample 1	Target 1	UNKNOWN	SYBR	None	26.2266	22.1098	9.09855								TRUE	0.196691	TRUE	3	24	No Amp		0.74547	Y	N	Y	Y	Y	N	Y	N	61.0665	Y		Y
339	O3	FALSE	Sample 1	Target 1	UNKNOWN	SYBR	None	Undetermined	22.1098	9.09855								TRUE	0.196691	TRUE	3	39	No Amp		0	Y	Y	N	N	N	N	N	N	60.0006	Y		N
340	O4	FALSE	Sample 1	Target 1	UNKNOWN	SYBR	None	11.5618	22.1098	9.09855								TRUE	0.196691	TRUE	3	9	No Amp		0	Y	N	Y	Y	N	N	Y	N	94.938	Y		N
341	O5	FALSE	Sample 1	Target 1	UNKNOWN	SYBR	None	Undetermined	22.1098	9.09855								TRUE	0.196691	TRUE	3	16	No Amp		0	Y	N	N	N	N	Y	Y	N	62.9627	Y		Y
342	O6	FALSE	Sample 1	Target 1	UNKNOWN	SYBR	None	Undetermined	22.1098	9.09855								TRUE	0.196691	TRUE	3	39	No Amp		0	Y	Y	N	N	N	N	N	N	68.5315	Y		N
343	O7	FALSE	Sample 1	Target 1	UNKNOWN	SYBR	None	Undetermined	22.1098	9.09855								TRUE	0.196691	TRUE	3	39	No Amp		0	Y	Y	N	N	N	N	N	N	63.3182	Y		Y
344	O8	FALSE	Sample 1	Target 1	UNKNOWN	SYBR	None	Undetermined	22.1098	9.09855								TRUE	0.196691	TRUE	3	11	No Amp		0	Y	N	N	N	N	N	N	N	94.9538	Y		N
345	O9	FALSE	Sample 1	Target 1	UNKNOWN	SYBR	None	Undetermined	22.1098	9.09855								TRUE	0.196691	TRUE	3	39	No Amp		0	Y	Y	N	N	N	N	N	N	90.875	Y		N
346	O10	FALSE	Sample 1	Target 1	UNKNOWN	SYBR	None	29.6302	22.1098	9.09855								TRUE	0.196691	TRUE	3	26	No Amp		0	Y	N	Y	Y	Y	N	N	N	73.3677	Y		N
347	O11	FALSE	Sample 1	Target 1	UNKNOWN	SYBR	None	Undetermined	22.1098	9.09855								TRUE	0.196691	TRUE	3	39	No Amp		0	Y	Y	N	N	N	N	N	N	84.9603	Y		Y
348	O12	FALSE	Sample 1	Target 1	UNKNOWN	SYBR	None	21.5028	22.1098	9.09855								TRUE	0.196691	TRUE	3	19	No Amp		0.428647	Y	N	Y	Y	N	N	N	N	94.8969	Y		N
349	O13	FALSE	Sample 1	Target 1	UNKNOWN	SYBR	None	14.8916	22.1098	9.09855								TRUE	0.196691	TRUE	3	13	No Amp		0.279088	Y	N	Y	Y	N	N	N	N	60.0004	Y		N
350	O14	FALSE	Sample 1	Target 1	UNKNOWN	SYBR	None	25.2823	22.1098	9.09855								TRUE	0.196691	TRUE	3	23	No Amp		0	Y	N	Y	Y	Y	N	N	N	93.4972	Y		Y
351	O15	FALSE	Sample 1	Target 1	UNKNOWN	SYBR	None	25.8811	22.1098	9.09855								TRUE	0.196691	TRUE	3	19	No Amp		0.0532456	Y	N	Y	Y	N	N	N	N	94.9176	Y		N
352	O16	FALSE	Sample 1	Target 1	UNKNOWN	SYBR	None	30.0139	22.1098	9.09855								TRUE	0.196691	TRUE	3	29	No Amp		0	Y	N	Y	Y	Y	N	N	N	77.6365	Y		N
353	O17	FALSE	Sample 1	Target 1	UNKNOWN	SYBR	None	15.3622	22.1098	9.09855								TRUE	0.196691	TRUE	3	20	No Amp		0	Y	N	Y	Y	N	N	N	N	60.0005	Y		Y
354	O18	FALSE	Sample 1	Target 1	UNKNOWN	SYBR	None	Undetermined	22.1098	9.09855								TRUE	0.196691	TRUE	3	39	No Amp		0	Y	Y	N	N	N	N	N	N	78.3574	Y		N
355	O19	FALSE	Sample 1	Target 1	UNKNOWN	SYBR	None	Undetermined	22.1098	9.09855								TRUE	0.196691	TRUE	3	39	No Amp		0	Y	Y	N	N	N	Y	Y	Y	60.0005	Y		Y
356	O20	FALSE	Sample 1	Target 1	UNKNOWN	SYBR	None	4.68421	22.1098	9.09855								TRUE	0.196691	TRUE	3	4	No Amp		0	Y	N	Y	Y	N	N	N	N	79.1865	Y		N
357	O21	FALSE	Sample 1	Target 1	UNKNOWN	SYBR	None	Undetermined	22.1098	9.09855								TRUE	0.196691	TRUE	3	20	No Amp		0	Y	N	N	N	N	Y	Y	N	63.5513	Y		N
358	O22	FALSE	Sample 1	Target 1	UNKNOWN	SYBR	None	23.0917	22.1098	9.09855								TRUE	0.196691	TRUE	3	20	No Amp		0.468081	Y	N	Y	Y	Y	N	N	N	89.1173	Y		N
359	O23	FALSE	Sample 1	Target 1	UNKNOWN	SYBR	None	Undetermined	22.1098	9.09855								TRUE	0.196691	TRUE	3	39	No Amp		0	Y	Y	N	N	N	N	Y	N	93.615	Y		Y
360	O24	FALSE	Sample 1	Target 1	UNKNOWN	SYBR	None	Undetermined	22.1098	9.09855								TRUE	0.196691	TRUE	3	25	No Amp		0	Y	N	N	N	N	Y	Y	Y	94.917	Y		Y
361	P1	FALSE	Sample 1	Target 1	UNKNOWN	SYBR	None	Undetermined	22.1098	9.09855								TRUE	0.196691	TRUE	3	14	No Amp		0	Y	N	N	N	N	N	N	N	94.7011	Y		N
362	P2	FALSE	Sample 1	Target 1	UNKNOWN	SYBR	None	Undetermined	22.1098	9.09855								TRUE	0.196691	TRUE	3	39	No Amp		0	Y	Y	N	N	N	N	N	N	81.9105	Y		N
363	P3	FALSE	Sample 1	Target 1	UNKNOWN	SYBR	None	Undetermined	22.1098	9.09855								TRUE	0.196691	TRUE	3	39	No Amp		0	Y	Y	N	N	N	N	N	N	60.0006	Y		N
364	P4	FALSE	Sample 1	Target 1	UNKNOWN	SYBR	None	Undetermined	22.1098	9.09855								TRUE	0.196691	TRUE	3	39	No Amp		0	Y	Y	N	N	N	N	N	N	94.2274	Y		N
365	P5	FALSE	Sample 1	Target 1	UNKNOWN	SYBR	None	Undetermined	22.1098	9.09855								TRUE	0.196691	TRUE	3	39	No Amp		0	Y	Y	N	N	N	N	N	N	81.2095	Y		N
366	P6	FALSE	Sample 1	Target 1	UNKNOWN	SYBR	None	27.7084	22.1098	9.09855								TRUE	0.196691	TRUE	3	24	No Amp		0.281174	Y	N	Y	Y	Y	N	N	N	92.2286	Y		N
367	P7	FALSE	Sample 1	Target 1	UNKNOWN	SYBR	None	Undetermined	22.1098	9.09855								TRUE	0.196691	TRUE	3	13	No Amp		0	Y	N	N	N	N	Y	Y	N	60.0006	Y		Y
368	P8	FALSE	Sample 1	Target 1	UNKNOWN	SYBR	None	Undetermined	22.1098	9.09855								TRUE	0.196691	TRUE	3	39	No Amp		0	Y	Y	N	N	N	N	N	N	60.0006	Y		N
369	P9	FALSE	Sample 1	Target 1	UNKNOWN	SYBR	None	Undetermined	22.1098	9.09855								TRUE	0.196691	TRUE	3	39	No Amp		0	Y	Y	N	N	N	N	Y	N	82.4762	Y		Y
370	P10	FALSE	Sample 1	Target 1	UNKNOWN	SYBR	None	Undetermined	22.1098	9.09855								TRUE	0.196691	TRUE	3	39	No Amp		0	Y	Y	N	N	N	N	Y	N	60.0006	Y		Y
371	P11	FALSE	Sample 1	Target 1	UNKNOWN	SYBR	None	Undetermined	22.1098	9.09855								TRUE	0.196691	TRUE	3	39	No Amp		0	Y	Y	N	N	N	N	N	N	94.542	Y		Y
372	P12	FALSE	Sample 1	Target 1	UNKNOWN	SYBR	None	13.2431	22.1098	9.09855								TRUE	0.196691	TRUE	3	7	No Amp		0	Y	N	Y	Y	Y	N	Y	N	60.0006	Y		Y
373	P13	FALSE	Sample 1	Target 1	UNKNOWN	SYBR	None	Undetermined	22.1098	9.09855								TRUE	0.196691	TRUE	3	29	No Amp		0	Y	N	N	N	N	N	Y	N	85.2118	Y		Y
374	P14	FALSE	Sample 1	Target 1	UNKNOWN	SYBR	None	Undetermined	22.1098	9.09855								TRUE	0.196691	TRUE	3	10	No Amp		0	Y	N	N	N	N	N	Y	N	70.8898	Y		Y
375	P15	FALSE	Sample 1	Target 1	UNKNOWN	SYBR	None	24.4198	22.1098	9.09855								TRUE	0.196691	TRUE	3	28	No Amp		0	Y	N	Y	N	N	N	Y	N	60.0004	Y		Y
376	P16	FALSE	Sample 1	Target 1	UNKNOWN	SYBR	None	31.6925	22.1098	9.09855								TRUE	0.196691	TRUE	3	29	No Amp		0.381359	Y	N	Y	Y	N	N	N	N	91.13	Y		Y
377	P17	FALSE	Sample 1	Target 1	UNKNOWN	SYBR	None	Undetermined	22.1098	9.09855								TRUE	0.196691	TRUE	3	23	No Amp		0	Y	N	N	N	N	Y	N	N	64.8562	Y		N
378	P18	FALSE	Sample 1	Target 1	UNKNOWN	SYBR	None	28.6347	22.1098	9.09855								TRUE	0.196691	TRUE	3	28	No Amp		0.265908	Y	N	Y	Y	Y	N	N	N	60.0005	N		N
379	P19	FALSE	Sample 1	Target 1	UNKNOWN	SYBR	None	Undetermined	22.1098	9.09855								TRUE	0.196691	TRUE	3	39	No Amp		0	Y	Y	N	N	N	Y	Y	N	60.0005	Y		Y
380	P20	FALSE	Sample 1	Target 1	UNKNOWN	SYBR	None	8.56514	22.1098	9.09855								TRUE	0.196691	TRUE	3	7	No Amp		0.527709	Y	N	Y	Y	Y	N	N	N	94.8195	Y		Y
381	P21	FALSE	Sample 1	Target 1	UNKNOWN	SYBR	None	9.14363	22.1098	9.09855								TRUE	0.196691	TRUE	3	8	No Amp		0.287734	Y	N	Y	Y	N	N	N	N	90.656	Y		N
382	P22	FALSE	Sample 1	Target 1	UNKNOWN	SYBR	None	Undetermined	22.1098	9.09855								TRUE	0.196691	TRUE	3	13	No Amp		0	Y	N	N	N	N	Y	Y	N	60.0005	Y		Y
383	P23	FALSE	Sample 1	Target 1	UNKNOWN	SYBR	None	Undetermined	22.1098	9.09855								TRUE	0.196691	TRUE	3	39	No Amp		0	Y	Y	N	N	N	N	Y	N	87.5786	Y		Y
384	P24	FALSE	Sample 1	Target 1	UNKNOWN	SYBR	None	Undetermined	22.1098	9.09855								TRUE	0.196691	TRUE	3	39	No Amp		0	Y	Y	N	N	N	N	N	N	91.2478	Y		Y

## Sheet: Melt Curve Raw Data
Block Type	384-Well Block
Calibration Background is expired	No
Calibration Background performed on	11-14-2023
Calibration Pure Dye ABY is expired	No
Calibration Pure Dye ABY performed on	11-14-2023
Calibration Pure Dye CY5 is expired	No
Calibration Pure Dye CY5 performed on	11-14-2023
Calibration Pure Dye FAM is expired	No
Calibration Pure Dye FAM performed on	11-14-2023
Calibration Pure Dye JUN is expired	No
Calibration Pure Dye JUN performed on	11-14-2023
Calibration Pure Dye MUSTANG PURPLE is expired	No
Calibration Pure Dye MUSTANG PURPLE performed on	11-14-2023
Calibration Pure Dye NED is expired	No
Calibration Pure Dye NED performed on	11-14-2023
Calibration Pure Dye ROX is expired	No
Calibration Pure Dye ROX performed on	11-14-2023
Calibration Pure Dye SYBR is expired	No
Calibration Pure Dye SYBR performed on	11-14-2023
Calibration Pure Dye TAMRA is expired	No
Calibration Pure Dye TAMRA performed on	11-14-2023
Calibration Pure Dye VIC is expired	No
Calibration Pure Dye VIC performed on	11-14-2023
Calibration ROI is expired	No
Calibration ROI performed on	11-14-2023
Calibration Uniformity is expired	No
Calibration Uniformity performed on	11-14-2023
Chemistry	SYBR_GREEN
Date Created	2023-11-14 18:09:55 PM CST
Experiment Barcode
Experiment Comment
Experiment File Name	E:\2023-1114_103838.eds
Experiment Name	2023-06-15_103838
Experiment Run End Time	2023-11-14 17:54:31 PM CST
Experiment Type	Standard Curve
Instrument Name	272530883
Instrument Serial Number	272530883
Instrument Type	QuantStudio™ 5 System
Passive Reference	ROX
Post-read Stage/Step
Pre-read Stage/Step
Quantification Cycle Method	Ct
Signal Smoothing On	true
Stage where Melt Analysis is performed	Stage3
Stage/ Cycle where Ct Analysis is performed	Stage2, Step2
User Name
Well	Well Position	Reading	Temperature	Fluorescence	Derivative	Target Name
1	A1	1	60.0006	436064	9571.48	Target 1
1	A1	2	60.2375	434117	9836.68	Target 1
1	A1	3	60.4743	432663	10069.4	Target 1
1	A1	4	60.7112	430156	10190.3	Target 1
1	A1	5	60.9481	426329	10154.1	Target 1
1	A1	6	61.1849	421910	9984.78	Target 1
1	A1	7	61.4218	419177	9774.27	Target 1
1	A1	8	61.6586	416979	9642.75	Target 1
1	A1	9	61.8955	415749	9679.96	Target 1
1	A1	10	62.1324	414272	9898.75	Target 1
1	A1	11	62.3692	410930	10231.5	Target 1
1	A1	12	62.6061	405202	10574.1	Target 1
1	A1	13	62.843	405541	10823.8	Target 1
1	A1	14	63.0798	401061	10920.5	Target 1
1	A1	15	63.3167	395915	10863.2	Target 1
1	A1	16	63.5536	393808	10701.9	Target 1
1	A1	17	63.7904	390620	10510.6	Target 1
1	A1	18	64.0273	389317	10352.2	Target 1
1	A1	19	64.2641	386946	10257.9	Target 1
1	A1	20	64.501	382314	10228.5	Target 1
1	A1	21	64.7379	379147	10252	Target 1
1	A1	22	64.9747	377848	10320.2	Target 1
1	A1	23	65.2116	375326	10431.8	Target 1
1	A1	24	65.4485	370948	10583.7	Target 1
1	A1	25	65.6853	369083	10761.3	Target 1
1	A1	26	65.9222	366759	10937.7	Target 1
1	A1	27	66.1591	361757	11081.7	Target 1
1	A1	28	66.3959	359730	11167.4	Target 1
1	A1	29	66.6328	355856	11181.5	Target 1
1	A1	30	66.8697	353156	11125.9	Target 1
1	A1	31	67.1065	350239	11017.6	Target 1
1	A1	32	67.3434	346404	10886.2	Target 1
1	A1	33	67.5802	343853	10766.8	Target 1
1	A1	34	67.8171	340288	10687.3	Target 1
1	A1	35	68.054	339702	10652.3	Target 1
1	A1	36	68.2908	336436	10639	Target 1
1	A1	37	68.5277	331409	10611.2	Target 1
1	A1	38	68.7646	329334	10546.7	Target 1
1	A1	39	69.0014	324258	10456.1	Target 1
1	A1	40	69.2383	325141	10375.1	Target 1
1	A1	41	69.4752	321654	10337	Target 1
1	A1	42	69.712	318285	10344.5	Target 1
1	A1	43	69.9489	314782	10366.7	Target 1
1	A1	44	70.1857	312510	10360.4	Target 1
1	A1	45	70.4226	309743	10301.7	Target 1
1	A1	46	70.6595	305467	10201.5	Target 1
1	A1	47	70.8963	302586	10097.9	Target 1
1	A1	48	71.1332	303990	10028.8	Target 1
1	A1	49	71.3701	298059	10006.7	Target 1
1	A1	50	71.6069	296223	10014.4	Target 1
1	A1	51	71.8438	292432	10022.8	Target 1
1	A1	52	72.0807	289561	10016.8	Target 1
1	A1	53	72.3175	287160	10006.8	Target 1
1	A1	54	72.5544	285020	10018	Target 1
1	A1	55	72.7912	282457	10067.2	Target 1
1	A1	56	73.0281	279516	10147.8	Target 1
1	A1	57	73.265	276042	10235.9	Target 1
1	A1	58	73.5018	272802	10312.6	Target 1
1	A1	59	73.7387	270325	10388	Target 1
1	A1	60	73.9756	268322	10513.5	Target 1
1	A1	61	74.2124	265195	10781.9	Target 1
1	A1	62	74.4493	261124	11324.1	Target 1
1	A1	63	74.6862	260048	12311.6	Target 1
1	A1	64	74.923	257713	13970.7	Target 1
1	A1	65	75.1599	252419	16603.5	Target 1
1	A1	66	75.3967	249278	20600.2	Target 1
1	A1	67	75.6336	244308	26406.5	Target 1
1	A1	68	75.8705	238233	34412.3	Target 1
1	A1	69	76.1073	232026	44750.9	Target 1
1	A1	70	76.3442	221275	57061.4	Target 1
1	A1	71	76.5811	203619	70326.2	Target 1
1	A1	72	76.8179	176767	82909.4	Target 1
1	A1	73	77.0548	139259	92853.7	Target 1
1	A1	74	77.2917	100868	98369.3	Target 1
1	A1	75	77.5285	67573.6	98339	Target 1
1	A1	76	77.7654	38312.3	92639.6	Target 1
1	A1	77	78.0022	16391.2	82163.5	Target 1
1	A1	78	78.2391	2525.51	68549.8	Target 1
1	A1	79	78.476	-4763.65	53745.2	Target 1
1	A1	80	78.7128	-8691.85	39550.2	Target 1
1	A1	81	78.9497	-8370.27	27281.3	Target 1
1	A1	82	79.1866	-7576.13	17615.9	Target 1
1	A1	83	79.4234	-9299.63	10626.8	Target 1
1	A1	84	79.6603	-9465.99	5906.86	Target 1
1	A1	85	79.8972	-11115.8	2952.4	Target 1
1	A1	86	80.134	-9170.72	1199.32	Target 1
1	A1	87	80.3709	-10208.4	194.569	Target 1
1	A1	88	80.6077	-10612.4	-361.01	Target 1
1	A1	89	80.8446	-9938.8	-641.521	Target 1
1	A1	90	81.0815	-9043.81	-748.44	Target 1
1	A1	91	81.3183	-10211.7	-754.93	Target 1
1	A1	92	81.5552	-10483.5	-725.945	Target 1
1	A1	93	81.7921	-9677.29	-713.629	Target 1
1	A1	94	82.0289	-11683.4	-740.565	Target 1
1	A1	95	82.2658	-11678.2	-790.412	Target 1
1	A1	96	82.5027	-10441.8	-820.812	Target 1
1	A1	97	82.7395	-8729.64	-796.4	Target 1
1	A1	98	82.9764	-9290.02	-720.511	Target 1
1	A1	99	83.2132	-12303.9	-640.098	Target 1
1	A1	100	83.4501	-11592.6	-616.564	Target 1
1	A1	101	83.687	-10937.2	-682.539	Target 1
1	A1	102	83.9238	-13354.8	-817.127	Target 1
1	A1	103	84.1607	-9636.38	-958.026	Target 1
1	A1	104	84.3976	-10804.5	-1040.03	Target 1
1	A1	105	84.6344	-9627.12	-1030.62	Target 1
1	A1	106	84.8713	-12989.7	-939.376	Target 1
1	A1	107	85.1082	-10881.1	-801.308	Target 1
1	A1	108	85.345	-11109.6	-653.318	Target 1
1	A1	109	85.5819	-10671.8	-522.63	Target 1
1	A1	110	85.8187	-12427.9	-429.862	Target 1
1	A1	111	86.0556	-11756.5	-395.137	Target 1
1	A1	112	86.2925	-12215.8	-435.51	Target 1
1	A1	113	86.5293	-12620.2	-553.333	Target 1
1	A1	114	86.7662	-13422.9	-725.547	Target 1
1	A1	115	87.0031	-12547.8	-904.917	Target 1
1	A1	116	87.2399	-11209.7	-1036.06	Target 1
1	A1	117	87.4768	-12115.1	-1078.62	Target 1
1	A1	118	87.7137	-12155.5	-1024.36	Target 1
1	A1	119	87.9505	-11407.3	-898.455	Target 1
1	A1	120	88.1874	-14233.5	-744.876	Target 1
1	A1	121	88.4243	-10473.8	-605.127	Target 1
1	A1	122	88.6611	-15025	-502.157	Target 1
1	A1	123	88.898	-12005.9	-437.137	Target 1
1	A1	124	89.1348	-13492.1	-399.099	Target 1
1	A1	125	89.3717	-12274.8	-380.081	Target 1
1	A1	126	89.6086	-14170.4	-384.889	Target 1
1	A1	127	89.8454	-14338.8	-428.013	Target 1
1	A1	128	90.0823	-14195.5	-520.099	Target 1
1	A1	129	90.3192	-13631.7	-655.167	Target 1
1	A1	130	90.556	-13952.8	-809.354	Target 1
1	A1	131	90.7929	-13457.6	-951.901	Target 1
1	A1	132	91.0298	-14913.9	-1059.59	Target 1
1	A1	133	91.2666	-12824.1	-1124.8	Target 1
1	A1	134	91.5035	-13574.1	-1153.93	Target 1
1	A1	135	91.7403	-14308.8	-1158.74	Target 1
1	A1	136	91.9772	-14027.6	-1145.87	Target 1
1	A1	137	92.2141	-13328.9	-1110.28	Target 1
1	A1	138	92.4509	-14075.4	-1038.17	Target 1
1	A1	139	92.6878	-12812.9	-920.12	Target 1
1	A1	140	92.9247	-13451.2	-766.967	Target 1
1	A1	141	93.1615	-14601.4	-614.756	Target 1
1	A1	142	93.3984	-14927.9	-510.672	Target 1
1	A1	143	93.6353	-14298.5	-485.945	Target 1
1	A1	144	93.8721	-16638	-534.264	Target 1
1	A1	145	94.109	-12377.6	-612.713	Target 1
1	A1	146	94.3458	-14871	-666.288	Target 1
1	A1	147	94.5827	-15170	-659.028	Target 1
1	A1	148	94.8196	-14701.1	-590.3	Target 1
2	A2	1	60.0006	443166	9064.04	Target 1
2	A2	2	60.2375	442493	9394.54	Target 1
2	A2	3	60.4743	439948	9716.92	Target 1
2	A2	4	60.7112	437834	9976.6	Target 1
2	A2	5	60.9481	433446	10145.4	Target 1
2	A2	6	61.1849	430985	10225.9	Target 1
2	A2	7	61.4218	428117	10265.7	Target 1
2	A2	8	61.6586	425359	10296.3	Target 1
2	A2	9	61.8955	424319	10329	Target 1
2	A2	10	62.1324	419729	10360.2	Target 1
2	A2	11	62.3692	417650	10391.6	Target 1
2	A2	12	62.6061	412887	10444.2	Target 1
2	A2	13	62.843	410000	10548.2	Target 1
2	A2	14	63.0798	410640	10714.4	Target 1
2	A2	15	63.3167	406999	10912.7	Target 1
2	A2	16	63.5536	402010	11079.4	Target 1
2	A2	17	63.7904	398903	11153.2	Target 1
2	A2	18	64.0273	395644	11112.1	Target 1
2	A2	19	64.2641	393523	10987.9	Target 1
2	A2	20	64.501	387988	10848.9	Target 1
2	A2	21	64.7379	389272	10764.4	Target 1
2	A2	22	64.9747	384073	10774.6	Target 1
2	A2	23	65.2116	382251	10877.4	Target 1
2	A2	24	65.4485	379066	11037.6	Target 1
2	A2	25	65.6853	375752	11206.9	Target 1
2	A2	26	65.9222	372536	11344.3	Target 1
2	A2	27	66.1591	369308	11425.8	Target 1
2	A2	28	66.3959	366148	11444.3	Target 1
2	A2	29	66.6328	363533	11402.6	Target 1
2	A2	30	66.8697	358983	11306.5	Target 1
2	A2	31	67.1065	357166	11161.1	Target 1
2	A2	32	67.3434	353982	10972.3	Target 1
2	A2	33	67.5802	350717	10752.1	Target 1
2	A2	34	67.8171	347144	10525.6	Target 1
2	A2	35	68.054	345652	10330	Target 1
2	A2	36	68.2908	341740	10205.7	Target 1
2	A2	37	68.5277	340933	10179	Target 1
2	A2	38	68.7646	337300	10246.4	Target 1
2	A2	39	69.0014	335455	10373.1	Target 1
2	A2	40	69.2383	330655	10506.9	Target 1
2	A2	41	69.4752	328419	10600.7	Target 1
2	A2	42	69.712	326114	10632.6	Target 1
2	A2	43	69.9489	322275	10610.9	Target 1
2	A2	44	70.1857	319682	10564.1	Target 1
2	A2	45	70.4226	316456	10520.5	Target 1
2	A2	46	70.6595	316360	10489.4	Target 1
2	A2	47	70.8963	311311	10456.1	Target 1
2	A2	48	71.1332	309156	10397.6	Target 1
2	A2	49	71.3701	303643	10306.2	Target 1
2	A2	50	71.6069	304525	10204.8	Target 1
2	A2	51	71.8438	298937	10137	Target 1
2	A2	52	72.0807	299692	10145	Target 1
2	A2	53	72.3175	295960	10234.9	Target 1
2	A2	54	72.5544	290896	10379	Target 1
2	A2	55	72.7912	289780	10532.5	Target 1
2	A2	56	73.0281	286794	10659	Target 1
2	A2	57	73.265	282568	10748.5	Target 1
2	A2	58	73.5018	280803	10818.1	Target 1
2	A2	59	73.7387	278581	10904.3	Target 1
2	A2	60	73.9756	274134	11059.7	Target 1
2	A2	61	74.2124	272553	11360.4	Target 1
2	A2	62	74.4493	268494	11922.7	Target 1
2	A2	63	74.6862	265171	12920.6	Target 1
2	A2	64	74.923	264439	14593.8	Target 1
2	A2	65	75.1599	260180	17247.6	Target 1
2	A2	66	75.3967	255943	21239.3	Target 1
2	A2	67	75.6336	250397	26941.1	Target 1
2	A2	68	75.8705	244199	34653.6	Target 1
2	A2	69	76.1073	236455	44454.5	Target 1
2	A2	70	76.3442	223779	56006.9	Target 1
2	A2	71	76.5811	210565	68412.9	Target 1
2	A2	72	76.8179	180392	80220.4	Target 1
2	A2	73	77.0548	147506	89653.7	Target 1
2	A2	74	77.2917	109142	95032.8	Target 1
2	A2	75	77.5285	74782.7	95239.5	Target 1
2	A2	76	77.7654	45534.6	90048.8	Target 1
2	A2	77	78.0022	24027.9	80199.9	Target 1
2	A2	78	78.2391	8200.89	67189.7	Target 1
2	A2	79	78.476	364.185	52880.4	Target 1
2	A2	80	78.7128	-1082.87	39058.7	Target 1
2	A2	81	78.9497	-2018.61	27079.3	Target 1
2	A2	82	79.1866	-1230.61	17676.1	Target 1
2	A2	83	79.4234	-1522.31	10962	Target 1
2	A2	84	79.6603	-3361.59	6227.07	Target 1
2	A2	85	79.8972	-2683.63	3317.3	Target 1
2	A2	86	80.134	-4508.61	1627.23	Target 1
2	A2	87	80.3709	-3868.3	607.432	Target 1
2	A2	88	80.6077	-7065.72	-87.7822	Target 1
2	A2	89	80.8446	-3836.54	-617.401	Target 1
2	A2	90	81.0815	-3439.97	-1019.24	Target 1
2	A2	91	81.3183	-4125.72	-1284.25	Target 1
2	A2	92	81.5552	-5475.67	-1409.39	Target 1
2	A2	93	81.7921	-2887.78	-1418.22	Target 1
2	A2	94	82.0289	-4828.06	-1356.12	Target 1
2	A2	95	82.2658	-4245.98	-1274.71	Target 1
2	A2	96	82.5027	-3995.99	-1215.48	Target 1
2	A2	97	82.7395	-5098.85	-1196.4	Target 1
2	A2	98	82.9764	-5384.68	-1205.25	Target 1
2	A2	99	83.2132	-5482.44	-1206.08	Target 1
2	A2	100	83.4501	-3460.86	-1161.01	Target 1
2	A2	101	83.687	-3131.36	-1057.11	Target 1
2	A2	102	83.9238	-5416.65	-919.31	Target 1
2	A2	103	84.1607	-6297.49	-797.607	Target 1
2	A2	104	84.3976	-5474.82	-737.336	Target 1
2	A2	105	84.6344	-5436.57	-754.773	Target 1
2	A2	106	84.8713	-5704.64	-834.171	Target 1
2	A2	107	85.1082	-6267.81	-943.165	Target 1
2	A2	108	85.345	-5085.99	-1050.92	Target 1
2	A2	109	85.5819	-7361.61	-1137.6	Target 1
2	A2	110	85.8187	-5464.2	-1196.01	Target 1
2	A2	111	86.0556	-5325.37	-1231.61	Target 1
2	A2	112	86.2925	-6286.13	-1262.43	Target 1
2	A2	113	86.5293	-6411.95	-1314.18	Target 1
2	A2	114	86.7662	-6302.99	-1407.43	Target 1
2	A2	115	87.0031	-6721.48	-1542.71	Target 1
2	A2	116	87.2399	-6878.23	-1694.71	Target 1
2	A2	117	87.4768	-5277.73	-1822.27	Target 1
2	A2	118	87.7137	-4975.05	-1888.41	Target 1
2	A2	119	87.9505	-6152.33	-1875.97	Target 1
2	A2	120	88.1874	-5872.77	-1789.14	Target 1
2	A2	121	88.4243	-5461.71	-1643.84	Target 1
2	A2	122	88.6611	-4002.4	-1458.68	Target 1
2	A2	123	88.898	-6708.84	-1253.82	Target 1
2	A2	124	89.1348	-5634.92	-1054.56	Target 1
2	A2	125	89.3717	-6166.9	-891.319	Target 1
2	A2	126	89.6086	-6509.35	-793.457	Target 1
2	A2	127	89.8454	-6136.17	-780.615	Target 1
2	A2	128	90.0823	-7312.82	-855.873	Target 1
2	A2	129	90.3192	-7271.38	-1001.72	Target 1
2	A2	130	90.556	-6209.91	-1179.48	Target 1
2	A2	131	90.7929	-7844.24	-1335.49	Target 1
2	A2	132	91.0298	-4743.63	-1417	Target 1
2	A2	133	91.2666	-6725.12	-1394.25	Target 1
2	A2	134	91.5035	-6792.53	-1277.77	Target 1
2	A2	135	91.7403	-6167.35	-1119.33	Target 1
2	A2	136	91.9772	-7017.23	-992.386	Target 1
2	A2	137	92.2141	-8238.28	-958.886	Target 1
2	A2	138	92.4509	-8465.57	-1038.14	Target 1
2	A2	139	92.6878	-6416.85	-1194.84	Target 1
2	A2	140	92.9247	-7561.82	-1355.67	Target 1
2	A2	141	93.1615	-6430.23	-1447.88	Target 1
2	A2	142	93.3984	-6022.42	-1438.07	Target 1
2	A2	143	93.6353	-7567.13	-1347.06	Target 1
2	A2	144	93.8721	-8969.17	-1231.82	Target 1
2	A2	145	94.109	-6461.86	-1148.41	Target 1
2	A2	146	94.3458	-8068.37	-1122.02	Target 1
2	A2	147	94.5827	-7051.81	-1142.02	Target 1
2	A2	148	94.8196	-7770.06	-1179.32	Target 1
3	A3	1	60.0006	409241	8606.34	Target 1
3	A3	2	60.2375	406958	8804.17	Target 1
3	A3	3	60.4743	404410	8992.36	Target 1
3	A3	4	60.7112	403551	9133.69	Target 1
3	A3	5	60.9481	400868	9207.42	Target 1
3	A3	6	61.1849	396192	9224.15	Target 1
3	A3	7	61.4218	396092	9225.11	Target 1
3	A3	8	61.6586	391288	9254.38	Target 1
3	A3	9	61.8955	390074	9334.92	Target 1
3	A3	10	62.1324	390504	9454.33	Target 1
3	A3	11	62.3692	384769	9575.22	Target 1
3	A3	12	62.6061	381753	9662.25	Target 1
3	A3	13	62.843	379430	9704.92	Target 1
3	A3	14	63.0798	377334	9719.22	Target 1
3	A3	15	63.3167	374634	9730.14	Target 1
3	A3	16	63.5536	372283	9751.42	Target 1
3	A3	17	63.7904	369288	9780.06	Target 1
3	A3	18	64.0273	367016	9805.76	Target 1
3	A3	19	64.2641	363479	9826.53	Target 1
3	A3	20	64.501	360710	9856.39	Target 1
3	A3	21	64.7379	359923	9919.84	Target 1
3	A3	22	64.9747	355671	10036.6	Target 1
3	A3	23	65.2116	353708	10205.4	Target 1
3	A3	24	65.4485	351003	10396.5	Target 1
3	A3	25	65.6853	349439	10556.5	Target 1
3	A3	26	65.9222	344709	10627.6	Target 1
3	A3	27	66.1591	341236	10572.1	Target 1
3	A3	28	66.3959	339034	10391.1	Target 1
3	A3	29	66.6328	336034	10126.3	Target 1
3	A3	30	66.8697	333475	9845.12	Target 1
3	A3	31	67.1065	330711	9615.39	Target 1
3	A3	32	67.3434	329649	9482.91	Target 1
3	A3	33	67.5802	326819	9459.97	Target 1
3	A3	34	67.8171	322947	9527.13	Target 1
3	A3	35	68.054	322968	9646.06	Target 1
3	A3	36	68.2908	317924	9774.45	Target 1
3	A3	37	68.5277	316183	9877.81	Target 1
3	A3	38	68.7646	313325	9935.38	Target 1
3	A3	39	69.0014	310500	9940.05	Target 1
3	A3	40	69.2383	308263	9897.08	Target 1
3	A3	41	69.4752	305278	9822.59	Target 1
3	A3	42	69.712	302044	9740.1	Target 1
3	A3	43	69.9489	299834	9671.93	Target 1
3	A3	44	70.1857	298844	9626.88	Target 1
3	A3	45	70.4226	296457	9594.14	Target 1
3	A3	46	70.6595	291557	9550.62	Target 1
3	A3	47	70.8963	289756	9479.45	Target 1
3	A3	48	71.1332	286980	9384.67	Target 1
3	A3	49	71.3701	285837	9289.35	Target 1
3	A3	50	71.6069	283552	9219.42	Target 1
3	A3	51	71.8438	280113	9186.09	Target 1
3	A3	52	72.0807	278690	9190.64	Target 1
3	A3	53	72.3175	273737	9223.59	Target 1
3	A3	54	72.5544	273708	9275.81	Target 1
3	A3	55	72.7912	271375	9344.57	Target 1
3	A3	56	73.0281	268291	9423.77	Target 1
3	A3	57	73.265	264899	9507.09	Target 1
3	A3	58	73.5018	262734	9598.69	Target 1
3	A3	59	73.7387	260290	9725.59	Target 1
3	A3	60	73.9756	258548	9944.36	Target 1
3	A3	61	74.2124	255575	10342.3	Target 1
3	A3	62	74.4493	252823	11039.7	Target 1
3	A3	63	74.6862	249193	12200.7	Target 1
3	A3	64	74.923	248678	14047.8	Target 1
3	A3	65	75.1599	243833	16874.6	Target 1
3	A3	66	75.3967	240912	21042.2	Target 1
3	A3	67	75.6336	234941	26935.7	Target 1
3	A3	68	75.8705	227875	34856.2	Target 1
3	A3	69	76.1073	222309	44842	Target 1
3	A3	70	76.3442	211146	56461.8	Target 1
3	A3	71	76.5811	192536	68684.1	Target 1
3	A3	72	76.8179	165716	79935.5	Target 1
3	A3	73	77.0548	130420	88397.9	Target 1
3	A3	74	77.2917	94915.7	92476.7	Target 1
3	A3	75	77.5285	62430.5	91267.5	Target 1
3	A3	76	77.7654	36745.4	84832	Target 1
3	A3	77	78.0022	18410.3	74176.8	Target 1
3	A3	78	78.2391	6833.52	60955.1	Target 1
3	A3	79	78.476	2290.61	47022.3	Target 1
3	A3	80	78.7128	-1263.01	34007.9	Target 1
3	A3	81	78.9497	-222.246	23028.4	Target 1
3	A3	82	79.1866	-1564.05	14590.3	Target 1
3	A3	83	79.4234	-249.052	8624.71	Target 1
3	A3	84	79.6603	-153.008	4554.52	Target 1
3	A3	85	79.8972	-1596.47	2130.25	Target 1
3	A3	86	80.134	-2100.76	761.359	Target 1
3	A3	87	80.3709	-2419.01	-11.3223	Target 1
3	A3	88	80.6077	-2164.36	-471.604	Target 1
3	A3	89	80.8446	-1209.35	-749.836	Target 1
3	A3	90	81.0815	-1491.28	-882.959	Target 1
3	A3	91	81.3183	-1764.44	-879.664	Target 1
3	A3	92	81.5552	-749.344	-764.828	Target 1
3	A3	93	81.7921	-1366.8	-592.89	Target 1
3	A3	94	82.0289	-2736.24	-434.691	Target 1
3	A3	95	82.2658	-2352.53	-351.292	Target 1
3	A3	96	82.5027	-3127.12	-370.492	Target 1
3	A3	97	82.7395	-2653	-478.357	Target 1
3	A3	98	82.9764	-3949.07	-629.903	Target 1
3	A3	99	83.2132	-1581.28	-772.881	Target 1
3	A3	100	83.4501	-2539.73	-871.125	Target 1
3	A3	101	83.687	-2501.89	-914.591	Target 1
3	A3	102	83.9238	-3650.28	-912.743	Target 1
3	A3	103	84.1607	-2988.2	-879.775	Target 1
3	A3	104	84.3976	-2336.24	-824.291	Target 1
3	A3	105	84.6344	-2049.3	-749.371	Target 1
3	A3	106	84.8713	-3996.18	-658.85	Target 1
3	A3	107	85.1082	-3521.79	-562.515	Target 1
3	A3	108	85.345	-2953.39	-477.516	Target 1
3	A3	109	85.5819	-2711.12	-427.394	Target 1
3	A3	110	85.8187	-4220.27	-438.635	Target 1
3	A3	111	86.0556	-4562.57	-532.229	Target 1
3	A3	112	86.2925	-4491.3	-710.869	Target 1
3	A3	113	86.5293	-4154.32	-948.807	Target 1
3	A3	114	86.7662	-3996.71	-1193.09	Target 1
3	A3	115	87.0031	-3722.56	-1378.85	Target 1
3	A3	116	87.2399	-3522.01	-1453.11	Target 1
3	A3	117	87.4768	-3159.91	-1396.73	Target 1
3	A3	118	87.7137	-2018.23	-1234.03	Target 1
3	A3	119	87.9505	-4469.18	-1023.72	Target 1
3	A3	120	88.1874	-4952.79	-833.361	Target 1
3	A3	121	88.4243	-2152.85	-709.646	Target 1
3	A3	122	88.6611	-5568.16	-661.276	Target 1
3	A3	123	88.898	-2752.5	-663.264	Target 1
3	A3	124	89.1348	-4489.78	-677.378	Target 1
3	A3	125	89.3717	-4379.35	-674.34	Target 1
3	A3	126	89.6086	-3075.47	-645.903	Target 1
3	A3	127	89.8454	-5351.46	-603.974	Target 1
3	A3	128	90.0823	-4306.09	-571.035	Target 1
3	A3	129	90.3192	-4535.68	-568.253	Target 1
3	A3	130	90.556	-5090.38	-606.464	Target 1
3	A3	131	90.7929	-5434.72	-683.006	Target 1
3	A3	132	91.0298	-3964.08	-784.086	Target 1
3	A3	133	91.2666	-4927.45	-889.554	Target 1
3	A3	134	91.5035	-5955.55	-977.055	Target 1
3	A3	135	91.7403	-4271.11	-1025.7	Target 1
3	A3	136	91.9772	-4229.81	-1021.67	Target 1
3	A3	137	92.2141	-4432.15	-965.088	Target 1
3	A3	138	92.4509	-4672.19	-872.147	Target 1
3	A3	139	92.6878	-6613.86	-767.281	Target 1
3	A3	140	92.9247	-4454.77	-669.375	Target 1
3	A3	141	93.1615	-4965.52	-584.375	Target 1
3	A3	142	93.3984	-4970.33	-511.631	Target 1
3	A3	143	93.6353	-5813.18	-456.592	Target 1
3	A3	144	93.8721	-6347.72	-434.312	Target 1
3	A3	145	94.109	-6417.36	-457.492	Target 1
3	A3	146	94.3458	-6472.76	-520.035	Target 1
3	A3	147	94.5827	-4005.09	-593.298	Target 1
3	A3	148	94.8196	-6386.28	-640.581	Target 1
4	A4	1	60.0006	433372	9292.93	Target 1
4	A4	2	60.2375	434185	9493.53	Target 1
4	A4	3	60.4743	431673	9692.64	Target 1
4	A4	4	60.7112	427497	9836.7	Target 1
4	A4	5	60.9481	425978	9905.98	Target 1
4	A4	6	61.1849	421967	9912.31	Target 1
4	A4	7	61.4218	419981	9893.01	Target 1
4	A4	8	61.6586	417000	9888.98	Target 1
4	A4	9	61.8955	414691	9920.1	Target 1
4	A4	10	62.1324	413068	9976.72	Target 1
4	A4	11	62.3692	410562	10032.4	Target 1
4	A4	12	62.6061	404441	10065.8	Target 1
4	A4	13	62.843	403325	10073.6	Target 1
4	A4	14	63.0798	402212	10066.4	Target 1
4	A4	15	63.3167	398179	10055.3	Target 1
4	A4	16	63.5536	394863	10043.3	Target 1
4	A4	17	63.7904	393446	10029.5	Target 1
4	A4	18	64.0273	389659	10019.5	Target 1
4	A4	19	64.2641	387038	10028	Target 1
4	A4	20	64.501	383719	10071.3	Target 1
4	A4	21	64.7379	383702	10152.9	Target 1
4	A4	22	64.9747	379915	10256.9	Target 1
4	A4	23	65.2116	375383	10354.1	Target 1
4	A4	24	65.4485	373685	10415.6	Target 1
4	A4	25	65.6853	371113	10425.1	Target 1
4	A4	26	65.9222	367739	10381.8	Target 1
4	A4	27	66.1591	365636	10297	Target 1
4	A4	28	66.3959	361834	10187.5	Target 1
4	A4	29	66.6328	358446	10069.4	Target 1
4	A4	30	66.8697	358383	9951.53	Target 1
4	A4	31	67.1065	354480	9834.26	Target 1
4	A4	32	67.3434	350941	9715.45	Target 1
4	A4	33	67.5802	349114	9600.97	Target 1
4	A4	34	67.8171	345207	9524.08	Target 1
4	A4	35	68.054	344963	9524.28	Target 1
4	A4	36	68.2908	342008	9631.59	Target 1
4	A4	37	68.5277	339319	9841.11	Target 1
4	A4	38	68.7646	336487	10113.9	Target 1
4	A4	39	69.0014	333632	10396.5	Target 1
4	A4	40	69.2383	330879	10625.3	Target 1
4	A4	41	69.4752	327449	10752.4	Target 1
4	A4	42	69.712	324209	10760.8	Target 1
4	A4	43	69.9489	320787	10667	Target 1
4	A4	44	70.1857	319557	10512.1	Target 1
4	A4	45	70.4226	314931	10342	Target 1
4	A4	46	70.6595	315094	10188	Target 1
4	A4	47	70.8963	311185	10059.8	Target 1
4	A4	48	71.1332	307225	9952.07	Target 1
4	A4	49	71.3701	305220	9859.23	Target 1
4	A4	50	71.6069	303634	9785.31	Target 1
4	A4	51	71.8438	300717	9743.37	Target 1
4	A4	52	72.0807	297758	9747.73	Target 1
4	A4	53	72.3175	294837	9806.62	Target 1
4	A4	54	72.5544	292964	9917.2	Target 1
4	A4	55	72.7912	290274	10063.5	Target 1
4	A4	56	73.0281	287455	10217.5	Target 1
4	A4	57	73.265	284470	10346.1	Target 1
4	A4	58	73.5018	281486	10428.9	Target 1
4	A4	59	73.7387	278294	10477.2	Target 1
4	A4	60	73.9756	274876	10547.7	Target 1
4	A4	61	74.2124	273931	10741.8	Target 1
4	A4	62	74.4493	271718	11198.3	Target 1
4	A4	63	74.6862	267104	12091.7	Target 1
4	A4	64	74.923	265865	13647.4	Target 1
4	A4	65	75.1599	261199	16166.8	Target 1
4	A4	66	75.3967	259020	20036.1	Target 1
4	A4	67	75.6336	254116	25685.5	Target 1
4	A4	68	75.8705	247590	33470.5	Target 1
4	A4	69	76.1073	241587	43481	Target 1
4	A4	70	76.3442	230848	55333	Target 1
4	A4	71	76.5811	214046	68041.6	Target 1
4	A4	72	76.8179	185049	80077	Target 1
4	A4	73	77.0548	150593	89641.6	Target 1
4	A4	74	77.2917	114495	95101.5	Target 1
4	A4	75	77.5285	82732	95423.1	Target 1
4	A4	76	77.7654	52756.6	90451.8	Target 1
4	A4	77	78.0022	29643.2	80941.9	Target 1
4	A4	78	78.2391	14743.6	68342.6	Target 1
4	A4	79	78.476	7539.49	54425.4	Target 1
4	A4	80	78.7128	3279.29	40876.8	Target 1
4	A4	81	78.9497	2932.39	28973.1	Target 1
4	A4	82	79.1866	1136.15	19416.1	Target 1
4	A4	83	79.4234	784.135	12346.7	Target 1
4	A4	84	79.6603	301.513	7377.86	Target 1
4	A4	85	79.8972	239.442	4099.63	Target 1
4	A4	86	80.134	-686.3	2109.92	Target 1
4	A4	87	80.3709	-1067.43	957.2	Target 1
4	A4	88	80.6077	833.624	313.25	Target 1
4	A4	89	80.8446	-937.217	-40.3389	Target 1
4	A4	90	81.0815	-417.928	-242.481	Target 1
4	A4	91	81.3183	-1380.54	-376.221	Target 1
4	A4	92	81.5552	-2226.59	-481.574	Target 1
4	A4	93	81.7921	-206.234	-566.088	Target 1
4	A4	94	82.0289	142.503	-619.686	Target 1
4	A4	95	82.2658	-2588.43	-630.652	Target 1
4	A4	96	82.5027	-613.245	-594.819	Target 1
4	A4	97	82.7395	-1104.81	-515.377	Target 1
4	A4	98	82.9764	-1561.2	-399.049	Target 1
4	A4	99	83.2132	-1485.54	-255.986	Target 1
4	A4	100	83.4501	-975.682	-104.497	Target 1
4	A4	101	83.687	-2558.95	25.0977	Target 1
4	A4	102	83.9238	-2181.62	94.3545	Target 1
4	A4	103	84.1607	-2692.96	70.2871	Target 1
4	A4	104	84.3976	-4023.64	-56.3457	Target 1
4	A4	105	84.6344	-3258.14	-258.239	Target 1
4	A4	106	84.8713	-4010.94	-474.732	Target 1
4	A4	107	85.1082	-2826.01	-634.633	Target 1
4	A4	108	85.345	-1912.01	-690.224	Target 1
4	A4	109	85.5819	-2210.46	-643.569	Target 1
4	A4	110	85.8187	-3673.14	-547.232	Target 1
4	A4	111	86.0556	-4007.3	-476.207	Target 1
4	A4	112	86.2925	-4168.51	-487.035	Target 1
4	A4	113	86.5293	-4287.9	-588.617	Target 1
4	A4	114	86.7662	-3413.6	-740.669	Target 1
4	A4	115	87.0031	-3824.84	-877.654	Target 1
4	A4	116	87.2399	-3552.52	-942.554	Target 1
4	A4	117	87.4768	-2970.6	-913.244	Target 1
4	A4	118	87.7137	-3231.74	-811.232	Target 1
4	A4	119	87.9505	-4092.98	-690.966	Target 1
4	A4	120	88.1874	-4569.33	-614.673	Target 1
4	A4	121	88.4243	-3794.73	-622.985	Target 1
4	A4	122	88.6611	-5479.73	-714.486	Target 1
4	A4	123	88.898	-3303.28	-844.721	Target 1
4	A4	124	89.1348	-3507.74	-946.277	Target 1
4	A4	125	89.3717	-3797.32	-960.533	Target 1
4	A4	126	89.6086	-3438.68	-865.363	Target 1
4	A4	127	89.8454	-3387.32	-685.488	Target 1
4	A4	128	90.0823	-4756.9	-481.119	Target 1
4	A4	129	90.3192	-4630.28	-320.774	Target 1
4	A4	130	90.556	-4710.84	-251.083	Target 1
4	A4	131	90.7929	-6420.01	-277.947	Target 1
4	A4	132	91.0298	-3966.76	-368.371	Target 1
4	A4	133	91.2666	-4552.43	-471.516	Target 1
4	A4	134	91.5035	-4812.54	-546.088	Target 1
4	A4	135	91.7403	-5855.95	-577.573	Target 1
4	A4	136	91.9772	-5052.79	-577.322	Target 1
4	A4	137	92.2141	-5214.96	-569.246	Target 1
4	A4	138	92.4509	-5408	-576.367	Target 1
4	A4	139	92.6878	-5089.26	-614.074	Target 1
4	A4	140	92.9247	-6815.68	-687.891	Target 1
4	A4	141	93.1615	-5152.33	-791.8	Target 1
4	A4	142	93.3984	-5798.47	-908.306	Target 1
4	A4	143	93.6353	-4766.12	-1014.38	Target 1
4	A4	144	93.8721	-5684	-1092.65	Target 1
4	A4	145	94.109	-4831.75	-1140.46	Target 1
4	A4	146	94.3458	-6259.41	-1169.46	Target 1
4	A4	147	94.5827	-4043.97	-1196.29	Target 1
4	A4	148	94.8196	-5621.85	-1231.98	Target 1
5	A5	1	60.0006	441199	9727.68	Target 1
5	A5	2	60.2376	439857	9943.43	Target 1
5	A5	3	60.4745	436727	10115.3	Target 1
5	A5	4	60.7115	434968	10203.6	Target 1
5	A5	5	60.9485	429249	10211	Target 1
5	A5	6	61.1855	428417	10174.9	Target 1
5	A5	7	61.4224	426456	10143.1	Target 1
5	A5	8	61.6594	423063	10144.2	Target 1
5	A5	9	61.8964	420599	10173.4	Target 1
5	A5	10	62.1333	418558	10204	Target 1
5	A5	11	62.3703	414067	10213	Target 1
5	A5	12	62.6073	411946	10201.2	Target 1
5	A5	13	62.8442	409144	10195.4	Target 1
5	A5	14	63.0812	406981	10232.1	Target 1
5	A5	15	63.3182	403364	10332.3	Target 1
5	A5	16	63.5552	402100	10483.3	Target 1
5	A5	17	63.7921	399054	10638.5	Target 1
5	A5	18	64.0291	395225	10737.2	Target 1
5	A5	19	64.2661	392414	10735.4	Target 1
5	A5	20	64.503	388000	10632	Target 1
5	A5	21	64.74	388416	10473.9	Target 1
5	A5	22	64.977	381722	10337.3	Target 1
5	A5	23	65.214	381573	10290.4	Target 1
5	A5	24	65.4509	380960	10360	Target 1
5	A5	25	65.6879	376542	10520.9	Target 1
5	A5	26	65.9249	373225	10713	Target 1
5	A5	27	66.1618	369158	10875.6	Target 1
5	A5	28	66.3988	368064	10974	Target 1
5	A5	29	66.6358	364235	11005.9	Target 1
5	A5	30	66.8728	361008	10988.2	Target 1
5	A5	31	67.1097	359309	10939.4	Target 1
5	A5	32	67.3467	354884	10870.5	Target 1
5	A5	33	67.5837	352692	10785.2	Target 1
5	A5	34	67.8206	350879	10686.3	Target 1
5	A5	35	68.0576	346557	10581.9	Target 1
5	A5	36	68.2946	343506	10486.1	Target 1
5	A5	37	68.5315	342838	10415.9	Target 1
5	A5	38	68.7685	338969	10383.3	Target 1
5	A5	39	69.0055	336168	10390.1	Target 1
5	A5	40	69.2425	333836	10427.5	Target 1
5	A5	41	69.4794	330020	10477.7	Target 1
5	A5	42	69.7164	329049	10519.4	Target 1
5	A5	43	69.9534	325147	10531.8	Target 1
5	A5	44	70.1903	322344	10501.5	Target 1
5	A5	45	70.4273	319229	10430.6	Target 1
5	A5	46	70.6643	316486	10339.1	Target 1
5	A5	47	70.9013	314951	10257.6	Target 1
5	A5	48	71.1382	311844	10212.3	Target 1
5	A5	49	71.3752	309697	10211.8	Target 1
5	A5	50	71.6122	306666	10245.6	Target 1
5	A5	51	71.8491	302656	10293.4	Target 1
5	A5	52	72.0861	301541	10336.1	Target 1
5	A5	53	72.3231	297846	10358.6	Target 1
5	A5	54	72.5601	296004	10347.1	Target 1
5	A5	55	72.797	292455	10287.4	Target 1
5	A5	56	73.034	290051	10174.2	Target 1
5	A5	57	73.271	285323	10023	Target 1
5	A5	58	73.5079	285737	9883.85	Target 1
5	A5	59	73.7449	282143	9829.49	Target 1
5	A5	60	73.9819	281086	9939.34	Target 1
5	A5	61	74.2188	276939	10288.7	Target 1
5	A5	62	74.4558	274806	10958	Target 1
5	A5	63	74.6928	271790	12074.3	Target 1
5	A5	64	74.9298	270240	13834.7	Target 1
5	A5	65	75.1667	265012	16536.1	Target 1
5	A5	66	75.4037	262698	20575.3	Target 1
5	A5	67	75.6407	257376	26406.3	Target 1
5	A5	68	75.8776	251775	34430.8	Target 1
5	A5	69	76.1146	243590	44819.4	Target 1
5	A5	70	76.3516	233841	57294.9	Target 1
5	A5	71	76.5886	214855	70968.1	Target 1
5	A5	72	76.8255	189797	84331.8	Target 1
5	A5	73	77.0625	154861	95486.2	Target 1
5	A5	74	77.2995	116485	102566	Target 1
5	A5	75	77.5364	81633.5	104237	Target 1
5	A5	76	77.7734	53744.4	100067	Target 1
5	A5	77	78.0104	29751	90652.7	Target 1
5	A5	78	78.2474	13074.2	77433.7	Target 1
5	A5	79	78.4843	6129.69	62314.8	Target 1
5	A5	80	78.7213	1509.91	47208.1	Target 1
5	A5	81	78.9583	161.84	33649.5	Target 1
5	A5	82	79.1952	-597.734	22573.7	Target 1
5	A5	83	79.4322	488.09	14276.4	Target 1
5	A5	84	79.6692	-901.734	8510.84	Target 1
5	A5	85	79.9062	-2386.91	4742.31	Target 1
5	A5	86	80.1431	-2107.17	2418.09	Target 1
5	A5	87	80.3801	-3454.81	1011.88	Target 1
5	A5	88	80.6171	-2732.47	166.988	Target 1
5	A5	89	80.854	-1381.26	-315.878	Target 1
5	A5	90	81.091	-1289.55	-544.685	Target 1
5	A5	91	81.328	-2029.08	-604.269	Target 1
5	A5	92	81.5649	-3295.54	-587.848	Target 1
5	A5	93	81.8019	-3095.17	-585.149	Target 1
5	A5	94	82.0389	-3805.25	-650.876	Target 1
5	A5	95	82.2759	-4137.34	-786.392	Target 1
5	A5	96	82.5128	-1846.97	-951.357	Target 1
5	A5	97	82.7498	-2127.52	-1095.88	Target 1
5	A5	98	82.9868	-4126.12	-1188.77	Target 1
5	A5	99	83.2237	-2784.4	-1224.41	Target 1
5	A5	100	83.4607	-3448.78	-1210.5	Target 1
5	A5	101	83.6977	-2217.3	-1153	Target 1
5	A5	102	83.9347	-3123.26	-1052.41	Target 1
5	A5	103	84.1716	-2707.39	-911.63	Target 1
5	A5	104	84.4086	-3229.64	-745.718	Target 1
5	A5	105	84.6456	-3055.23	-583.649	Target 1
5	A5	106	84.8825	-3748.75	-460.141	Target 1
5	A5	107	85.1195	-4484.1	-402.41	Target 1
5	A5	108	85.3565	-4072.87	-419.389	Target 1
5	A5	109	85.5934	-4358.41	-499.205	Target 1
5	A5	110	85.8304	-5026.01	-616.253	Target 1
5	A5	111	86.0674	-3352.15	-743.667	Target 1
5	A5	112	86.3044	-4654.98	-863.457	Target 1
5	A5	113	86.5413	-5263.22	-968.267	Target 1
5	A5	114	86.7783	-4159.09	-1055.35	Target 1
5	A5	115	87.0153	-4768.95	-1119.96	Target 1
5	A5	116	87.2522	-4446.84	-1155.86	Target 1
5	A5	117	87.4892	-3855.28	-1163.53	Target 1
5	A5	118	87.7262	-4599.57	-1157.86	Target 1
5	A5	119	87.9632	-4322.23	-1165.35	Target 1
5	A5	120	88.2001	-6223.16	-1208.51	Target 1
5	A5	121	88.4371	-3682.46	-1287.69	Target 1
5	A5	122	88.6741	-4977.83	-1375.37	Target 1
5	A5	123	88.911	-2592.46	-1429.71	Target 1
5	A5	124	89.148	-4519.66	-1418.22	Target 1
5	A5	125	89.385	-5036.73	-1334.01	Target 1
5	A5	126	89.6219	-3650.35	-1194.5	Target 1
5	A5	127	89.8589	-3813.07	-1028.06	Target 1
5	A5	128	90.0959	-5016.76	-861.384	Target 1
5	A5	129	90.3329	-4246.43	-715.214	Target 1
5	A5	130	90.5698	-5266.7	-605.742	Target 1
5	A5	131	90.8068	-5320.29	-546.012	Target 1
5	A5	132	91.0438	-4292.51	-544.928	Target 1
5	A5	133	91.2807	-6407.16	-604.599	Target 1
5	A5	134	91.5177	-5074.34	-716.954	Target 1
5	A5	135	91.7547	-6580.95	-861.035	Target 1
5	A5	136	91.9917	-4419.86	-1004.41	Target 1
5	A5	137	92.2286	-4950.35	-1111.88	Target 1
5	A5	138	92.4656	-5908.13	-1159.72	Target 1
5	A5	139	92.7026	-5369.86	-1148.12	Target 1
5	A5	140	92.9395	-4042.11	-1103.93	Target 1
5	A5	141	93.1765	-6552.7	-1070.42	Target 1
5	A5	142	93.4135	-6302.22	-1087.88	Target 1
5	A5	143	93.6505	-5390.76	-1174.29	Target 1
5	A5	144	93.8874	-5178.16	-1316.9	Target 1
5	A5	145	94.1244	-4995.51	-1480.6	Target 1
5	A5	146	94.3614	-5436	-1628.07	Target 1
5	A5	147	94.5983	-4189.39	-1738.35	Target 1
5	A5	148	94.8353	-5392.89	-1812.51	Target 1
6	A6	1	60.0006	446492	9415.34	Target 1
6	A6	2	60.2376	445209	9664.88	Target 1
6	A6	3	60.4745	442742	9876.16	Target 1
6	A6	4	60.7115	439701	9997.28	Target 1
6	A6	5	60.9485	436337	10010.7	Target 1
6	A6	6	61.1855	433566	9946.27	Target 1
6	A6	7	61.4224	430533	9859.63	Target 1
6	A6	8	61.6594	430519	9797.1	Target 1
6	A6	9	61.8964	425263	9773.48	Target 1
6	A6	10	62.1333	425758	9777.04	Target 1
6	A6	11	62.3703	419176	9792.94	Target 1
6	A6	12	62.6073	418902	9825.33	Target 1
6	A6	13	62.8442	415257	9902.55	Target 1
6	A6	14	63.0812	413556	10062.2	Target 1
6	A6	15	63.3182	410712	10321.5	Target 1
6	A6	16	63.5552	407916	10662.7	Target 1
6	A6	17	63.7921	406245	11032.2	Target 1
6	A6	18	64.0291	401310	11356.9	Target 1
6	A6	19	64.2661	398811	11569.3	Target 1
6	A6	20	64.503	395070	11629.5	Target 1
6	A6	21	64.74	392998	11538.4	Target 1
6	A6	22	64.977	388544	11337.7	Target 1
6	A6	23	65.214	385487	11099	Target 1
6	A6	24	65.4509	384225	10900.1	Target 1
6	A6	25	65.6879	381191	10794.9	Target 1
6	A6	26	65.9249	378193	10789.8	Target 1
6	A6	27	66.1618	376980	10838.8	Target 1
6	A6	28	66.3988	371832	10865.8	Target 1
6	A6	29	66.6358	369911	10804.8	Target 1
6	A6	30	66.8728	364865	10638.4	Target 1
6	A6	31	67.1097	363446	10409.9	Target 1
6	A6	32	67.3467	361260	10201.9	Target 1
6	A6	33	67.5837	359035	10092.2	Target 1
6	A6	34	67.8206	356657	10115.1	Target 1
6	A6	35	68.0576	354482	10248.1	Target 1
6	A6	36	68.2946	350392	10431.5	Target 1
6	A6	37	68.5315	347293	10601.8	Target 1
6	A6	38	68.7685	345018	10719.8	Target 1
6	A6	39	69.0055	342059	10777.9	Target 1
6	A6	40	69.2425	340279	10788.9	Target 1
6	A6	41	69.4794	334962	10771.9	Target 1
6	A6	42	69.7164	334637	10740.3	Target 1
6	A6	43	69.9534	330047	10698	Target 1
6	A6	44	70.1903	329372	10641.1	Target 1
6	A6	45	70.4273	325467	10564.9	Target 1
6	A6	46	70.6643	321279	10472.2	Target 1
6	A6	47	70.9013	319656	10380.1	Target 1
6	A6	48	71.1382	319074	10315.3	Target 1
6	A6	49	71.3752	313137	10299.1	Target 1
6	A6	50	71.6122	314077	10332.4	Target 1
6	A6	51	71.8491	308638	10392	Target 1
6	A6	52	72.0861	306127	10441	Target 1
6	A6	53	72.3231	304494	10448.3	Target 1
6	A6	54	72.5601	299282	10403.6	Target 1
6	A6	55	72.797	299433	10323	Target 1
6	A6	56	73.034	295450	10243.1	Target 1
6	A6	57	73.271	291544	10209.1	Target 1
6	A6	58	73.5079	291585	10260.7	Target 1
6	A6	59	73.7449	289164	10422.4	Target 1
6	A6	60	73.9819	283940	10706.1	Target 1
6	A6	61	74.2188	283428	11130.5	Target 1
6	A6	62	74.4558	277664	11755.4	Target 1
6	A6	63	74.6928	277121	12718.3	Target 1
6	A6	64	74.9298	273294	14260.6	Target 1
6	A6	65	75.1667	271062	16739.4	Target 1
6	A6	66	75.4037	266301	20613.6	Target 1
6	A6	67	75.6407	261420	26390.4	Target 1
6	A6	68	75.8776	257793	34507	Target 1
6	A6	69	76.1146	250021	45140.8	Target 1
6	A6	70	76.3516	237836	57988.9	Target 1
6	A6	71	76.5886	221877	72111.2	Target 1
6	A6	72	76.8255	194008	85942	Target 1
6	A6	73	77.0625	159287	97534.8	Target 1
6	A6	74	77.2995	123941	104996	Target 1
6	A6	75	77.5364	87200.7	106973	Target 1
6	A6	76	77.7734	58432.1	103019	Target 1
6	A6	77	78.0104	34964.8	93702.7	Target 1
6	A6	78	78.2474	18411.2	80439.3	Target 1
6	A6	79	78.4843	8801.27	65114.9	Target 1
6	A6	80	78.7213	4875.47	49641.4	Target 1
6	A6	81	78.9583	3486.18	35577.9	Target 1
6	A6	82	79.1952	1192.16	23907.9	Target 1
6	A6	83	79.4322	2356.62	14999.2	Target 1
6	A6	84	79.6692	2517.66	8728.31	Target 1
6	A6	85	79.9062	359.1	4663.68	Target 1
6	A6	86	80.1431	1822.45	2177.7	Target 1
6	A6	87	80.3801	1613.74	740.827	Target 1
6	A6	88	80.6171	621.567	-58.2217	Target 1
6	A6	89	80.854	501.104	-489.703	Target 1
6	A6	90	81.091	1835.7	-702.601	Target 1
6	A6	91	81.328	999.31	-765.81	Target 1
6	A6	92	81.5649	1450.27	-712.422	Target 1
6	A6	93	81.8019	1560.59	-573.144	Target 1
6	A6	94	82.0389	597.035	-390.865	Target 1
6	A6	95	82.2759	605.932	-216.646	Target 1
6	A6	96	82.5128	-562.202	-95.3174	Target 1
6	A6	97	82.7498	101.139	-52.3311	Target 1
6	A6	98	82.9868	-471.533	-90.1846	Target 1
6	A6	99	83.2237	-1308.26	-195.24	Target 1
6	A6	100	83.4607	-89.2472	-348.785	Target 1
6	A6	101	83.6977	-946.532	-534.102	Target 1
6	A6	102	83.9347	-1651.4	-735.043	Target 1
6	A6	103	84.1716	-883.159	-928.725	Target 1
6	A6	104	84.4086	-1150.96	-1080.55	Target 1
6	A6	105	84.6456	-400.096	-1149.66	Target 1
6	A6	106	84.8825	-568.146	-1105.87	Target 1
6	A6	107	85.1195	694.518	-949.855	Target 1
6	A6	108	85.3565	-801.197	-723.144	Target 1
6	A6	109	85.5934	-1490.7	-498.38	Target 1
6	A6	110	85.8304	-973.071	-351.245	Target 1
6	A6	111	86.0674	-2702.25	-327.388	Target 1
6	A6	112	86.3044	-2688.55	-422.569	Target 1
6	A6	113	86.5413	-1587.46	-588.206	Target 1
6	A6	114	86.7783	-1227.06	-759.78	Target 1
6	A6	115	87.0153	-1091.26	-890.959	Target 1
6	A6	116	87.2522	-2371.53	-971.809	Target 1
6	A6	117	87.4892	-2148.51	-1020.17	Target 1
6	A6	118	87.7262	-1830.01	-1054.28	Target 1
6	A6	119	87.9632	-2591.97	-1068.96	Target 1
6	A6	120	88.2001	-1466.05	-1035.27	Target 1
6	A6	121	88.4371	584.429	-925.988	Target 1
6	A6	122	88.6741	-3110.36	-748.055	Target 1
6	A6	123	88.911	-2154.27	-555.184	Target 1
6	A6	124	89.148	-2656.48	-426.783	Target 1
6	A6	125	89.385	-4663.85	-424.688	Target 1
6	A6	126	89.6219	-1930.56	-557.072	Target 1
6	A6	127	89.8589	-2959.84	-773.983	Target 1
6	A6	128	90.0959	-1990.95	-995.536	Target 1
6	A6	129	90.3329	-2913.92	-1151.53	Target 1
6	A6	130	90.5698	-2014.57	-1207.39	Target 1
6	A6	131	90.8068	-2542.87	-1165.8	Target 1
6	A6	132	91.0438	-2388.11	-1051.51	Target 1
6	A6	133	91.2807	-2766.01	-894.994	Target 1
6	A6	134	91.5177	-2448.04	-725.714	Target 1
6	A6	135	91.7547	-2434.94	-574.078	Target 1
6	A6	136	91.9917	-3881.21	-473.419	Target 1
6	A6	137	92.2286	-3067.39	-453.445	Target 1
6	A6	138	92.4656	-4968.9	-525.716	Target 1
6	A6	139	92.7026	-3640.18	-671.711	Target 1
6	A6	140	92.9395	-2291.39	-845.795	Target 1
6	A6	141	93.1765	-3419.96	-994.866	Target 1
6	A6	142	93.4135	-4060.32	-1082.54	Target 1
6	A6	143	93.6505	-2784.82	-1101.86	Target 1
6	A6	144	93.8874	-3642.07	-1070.77	Target 1
6	A6	145	94.1244	-3044.64	-1017.87	Target 1
6	A6	146	94.3614	-3927.82	-969.869	Target 1
6	A6	147	94.5983	-3011.44	-945.444	Target 1
6	A6	148	94.8353	-4459.38	-953.273	Target 1
7	A7	1	60.0006	470484	11923.3	Target 1
7	A7	2	60.2376	467554	12016.5	Target 1
7	A7	3	60.4745	463878	12033.3	Target 1
7	A7	4	60.7115	459422	11980.3	Target 1
7	A7	5	60.9485	457606	11904.2	Target 1
7	A7	6	61.1855	456312	11866.3	Target 1
7	A7	7	61.4224	451620	11907.4	Target 1
7	A7	8	61.6594	449313	12027.1	Target 1
7	A7	9	61.8964	447171	12188.7	Target 1
7	A7	10	62.1333	442092	12340.5	Target 1
7	A7	11	62.3703	439583	12440.4	Target 1
7	A7	12	62.6073	436058	12469.2	Target 1
7	A7	13	62.8442	433803	12435.4	Target 1
7	A7	14	63.0812	428615	12368	Target 1
7	A7	15	63.3182	425716	12302.6	Target 1
7	A7	16	63.5552	423869	12266.3	Target 1
7	A7	17	63.7921	422333	12266.9	Target 1
7	A7	18	64.0291	414938	12295.4	Target 1
7	A7	19	64.2661	414541	12337.7	Target 1
7	A7	20	64.503	410578	12384.2	Target 1
7	A7	21	64.74	407677	12431.6	Target 1
7	A7	22	64.977	404772	12474.3	Target 1
7	A7	23	65.214	401242	12499.5	Target 1
7	A7	24	65.4509	398244	12490.2	Target 1
7	A7	25	65.6879	394780	12435.4	Target 1
7	A7	26	65.9249	391398	12338.7	Target 1
7	A7	27	66.1618	387272	12216.4	Target 1
7	A7	28	66.3988	387003	12088.3	Target 1
7	A7	29	66.6358	382377	11968	Target 1
7	A7	30	66.8728	377820	11861.4	Target 1
7	A7	31	67.1097	377149	11772.1	Target 1
7	A7	32	67.3467	372578	11707.3	Target 1
7	A7	33	67.5837	370645	11675.2	Target 1
7	A7	34	67.8206	367629	11679.4	Target 1
7	A7	35	68.0576	364793	11715.4	Target 1
7	A7	36	68.2946	360922	11774	Target 1
7	A7	37	68.5315	358366	11848.7	Target 1
7	A7	38	68.7685	355022	11937.9	Target 1
7	A7	39	69.0055	353322	12040.7	Target 1
7	A7	40	69.2425	348953	12150.9	Target 1
7	A7	41	69.4794	345609	12253.7	Target 1
7	A7	42	69.7164	343140	12327.8	Target 1
7	A7	43	69.9534	339426	12351.8	Target 1
7	A7	44	70.1903	337926	12310.6	Target 1
7	A7	45	70.4273	331969	12201.2	Target 1
7	A7	46	70.6643	329567	12035.5	Target 1
7	A7	47	70.9013	328238	11837.2	Target 1
7	A7	48	71.1382	325286	11633.8	Target 1
7	A7	49	71.3752	320955	11449.3	Target 1
7	A7	50	71.6122	318519	11300.9	Target 1
7	A7	51	71.8491	315835	11203.5	Target 1
7	A7	52	72.0861	314422	11165.1	Target 1
7	A7	53	72.3231	309222	11184.8	Target 1
7	A7	54	72.5601	308509	11248.5	Target 1
7	A7	55	72.797	304239	11333.2	Target 1
7	A7	56	73.034	301686	11416.4	Target 1
7	A7	57	73.271	298228	11487.7	Target 1
7	A7	58	73.5079	295993	11554.8	Target 1
7	A7	59	73.7449	293350	11643.5	Target 1
7	A7	60	73.9819	289785	11796	Target 1
7	A7	61	74.2188	287098	12078.2	Target 1
7	A7	62	74.4558	283640	12593.9	Target 1
7	A7	63	74.6928	281121	13507.5	Target 1
7	A7	64	74.9298	278701	15066.9	Target 1
7	A7	65	75.1667	274236	17621.9	Target 1
7	A7	66	75.4037	271132	21624.8	Target 1
7	A7	67	75.6407	266238	27590.1	Target 1
7	A7	68	75.8776	260534	35986	Target 1
7	A7	69	76.1146	253023	47044.9	Target 1
7	A7	70	76.3516	240897	60528.4	Target 1
7	A7	71	76.5886	224792	75535.7	Target 1
7	A7	72	76.8255	195743	90476.1	Target 1
7	A7	73	77.0625	159466	103286	Target 1
7	A7	74	77.2995	118682	111877	Target 1
7	A7	75	77.5364	79947.1	114671	Target 1
7	A7	76	77.7734	47660.3	111046	Target 1
7	A7	77	78.0104	19759.9	101502	Target 1
7	A7	78	78.2474	2179.72	87516.8	Target 1
7	A7	79	78.4843	-7031.88	71141.5	Target 1
7	A7	80	78.7213	-13108.4	54492.7	Target 1
7	A7	81	78.9583	-13685.6	39306.3	Target 1
7	A7	82	79.1952	-14885.5	26672.2	Target 1
7	A7	83	79.4322	-17444.8	16990.3	Target 1
7	A7	84	79.6692	-15785.2	10096.3	Target 1
7	A7	85	79.9062	-16183.7	5495.08	Target 1
7	A7	86	80.1431	-16702.5	2638.64	Target 1
7	A7	87	80.3801	-16315.4	979.83	Target 1
7	A7	88	80.6171	-16330.1	89.332	Target 1
7	A7	89	80.854	-16632.3	-335.005	Target 1
7	A7	90	81.091	-15482	-492.367	Target 1
7	A7	91	81.328	-17051.4	-511.696	Target 1
7	A7	92	81.5649	-17116.5	-477.922	Target 1
7	A7	93	81.8019	-15834.7	-446.059	Target 1
7	A7	94	82.0389	-17099.7	-444.722	Target 1
7	A7	95	82.2759	-18613.1	-475.439	Target 1
7	A7	96	82.5128	-16728.3	-516.088	Target 1
7	A7	97	82.7498	-16449.1	-533.646	Target 1
7	A7	98	82.9868	-16687.4	-503.525	Target 1
7	A7	99	83.2237	-17687.4	-424.903	Target 1
7	A7	100	83.4607	-16521.9	-321.691	Target 1
7	A7	101	83.6977	-19282.9	-228.202	Target 1
7	A7	102	83.9347	-16805.4	-169.689	Target 1
7	A7	103	84.1716	-18640.5	-150.737	Target 1
7	A7	104	84.4086	-18515	-157.358	Target 1
7	A7	105	84.6456	-17797.6	-168.651	Target 1
7	A7	106	84.8825	-18190.2	-169.175	Target 1
7	A7	107	85.1195	-19280.6	-155.896	Target 1
7	A7	108	85.3565	-19448.2	-139.207	Target 1
7	A7	109	85.5934	-17836.5	-140.229	Target 1
7	A7	110	85.8304	-19281.1	-184.823	Target 1
7	A7	111	86.0674	-19984.7	-292.675	Target 1
7	A7	112	86.3044	-20999.1	-463.09	Target 1
7	A7	113	86.5413	-19431.4	-666.247	Target 1
7	A7	114	86.7783	-18695.6	-850.188	Target 1
7	A7	115	87.0153	-18843	-964.492	Target 1
7	A7	116	87.2522	-19692.4	-987.518	Target 1
7	A7	117	87.4892	-18430.9	-938.819	Target 1
7	A7	118	87.7262	-19460.5	-867.427	Target 1
7	A7	119	87.9632	-20507.7	-822.882	Target 1
7	A7	120	88.2001	-19655	-826.93	Target 1
7	A7	121	88.4371	-18534.8	-862.784	Target 1
7	A7	122	88.6741	-19383.5	-887.257	Target 1
7	A7	123	88.911	-19068.9	-856.959	Target 1
7	A7	124	89.148	-19253.2	-752.558	Target 1
7	A7	125	89.385	-19251.9	-588.82	Target 1
7	A7	126	89.6219	-19428.9	-408.011	Target 1
7	A7	127	89.8589	-19998.2	-261.802	Target 1
7	A7	128	90.0959	-21076.8	-189.604	Target 1
7	A7	129	90.3329	-20680.7	-201.741	Target 1
7	A7	130	90.5698	-19890.5	-275.634	Target 1
7	A7	131	90.8068	-20376.2	-368.434	Target 1
7	A7	132	91.0438	-19952.9	-439.724	Target 1
7	A7	133	91.2807	-21101.8	-470.309	Target 1
7	A7	134	91.5177	-20969.2	-466.262	Target 1
7	A7	135	91.7547	-20270.2	-449.251	Target 1
7	A7	136	91.9917	-21405.9	-443.224	Target 1
7	A7	137	92.2286	-20269.3	-465.888	Target 1
7	A7	138	92.4656	-22703.8	-525.373	Target 1
7	A7	139	92.7026	-20478.8	-618.188	Target 1
7	A7	140	92.9395	-20964.5	-727.383	Target 1
7	A7	141	93.1765	-21770.3	-824.235	Target 1
7	A7	142	93.4135	-20672.8	-876.738	Target 1
7	A7	143	93.6505	-19965.9	-863.439	Target 1
7	A7	144	93.8874	-21522.4	-785.981	Target 1
7	A7	145	94.1244	-21057.3	-672.008	Target 1
7	A7	146	94.3614	-22309.1	-564.285	Target 1
7	A7	147	94.5983	-20504.8	-500.604	Target 1
7	A7	148	94.8353	-22413	-496.338	Target 1
8	A8	1	60.0006	459369	9706.91	Target 1
8	A8	2	60.2376	459114	10007.1	Target 1
8	A8	3	60.4745	457109	10282.6	Target 1
8	A8	4	60.7115	452206	10471.2	Target 1
8	A8	5	60.9485	450513	10540.6	Target 1
8	A8	6	61.1855	446432	10510.8	Target 1
8	A8	7	61.4224	444468	10437.9	Target 1
8	A8	8	61.6594	441582	10395.9	Target 1
8	A8	9	61.8964	439372	10442.7	Target 1
8	A8	10	62.1333	436056	10592.5	Target 1
8	A8	11	62.3703	433902	10814.8	Target 1
8	A8	12	62.6073	432548	11051.8	Target 1
8	A8	13	62.8442	427238	11243.2	Target 1
8	A8	14	63.0812	422989	11356.3	Target 1
8	A8	15	63.3182	421351	11396.8	Target 1
8	A8	16	63.5552	419145	11394.8	Target 1
8	A8	17	63.7921	414369	11379.6	Target 1
8	A8	18	64.0291	413385	11360.5	Target 1
8	A8	19	64.2661	409638	11327.8	Target 1
8	A8	20	64.503	404945	11269.7	Target 1
8	A8	21	64.74	404085	11189.8	Target 1
8	A8	22	64.977	399527	11111.7	Target 1
8	A8	23	65.214	398178	11069.8	Target 1
8	A8	24	65.4509	394891	11090.8	Target 1
8	A8	25	65.6879	392020	11179.6	Target 1
8	A8	26	65.9249	388875	11313.3	Target 1
8	A8	27	66.1618	387245	11448.5	Target 1
8	A8	28	66.3988	382211	11536	Target 1
8	A8	29	66.6358	379181	11538.3	Target 1
8	A8	30	66.8728	375967	11442.4	Target 1
8	A8	31	67.1097	374533	11263.4	Target 1
8	A8	32	67.3467	369849	11041.3	Target 1
8	A8	33	67.5837	366991	10832.5	Target 1
8	A8	34	67.8206	365471	10696.2	Target 1
8	A8	35	68.0576	362285	10674.9	Target 1
8	A8	36	68.2946	361004	10774	Target 1
8	A8	37	68.5315	356668	10951.2	Target 1
8	A8	38	68.7685	355031	11128.2	Target 1
8	A8	39	69.0055	349969	11223.3	Target 1
8	A8	40	69.2425	347672	11192.3	Target 1
8	A8	41	69.4794	342575	11051	Target 1
8	A8	42	69.7164	342473	10866.7	Target 1
8	A8	43	69.9534	340346	10720.9	Target 1
8	A8	44	70.1903	337166	10667.1	Target 1
8	A8	45	70.4273	334038	10709	Target 1
8	A8	46	70.6643	330432	10808.2	Target 1
8	A8	47	70.9013	329626	10912.1	Target 1
8	A8	48	71.1382	324568	10980.1	Target 1
8	A8	49	71.3752	321394	10996.7	Target 1
8	A8	50	71.6122	321598	10968.2	Target 1
8	A8	51	71.8491	315348	10912.3	Target 1
8	A8	52	72.0861	314118	10848.1	Target 1
8	A8	53	72.3231	311098	10788.9	Target 1
8	A8	54	72.5601	307863	10739.8	Target 1
8	A8	55	72.797	306475	10698.1	Target 1
8	A8	56	73.034	302206	10658.6	Target 1
8	A8	57	73.271	299042	10622.6	Target 1
8	A8	58	73.5079	297508	10605.7	Target 1
8	A8	59	73.7449	295120	10641.1	Target 1
8	A8	60	73.9819	291176	10777.9	Target 1
8	A8	61	74.2188	289788	11080.9	Target 1
8	A8	62	74.4558	286104	11637.3	Target 1
8	A8	63	74.6928	282699	12572.4	Target 1
8	A8	64	74.9298	281117	14070.6	Target 1
8	A8	65	75.1667	278479	16400.4	Target 1
8	A8	66	75.4037	271837	19930.1	Target 1
8	A8	67	75.6407	268031	25112.6	Target 1
8	A8	68	75.8776	263539	32401.6	Target 1
8	A8	69	76.1146	256150	42077.2	Target 1
8	A8	70	76.3516	246633	54009.6	Target 1
8	A8	71	76.5886	231276	67451.6	Target 1
8	A8	72	76.8255	204739	80986.9	Target 1
8	A8	73	77.0625	171730	92722.6	Target 1
8	A8	74	77.2995	132550	100711	Target 1
8	A8	75	77.5364	95876.8	103464	Target 1
8	A8	76	77.7734	66301.1	100380	Target 1
8	A8	77	78.0104	41356.3	91896.2	Target 1
8	A8	78	78.2474	22920.7	79354.9	Target 1
8	A8	79	78.4843	15903.5	64622.1	Target 1
8	A8	80	78.7213	9396.37	49624	Target 1
8	A8	81	78.9583	7958.99	35944	Target 1
8	A8	82	79.1952	7270.91	24583.7	Target 1
8	A8	83	79.4322	6845.82	15919.1	Target 1
8	A8	84	79.6692	5859.29	9796.52	Target 1
8	A8	85	79.9062	5704.87	5697.83	Target 1
8	A8	86	80.1431	4869.49	3207.97	Target 1
8	A8	87	80.3801	5587.72	1801.71	Target 1
8	A8	88	80.6171	4313.59	1070.87	Target 1
8	A8	89	80.854	5215.58	735.733	Target 1
8	A8	90	81.091	3690.68	623.172	Target 1
8	A8	91	81.328	3698.53	637.471	Target 1
8	A8	92	81.5649	2648.51	734.91	Target 1
8	A8	93	81.8019	3792.77	900.539	Target 1
8	A8	94	82.0389	2878.43	1123.62	Target 1
8	A8	95	82.2759	1186.89	1374.49	Target 1
8	A8	96	82.5128	2163.33	1592.47	Target 1
8	A8	97	82.7498	527.537	1694.3	Target 1
8	A8	98	82.9868	-1724.6	1604.22	Target 1
8	A8	99	83.2237	-2275.53	1293.35	Target 1
8	A8	100	83.4607	-2877.37	806.503	Target 1
8	A8	101	83.6977	-1526.4	256.292	Target 1
8	A8	102	83.9347	-935.441	-218.528	Target 1
8	A8	103	84.1716	-909.536	-511.438	Target 1
8	A8	104	84.4086	-72.5645	-591.508	Target 1
8	A8	105	84.6456	-1690.94	-508.432	Target 1
8	A8	106	84.8825	-2859.47	-359.608	Target 1
8	A8	107	85.1195	-1747.58	-241.609	Target 1
8	A8	108	85.3565	-2318.3	-213.368	Target 1
8	A8	109	85.5934	-2972.41	-285.753	Target 1
8	A8	110	85.8304	-2895.52	-433.789	Target 1
8	A8	111	86.0674	-2493.31	-617.354	Target 1
8	A8	112	86.3044	-2513.97	-797.438	Target 1
8	A8	113	86.5413	-2549.51	-943.171	Target 1
8	A8	114	86.7783	-2984.47	-1032.66	Target 1
8	A8	115	87.0153	-2627.67	-1053.85	Target 1
8	A8	116	87.2522	-1361.82	-1008.95	Target 1
8	A8	117	87.4892	-1664.17	-919.409	Target 1
8	A8	118	87.7262	-3623.21	-823.486	Target 1
8	A8	119	87.9632	-2538.48	-762.023	Target 1
8	A8	120	88.2001	-3462.91	-757.705	Target 1
8	A8	121	88.4371	-2439.76	-801.062	Target 1
8	A8	122	88.6741	-2958.6	-853.68	Target 1
8	A8	123	88.911	-1980.11	-867.886	Target 1
8	A8	124	89.148	-3257.44	-811.983	Target 1
8	A8	125	89.385	-2120.62	-687.604	Target 1
8	A8	126	89.6219	-2440.56	-530.707	Target 1
8	A8	127	89.8589	-4556.91	-395.678	Target 1
8	A8	128	90.0959	-4237.81	-330.296	Target 1
8	A8	129	90.3329	-3316.48	-354.73	Target 1
8	A8	130	90.5698	-3038.79	-455.62	Target 1
8	A8	131	90.8068	-4996.96	-596.243	Target 1
8	A8	132	91.0438	-3420.97	-733.125	Target 1
8	A8	133	91.2807	-3592.5	-828.362	Target 1
8	A8	134	91.5177	-4305.72	-855.459	Target 1
8	A8	135	91.7547	-2489.59	-803.851	Target 1
8	A8	136	91.9917	-4379.33	-684.894	Target 1
8	A8	137	92.2286	-3079.78	-533.826	Target 1
8	A8	138	92.4656	-5712.92	-399.871	Target 1
8	A8	139	92.7026	-4781.89	-325.273	Target 1
8	A8	140	92.9395	-4969.49	-325.974	Target 1
8	A8	141	93.1765	-3844.32	-388.478	Target 1
8	A8	142	93.4135	-5580.68	-485.371	Target 1
8	A8	143	93.6505	-4792.81	-596.254	Target 1
8	A8	144	93.8874	-5150.86	-716.848	Target 1
8	A8	145	94.1244	-5714.38	-850.672	Target 1
8	A8	146	94.3614	-5012.36	-993.755	Target 1
8	A8	147	94.5983	-4361.6	-1128.09	Target 1
8	A8	148	94.8353	-3695.12	-1230.12	Target 1
9	A9	1	60.0006	436722	9003.56	Target 1
9	A9	2	60.2372	434376	9326.22	Target 1
9	A9	3	60.4738	432788	9679.31	Target 1
9	A9	4	60.7104	431926	9986.86	Target 1
9	A9	5	60.9469	427356	10148.1	Target 1
9	A9	6	61.1835	422869	10121.9	Target 1
9	A9	7	61.4201	422173	9931.71	Target 1
9	A9	8	61.6567	417814	9664.35	Target 1
9	A9	9	61.8933	414846	9450.75	Target 1
9	A9	10	62.1299	413433	9394.96	Target 1
9	A9	11	62.3665	411607	9544.49	Target 1
9	A9	12	62.603	408705	9909.12	Target 1
9	A9	13	62.8396	407792	10375	Target 1
9	A9	14	63.0762	402726	10796.2	Target 1
9	A9	15	63.3128	400324	11039.4	Target 1
9	A9	16	63.5494	395835	11037.9	Target 1
9	A9	17	63.786	391158	10815.9	Target 1
9	A9	18	64.0225	390827	10472.9	Target 1
9	A9	19	64.2591	386749	10137	Target 1
9	A9	20	64.4957	384643	9911.42	Target 1
9	A9	21	64.7323	383969	9839.93	Target 1
9	A9	22	64.9689	379269	9903.74	Target 1
9	A9	23	65.2055	377795	10045.8	Target 1
9	A9	24	65.4421	374498	10205	Target 1
9	A9	25	65.6786	370873	10341.1	Target 1
9	A9	26	65.9152	368376	10439.7	Target 1
9	A9	27	66.1518	366217	10500.9	Target 1
9	A9	28	66.3884	363579	10525.3	Target 1
9	A9	29	66.625	359177	10508.3	Target 1
9	A9	30	66.8616	356776	10444.5	Target 1
9	A9	31	67.0982	353900	10332.4	Target 1
9	A9	32	67.3347	351488	10177	Target 1
9	A9	33	67.5713	349472	9992.66	Target 1
9	A9	34	67.8079	344851	9805.48	Target 1
9	A9	35	68.0445	342505	9656.4	Target 1
9	A9	36	68.2811	341054	9591.34	Target 1
9	A9	37	68.5177	338524	9639.66	Target 1
9	A9	38	68.7542	336613	9791.51	Target 1
9	A9	39	68.9908	333591	9993.34	Target 1
9	A9	40	69.2274	329565	10167.5	Target 1
9	A9	41	69.464	326928	10247	Target 1
9	A9	42	69.7006	323863	10203.2	Target 1
9	A9	43	69.9372	321920	10053.7	Target 1
9	A9	44	70.1738	318334	9849.78	Target 1
9	A9	45	70.4103	316117	9655.17	Target 1
9	A9	46	70.6469	314459	9526.86	Target 1
9	A9	47	70.8835	311163	9497.52	Target 1
9	A9	48	71.1201	309007	9562.84	Target 1
9	A9	49	71.3567	306695	9705.32	Target 1
9	A9	50	71.5933	304561	9868.83	Target 1
9	A9	51	71.8298	300270	9994.37	Target 1
9	A9	52	72.0664	297683	10038.1	Target 1
9	A9	53	72.303	295225	9989.78	Target 1
9	A9	54	72.5396	291048	9876.6	Target 1
9	A9	55	72.7762	290432	9750.36	Target 1
9	A9	56	73.0128	287854	9665.01	Target 1
9	A9	57	73.2494	283911	9657.47	Target 1
9	A9	58	73.4859	283094	9741.03	Target 1
9	A9	59	73.7225	279076	9912.88	Target 1
9	A9	60	73.9591	277812	10171.7	Target 1
9	A9	61	74.1957	273342	10539.9	Target 1
9	A9	62	74.4323	271359	11085.7	Target 1
9	A9	63	74.6689	268221	11947.5	Target 1
9	A9	64	74.9055	266442	13358.3	Target 1
9	A9	65	75.142	261897	15667.4	Target 1
9	A9	66	75.3786	258750	19342	Target 1
9	A9	67	75.6152	255849	24918.3	Target 1
9	A9	68	75.8518	250876	32875.3	Target 1
9	A9	69	76.0884	245214	43428.4	Target 1
9	A9	70	76.325	235285	56291.7	Target 1
9	A9	71	76.5616	223068	70511.9	Target 1
9	A9	72	76.7981	197627	84482.6	Target 1
9	A9	73	77.0347	165829	96200.9	Target 1
9	A9	74	77.2713	128547	103720	Target 1
9	A9	75	77.5079	94239.9	105653	Target 1
9	A9	76	77.7445	62224.6	101551	Target 1
9	A9	77	77.9811	36114.4	92013.6	Target 1
9	A9	78	78.2177	17521.2	78519.5	Target 1
9	A9	79	78.4542	7197.21	63037.3	Target 1
9	A9	80	78.6908	1952.54	47555.1	Target 1
9	A9	81	78.9274	1173.27	33670.6	Target 1
9	A9	82	79.164	-579.243	22345.6	Target 1
9	A9	83	79.4006	-328.18	13869.3	Target 1
9	A9	84	79.6372	-996.796	8118.87	Target 1
9	A9	85	79.8737	-2224.6	4605.74	Target 1
9	A9	86	80.1103	-3251.57	2424.99	Target 1
9	A9	87	80.3469	-1434.31	1097.13	Target 1
9	A9	88	80.5835	-3010.55	289.003	Target 1
9	A9	89	80.8201	-2666.59	-196.528	Target 1
9	A9	90	81.0567	-1868.09	-467.344	Target 1
9	A9	91	81.2933	-2215.68	-591.885	Target 1
9	A9	92	81.5298	-1100.28	-629.881	Target 1
9	A9	93	81.7664	-3075.16	-637.101	Target 1
9	A9	94	82.003	-2713.4	-651.638	Target 1
9	A9	95	82.2396	-2778.19	-679.096	Target 1
9	A9	96	82.4762	-3439.92	-693.584	Target 1
9	A9	97	82.7128	-718.252	-659.05	Target 1
9	A9	98	82.9494	-2162.85	-558.756	Target 1
9	A9	99	83.1859	-2011.22	-412.798	Target 1
9	A9	100	83.4225	-2691.76	-271.248	Target 1
9	A9	101	83.6591	-3063.9	-187.688	Target 1
9	A9	102	83.8957	-3587.74	-190.956	Target 1
9	A9	103	84.1323	-3813.94	-272.289	Target 1
9	A9	104	84.3689	-2838.36	-393.202	Target 1
9	A9	105	84.6054	-3325.55	-506.298	Target 1
9	A9	106	84.842	-3342.48	-575.958	Target 1
9	A9	107	85.0786	-3125.43	-589.702	Target 1
9	A9	108	85.3152	-3410.02	-558.456	Target 1
9	A9	109	85.5518	-2760.08	-508.789	Target 1
9	A9	110	85.7884	-3645.95	-471.004	Target 1
9	A9	111	86.025	-4131.89	-466.646	Target 1
9	A9	112	86.2615	-3844.25	-499.683	Target 1
9	A9	113	86.4981	-3790.94	-555.755	Target 1
9	A9	114	86.7347	-3626.33	-610.939	Target 1
9	A9	115	86.9713	-4103.81	-645.872	Target 1
9	A9	116	87.2079	-3212.63	-656.857	Target 1
9	A9	117	87.4445	-3011.98	-656.487	Target 1
9	A9	118	87.6811	-4929.62	-662.561	Target 1
9	A9	119	87.9176	-3849.39	-682.127	Target 1
9	A9	120	88.1542	-3443.13	-701.581	Target 1
9	A9	121	88.3908	-4316.73	-690.747	Target 1
9	A9	122	88.6274	-3797.86	-620.261	Target 1
9	A9	123	88.864	-2495.76	-482.501	Target 1
9	A9	124	89.1006	-3886.73	-302.813	Target 1
9	A9	125	89.3371	-5013.25	-132.597	Target 1
9	A9	126	89.5737	-4776.45	-26.9785	Target 1
9	A9	127	89.8103	-4819.14	-19.9648	Target 1
9	A9	128	90.0469	-5705.43	-111.176	Target 1
9	A9	129	90.2835	-4491.82	-269.673	Target 1
9	A9	130	90.5201	-5865.21	-449.423	Target 1
9	A9	131	90.7567	-4584.51	-606.571	Target 1
9	A9	132	90.9932	-5321.37	-711.853	Target 1
9	A9	133	91.2298	-4584.61	-756.378	Target 1
9	A9	134	91.4664	-4510.39	-750.85	Target 1
9	A9	135	91.703	-5260.95	-718.481	Target 1
9	A9	136	91.9396	-5588.41	-683.92	Target 1
9	A9	137	92.1762	-4802.5	-663.441	Target 1
9	A9	138	92.4128	-5189.11	-661.311	Target 1
9	A9	139	92.6493	-4221.21	-672.395	Target 1
9	A9	140	92.8859	-6684.12	-686.812	Target 1
9	A9	141	93.1225	-4379.73	-693.581	Target 1
9	A9	142	93.3591	-5138.8	-684.223	Target 1
9	A9	143	93.5957	-4948.53	-657.68	Target 1
9	A9	144	93.8323	-4842.91	-623.619	Target 1
9	A9	145	94.0688	-5816.71	-599.013	Target 1
9	A9	146	94.3054	-5606.91	-597.809	Target 1
9	A9	147	94.542	-5763.92	-621.016	Target 1
9	A9	148	94.7786	-4560.63	-655.749	Target 1
10	A10	1	60.0006	460571	11245.4	Target 1
10	A10	2	60.2372	458111	11407.2	Target 1
10	A10	3	60.4738	458024	11580.6	Target 1
10	A10	4	60.7104	454695	11680.3	Target 1
10	A10	5	60.9469	449204	11640.6	Target 1
10	A10	6	61.1835	447443	11452.5	Target 1
10	A10	7	61.4201	443215	11173.4	Target 1
10	A10	8	61.6567	440031	10901.7	Target 1
10	A10	9	61.8933	437768	10727.2	Target 1
10	A10	10	62.1299	437111	10688.9	Target 1
10	A10	11	62.3665	433168	10761	Target 1
10	A10	12	62.603	429713	10874.9	Target 1
10	A10	13	62.8396	427270	10958.4	Target 1
10	A10	14	63.0762	422991	10970.7	Target 1
10	A10	15	63.3128	421113	10915	Target 1
10	A10	16	63.5494	416878	10828.9	Target 1
10	A10	17	63.786	415616	10759.9	Target 1
10	A10	18	64.0225	411881	10742.4	Target 1
10	A10	19	64.2591	409493	10782.4	Target 1
10	A10	20	64.4957	406602	10858.7	Target 1
10	A10	21	64.7323	404866	10937.1	Target 1
10	A10	22	64.9689	399761	10990.6	Target 1
10	A10	23	65.2055	396798	11013.8	Target 1
10	A10	24	65.4421	395366	11021	Target 1
10	A10	25	65.6786	392290	11029.6	Target 1
10	A10	26	65.9152	389026	11040.3	Target 1
10	A10	27	66.1518	385595	11031.7	Target 1
10	A10	28	66.3884	384979	10972.6	Target 1
10	A10	29	66.625	378658	10846.5	Target 1
10	A10	30	66.8616	375386	10669	Target 1
10	A10	31	67.0982	375103	10484.6	Target 1
10	A10	32	67.3347	372212	10343.3	Target 1
10	A10	33	67.5713	369542	10274	Target 1
10	A10	34	67.8079	364968	10271.7	Target 1
10	A10	35	68.0445	364862	10303.5	Target 1
10	A10	36	68.2811	360983	10329.6	Target 1
10	A10	37	68.5177	357471	10325.4	Target 1
10	A10	38	68.7542	355208	10294.4	Target 1
10	A10	39	68.9908	351226	10265	Target 1
10	A10	40	69.2274	350504	10269.9	Target 1
10	A10	41	69.464	348468	10322.5	Target 1
10	A10	42	69.7006	344143	10405	Target 1
10	A10	43	69.9372	341461	10479.6	Target 1
10	A10	44	70.1738	339146	10512.6	Target 1
10	A10	45	70.4103	334659	10495.8	Target 1
10	A10	46	70.6469	333560	10445.7	Target 1
10	A10	47	70.8835	330875	10385.5	Target 1
10	A10	48	71.1201	328396	10324.8	Target 1
10	A10	49	71.3567	325657	10256.3	Target 1
10	A10	50	71.5933	321070	10169.4	Target 1
10	A10	51	71.8298	319235	10070.7	Target 1
10	A10	52	72.0664	317888	9978.76	Target 1
10	A10	53	72.303	314278	9920.96	Target 1
10	A10	54	72.5396	311624	9914.41	Target 1
10	A10	55	72.7762	309256	9955.14	Target 1
10	A10	56	73.0128	307184	10020.6	Target 1
10	A10	57	73.2494	303604	10083.7	Target 1
10	A10	58	73.4859	300919	10133.3	Target 1
10	A10	59	73.7225	298803	10192.7	Target 1
10	A10	60	73.9591	294404	10328.5	Target 1
10	A10	61	74.1957	293776	10646.8	Target 1
10	A10	62	74.4323	291404	11285.9	Target 1
10	A10	63	74.6689	288144	12416.3	Target 1
10	A10	64	74.9055	284989	14262.1	Target 1
10	A10	65	75.142	281770	17135	Target 1
10	A10	66	75.3786	277815	21455.5	Target 1
10	A10	67	75.6152	274065	27717.4	Target 1
10	A10	68	75.8518	268022	36365.8	Target 1
10	A10	69	76.0884	261590	47589.5	Target 1
10	A10	70	76.325	252418	61084.9	Target 1
10	A10	71	76.5616	235403	75890.9	Target 1
10	A10	72	76.7981	211165	90402.7	Target 1
10	A10	73	77.0347	178116	102620	Target 1
10	A10	74	77.2713	140364	110584	Target 1
10	A10	75	77.5079	103534	112873	Target 1
10	A10	76	77.7445	71133.1	108973	Target 1
10	A10	77	77.9811	41987.5	99417	Target 1
10	A10	78	78.2177	21844.2	85629.9	Target 1
10	A10	79	78.4542	10902.5	69564.8	Target 1
10	A10	80	78.6908	2596.44	53237.7	Target 1
10	A10	81	78.9274	2444.98	38313.7	Target 1
10	A10	82	79.164	-1101.45	25850.8	Target 1
10	A10	83	79.4006	-737.094	16247.5	Target 1
10	A10	84	79.6372	-1701.17	9393.2	Target 1
10	A10	85	79.8737	-1832.88	4934.46	Target 1
10	A10	86	80.1103	-1626.41	2083.01	Target 1
10	A10	87	80.3469	-1181.7	320.849	Target 1
10	A10	88	80.5835	-1477.43	-747.704	Target 1
10	A10	89	80.8201	-2196.44	-1375.47	Target 1
10	A10	90	81.0567	-1648.96	-1694.58	Target 1
10	A10	91	81.2933	667.674	-1764.58	Target 1
10	A10	92	81.5298	585.41	-1627.26	Target 1
10	A10	93	81.7664	88.6317	-1345.63	Target 1
10	A10	94	82.003	-92.6646	-1010.93	Target 1
10	A10	95	82.2396	-1010.1	-719.317	Target 1
10	A10	96	82.4762	-1603.83	-537.834	Target 1
10	A10	97	82.7128	-1291.22	-482.672	Target 1
10	A10	98	82.9494	-902.878	-521.457	Target 1
10	A10	99	83.1859	-1974.07	-595.503	Target 1
10	A10	100	83.4225	-1971.45	-649.536	Target 1
10	A10	101	83.6591	-629.444	-656.222	Target 1
10	A10	102	83.8957	-882.986	-626.017	Target 1
10	A10	103	84.1323	-1994.39	-597.333	Target 1
10	A10	104	84.3689	-2263.73	-610.241	Target 1
10	A10	105	84.6054	-3145.69	-677.904	Target 1
10	A10	106	84.842	-2464.45	-774.877	Target 1
10	A10	107	85.0786	-2434.9	-852.097	Target 1
10	A10	108	85.3152	-726.394	-868.74	Target 1
10	A10	109	85.5518	-1663.15	-817.117	Target 1
10	A10	110	85.7884	-2482.95	-722.465	Target 1
10	A10	111	86.025	-4374.4	-620.689	Target 1
10	A10	112	86.2615	-1860.96	-534.642	Target 1
10	A10	113	86.4981	-1833.63	-467.442	Target 1
10	A10	114	86.7347	-3544.62	-413.638	Target 1
10	A10	115	86.9713	-3480.2	-373.914	Target 1
10	A10	116	87.2079	-3217.83	-359.548	Target 1
10	A10	117	87.4445	-3049.56	-384.365	Target 1
10	A10	118	87.6811	-4837.68	-452.297	Target 1
10	A10	119	87.9176	-4009.01	-550.494	Target 1
10	A10	120	88.1542	-4113.03	-653.157	Target 1
10	A10	121	88.3908	-3292.05	-734.154	Target 1
10	A10	122	88.6274	-4784.82	-780.664	Target 1
10	A10	123	88.864	-4078.31	-798.993	Target 1
10	A10	124	89.1006	-4031.34	-808.395	Target 1
10	A10	125	89.3371	-4631.64	-826.569	Target 1
10	A10	126	89.5737	-5296.5	-856.325	Target 1
10	A10	127	89.8103	-4249.84	-882.589	Target 1
10	A10	128	90.0469	-4187.33	-882.545	Target 1
10	A10	129	90.2835	-3914.46	-842.452	Target 1
10	A10	130	90.5201	-5160.85	-769.429	Target 1
10	A10	131	90.7567	-5131.83	-689.692	Target 1
10	A10	132	90.9932	-4197.41	-634.393	Target 1
10	A10	133	91.2298	-6008.76	-622.512	Target 1
10	A10	134	91.4664	-5480.21	-651.351	Target 1
10	A10	135	91.703	-5244.98	-699.392	Target 1
10	A10	136	91.9396	-5214.38	-738.747	Target 1
10	A10	137	92.1762	-4905.69	-749.347	Target 1
10	A10	138	92.4128	-6200.51	-727.183	Target 1
10	A10	139	92.6493	-5667.28	-683.741	Target 1
10	A10	140	92.8859	-5381.6	-639.392	Target 1
10	A10	141	93.1225	-5967.33	-615.124	Target 1
10	A10	142	93.3591	-6291.25	-625.013	Target 1
10	A10	143	93.5957	-7126.49	-670.497	Target 1
10	A10	144	93.8323	-5675.86	-738.95	Target 1
10	A10	145	94.0688	-6631.93	-809.246	Target 1
10	A10	146	94.3054	-5670.48	-862.633	Target 1
10	A10	147	94.542	-7258.05	-891.986	Target 1
10	A10	148	94.7786	-6156.77	-903.04	Target 1
11	A11	1	60.0006	432596	10173.2	Target 1
11	A11	2	60.2372	430523	10181.6	Target 1
11	A11	3	60.4738	427368	10194.7	Target 1
11	A11	4	60.7104	425503	10206.5	Target 1
11	A11	5	60.9469	423205	10213.9	Target 1
11	A11	6	61.1835	420117	10213.9	Target 1
11	A11	7	61.4201	418430	10203.6	Target 1
11	A11	8	61.6567	414438	10182.6	Target 1
11	A11	9	61.8933	411417	10156.4	Target 1
11	A11	10	62.1299	409458	10131.6	Target 1
11	A11	11	62.3665	407558	10109.7	Target 1
11	A11	12	62.603	403390	10081.9	Target 1
11	A11	13	62.8396	401726	10032.8	Target 1
11	A11	14	63.0762	398801	9952.97	Target 1
11	A11	15	63.3128	395217	9851.22	Target 1
11	A11	16	63.5494	392895	9751.16	Target 1
11	A11	17	63.786	390073	9692.51	Target 1
11	A11	18	64.0225	389764	9699.69	Target 1
11	A11	19	64.2591	385222	9770.72	Target 1
11	A11	20	64.4957	383405	9877.36	Target 1
11	A11	21	64.7323	380526	9983.4	Target 1
11	A11	22	64.9689	377877	10066.2	Target 1
11	A11	23	65.2055	375249	10115.3	Target 1
11	A11	24	65.4421	371414	10133.2	Target 1
11	A11	25	65.6786	370597	10127.3	Target 1
11	A11	26	65.9152	367959	10104.2	Target 1
11	A11	27	66.1518	363839	10071.4	Target 1
11	A11	28	66.3884	360422	10040.8	Target 1
11	A11	29	66.625	360123	10027.1	Target 1
11	A11	30	66.8616	356587	10038.1	Target 1
11	A11	31	67.0982	353918	10066.3	Target 1
11	A11	32	67.3347	351669	10089.2	Target 1
11	A11	33	67.5713	347830	10082.2	Target 1
11	A11	34	67.8079	345566	10033.8	Target 1
11	A11	35	68.0445	343085	9953.19	Target 1
11	A11	36	68.2811	340805	9866.81	Target 1
11	A11	37	68.5177	337705	9804.71	Target 1
11	A11	38	68.7542	334783	9792.34	Target 1
11	A11	39	68.9908	334708	9838.88	Target 1
11	A11	40	69.2274	330169	9930.52	Target 1
11	A11	41	69.464	326697	10048.4	Target 1
11	A11	42	69.7006	325364	10164.4	Target 1
11	A11	43	69.9372	323115	10246.3	Target 1
11	A11	44	70.1738	320163	10265.7	Target 1
11	A11	45	70.4103	317174	10211.5	Target 1
11	A11	46	70.6469	311852	10104.2	Target 1
11	A11	47	70.8835	311134	9993.3	Target 1
11	A11	48	71.1201	310884	9932.37	Target 1
11	A11	49	71.3567	307579	9945.63	Target 1
11	A11	50	71.5933	304603	10012	Target 1
11	A11	51	71.8298	300676	10081.2	Target 1
11	A11	52	72.0664	298450	10110.1	Target 1
11	A11	53	72.303	295209	10090.3	Target 1
11	A11	54	72.5396	293770	10048.8	Target 1
11	A11	55	72.7762	290829	10025.4	Target 1
11	A11	56	73.0128	288712	10047.1	Target 1
11	A11	57	73.2494	285459	10118.3	Target 1
11	A11	58	73.4859	283445	10230.2	Target 1
11	A11	59	73.7225	279605	10378.4	Target 1
11	A11	60	73.9591	277548	10580.9	Target 1
11	A11	61	74.1957	275771	10889.2	Target 1
11	A11	62	74.4323	271861	11398.5	Target 1
11	A11	63	74.6689	268464	12262.6	Target 1
11	A11	64	74.9055	267232	13709.7	Target 1
11	A11	65	75.142	263325	16053.6	Target 1
11	A11	66	75.3786	260426	19681.1	Target 1
11	A11	67	75.6152	256673	24998.4	Target 1
11	A11	68	75.8518	249933	32318.9	Target 1
11	A11	69	76.0884	244610	41692.5	Target 1
11	A11	70	76.325	235152	52718	Target 1
11	A11	71	76.5616	219288	64426.1	Target 1
11	A11	72	76.7981	197018	75332.1	Target 1
11	A11	73	77.0347	165401	83711.2	Target 1
11	A11	74	77.2713	130258	88038.7	Target 1
11	A11	75	77.5079	98505.5	87441.5	Target 1
11	A11	76	77.7445	73581.3	81971.8	Target 1
11	A11	77	77.9811	54494.2	72588.7	Target 1
11	A11	78	78.2177	42900.7	60863.1	Target 1
11	A11	79	78.4542	35850.5	48534.6	Target 1
11	A11	80	78.6908	31787.1	37093.9	Target 1
11	A11	81	78.9274	29308.5	27516.9	Target 1
11	A11	82	79.164	27568.5	20196.2	Target 1
11	A11	83	79.4006	24968.3	15037	Target 1
11	A11	84	79.6372	23272.1	11639.8	Target 1
11	A11	85	79.8737	20221.8	9474.47	Target 1
11	A11	86	80.1103	19060.5	8029.65	Target 1
11	A11	87	80.3469	16663	7028.27	Target 1
11	A11	88	80.5835	14602.9	6251.41	Target 1
11	A11	89	80.8201	13424.5	5610.65	Target 1
11	A11	90	81.0567	12633.4	5097.01	Target 1
11	A11	91	81.2933	12460.8	4722.24	Target 1
11	A11	92	81.5298	11190.4	4473.73	Target 1
11	A11	93	81.7664	9004.83	4298.69	Target 1
11	A11	94	82.003	7680.98	4119.82	Target 1
11	A11	95	82.2396	6348.15	3869.13	Target 1
11	A11	96	82.4762	5320.82	3518.94	Target 1
11	A11	97	82.7128	4452.06	3093.73	Target 1
11	A11	98	82.9494	2721.9	2658.09	Target 1
11	A11	99	83.1859	4158.22	2287.03	Target 1
11	A11	100	83.4225	2818.4	2031.61	Target 1
11	A11	101	83.6591	2988.43	1894.39	Target 1
11	A11	102	83.8957	1797.41	1826.55	Target 1
11	A11	103	84.1323	684.881	1749.85	Target 1
11	A11	104	84.3689	-190.797	1595.07	Target 1
11	A11	105	84.6054	-659.078	1338.91	Target 1
11	A11	106	84.842	-2536.71	1018.9	Target 1
11	A11	107	85.0786	-2036.85	715.045	Target 1
11	A11	108	85.3152	364.927	505.2	Target 1
11	A11	109	85.5518	35.237	419.736	Target 1
11	A11	110	85.7884	-2569.79	424.995	Target 1
11	A11	111	86.025	-2547.2	447.005	Target 1
11	A11	112	86.2615	-3250.67	418.568	Target 1
11	A11	113	86.4981	-3502.89	316.268	Target 1
11	A11	114	86.7347	-3896.31	163.338	Target 1
11	A11	115	86.9713	-2394.63	1.18359	Target 1
11	A11	116	87.2079	-3243.75	-145.665	Target 1
11	A11	117	87.4445	-4095.21	-284.88	Target 1
11	A11	118	87.6811	-4147.21	-442.854	Target 1
11	A11	119	87.9176	-4637.16	-634.708	Target 1
11	A11	120	88.1542	-4258.26	-841.116	Target 1
11	A11	121	88.3908	-4329.42	-1010.19	Target 1
11	A11	122	88.6274	-2487.63	-1085.52	Target 1
11	A11	123	88.864	-3025.01	-1043.12	Target 1
11	A11	124	89.1006	-3454.35	-912.305	Target 1
11	A11	125	89.3371	-4253.51	-764.301	Target 1
11	A11	126	89.5737	-3982.74	-673.664	Target 1
11	A11	127	89.8103	-5393.96	-675.829	Target 1
11	A11	128	90.0469	-4068.79	-747.588	Target 1
11	A11	129	90.2835	-3392.99	-822.609	Target 1
11	A11	130	90.5201	-4320.67	-832.355	Target 1
11	A11	131	90.7567	-3320.37	-747.496	Target 1
11	A11	132	90.9932	-2697.29	-595.084	Target 1
11	A11	133	91.2298	-5783.17	-441.62	Target 1
11	A11	134	91.4664	-5202.72	-353.255	Target 1
11	A11	135	91.703	-4794.31	-358.989	Target 1
11	A11	136	91.9396	-5534.18	-440.153	Target 1
11	A11	137	92.1762	-3595.35	-550.439	Target 1
11	A11	138	92.4128	-5823.26	-649.202	Target 1
11	A11	139	92.6493	-4246.32	-723.416	Target 1
11	A11	140	92.8859	-5638.24	-785.243	Target 1
11	A11	141	93.1225	-5131.76	-851.698	Target 1
11	A11	142	93.3591	-5485.98	-924.726	Target 1
11	A11	143	93.5957	-5006.06	-987.038	Target 1
11	A11	144	93.8323	-4197.44	-1015.73	Target 1
11	A11	145	94.0688	-5336.09	-1002.35	Target 1
11	A11	146	94.3054	-3746.49	-963.595	Target 1
11	A11	147	94.542	-6462.39	-934.135	Target 1
11	A11	148	94.7786	-5486.93	-946.414	Target 1
12	A12	1	60.0006	455160	9236.57	Target 1
12	A12	2	60.2372	452106	9492.01	Target 1
12	A12	3	60.4738	449725	9710.93	Target 1
12	A12	4	60.7104	447738	9865.45	Target 1
12	A12	5	60.9469	444357	9949.31	Target 1
12	A12	6	61.1835	443414	9985.35	Target 1
12	A12	7	61.4201	439183	10019.7	Target 1
12	A12	8	61.6567	436118	10096.5	Target 1
12	A12	9	61.8933	434687	10243.4	Target 1
12	A12	10	62.1299	432162	10455.6	Target 1
12	A12	11	62.3665	430699	10697.5	Target 1
12	A12	12	62.603	426062	10922.6	Target 1
12	A12	13	62.8396	422199	11098.8	Target 1
12	A12	14	63.0762	419256	11221.6	Target 1
12	A12	15	63.3128	418495	11305.9	Target 1
12	A12	16	63.5494	414005	11366.6	Target 1
12	A12	17	63.786	410035	11403.2	Target 1
12	A12	18	64.0225	409447	11398.8	Target 1
12	A12	19	64.2591	404265	11333.4	Target 1
12	A12	20	64.4957	401883	11200	Target 1
12	A12	21	64.7323	398928	11016.5	Target 1
12	A12	22	64.9689	395685	10823.5	Target 1
12	A12	23	65.2055	392169	10669.1	Target 1
12	A12	24	65.4421	392030	10585.9	Target 1
12	A12	25	65.6786	389094	10576.1	Target 1
12	A12	26	65.9152	384704	10613.9	Target 1
12	A12	27	66.1518	382714	10664	Target 1
12	A12	28	66.3884	379107	10703	Target 1
12	A12	29	66.625	376798	10728.9	Target 1
12	A12	30	66.8616	374241	10753.9	Target 1
12	A12	31	67.0982	370667	10788.7	Target 1
12	A12	32	67.3347	368945	10830.5	Target 1
12	A12	33	67.5713	365908	10862.9	Target 1
12	A12	34	67.8079	362045	10866.2	Target 1
12	A12	35	68.0445	359894	10830.2	Target 1
12	A12	36	68.2811	355587	10758.2	Target 1
12	A12	37	68.5177	354914	10662.7	Target 1
12	A12	38	68.7542	352303	10559.3	Target 1
12	A12	39	68.9908	347785	10466.8	Target 1
12	A12	40	69.2274	345065	10410.3	Target 1
12	A12	41	69.464	342485	10416.8	Target 1
12	A12	42	69.7006	342211	10498.8	Target 1
12	A12	43	69.9372	339167	10635.3	Target 1
12	A12	44	70.1738	335285	10771.5	Target 1
12	A12	45	70.4103	331261	10843.3	Target 1
12	A12	46	70.6469	329035	10811.6	Target 1
12	A12	47	70.8835	325772	10681.9	Target 1
12	A12	48	71.1201	324008	10496.7	Target 1
12	A12	49	71.3567	321689	10309.8	Target 1
12	A12	50	71.5933	318768	10163.8	Target 1
12	A12	51	71.8298	315065	10082.5	Target 1
12	A12	52	72.0664	314220	10075	Target 1
12	A12	53	72.303	310247	10141.6	Target 1
12	A12	54	72.5396	309409	10272.4	Target 1
12	A12	55	72.7762	304152	10442.5	Target 1
12	A12	56	73.0128	304246	10612.4	Target 1
12	A12	57	73.2494	299774	10739.2	Target 1
12	A12	58	73.4859	296832	10799.9	Target 1
12	A12	59	73.7225	293088	10816.8	Target 1
12	A12	60	73.9591	291212	10869.4	Target 1
12	A12	61	74.1957	288117	11086.1	Target 1
12	A12	62	74.4323	287316	11620.3	Target 1
12	A12	63	74.6689	284526	12635.9	Target 1
12	A12	64	74.9055	281072	14322.9	Target 1
12	A12	65	75.142	276345	16943	Target 1
12	A12	66	75.3786	272677	20869.9	Target 1
12	A12	67	75.6152	268859	26568.2	Target 1
12	A12	68	75.8518	263625	34471.5	Target 1
12	A12	69	76.0884	257067	44764.1	Target 1
12	A12	70	76.325	248238	57136.5	Target 1
12	A12	71	76.5616	230446	70629.7	Target 1
12	A12	72	76.7981	204979	83674.8	Target 1
12	A12	73	77.0347	170457	94368.7	Target 1
12	A12	74	77.2713	131434	100920	Target 1
12	A12	75	77.5079	96434.9	102121	Target 1
12	A12	76	77.7445	62978.2	97673.5	Target 1
12	A12	77	77.9811	35724.1	88259.8	Target 1
12	A12	78	78.2177	18142.1	75342	Target 1
12	A12	79	78.4542	9019.82	60770.9	Target 1
12	A12	80	78.6908	1366.66	46340.3	Target 1
12	A12	81	78.9274	1143.51	33428.5	Target 1
12	A12	82	79.164	-1196.08	22818.5	Target 1
12	A12	83	79.4006	-4204.89	14716.1	Target 1
12	A12	84	79.6372	-2631.04	8812.93	Target 1
12	A12	85	79.8737	-2873.9	4510.44	Target 1
12	A12	86	80.1103	-3862.8	1757.2	Target 1
12	A12	87	80.3469	-2314.47	125.169	Target 1
12	A12	88	80.5835	-2428.89	-714.903	Target 1
12	A12	89	80.8201	-1177.42	-1015.17	Target 1
12	A12	90	81.0567	-1576.88	-982.781	Target 1
12	A12	91	81.2933	-1913.48	-794.907	Target 1
12	A12	92	81.5298	-3441.86	-590.413	Target 1
12	A12	93	81.7664	-2755.04	-451.444	Target 1
12	A12	94	82.003	-4106.43	-396.364	Target 1
12	A12	95	82.2396	-2938.92	-396.5	Target 1
12	A12	96	82.4762	-2368.76	-410.64	Target 1
12	A12	97	82.7128	-3809.8	-417.415	Target 1
12	A12	98	82.9494	-2890.74	-427.274	Target 1
12	A12	99	83.1859	-4445.68	-470.685	Target 1
12	A12	100	83.4225	-4953.17	-574.6	Target 1
12	A12	101	83.6591	-3631.86	-743.498	Target 1
12	A12	102	83.8957	-3583.5	-953.933	Target 1
12	A12	103	84.1323	-5483.4	-1161.72	Target 1
12	A12	104	84.3689	-4898.52	-1316.32	Target 1
12	A12	105	84.6054	-859.728	-1377.17	Target 1
12	A12	106	84.842	-4688.58	-1327.12	Target 1
12	A12	107	85.0786	-4375	-1178.83	Target 1
12	A12	108	85.3152	-2266.84	-971.896	Target 1
12	A12	109	85.5518	-3830.28	-761.662	Target 1
12	A12	110	85.7884	-3431.35	-603.165	Target 1
12	A12	111	86.025	-5469.91	-533.724	Target 1
12	A12	112	86.2615	-4391.07	-559.404	Target 1
12	A12	113	86.4981	-4747.24	-651.5	Target 1
12	A12	114	86.7347	-4518.18	-756.83	Target 1
12	A12	115	86.9713	-4266.2	-819.449	Target 1
12	A12	116	87.2079	-5157.8	-805.432	Target 1
12	A12	117	87.4445	-3700.13	-719.833	Target 1
12	A12	118	87.6811	-4124	-606.165	Target 1
12	A12	119	87.9176	-5707.84	-524.976	Target 1
12	A12	120	88.1542	-6655.97	-520.098	Target 1
12	A12	121	88.3908	-5465.82	-592.678	Target 1
12	A12	122	88.6274	-4894.89	-702.175	Target 1
12	A12	123	88.864	-4809.19	-795.117	Target 1
12	A12	124	89.1006	-5054.35	-840.013	Target 1
12	A12	125	89.3371	-6077.98	-841.625	Target 1
12	A12	126	89.5737	-5658.4	-826.078	Target 1
12	A12	127	89.8103	-5899.51	-813.106	Target 1
12	A12	128	90.0469	-6114.21	-800.716	Target 1
12	A12	129	90.2835	-4817.12	-773.765	Target 1
12	A12	130	90.5201	-5522.91	-725.833	Target 1
12	A12	131	90.7567	-6254.73	-672.871	Target 1
12	A12	132	90.9932	-6029.27	-645.565	Target 1
12	A12	133	91.2298	-7358.37	-666.697	Target 1
12	A12	134	91.4664	-6471.42	-732.767	Target 1
12	A12	135	91.703	-5519.42	-815.26	Target 1
12	A12	136	91.9396	-6733.99	-880.251	Target 1
12	A12	137	92.1762	-5886.38	-910.716	Target 1
12	A12	138	92.4128	-7248.67	-915.217	Target 1
12	A12	139	92.6493	-5271.74	-918.246	Target 1
12	A12	140	92.8859	-7999.18	-940.538	Target 1
12	A12	141	93.1225	-6429.95	-983.434	Target 1
12	A12	142	93.3591	-6405.95	-1027.88	Target 1
12	A12	143	93.5957	-7120.9	-1049.01	Target 1
12	A12	144	93.8323	-4853.21	-1036.46	Target 1
12	A12	145	94.0688	-7130.47	-1005	Target 1
12	A12	146	94.3054	-7676.56	-986.619	Target 1
12	A12	147	94.542	-6587.91	-1009.24	Target 1
12	A12	148	94.7786	-6813.96	-1078.73	Target 1
13	A13	1	60.0004	418813	10102.7	Target 1
13	A13	2	60.2371	419082	10268.9	Target 1
13	A13	3	60.4739	413823	10412.8	Target 1
13	A13	4	60.7106	411948	10515	Target 1
13	A13	5	60.9473	409965	10579.1	Target 1
13	A13	6	61.184	407678	10608.3	Target 1
13	A13	7	61.4208	404272	10612.5	Target 1
13	A13	8	61.6575	401179	10606.2	Target 1
13	A13	9	61.8942	398519	10606.3	Target 1
13	A13	10	62.1309	396656	10626.8	Target 1
13	A13	11	62.3677	393423	10672.5	Target 1
13	A13	12	62.6044	390517	10737.4	Target 1
13	A13	13	62.8411	388789	10810.9	Target 1
13	A13	14	63.0778	385155	10887.4	Target 1
13	A13	15	63.3146	381120	10971	Target 1
13	A13	16	63.5513	378787	11069.4	Target 1
13	A13	17	63.788	378786	11181.8	Target 1
13	A13	18	64.0248	373804	11293.6	Target 1
13	A13	19	64.2615	370168	11384	Target 1
13	A13	20	64.4982	367584	11440.1	Target 1
13	A13	21	64.7349	364332	11464.5	Target 1
13	A13	22	64.9717	363029	11469.8	Target 1
13	A13	23	65.2084	358110	11466.3	Target 1
13	A13	24	65.4451	358024	11456.8	Target 1
13	A13	25	65.6818	351800	11439	Target 1
13	A13	26	65.9186	349803	11410.9	Target 1
13	A13	27	66.1553	348013	11370.3	Target 1
13	A13	28	66.392	344999	11311.4	Target 1
13	A13	29	66.6287	341634	11223.1	Target 1
13	A13	30	66.8655	337807	11097	Target 1
13	A13	31	67.1022	335002	10934.6	Target 1
13	A13	32	67.3389	333861	10749.8	Target 1
13	A13	33	67.5757	330128	10564.1	Target 1
13	A13	34	67.8124	328085	10402.7	Target 1
13	A13	35	68.0491	325160	10283.3	Target 1
13	A13	36	68.2858	321077	10245.9	Target 1
13	A13	37	68.5226	321487	10316.9	Target 1
13	A13	38	68.7593	318761	10472.3	Target 1
13	A13	39	68.996	314863	10673.2	Target 1
13	A13	40	69.2327	312595	10864.6	Target 1
13	A13	41	69.4695	308222	10987.9	Target 1
13	A13	42	69.7062	307263	11009.8	Target 1
13	A13	43	69.9429	302352	10932.9	Target 1
13	A13	44	70.1796	301131	10788.8	Target 1
13	A13	45	70.4164	298460	10621.9	Target 1
13	A13	46	70.6531	294796	10472.9	Target 1
13	A13	47	70.8898	294061	10368.4	Target 1
13	A13	48	71.1266	290665	10313.8	Target 1
13	A13	49	71.3633	287363	10317.6	Target 1
13	A13	50	71.6	286746	10368.4	Target 1
13	A13	51	71.8367	281881	10443.4	Target 1
13	A13	52	72.0735	280703	10531.2	Target 1
13	A13	53	72.3102	277883	10615.7	Target 1
13	A13	54	72.5469	274097	10684.2	Target 1
13	A13	55	72.7836	271795	10733.7	Target 1
13	A13	56	73.0204	270127	10776	Target 1
13	A13	57	73.2571	265031	10837	Target 1
13	A13	58	73.4938	264428	10946.4	Target 1
13	A13	59	73.7306	262039	11126.1	Target 1
13	A13	60	73.9673	259293	11384.9	Target 1
13	A13	61	74.204	254784	11732.7	Target 1
13	A13	62	74.4407	252129	12212.7	Target 1
13	A13	63	74.6775	249136	12939	Target 1
13	A13	64	74.9142	245961	14125.9	Target 1
13	A13	65	75.1509	244034	16098.2	Target 1
13	A13	66	75.3876	240572	19276.6	Target 1
13	A13	67	75.6244	234996	24124.7	Target 1
13	A13	68	75.8611	231304	31038.2	Target 1
13	A13	69	76.0978	225962	40168	Target 1
13	A13	70	76.3345	214430	51210.9	Target 1
13	A13	71	76.5713	202296	63259.2	Target 1
13	A13	72	76.808	177052	74818.8	Target 1
13	A13	73	77.0447	142549	84064.7	Target 1
13	A13	74	77.2815	106249	89291.2	Target 1
13	A13	75	77.5182	70953.7	89402.4	Target 1
13	A13	76	77.7549	42314.7	84247.7	Target 1
13	A13	77	77.9916	21352.9	74663.2	Target 1
13	A13	78	78.2284	8910.79	62213.5	Target 1
13	A13	79	78.4651	2040.39	48747.7	Target 1
13	A13	80	78.7018	-1180.09	35944.2	Target 1
13	A13	81	78.9385	-2128.17	24989.4	Target 1
13	A13	82	79.1753	-1999.62	16455.3	Target 1
13	A13	83	79.412	-988.752	10361.7	Target 1
13	A13	84	79.6487	-3264.68	5786.36	Target 1
13	A13	85	79.8855	-2687.38	2985.08	Target 1
13	A13	86	80.1222	-3067.53	1361.05	Target 1
13	A13	87	80.3589	-2568.27	440.337	Target 1
13	A13	88	80.5956	-4059.05	-87.8105	Target 1
13	A13	89	80.8324	-3313.66	-390.571	Target 1
13	A13	90	81.0691	-2466.1	-540.383	Target 1
13	A13	91	81.3058	-2335.61	-566.648	Target 1
13	A13	92	81.5425	-3190.99	-492.964	Target 1
13	A13	93	81.7793	-3324.91	-353.337	Target 1
13	A13	94	82.016	-2408.05	-190.905	Target 1
13	A13	95	82.2527	-4056.9	-48.1699	Target 1
13	A13	96	82.4894	-3641.41	42.7139	Target 1
13	A13	97	82.7262	-3838.08	65.3721	Target 1
13	A13	98	82.9629	-4743.72	19.8037	Target 1
13	A13	99	83.1996	-4107.05	-81.0801	Target 1
13	A13	100	83.4364	-5069.57	-217.735	Target 1
13	A13	101	83.6731	-3919.38	-370.658	Target 1
13	A13	102	83.9098	-4725.1	-524.243	Target 1
13	A13	103	84.1465	-4689.14	-666.271	Target 1
13	A13	104	84.3833	-5009.62	-785.124	Target 1
13	A13	105	84.62	-4328.54	-868.87	Target 1
13	A13	106	84.8567	-3320.13	-908.111	Target 1
13	A13	107	85.0934	-5338.2	-899.91	Target 1
13	A13	108	85.3302	-3508.11	-848.593	Target 1
13	A13	109	85.5669	-4467.44	-762.663	Target 1
13	A13	110	85.8036	-4460.9	-651.593	Target 1
13	A13	111	86.0403	-4299.99	-526.314	Target 1
13	A13	112	86.2771	-3006.16	-402.541	Target 1
13	A13	113	86.5138	-5999.96	-301.947	Target 1
13	A13	114	86.7505	-4322.69	-247.357	Target 1
13	A13	115	86.9873	-4637.36	-253.534	Target 1
13	A13	116	87.224	-5730.12	-319.623	Target 1
13	A13	117	87.4607	-5528.22	-428.519	Target 1
13	A13	118	87.6974	-4632.72	-553.566	Target 1
13	A13	119	87.9342	-4919.24	-667.835	Target 1
13	A13	120	88.1709	-5881.62	-750.419	Target 1
13	A13	121	88.4076	-4174.52	-788.141	Target 1
13	A13	122	88.6443	-5537.08	-775.792	Target 1
13	A13	123	88.8811	-4506.28	-718.458	Target 1
13	A13	124	89.1178	-4538.05	-634.226	Target 1
13	A13	125	89.3545	-5083.52	-550.807	Target 1
13	A13	126	89.5912	-5998.61	-492.321	Target 1
13	A13	127	89.828	-5423.69	-462.648	Target 1
13	A13	128	90.0647	-5797.48	-439.59	Target 1
13	A13	129	90.3014	-4389.88	-389.313	Target 1
13	A13	130	90.5382	-4621.4	-294.246	Target 1
13	A13	131	90.7749	-6300.78	-173.871	Target 1
13	A13	132	91.0116	-5474.5	-80.4404	Target 1
13	A13	133	91.2483	-6978.88	-70.0225	Target 1
13	A13	134	91.4851	-6999.92	-168.067	Target 1
13	A13	135	91.7218	-6172.19	-352.635	Target 1
13	A13	136	91.9585	-6525.04	-565.192	Target 1
13	A13	137	92.1952	-5774.84	-740.289	Target 1
13	A13	138	92.432	-5944.48	-834.843	Target 1
13	A13	139	92.6687	-5942.36	-841.089	Target 1
13	A13	140	92.9054	-6187.56	-779.495	Target 1
13	A13	141	93.1422	-5910	-680.266	Target 1
13	A13	142	93.3789	-6839.7	-567.046	Target 1
13	A13	143	93.6156	-5709.52	-452.324	Target 1
13	A13	144	93.8523	-6179.67	-344.247	Target 1
13	A13	145	94.0891	-6312.83	-255.757	Target 1
13	A13	146	94.3258	-7650.54	-205.751	Target 1
13	A13	147	94.5625	-6659.61	-209.742	Target 1
13	A13	148	94.7992	-7689.27	-267.813	Target 1
14	A14	1	60.0004	432325	9931.84	Target 1
14	A14	2	60.2371	432612	10069.9	Target 1
14	A14	3	60.4739	430036	10218	Target 1
14	A14	4	60.7106	424935	10364.7	Target 1
14	A14	5	60.9473	424895	10489.4	Target 1
14	A14	6	61.184	421251	10597.9	Target 1
14	A14	7	61.4208	419493	10690.1	Target 1
14	A14	8	61.6575	414963	10766.4	Target 1
14	A14	9	61.8942	412298	10835.4	Target 1
14	A14	10	62.1309	410067	10910.3	Target 1
14	A14	11	62.3677	406981	10998.4	Target 1
14	A14	12	62.6044	403982	11089.8	Target 1
14	A14	13	62.8411	402137	11155.5	Target 1
14	A14	14	63.0778	397284	11160.4	Target 1
14	A14	15	63.3146	395400	11085.1	Target 1
14	A14	16	63.5513	390805	10942.7	Target 1
14	A14	17	63.788	388037	10778.8	Target 1
14	A14	18	64.0248	386358	10652.4	Target 1
14	A14	19	64.2615	384481	10609.6	Target 1
14	A14	20	64.4982	380088	10663.7	Target 1
14	A14	21	64.7349	379304	10793.4	Target 1
14	A14	22	64.9717	375162	10956	Target 1
14	A14	23	65.2084	371977	11106.6	Target 1
14	A14	24	65.4451	369668	11212.1	Target 1
14	A14	25	65.6818	366014	11257.2	Target 1
14	A14	26	65.9186	363529	11243.6	Target 1
14	A14	27	66.1553	360314	11186	Target 1
14	A14	28	66.392	356340	11105.1	Target 1
14	A14	29	66.6287	354568	11020	Target 1
[truncated: 54,879 more rows]

## Sheet: Melt Curve Result
Block Type	384-Well Block
Calibration Background is expired	No
Calibration Background performed on	11-14-2023
Calibration Pure Dye ABY is expired	No
Calibration Pure Dye ABY performed on	11-14-2023
Calibration Pure Dye CY5 is expired	No
Calibration Pure Dye CY5 performed on	11-14-2023
Calibration Pure Dye FAM is expired	No
Calibration Pure Dye FAM performed on	11-14-2023
Calibration Pure Dye JUN is expired	No
Calibration Pure Dye JUN performed on	11-14-2023
Calibration Pure Dye MUSTANG PURPLE is expired	No
Calibration Pure Dye MUSTANG PURPLE performed on	11-14-2023
Calibration Pure Dye NED is expired	No
Calibration Pure Dye NED performed on	11-14-2023
Calibration Pure Dye ROX is expired	No
Calibration Pure Dye ROX performed on	11-14-2023
Calibration Pure Dye SYBR is expired	No
Calibration Pure Dye SYBR performed on	11-14-2023
Calibration Pure Dye TAMRA is expired	No
Calibration Pure Dye TAMRA performed on	11-14-2023
Calibration Pure Dye VIC is expired	No
Calibration Pure Dye VIC performed on	11-14-2023
Calibration ROI is expired	No
Calibration ROI performed on	11-14-2023
Calibration Uniformity is expired	No
Calibration Uniformity performed on	11-14-2023
Chemistry	SYBR_GREEN
Date Created	2023-11-14 18:10:19 PM CST
Experiment Barcode
Experiment Comment
Experiment File Name	E:\2023-1114_103838.eds
Experiment Name	2023-06-15_103838
Experiment Run End Time	2023-11-14 17:54:31 PM CST
Experiment Type	Standard Curve
Instrument Name	272530883
Instrument Serial Number	272530883
Instrument Type	QuantStudio™ 5 System
Passive Reference	ROX
Post-read Stage/Step
Pre-read Stage/Step
Quantification Cycle Method	Ct
Signal Smoothing On	true
Stage where Melt Analysis is performed	Stage3
Stage/ Cycle where Ct Analysis is performed	Stage2, Step2
User Name
Well	Well Position	Sample	Target Name	Tm	Melt Peak Height
1	A1	Sample 1	Target 1	77.4101	99080.2
2	A2	Sample 1	Target 1	77.4101	95820
3	A3	Sample 1	Target 1	77.4101	92553.2
4	A4	Sample 1	Target 1	77.4101	95936.6
5	A5	Sample 1	Target 1	77.5364	104237
6	A6	Sample 1	Target 1	77.5364	106973
7	A7	Sample 1	Target 1	77.5364	114671
8	A8	Sample 1	Target 1	77.5364	103464
9	A9	Sample 1	Target 1	77.5079	105653
10	A10	Sample 1	Target 1	77.5079	112873
11	A11	Sample 1	Target 1	77.3896	88375.4
12	A12	Sample 1	Target 1	77.3896	102232
13	A13	Sample 1	Target 1	77.3998	90019.9
14	A14	Sample 1	Target 1	77.3998	88984
15	A15	Sample 1	Target 1	77.2815	78927.1
16	A16	Sample 1	Target 1	77.3998	91486.3
17	A17	Sample 1	Target 1	77.5284	110370
18	A18	Sample 1	Target 1	77.5284	117631
19	A19	Sample 1	Target 1	73.2649	2471.29
20	A20	Sample 1	Target 1	66.2774	2352.45
21	A21	Sample 1	Target 1	86.2766	2628.17
22	A22	Sample 1	Target 1	62.6044	5671.9
23	A23	Sample 1	Target 1	79.175	3048.86
24	A24	Sample 1	Target 1	60.5923	2844.45
25	B1	Sample 1	Target 1	79.8972	2714.75
26	B2	Sample 1	Target 1	61.7771	2320.18
27	B3	Sample 1	Target 1	74.4493	2229.35
28	B4	Sample 1	Target 1	67.4618	1925.83
29	B5	Sample 1	Target 1	94.9538	3236.07
30	B6	Sample 1	Target 1	71.2567	2706.27
31	B7	Sample 1	Target 1	80.2616	2237.16
32	B8	Sample 1	Target 1	71.4937	4091.9
33	B9	Sample 1	Target 1	88.6274	2732.58
34	B10	Sample 1	Target 1	71.3567	1951.67
35	B11	Sample 1	Target 1	91.9396	1976.9
36	B12	Sample 1	Target 1	65.4421	1860.8
37	B13	Sample 1	Target 1	60.0004	2705.58
38	B14	Sample 1	Target 1	85.4485	2154.52
39	B15	Sample 1	Target 1	91.13	2325.47
40	B16	Sample 1	Target 1	91.4851	2302.43
41	B17	Sample 1	Target 1	83.2131	2761.12
42	B18	Sample 1	Target 1	71.2515	2746.49
43	B19	Sample 1	Target 1	85.2265	1792.04
44	B20	Sample 1	Target 1	60.0005	2203.48
45	B21	Sample 1	Target 1	91.7213	3073.66
46	B22	Sample 1	Target 1	67.5756	3170.42
47	B23	Sample 1	Target 1	88.4071	2793.08
48	B24	Sample 1	Target 1	60.0005	2858.19
49	C1	Sample 1	Target 1	84.2791	63492.9
50	C2	Sample 1	Target 1	84.2791	68355.3
51	C3	Sample 1	Target 1	84.2791	76921.8
52	C4	Sample 1	Target 1	84.2791	57925.2
53	C5	Sample 1	Target 1	84.2901	57176.2
54	C6	Sample 1	Target 1	84.2901	62110.9
55	C7	Sample 1	Target 1	84.4086	66131
56	C8	Sample 1	Target 1	84.4086	66346.2
57	C9	Sample 1	Target 1	84.2506	68907.9
58	C10	Sample 1	Target 1	84.3689	65492.9
59	C11	Sample 1	Target 1	84.3689	66769.3
60	C12	Sample 1	Target 1	84.3689	65930.3
61	C13	Sample 1	Target 1	84.3833	67152.4
62	C14	Sample 1	Target 1	84.3833	67442.5
63	C15	Sample 1	Target 1	84.3833	68444.6
64	C16	Sample 1	Target 1	84.3833	71539.5
65	C17	Sample 1	Target 1	84.5159	65313.6
66	C18	Sample 1	Target 1	84.3975	74596
67	C19	Sample 1	Target 1	94.4642	2562.39
68	C20	Sample 1	Target 1	60.0005	3764.79
69	C21	Sample 1	Target 1	60.0005	3183.02
70	C22	Sample 1	Target 1	94.917	4272.79
71	C23	Sample 1	Target 1	60.1189	4481.6
72	C24	Sample 1	Target 1	76.0976	2641.87
73	D1	Sample 1	Target 1	85.2266	2649
74	D2	Sample 1	Target 1	78.3575	1972.56
75	D3	Sample 1	Target 1	64.9747	2862.76
76	D4	Sample 1	Target 1	62.1324	2126.29
77	D5	Sample 1	Target 1	60.2376	2029.08
78	D6	Sample 1	Target 1	67.2282	2067.88
79	D7	Sample 1	Target 1	63.7921	2768.64
80	D8	Sample 1	Target 1	69.7164	2043.64
81	D9	Sample 1	Target 1	63.6677	1842.84
82	D10	Sample 1	Target 1	60.0006	2699.55
83	D11	Sample 1	Target 1	60.0006	2074.93
84	D12	Sample 1	Target 1	60.0006	3253.29
85	D13	Sample 1	Target 1	94.9176	2311.62
86	D14	Sample 1	Target 1	76.0978	1586.18
87	D15	Sample 1	Target 1	63.3146	2501.17
88	D16	Sample 1	Target 1	81.6609	2038.05
89	D17	Sample 1	Target 1	81.0814	2183.56
90	D18	Sample 1	Target 1	94.9379	2513.86
91	D19	Sample 1	Target 1	77.7653	2334.25
92	D20	Sample 1	Target 1	82.8578	3197.57
93	D21	Sample 1	Target 1	76.6894	2587.25
94	D22	Sample 1	Target 1	70.1796	4569.43
95	D23	Sample 1	Target 1	72.7835	2696.51
96	D24	Sample 1	Target 1	64.2615	3454.79
97	E1	Sample 1	Target 1	62.6061	3428.16
98	E2	Sample 1	Target 1	69.3567	2345.72
99	E3	Sample 1	Target 1	73.9756	1662.3
100	E4	Sample 1	Target 1	91.385	2949.32
101	E5	Sample 1	Target 1	71.0197	2366.38
102	E6	Sample 1	Target 1	94.9538	2691.54
103	E7	Sample 1	Target 1	87.2522	2303.16
104	E8	Sample 1	Target 1	85.5934	1942.54
105	E9	Sample 1	Target 1	69.3457	2043.04
106	E10	Sample 1	Target 1	74.1957	2078.3
107	E11	Sample 1	Target 1	84.7237	2564.07
108	E12	Sample 1	Target 1	94.0688	2349.23
109	E13	Sample 1	Target 1	70.0613	1930.71
110	E14	Sample 1	Target 1	94.5625	2489.86
111	E15	Sample 1	Target 1	81.4242	1972.04
112	E16	Sample 1	Target 1	94.3258	3068.45
113	E17	Sample 1	Target 1	65.4484	2181
114	E18	Sample 1	Target 1	70.7778	2139.33
115	E19	Sample 1	Target 1	91.2665	2597.95
116	E20	Sample 1	Target 1	89.7269	3730.77
117	E21	Sample 1	Target 1	94.917	3807.19
118	E22	Sample 1	Target 1	74.5589	2467.53
119	E23	Sample 1	Target 1	60.1189	2945.89
120	E24	Sample 1	Target 1	94.917	3378.65
121	F1	Sample 1	Target 1	60.0006	2504.93
122	F2	Sample 1	Target 1	63.3167	1853.49
123	F3	Sample 1	Target 1	67.3434	2099.38
124	F4	Sample 1	Target 1	60.0006	3013.59
125	F5	Sample 1	Target 1	94.9538	2025.78
126	F6	Sample 1	Target 1	94.9538	3912.58
127	F7	Sample 1	Target 1	83.9347	2305.72
128	F8	Sample 1	Target 1	83.4607	3142.67
129	F9	Sample 1	Target 1	60.0006	1952.58
130	F10	Sample 1	Target 1	63.786	1714.06
131	F11	Sample 1	Target 1	87.0896	2301.66
132	F12	Sample 1	Target 1	94.8969	1814.42
133	F13	Sample 1	Target 1	75.3876	1958.18
134	F14	Sample 1	Target 1	93.2605	2225.39
135	F15	Sample 1	Target 1	86.2771	2264.13
136	F16	Sample 1	Target 1	69.1144	2268.6
137	F17	Sample 1	Target 1	62.1323	2113.82
138	F18	Sample 1	Target 1	60.1189	2820.66
139	F19	Sample 1	Target 1	81.6735	2659.24
140	F20	Sample 1	Target 1	69.3566	2129
141	F21	Sample 1	Target 1	67.9307	2277.56
142	F22	Sample 1	Target 1	62.4861	2019.88
143	F23	Sample 1	Target 1	63.6697	2459.54
144	F24	Sample 1	Target 1	83.6727	2555.43
145	G1	Sample 1	Target 1	92.6878	2392.2
146	G2	Sample 1	Target 1	94.938	2439.5
147	G3	Sample 1	Target 1	67.2249	1701.8
148	G4	Sample 1	Target 1	94.938	4389.72
149	G5	Sample 1	Target 1	81.5649	2285.17
150	G6	Sample 1	Target 1	81.8019	2253.58
151	G7	Sample 1	Target 1	71.2567	2043.93
152	G8	Sample 1	Target 1	90.9253	2416.98
153	G9	Sample 1	Target 1	90.875	2324.78
154	G10	Sample 1	Target 1	71.3567	2527.83
155	G11	Sample 1	Target 1	84.842	1700.76
156	G12	Sample 1	Target 1	60.0006	2592.81
157	G13	Sample 1	Target 1	82.1344	2262.99
158	G14	Sample 1	Target 1	62.7228	2271.49
159	G15	Sample 1	Target 1	92.0769	2316.43
160	G16	Sample 1	Target 1	62.7228	1997.89
161	G17	Sample 1	Target 1	74.4492	2644.87
162	G18	Sample 1	Target 1	65.6852	2079.04
163	G19	Sample 1	Target 1	81.1998	2545.15
164	G20	Sample 1	Target 1	85.5818	3416.55
165	G21	Sample 1	Target 1	94.6803	3081.86
166	G22	Sample 1	Target 1	87.5786	3299.14
167	G23	Sample 1	Target 1	71.7182	2166.49
168	G24	Sample 1	Target 1	93.2599	2335.25
169	H1	Sample 1	Target 1	71.3701	2012.31
170	H2	Sample 1	Target 1	62.6061	2229.79
171	H3	Sample 1	Target 1	71.2516	1847.93
172	H4	Sample 1	Target 1	88.5427	2481.08
173	H5	Sample 1	Target 1	92.1101	1833.09
174	H6	Sample 1	Target 1	67.4652	1661.51
175	H7	Sample 1	Target 1	86.0674	2162.28
176	H8	Sample 1	Target 1	68.1761	1639.37
177	H9	Sample 1	Target 1	92.4128	2771.65
178	H10	Sample 1	Target 1	71.2384	1878.17
179	H11	Sample 1	Target 1	60.0006	2471.9
180	H12	Sample 1	Target 1	71.2384	2028.6
181	H13	Sample 1	Target 1	76.3345	1364.82
182	H14	Sample 1	Target 1	63.1962	2073.17
183	H15	Sample 1	Target 1	72.1918	1697.98
184	H16	Sample 1	Target 1	61.6575	2659.12
185	H17	Sample 1	Target 1	60.0005	2003.82
186	H18	Sample 1	Target 1	74.2123	8550.13
187	H19	Sample 1	Target 1	94.9379	2641.71
188	H20	Sample 1	Target 1	63.9088	4910.06
189	H21	Sample 1	Target 1	61.0658	2267.01
190	H22	Sample 1	Target 1	94.917	4026.24
191	H23	Sample 1	Target 1	86.2766	4472.47
192	H24	Sample 1	Target 1	88.1704	2912.89
193	I1	Sample 1	Target 1	90.2007	1995.77
194	I2	Sample 1	Target 1	84.2791	2180.34
195	I3	Sample 1	Target 1	60.0006	4655.5
196	I4	Sample 1	Target 1	60.9481	1947.25
197	I5	Sample 1	Target 1	67.1097	1831.14
198	I6	Sample 1	Target 1	60.0006	3677.56
199	I7	Sample 1	Target 1	73.271	2365.94
200	I8	Sample 1	Target 1	88.5556	2484.68
201	I9	Sample 1	Target 1	87.7993	1535.03
202	I10	Sample 1	Target 1	60.0006	2312.89
203	I11	Sample 1	Target 1	84.1323	2414.34
204	I12	Sample 1	Target 1	60.0006	2516.5
205	I13	Sample 1	Target 1	88.6443	1574.21
206	I14	Sample 1	Target 1	61.4208	2140.57
207	I15	Sample 1	Target 1	60.0004	1832.04
208	I16	Sample 1	Target 1	60.0004	2408.96
209	I17	Sample 1	Target 1	60.0005	2632.3
210	I18	Sample 1	Target 1	60.0005	1865.48
211	I19	Sample 1	Target 1	79.6602	1868.26
212	I20	Sample 1	Target 1	60.0005	3538.84
213	I21	Sample 1	Target 1	94.917	3192.25
214	I22	Sample 1	Target 1	67.694	3798.25
215	I23	Sample 1	Target 1	60.0005	2113.94
216	I24	Sample 1	Target 1	68.049	3743.87
217	J1	Sample 1	Target 1	91.2666	3199.86
218	J2	Sample 1	Target 1	66.5144	2882.96
219	J3	Sample 1	Target 1	94.938	3123.77
220	J4	Sample 1	Target 1	61.0665	1658.22
221	J5	Sample 1	Target 1	69.3609	2205.07
222	J6	Sample 1	Target 1	77.181	2086.24
223	J7	Sample 1	Target 1	94.9538	3857.74
224	J8	Sample 1	Target 1	81.2095	2097.76
225	J9	Sample 1	Target 1	94.8969	1911.78
226	J10	Sample 1	Target 1	77.0347	2849.03
227	J11	Sample 1	Target 1	84.1323	1896.47
228	J12	Sample 1	Target 1	90.5201	2095.75
229	J13	Sample 1	Target 1	60.0004	1890.57
230	J14	Sample 1	Target 1	94.9176	3055.1
231	J15	Sample 1	Target 1	88.0525	2977.04
232	J16	Sample 1	Target 1	86.3954	2151.31
233	J17	Sample 1	Target 1	62.1323	2531.88
234	J18	Sample 1	Target 1	69.3566	2351.29
235	J19	Sample 1	Target 1	87.2398	2567.68
236	J20	Sample 1	Target 1	60.0005	1912.9
237	J21	Sample 1	Target 1	60.0005	2479.2
238	J22	Sample 1	Target 1	76.0976	1856.6
239	J23	Sample 1	Target 1	81.5422	3519.7
240	J24	Sample 1	Target 1	60.0005	2179.13
241	K1	Sample 1	Target 1	86.4109	2402.05
242	K2	Sample 1	Target 1	75.9889	2238.97
243	K3	Sample 1	Target 1	60.0006	3277.87
244	K4	Sample 1	Target 1	86.5293	2929.67
245	K5	Sample 1	Target 1	88.0816	2013.04
246	K6	Sample 1	Target 1	83.4607	1764.32
247	K7	Sample 1	Target 1	90.5698	2310.53
248	K8	Sample 1	Target 1	60.0006	2184.59
249	K9	Sample 1	Target 1	60.0006	1996.68
250	K10	Sample 1	Target 1	72.6579	2339.65
251	K11	Sample 1	Target 1	63.6677	1643.29
252	K12	Sample 1	Target 1	86.025	2640.29
253	K13	Sample 1	Target 1	86.5138	2182.62
254	K14	Sample 1	Target 1	75.6244	1622.51
255	K15	Sample 1	Target 1	61.6575	3028.54
256	K16	Sample 1	Target 1	87.224	2182.55
257	K17	Sample 1	Target 1	79.7786	1788.27
258	K18	Sample 1	Target 1	60.2374	1885.2
259	K19	Sample 1	Target 1	92.6877	2476.79
260	K20	Sample 1	Target 1	71.7253	1800.18
261	K21	Sample 1	Target 1	86.6317	2740.04
262	K22	Sample 1	Target 1	61.0658	2317.22
263	K23	Sample 1	Target 1	60.0005	7471.83
264	K24	Sample 1	Target 1	64.9717	2283.39
265	L1	Sample 1	Target 1	79.0681	2548.48
266	L2	Sample 1	Target 1	69.3567	3434.9
267	L3	Sample 1	Target 1	66.9881	4473.11
268	L4	Sample 1	Target 1	94.938	3601.88
269	L5	Sample 1	Target 1	60.0006	3101.54
270	L6	Sample 1	Target 1	67.3467	2665.12
271	L7	Sample 1	Target 1	94.9538	4648.51
272	L8	Sample 1	Target 1	88.3186	2141.54
273	L9	Sample 1	Target 1	82.9494	2002.19
274	L10	Sample 1	Target 1	94.8969	5679.8
275	L11	Sample 1	Target 1	63.0762	2167.04
276	L12	Sample 1	Target 1	88.1542	2018.48
277	L13	Sample 1	Target 1	62.9595	1321.7
278	L14	Sample 1	Target 1	87.3423	1498.55
279	L15	Sample 1	Target 1	88.0525	1995.9
280	L16	Sample 1	Target 1	93.734	2016.44
281	L17	Sample 1	Target 1	63.5535	1855.63
282	L18	Sample 1	Target 1	60.0005	3291.29
283	L19	Sample 1	Target 1	66.0405	2691.1
284	L20	Sample 1	Target 1	65.3299	2291.16
285	L21	Sample 1	Target 1	82.4891	2451.38
286	L22	Sample 1	Target 1	88.2888	2700.76
287	L23	Sample 1	Target 1	88.2888	2128.97
288	L24	Sample 1	Target 1	72.0733	2807.11
289	M1	Sample 1	Target 1	81.6736	2291.95
290	M2	Sample 1	Target 1	60.0006	3717.26
291	M3	Sample 1	Target 1	78.2391	2299.09
292	M4	Sample 1	Target 1	94.938	2291.95
293	M5	Sample 1	Target 1	69.7164	2131.64
294	M6	Sample 1	Target 1	66.0434	1900.35
295	M7	Sample 1	Target 1	60.0006	2039.51
296	M8	Sample 1	Target 1	62.1333	2267.99
297	M9	Sample 1	Target 1	60.5921	1985.86
298	M10	Sample 1	Target 1	64.8506	2053.85
299	M11	Sample 1	Target 1	69.464	1670.34
300	M12	Sample 1	Target 1	71.3567	1743.93
301	M13	Sample 1	Target 1	94.9176	3201.78
302	M14	Sample 1	Target 1	94.9176	2581.89
303	M15	Sample 1	Target 1	60.0004	3301.6
304	M16	Sample 1	Target 1	76.9264	2080.71
305	M17	Sample 1	Target 1	64.8562	3249.57
306	M18	Sample 1	Target 1	64.264	2478.97
307	M19	Sample 1	Target 1	60.0005	3047.41
308	M20	Sample 1	Target 1	60.0005	1874.09
309	M21	Sample 1	Target 1	70.1796	2145.58
310	M22	Sample 1	Target 1	60.0005	3544.77
311	M23	Sample 1	Target 1	69.351	1913.86
312	M24	Sample 1	Target 1	60.0005	3808.85
313	N1	Sample 1	Target 1	64.2641	2272.14
314	N2	Sample 1	Target 1	94.938	1791.39
315	N3	Sample 1	Target 1	71.3701	1995.27
316	N4	Sample 1	Target 1	60.0006	2831.94
317	N5	Sample 1	Target 1	89.2665	2197.72
318	N6	Sample 1	Target 1	94.9538	2038.64
319	N7	Sample 1	Target 1	77.6549	1874.24
320	N8	Sample 1	Target 1	81.2095	2447.94
321	N9	Sample 1	Target 1	86.3798	1832.12
322	N10	Sample 1	Target 1	74.7872	2021.79
323	N11	Sample 1	Target 1	73.2494	3204.93
324	N12	Sample 1	Target 1	73.3677	2464.26
325	N13	Sample 1	Target 1	92.6687	2779.95
326	N14	Sample 1	Target 1	63.788	3411.87
327	N15	Sample 1	Target 1	60.3555	1881.16
328	N16	Sample 1	Target 1	66.8655	1661.78
329	N17	Sample 1	Target 1	76.4625	2710.86
330	N18	Sample 1	Target 1	92.214	1788.93
331	N19	Sample 1	Target 1	68.1723	2269.22
332	N20	Sample 1	Target 1	86.8845	2159.75
333	N21	Sample 1	Target 1	94.917	2154.23
334	N22	Sample 1	Target 1	89.9458	2389.88
335	N23	Sample 1	Target 1	68.6409	2362.69
336	N24	Sample 1	Target 1	79.0566	3349.61
337	O1	Sample 1	Target 1	80.4893	2400.52
338	O2	Sample 1	Target 1	61.0665	2803.85
339	O3	Sample 1	Target 1	60.0006	2288.92
340	O4	Sample 1	Target 1	94.938	2516.29
341	O5	Sample 1	Target 1	62.9627	1932.87
342	O6	Sample 1	Target 1	68.5315	2292.27
343	O7	Sample 1	Target 1	63.3182	1939.66
344	O8	Sample 1	Target 1	94.9538	2381.37
345	O9	Sample 1	Target 1	90.875	1543.91
346	O10	Sample 1	Target 1	73.3677	1735.96
347	O11	Sample 1	Target 1	84.9603	1958.39
348	O12	Sample 1	Target 1	94.8969	2754.67
349	O13	Sample 1	Target 1	60.0004	2152.58
350	O14	Sample 1	Target 1	93.4972	1798.58
351	O15	Sample 1	Target 1	94.9176	1889.02
352	O16	Sample 1	Target 1	77.6365	3610.9
353	O17	Sample 1	Target 1	60.0005	2420.5
354	O18	Sample 1	Target 1	78.3574	2195.85
355	O19	Sample 1	Target 1	60.0005	3953.9
356	O20	Sample 1	Target 1	79.1865	1670.3
357	O21	Sample 1	Target 1	63.5513	2391.46
358	O22	Sample 1	Target 1	89.1173	2868.75
359	O23	Sample 1	Target 1	93.615	2370.6
360	O24	Sample 1	Target 1	94.917	2921.3
361	P1	Sample 1	Target 1	94.7011	3790.85
362	P2	Sample 1	Target 1	81.9105	2912.61
363	P3	Sample 1	Target 1	60.0006	2439.68
364	P4	Sample 1	Target 1	94.2274	2603.4
365	P5	Sample 1	Target 1	81.2095	2893.15
366	P6	Sample 1	Target 1	92.2286	2241
367	P7	Sample 1	Target 1	60.0006	2426.48
368	P8	Sample 1	Target 1	60.0006	2319.06
369	P9	Sample 1	Target 1	82.4762	1890.32
370	P10	Sample 1	Target 1	60.0006	2262.57
371	P11	Sample 1	Target 1	94.542	3910.78
372	P12	Sample 1	Target 1	60.0006	2237
373	P13	Sample 1	Target 1	85.2118	2012.66
374	P14	Sample 1	Target 1	70.8898	2001.81
375	P15	Sample 1	Target 1	60.0004	2560.69
376	P16	Sample 1	Target 1	91.13	2280.92
377	P17	Sample 1	Target 1	64.8562	2098.66
378	P18	Sample 1	Target 1	60.0005	4941.51
379	P19	Sample 1	Target 1	60.0005	3780.79
380	P20	Sample 1	Target 1	94.8195	3522.01
381	P21	Sample 1	Target 1	90.656	3599.31
382	P22	Sample 1	Target 1	60.0005	3338.17
383	P23	Sample 1	Target 1	87.5786	2484.67
384	P24	Sample 1	Target 1	91.2478	2710.42
